# Supplementary material
Source: PubMed Central journal article supplement (PMC3028934)
Supplement: NIHMS258484-supplement-1_si_001.pdf [file NIHMS258484-supplement-1_si_001.pdf]

# Asymmetric Synthesis of Tertiary Benzylic Alcohols

*Monika I. Antczak, Feng Cai and Joseph M. Ready\**

Department of Biochemistry, The University of Texas Southwestern Medical Center, 5323 Harry Hines  
Boulevard, Dallas, Texas 75390-9038  
joseph.ready@utsouthwestern.edu

## Supporting Information

| <b>Table of Contents:</b>                                                                                 | Page |
|-----------------------------------------------------------------------------------------------------------|------|
| 1. Method and Materials                                                                                   | S2   |
| 2. Preparation of ( <i>S</i> )-Sulfoxide starting materials <b>1</b>                                      | S2   |
| 3. General procedure for the addition of alkynyl-cerium to sulfinyl ketones <b>1</b>                      | S4   |
| 4. General procedure for the addition of aryl-, and alkenylmagnesium bromide to sulfinyl ketones <b>1</b> | S4   |
| 5. Experimental procedures and spectroscopic data ( <b>Table 2</b> )                                      | S4   |
| 6. General procedure for the reductive cleavage of sulfoxide and spectroscopic data ( <b>Table 3</b> )    | S9   |
| 7. Reactions with electrophile ( <b>Scheme 1</b> ) and spectroscopic data                                 | S10  |
| 8. Synthesis of <b>7</b> ( <b>Scheme 2</b> )                                                              | S11  |
| 9. Reference                                                                                              | S11  |
| 10. NMR Spectra                                                                                           | S13  |
| 11. HPLC Spectra                                                                                          | S116 |

## Method and Materials

**General.** Unless otherwise stated, reactions were performed using freshly purified solvents which were purified using solvent purification columns purchased from Glass Contour, Laguna Beach, CA. All reactions were monitored by thin-layer chromatography with E. Merck silica gel 60 F254 pre-coated plates (0.25 mm). Gas chromatography (GC) was performed on an HP 6890N autosampling GC with an HP-5 capillary column and equipped with a FID detector. Flash chromatography was performed with indicated solvents using silica gel (particle size 0.032-0.063m) purchased from Sorbent Technologies.  $^1\text{H}$  and  $^{13}\text{C}$  NMR spectra were recorded on Varian Inova-400 MHz or 500 MHz spectrometer. Chemical shift are reported relative to internal chloroform ( $\text{CDCl}_3$ :  $^1\text{H}$ ,  $\delta = 7.27$ ,  $^{13}\text{C}$ ,  $\delta = 77.26$ ). Coupling constants are in Hz and are reported as d (doublet), t (triplet), q (quartet). For signals having multiple coupling patterns, the coupling constant are listed in the same order as the pattern (e.g. dt,  $J = 2.0, 4.0$ ; 2.0 is the coupling constant for the doublet and 4.0 is for the coupling constant for the triplet). HPLC analyses were carried out on a Shimadzu LC-2010A system. Optical rotations were measured on a Rudolph Research Analytical Autopol® IV Polarimeter (50/60 Hz). Mass spectra were acquired on a Shimadzu QP5000 GC/MS or Agilent technologies 1200 series LC/MS using indicated ionization methods.

**Materials.** (*1R, 2S, 5R*)-(-)-Menthyl-(*S*)-*p*-toluenesulfinate was prepared according to Klunder and Sharpless.<sup>1</sup> Other chemicals were purchased from Aldrich and used without purification.

### Preparation of (*S*)-Sulfoxide starting materials.

**General Procedure 1.** Synthesis of substrates from dimethyl acetals.

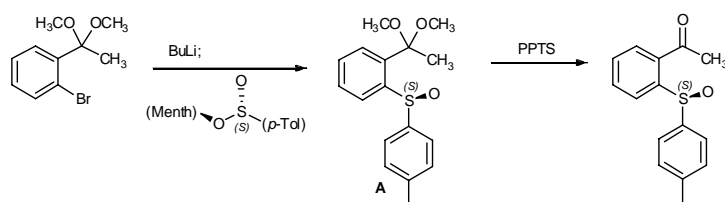

**(*S*)-1-(2-(*p*-tolylsulfinyl)phenyl)ethanone 1a.**<sup>2</sup> To a solution of 1-bromo-2-(1,1-dimethoxyethyl)benzene (9.0 mmol, 2.20 g, 1.1 equiv.) in  $\text{Et}_2\text{O}$  (40 mL) was added *n*-butyllithium (9.0 mmol, 5.6 mL, 1.6 M solution in hexanes, 1.1 equiv) at  $-78^\circ\text{C}$  and the reaction mixture was stirred for 30 min. A solution of (*1R, 2S, 5R*)-(-)-menthyl-(*S*)-*p*-toluenesulfinate (8.0 mmol, 2.36 g, 1.0 equiv) in a mixture of  $\text{Et}_2\text{O}$ /THF (1:1, 20 mL) was then added *via* canula. After stirring for 3 h, the reaction was quenched with saturated aqueous  $\text{NH}_4\text{Cl}$  and extracted with  $\text{EtOAc}$  (3X). The combined organic layers were dried over  $\text{MgSO}_4$ , filtered, and evaporated to give crude product, which was purified by flash chromatography (hexane/ $\text{EtOAc}$ , 70/30) to afford (*S*)-1-(1,1-dimethoxyethyl)-2-(*p*-tolylsulfinyl)benzene (acetal **A**) in 74 % yield (1.80 g).  $^1\text{H}$  NMR (400 MHz,  $\text{CDCl}_3$ )  $\delta$  8.26 (dd,  $J = 7.9, 1.1$ , 1H), 7.50 – 7.59 (m, 1H), 7.39 – 7.49 (m, 4H), 7.17 (d,  $J = 8.0$ , 2H), 3.12 (s, 3H), 3.04 (s, 3H), 2.32 (s, 3H), 1.36 (s, 3H); MS: EI-MS( $m/z$ ): 304 [ $\text{M}$ ]<sup>+</sup>.

(*S*)-1-(1,1-dimethoxyethyl)-2-(*p*-tolylsulfinyl)benzene (1.80g, 5.9 mmol) and PTSA (830 mg, 4.3 mmol) were dissolved in a mixture of acetone (130 mL) and water (9 mL). After being stirred for 2 h, the reaction mixture was concentrated under reduce pressure and extracted with  $\text{EtOAc}$ . The organic layers were dried over  $\text{MgSO}_4$ , filtered, and evaporated to give the product as a white solid in 86 % yield (1.32 g),  $[\alpha]_{\text{D}} = -132^\circ$  ( $c = 1.0$ ,  $\text{CHCl}_3$ ).  $^1\text{H}$  NMR (400 MHz,  $\text{CDCl}_3$ )  $\delta = 8.58$  (dd,  $J = 7.9, 0.8$ , 1H), 7.91 (d,  $J = 7.7$ , 1H), 7.86 (t,  $J = 7.7$ , 1H), 7.52 – 7.66 (m, 3H), 7.15 (d,  $J = 8.1$ , 2H), 2.55 (s, 3H), 2.30 (s, 3H).  $^{13}\text{C}$  NMR (101 MHz,  $\text{CDCl}_3$ )  $\delta$  197.8, 184.2, 148.5, 143.8, 141.2, 134.1, 130.9, 130.5, 129.7, 126.9, 125.4, 27.2, 21.6; MS: EI-MS( $m/z$ ): 258 [ $\text{M}$ ]<sup>+</sup>.

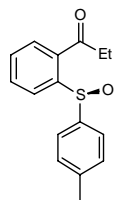

**(*S*)-1-(2-(*p*-tolylsulfinyl)phenyl)propan-1-one 1b.** According to General Procedure 1, (*S*)-1-(1,1-dimethoxypropyl)-2-(*p*-tolylsulfinyl)benzene was prepared in 72 % yield (2.06 g).  $^1\text{H}$  NMR (400 MHz,  $\text{CDCl}_3$ )  $\delta$  8.31 (dd,  $J = 8.0, 1.2$ , 1H), 7.52 – 7.58 (m, 1H), 7.44 – 4.78 (m, 3H), 7.34 – 7.40 (m, 1H), 7.16 (d,  $J = 8.0$ , 2H), 3.10 (s, 3H), 2.87 (s, 3H), 2.32 (s, 3H), 2.09 (dq,  $J = 14.5, 7.4$ , 1H), 1.77 (dq,  $J = 15.1, 7.6$ , 1H), 0.61 (t,  $J = 7.5$ , 3H);  $^{13}\text{C}$  NMR (101 MHz,  $\text{CDCl}_3$ )  $\delta$  145.4, 144.9, 140.6, 138.8, 130.4, 129.7, 129.2, 128.1, 126.2, 125.7, 106.1, 49.7, 47.5, 30.5, 21.5, 7.9; MS: EI-MS( $m/z$ ):318 [ $\text{M}$ ]<sup>+</sup>.

The title ketone was prepared as a white solid in 85 % yield (1.38 g),  $[\alpha]_{\text{D}} = -167^\circ$ ,  $c = 1.0$  in  $\text{CHCl}_3$ .  $^1\text{H}$  NMR (400 MHz,  $\text{CDCl}_3$ )  $\delta$  8.55 (d,  $J = 7.9$ , 1H), 7.90 (d,  $J = 7.7$ , 1H), 7.82 (t,  $J = 7.6$ , 1H), 7.62 (d,  $J = 8.2$ , 2H), 7.57 (t,  $J = 7.5$ , 1H), 7.15 (d,  $J = 8.0$ , 2H), 2.77 – 3.19 (m, 2H), 2.30 (s, 3H), 1.14 (t,  $J = 7.2$ , 3H);  $^{13}\text{C}$  NMR (101 MHz,  $\text{CDCl}_3$ )  $\delta$  192.4, 140.4, 135.8, 132.9, 125.9, 125.5, 122.3, 121.6, 121.48, 118.6, 117.1, 24.2, 13.4, 13.3; MS: EI-MS( $m/z$ ): 272 [ $\text{M}$ ]<sup>+</sup>.

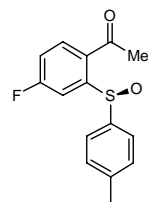

**(*S*)-1-(4-fluoro-2-(*p*-tolylsulfinyl)phenyl)ethanone 1c.** According to General Procedure 1 (*S*)-1-(1,1-dimethoxyethyl)-4-fluoro-2-(*p*-tolylsulfinyl)benzene was prepared in 74 % yield (1.81 g).  $^1\text{H}$  NMR (400 MHz,  $\text{CDCl}_3$ )  $\delta$  8.03 (dd,  $J = 9.2, 2.7$ , 1H), 7.43 – 7.48 (m, 2H), 7.40 (dd,  $J = 8.6, 5.3$ , 1H), 7.19 (dd,  $J = 8.5$ ,

0.5, 2H), 7.13 (ddd,  $J = 8.6, 7.4, 2.7$ , 1H), 3.10 (s, 3H), 3.03 (s, 3H), 2.34 (s, 3H), 1.29 (s, 3H);  $^{13}\text{C}$  NMR (101 MHz,  $\text{CDCl}_3$ )  $\delta$  164.8 ( $J_{\text{FC}} = 252$  Hz), 146.9, 144.2, 141.3, 136.7, 129.9, 129.6, 126.5, 117.8 ( $J_{\text{FC}} = 21.75$  Hz), 112.9 ( $J_{\text{FC}} = 24.9$  Hz), 49.0, 48.4, 25.7, 21.5; MS: EI-MS( $m/z$ ): 322 [ $\text{M}$ ] $^+$

The title ketone was prepared as a white solid in 82 % yield (1.20 g),  $[\alpha]_{\text{D}} = -85^\circ$  ( $c = 1.0$ ,  $\text{CHCl}_3$ ).  $^1\text{H}$  NMR (400 MHz,  $\text{CDCl}_3$ )  $\delta$  8.32 (dd,  $J = 8.9$  Hz, 2.6 Hz, 1H), 7.93 (dd,  $J = 8.5$  Hz, 5.0 Hz, 1H), 7.61 (d,  $J = 8.3$  Hz, 2H), 7.21 – 7.29 (m, 1H), 7.17 (d,  $J = 8.0$  Hz, 2H), 2.53 (s, 3H), 2.31 (s, 3H).  $^{13}\text{C}$  NMR (101 MHz,  $\text{CDCl}_3$ )  $\delta$  196.3, 166.1 ( $J_{\text{FC}} = 209$  Hz), 153.1, 143.3, 141.5, 133.7 ( $J_{\text{FC}} = 8.7$  Hz), 130.4, ( $J_{\text{FC}} = 3.3$  Hz), 129.8, 126.9, 117.4 ( $J_{\text{FC}} = 22$  Hz), 113.1 ( $J_{\text{FC}} = 25$  Hz), 27.1, 21.5; MS: EI-MS( $m/z$ ): 276 [ $\text{M}$ ] $^+$ .

## General Procedure 2. Synthesis of substrates from secondary alcohols

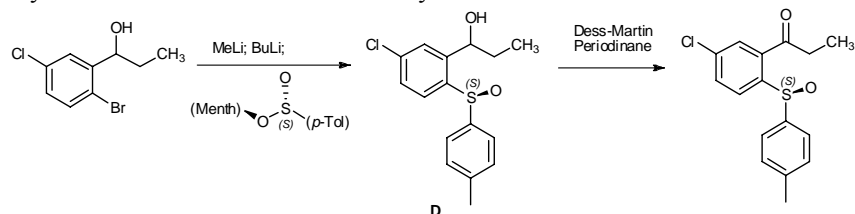

**(S)-1-(5-chloro-2-(*p*-tolylsulfinyl)phenyl)propan-1-one 1d.** To a solution of 1-(2-bromo-5-chlorophenyl)propan-1-ol (4.05 mmol, 1.00 g, 1.0 equiv.) in  $\text{Et}_2\text{O}$  (30 mL) was added MeLi (4.85 mmol, 3.0 mL, 1.6 M solution in  $\text{Et}_2\text{O}$ , 1.2 equiv) at  $-78^\circ\text{C}$ . After the reaction mixture stirred for 15 min at  $-78^\circ\text{C}$ , *tert*-BuLi (8.0 mmol, 4.7 mL, 1.7 M solution in pentane, 2.0 equiv.) was added and stirring was continued for 30 min at this same temperature. A solution of (*1R,2S,5R*)-(-)-menthyl-(*S*)-*p*-toluenesulfinate (4.82 mmol, 1.42 g, 1.2 equiv) in a mixture of  $\text{Et}_2\text{O}/\text{THF}$  (3:1, 20 mL) was then added *via* canula. After stirring for 3 h, the reaction was quenched with saturated aqueous  $\text{NH}_4\text{Cl}$  and extracted with  $\text{EtOAc}$  (3X). The combined organic layers were dried over  $\text{MgSO}_4$ , filtered, and evaporated to give a crude product, which was purified by flash chromatography (hexane/ $\text{EtOAc}$ , 80/20) to afford (*S*)-1-(5-chloro-2-(*p*-tolylsulfinyl)phenyl)propan-1-ol **D** as a mixture of diastereoisomers (1:1) in 72 % yield (900 mg).  $^1\text{H}$  NMR (400 MHz,  $\text{CDCl}_3$ )  $\delta$  7.68 – 7.78 (m, 0.5H), 7.55 – 7.63 (m, 0.5H), 7.45 (s, 3H), 7.29 – 7.36 (m, 0.5H), 7.19 (s, 2.5H), 4.85 – 4.96 (m, 1H), 2.33 (s, 3H), 1.60 – 1.71 (m, 1H), 1.38 – 1.55 (m, 0.5H), 0.98 – 1.14 (m, 0.5H), 0.88 – 0.90 (m, 1.5H), 0.77 – 0.87 (s, 1.5H);  $^{13}\text{C}$  NMR (101 MHz,  $\text{CDCl}_3$ )  $\delta$  146.2, 145.7, 142.6, 141.8, 141.5, 141.1, 140.7, 139.2, 137.9, 137.8, 130.3, 130.2, 128.7, 128.6, 127.4, 127.1, 127.0, 126.5, 125.8, 125.6, 70.9, 70.0, 31.5, 31.3, 21.6, 21.6, 10.6, 10.5; MS: EI-MS( $m/z$ ): 291 [ $\text{M} - \text{OH}$ ] $^+$ .

To a solution of (*Ss*)-1-(5-chloro-2-(*p*-tolylsulfinyl)phenyl)propan-1-ol (2.60 mmol, 800 mg, 1.0 equiv.) in dichloromethane (35 mL) was added DMP (3.90, 1.65 g, 1.5 equiv.) at  $0^\circ\text{C}$ . After stirring for 1 h at rt, the reaction mixture was successively washed with a 20% aqueous sodium thiosulfate solution, saturated aqueous sodium bicarbonate and then dried over magnesium sulfate, filtered and concentrated under vacuum to give crude product, which was purified by flash chromatography (hexane/ $\text{EtOAc}$ , 80/20) to afford (*S*)-1-(5-chloro-2-(*p*-tolylsulfinyl)phenyl)propan-1-one in 80 % yield (640 mg),  $[\alpha]_{\text{D}} = -137^\circ$  ( $c = 1.0$ ,  $\text{CHCl}_3$ ).  $^1\text{H}$  NMR (400 MHz,  $\text{CDCl}_3$ )  $\delta$  8.47 (d,  $J = 8.5$  Hz, 1H), 7.82 (s, 1H), 7.77 (d,  $J = 8.4$  Hz, 1H), 7.60 (d,  $J = 8.1$  Hz, 2H), 7.16 (d,  $J = 8.0$  Hz, 2H), 2.84-3.02 (m, 2H), 2.31 (s, 3H), 1.13 (t,  $J = 7.2$  Hz, 3H);  $^{13}\text{C}$  NMR (101 MHz,  $\text{CDCl}_3$ )  $\delta$  199.5, 147.5, 143.8, 141.3, 136.8, 135.8, 133.4, 129.7, 129.5, 127.0, 126.6, 32.7, 21.4, 8.0; MS: EI-MS( $m/z$ ): 306 [ $\text{M}$ ] $^+$ .

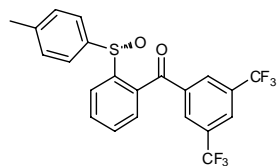

**(S)-(3,5-bis(trifluoromethyl)phenyl)(2-(*p*-tolylsulfinyl)phenyl)methanone 1e.** According to General Procedure 2, (*S*)-(3,5-bis(trifluoromethyl)phenyl)(2-(*p*-tolylsulfinyl)phenyl)methanol was prepared as a mixture of diastereoisomers (1:1) in 74 % yield (900 mg).  $^1\text{H}$  NMR (400 MHz,  $\text{CDCl}_3$ )  $\delta$  7.81 – 7.87 (m, 0.5H), 7.76 (dd,  $J = 7.8$  Hz, 1.2 Hz, 0.5H), 7.70 (s, 0.5H), 7.62 (s, 0.5H), 7.42 – 7.51 (m, 3H), 7.35 – 7.42 (m, 2H), 7.32 (dd,  $J = 7.6$  Hz, 1.3, 0.5H), 7.30 – 7.19 (m, 2H), 7.11 (d,  $J = 8.0$  Hz, 1H), 6.94 – 6.99 (m, 0.5H), 6.34 (s, 0.5H), 6.32 (s, 0.5H), 4.88 (s, 0.5H),

4.46 (s, 0.5H), 2.34 (s, 1.5H), 2.3 (s, 1.5H); MS: EI-MS( $m/z$ ): 458 [ $\text{M}$ ] $^+$ .

The title ketone was prepared in 77 % yield (688 mg),  $[\alpha]_{\text{D}} = -68^\circ$  ( $c = 1.5$ ,  $\text{CHCl}_3$ ).  $^1\text{H}$  NMR (400 MHz,  $\text{CDCl}_3$ )  $\delta$  8.44 (d,  $J = 7.9$  Hz, 1H), 8.07 (s, 1H), 8.03 (s, 2H), 7.87 (t,  $J = 7.6$  Hz, 1H), 7.56 – 7.61 (m, 3H), 7.44 (d,  $J = 7.5$  Hz, 1H), 7.15 (d,  $J = 8.0$  Hz, 2H), 2.27 (s, 3H).  $^{13}\text{C}$  NMR (101 MHz,  $\text{CDCl}_3$ )  $\delta$  192.60, 149.5, 142.5, 142.1, 136.7, 134.4, 133.8, 132.4 (q,  $J_{\text{FC}} = 34.1$  Hz), 130.4, 130.0, 126.8, 126.5 (sep,  $J_{\text{CF}} = 3.6$  Hz), 126.2, 122.9 (q,  $J_{\text{FC}} = 273.1$  Hz), 21.4; MS: EI-MS( $m/z$ ): 456 [ $\text{M}$ ] $^+$ .

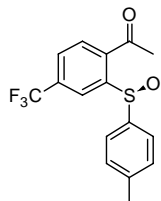

**(S)-1-(4'-trifluoromethyl-2'-(*p*-tolylsulfinyl)phenyl)ethanone 1f.** To a stirred solution of 4-trifluoromethylbenzaldehyde (578mg, 3.32mmol) in anhydrous THF (3ml) at  $0^\circ\text{C}$  under  $\text{N}_2$  was added MeLi solution (2.75ml, 1.33M in  $\text{Et}_2\text{O}$ ). The so formed solution was stirred for another 30 min before a BuLi·TMEDA solution was added. The BuLi·TMEDA solution was made by adding TMEDA (77mg, 0.66mmol) to a BuLi solution (4.3ml, 1.7M in hexanes) at rt and stirring for 30 min. After being stirred at  $0^\circ\text{C}$  for 30 min then rt overnight, the resulting solution was transferred into a solution of (*1R,2S,5R*)-(-)

Menthyl (*S*)-*p*-toluenesulfinate in anhydrous THF (40ml) at -78 °C under N<sub>2</sub>. The thus formed reaction was stirred overnight. Sat. NH<sub>4</sub>Cl aq. was added to quench the reaction. The water layer was extracted by CH<sub>2</sub>Cl<sub>2</sub>. The combined organic layer was concentrated under reduced pressure and the residue was purified by silica gel chromatography (hexane/ethyl acetate, 3/1-1/1) to afford secondary alcohol.

To a solution of (*Ss*)-1-(4'-trifluoromethyl-2'-(*p*-tolylsulfinyl)phenyl)ethanol (218mg, 0.67mmol) in CH<sub>2</sub>Cl<sub>2</sub> (4ml) was added Dess-Martin periodinane (310mg, 0.73mmol). The resulting reaction mixture was stirred at rt for 3h. A 1:1 mixture of 15% Na<sub>2</sub>S<sub>2</sub>O<sub>3</sub> aq. and sat. NaHCO<sub>3</sub> aq. was added to quench the reaction. The water layer was extracted by CH<sub>2</sub>Cl<sub>2</sub>. The combined organic layer was concentrated under reduced pressure and the residue was purified by silica gel chromatography (hexane/ethyl acetate, 3/1) to afford the title compound in 92% yield (200mg). [ $\alpha$ ]<sub>D</sub> +145° (c = 0.4, CHCl<sub>3</sub>); <sup>1</sup>H NMR (500 MHz, CDCl<sub>3</sub>)  $\delta$ : 8.84 (s, 1H), 8.04 (d, *J* = 8.0 Hz, 1H), 7.83 (d, *J* = 8.0 Hz, 1H), 7.58 (d, *J* = 9.0 Hz, 2H), 7.15 (d, *J* = 9.0 Hz, 2H), 2.58 (s, 3H), 2.29 (s, 3H); <sup>13</sup>C NMR (125 MHz, CDCl<sub>3</sub>)  $\delta$ : 197.2, 150.6, 143.1, 141.8, 136.5, 135.5 (q, *J* = 33.0 Hz), 131.3, 129.9, 127.6, 126.9, 123.4 (q, *J* = 272.0 Hz), 122.6, 27.4, 21.5. EI-MS (*m/z*): 326 [M]<sup>+</sup>.

### General procedure for the addition of alkynyl-cerium to sulfinyl ketones 1.

A flame-dried, 10 mL, round-bottomed flask was charged with anhydrous cerium chloride (0.91 mmol, 222 mg, 2.20 equiv) in an inert-atmosphere glovebox (cerium chloride was dried in vacuo overnight at 140 °C and stored in the glovebox). The sealed flask was taken out of the glovebox and charged with dry THF (2 mL) under nitrogen atmosphere. After being stirred for 2 h at rt, the resulting suspension was cooled to -78 °C. Separately, the alkynyllithium (0.80 mmol, 1.94 equiv) was prepared by adding *n*-butyllithium (0.80 mmol, 500  $\mu$ L, 1.6 M solution in hexanes, 1.94 equiv) to a solution of alkyne (0.82 mmol, 2.0 eq) in dry THF (2 mL) at -78 °C and stirring for 30 min. The alkynyl lithium solution was added via canula to the suspension of CeCl<sub>3</sub>. The reaction mixture was stirred for 30 min at -78 °C and a solution of (*S*)-sulfoxide (0.41 mmol, 105 mg, 1.0 equiv) in dry THF (2 mL) was added. After 3 h at -78 °C, the reaction mixture was treated with saturated aqueous NH<sub>4</sub>Cl, filtered through Celite, and extracted with EtOAc (3X). The combined organic layers were dried over MgSO<sub>4</sub>, filtered, and evaporated to give crude product, which was purified as indicated for individual examples.

### General procedure for the addition of aryl-, and alkenylmagnesium bromide to sulfinyl ketones 1.

To a solution of (*S*)-sulfinyl ketone 4 (0.39 mmol, 100 mg, 1.0 equiv) in dry THF (5 mL) at -78 °C was added RMgBr (0.78 mmol, 2.0 equiv). After being stirred for 3 h at -78 °C, saturated aqueous NH<sub>4</sub>Cl was added, followed by extraction with EtOAc (3X). The combined organic layers were dried over MgSO<sub>4</sub>, filtered, and evaporated to give crude product, which was purified as indicated below for individual examples.

**Table 2, Entry 1. (*Ss, R*)-4-Phenyl-2-(2-(*p*-tolylsulfinyl)phenyl)but-3-yn-2-ol.** The title compound was prepared from (*S*)-1-(2-(*p*-tolylsulfinyl)phenyl)ethanone (0.41 mmol, 105 mg, 1.0 equiv) and phenylethyneyllithium. <sup>1</sup>H NMR analysis of crude product indicated 100 % conversion and d.r. = 50:1. To improve the diastereomeric ratio, the crude product was suspended in a mixture of hexane/EtOAc (10:1) and filtered to give (*Ss, R*) – isomer in 95 % yield (140 mg), d.r. > 50:1, [ $\alpha$ ]<sub>D</sub> = -278°, (c = 0.5, CHCl<sub>3</sub>). <sup>1</sup>H NMR (400 MHz, CDCl<sub>3</sub>)  $\delta$  8.03 – 8.07 (m, 1H), 7.64 – 7.70 (m, 1H), 7.52 (d, *J* = 8.2 Hz, 2 H), 7.41 – 7.47 (m, 2 H), 7.37 (d, *J* = 7.6 Hz, 1 H), 7.38 (d, *J* = 8.0 Hz, 1H), 7.23 – 7.30 (m, 3 H), 7.14 (d, *J* = 8.0 Hz, 2 H), 3.36 (bs, 1 H), 2.31 (s, 3 H), 1.74 (s, 3 H); <sup>13</sup>C NMR (101 MHz, CDCl<sub>3</sub>)  $\delta$  144.2, 143.4, 143.3, 140.9, 131.9, 130.7, 129.6, 128.9, 128.7, 128.4, 126.9, 126.6, 122.7, 93.6, 85.2, 70.7, 32.9, 21.4; MS:LC-APCI-MS (*m/z*): 343 [M-OH]<sup>+</sup>.

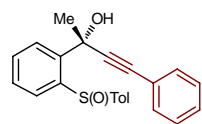

Single crystals suitable for X-ray crystallography were grown cooling a hot solution in hexane/EtOAc (1:1).

**Table 2, Entry 2. (*Ss, R*)-4-(*o*-tolyl)-2-(2-(*p*-tolylsulfinyl)phenyl)but-3-yn-2-ol.** The title compound was prepared from (*S*)-1-(2-(*p*-tolylsulfinyl)phenyl)ethanone (0.41 mmol, 105 mg, 1.0 equiv) and *o*-tolylethyneyllithium. <sup>1</sup>H NMR analysis of crude product indicated 97 % conversion and d.r. = 50:1. Purification by flash chromatography afforded pure product (d.r. = 50:1). To improve the diastereomeric ratio, the product was suspended in a mixture of hexane/EtOAc (10:1) and filtered to give (*Ss, R*) – isomer in 88 % yield (135 mg), d.r. > 50:1, [ $\alpha$ ]<sub>D</sub> = -251°, (c = 1.0, CHCl<sub>3</sub>). <sup>1</sup>H NMR (400 MHz, CDCl<sub>3</sub>)  $\delta$  8.08 – 8.11 (m, 1H), 7.67 – 7.70 (m, 1H), 7.53 (d, *J* = 8.0 Hz, 2 H), 7.43 – 7.45 (m, 2H), 7.35 (d, *J* = 7.6 Hz, 1 H), 7.07 – 7.21 (m, 5 H), 3.43 (s, 1 H), 2.39 (s, 3 H), 2.30 (s, 3 H), 1.71 (s, 3 H). <sup>13</sup>C NMR (101 MHz, CDCl<sub>3</sub>)  $\delta$  144.1, 143.4, 143.3, 141.1, 140.6, 132.3, 130.6, 129.7, 129.6, 128.8, 128.8, 127.0, 126.8, 126.4, 125.8, 122.3, 97.2, 84.3, 71.3, 32.7, 21.5, 21.0; MS:LC-APCI-MS (*m/z*): 357 [M-OH]<sup>+</sup>.

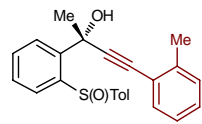

Single crystals suitable for X-ray crystallography were grown cooling a hot solution in hexane/EtOAc (1:1).

**Table 2, Entry 3 (*Ss, R*)-(6-methoxynaphthalen-2-yl)-2-(2-(*p*-tolylsulfinyl)phenyl) but-3-yn-2-ol.** The title compound was prepared from (*S*)-1-(2-(*p*-tolylsulfinyl)phenyl)ethanone (0.41 mmol, 105 mg, 1.0 equiv) and (6-methoxynaphthalen-2-yl)ethynyllithium. <sup>1</sup>H NMR analysis of

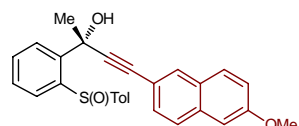

crude product indicated 92 % conversion and d.r. = 20:1. Purification by flash chromatography afforded pure product (d.r. = 20:1). To improve the diastereomeric ratio, the product was suspended in a mixture of hexane/EtOAc (10:1) and filtered to give (*S*, *R*) – isomer in 81 % yield (146 mg), d.r. > 50:1,  $[\alpha]_D = -236^\circ$ , ( $c = 1.0$ ,  $\text{CHCl}_3$ ).  $^1\text{H NMR}$  (400 MHz,  $\text{CDCl}_3$ )  $\delta$  8.05 – 8.07 (m, 1 H), 7.77 (s, 1 H), 7.70 – 7.72 (m, 1 H), 7.59 – 7.63 (m, 2 H), 7.53 (d,  $J = 8.0$  Hz, 2 H), 7.44 – 7.46 (m, 2 H), 7.37 (d,  $J = 8.8$  Hz, 1 H), 7.11 – 7.31 (m, 3 H), 7.06 (s, 1 H), 3.90 (s, 3 H), 3.41 (s, 1 H), 2.27 (s, 3 H), 1.79 (s, 3 H);  $^{13}\text{C NMR}$  (101 MHz,  $\text{CDCl}_3$ )  $\delta$  158.5, 144.2, 143.6, 143.4, 140.8, 134.4, 131.8, 130.9, 129.7, 129.6, 129.2, 129.0, 128.5, 126.9, 126.9, 126.8, 126.4, 119.6, 117.4, 105.9, 92.9, 86.1, 70.7, 55.5, 32.6, 21.5; MS: LC-APCI-MS ( $m/z$ ): 423  $[\text{M-OH}]^+$ .

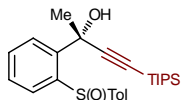

**Table 2, Entry 4. (*S*, *R*)-2-(2-(*p*-tolylsulfinyl)phenyl)-4-(triisopropylsilyl)but-3-yn-2-ol.** The title compound was prepared from (*S*)-1-(2-(*p*-tolylsulfinyl)phenyl)ethanone (0.41 mmol, 105 mg, 1.0 equiv) and ((triisopropylsilyl)ethynyl)lithium.  $^1\text{H NMR}$  analysis of crude product indicated 100 % conversion and d.r. > 50:1. Purification by flash chromatography afforded pure (*S*, *R*) – isomer (d.r. > 50:1) in 87 % yield (157 mg),  $[\alpha]_D = -124^\circ$ , ( $c = 1.0$ ,  $\text{CHCl}_3$ ).  $^1\text{H NMR}$  (400 MHz,  $\text{CDCl}_3$ )  $\delta$  8.13 (dd,  $J = 7.6$  Hz, 1.6 Hz, 1H), 7.62 (d,  $J = 7.2$  Hz, 1H), 7.53 (d,  $J = 8.2$  Hz, 2H), 7.34 – 7.46 (m, 3H), 7.17 (d,  $J = 8.1$  Hz, 2H), 3.23 (bs, 1H), 2.33 (s, 3H), 1.47 (s, 3 H), 1.02 – 1.08 (m, 21 H);  $^{13}\text{C NMR}$  (101 MHz,  $\text{CDCl}_3$ )  $\delta$  143.8, 143.4, 141.2, 142.8, 130.3, 129.7, 128.6, 127.5, 127.3, 125.5, 111.5, 85.8, 72.0, 33.0, 21.6, 18.8, 11.4; MS: LC-APCI-MS ( $m/z$ ): 423  $[\text{M-OH}]^+$ .

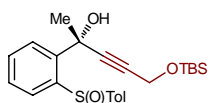

**Table 2, Entry 5 (*S*, *R*)-5-((tert-butyl)dimethylsilyloxy)-2-(2-(*p*-tolylsulfinyl)phenyl)pent-3-yn-2-ol.** The title compound was prepared from (*S*)-1-(2-(*p*-tolylsulfinyl)phenyl)ethanone (0.41 mmol, 105 mg, 1.0 equiv) and (3-((tert-butyl)dimethylsilyloxy)prop-1-yn-1-yl)lithium.  $^1\text{H NMR}$  analysis of crude product indicated 85 % conversion and d.r. = 12:1. Purification by flash chromatography afforded pure product (d.r. = 33:1) in 65 % yield (114 mg),  $[\alpha]_D = -151^\circ$ , ( $c = 0.5$ ,  $\text{CHCl}_3$ ).  $^1\text{H NMR}$  (400 MHz,  $\text{CDCl}_3$ )  $\delta$  7.97 (dm,  $J = 7.4$  Hz, 1H), 7.52 (dm,  $J = 7.3$  Hz, 1H), 7.43 (d,  $J = 8.2$  Hz, 2H), 7.36 (td,  $J = 7.3$  Hz, 1.7 Hz, 1H), 7.33 (td,  $J = 1.7, 7.3$  Hz, 1H), 7.09 (d,  $J = 8.0$  Hz, 2H), 4.25 (d,  $J = 15.6$  Hz, 1H), 4.18 (d,  $J = 16$  Hz, 1H), 3.25 (s, 1H), 2.25 (s, 3H), 1.51 (s, 3 H), 0.80 (s, 9 H), 0.00 (s, 6H);  $^{13}\text{C NMR}$  (101 MHz,  $\text{CDCl}_3$ )  $\delta$  148.8, 148.4, 147.9, 145.9, 135.5, 134.5, 133.7, 131.9, 131.7, 131.1, 93.6, 88.81, 75.7, 56.9, 37.4, 30.9, 26.4, 23.4, 0.0; MS: LC-APCI-MS ( $m/z$ ): 411  $[\text{M-OH}]^+$ .

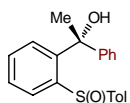

**Table 2, Entry 6. (*S*, *R*)-1-phenyl-1-(2-(*p*-tolylsulfinyl)phenyl)ethanol.** The title compound was prepared from (*S*)-1-(2-(*p*-tolylsulfinyl)phenyl)ethanone (0.39 mmol, 100 mg, 1.0 equiv.) and  $\text{PhMgBr}$  (0.78 mmol, 0.78 mL, 1.0 M solution in THF, 2.0 equiv.).  $^1\text{H NMR}$  analysis of crude product indicated 93% conversion and d.r. > 50:1. Purification by flash chromatography (hexane/EtOAc, 80/20) afforded pure (*S*, *R*) – isomer (d.r. > 50:1) in 83 % yield (108 mg),  $[\alpha]_D = -216^\circ$ , ( $c = 0.5$ ,  $\text{CHCl}_3$ ).  $^1\text{H NMR}$  (400 MHz,  $\text{CDCl}_3$ )  $\delta$  8.12 (dd,  $J = 7.3$  Hz, 1.0, 1H), 7.42 – 7.52 (m, 3H), 7.39 (d,  $J = 8.2$  Hz, 2H), 7.19 – 7.36 (m, 5H), 7.11 – 7.15 (m 2H), 2.78 (s, 1H), 2.32 (s, 3H), 1.88 (s, 3H);  $^{13}\text{C NMR}$  (101 MHz,  $\text{CDCl}_3$ )  $\delta$  147.6, 146.2, 144.7, 144.4, 140.6, 130.5, 129.6, 128.7, 128.5, 127.4, 127.0, 126.9, 126.3, 126.0, 77.5, 32.1, 21.5; MS: LC-APCI-MS ( $m/z$ ): 319  $[\text{M-OH}]^+$ .

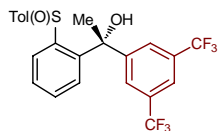

**Table 2, Entry 7. (*S*, *R*)-1-(3,5-bis(trifluoromethyl)phenyl)-1-(2-(*p*-tolylsulfinyl)phenyl)ethanol.** The title compound was prepared from (*S*)-1-(2-(*p*-tolylsulfinyl)phenyl)ethanone (0.39 mmol, 100 mg, 1.0 equiv.) and 3,5-bis(trifluoromethyl)phenylmagnesium bromide (0.78 mmol, 1.56 mL, 0.5 M solution in THF, 2.0 equiv).  $^1\text{H NMR}$  analysis of crude product indicated 91 % conversion and d.r. > 50:1. Purification by flash chromatography (hexane/EtOAc, 80/20) afforded pure (*S*, *R*) – isomer (d.r. > 50:1) in 82 % yield (150 mg),  $[\alpha]_D = -92^\circ$ , ( $c = 0.5$ ,  $\text{CHCl}_3$ ).  $^1\text{H NMR}$  (400 MHz,  $\text{CDCl}_3$ )  $\delta$  8.02 – 8.04 (m, 1H), 7.57 – 7.62 (m, 6H), 7.01 – 7.10 (m, 4 H), 4.87 (s, 1H), 2.27 (s, 3H), 1.84 (s, 3H);  $^{13}\text{C NMR}$  (101 MHz,  $\text{CDCl}_3$ )  $\delta$  150.6, 145.1, 143.6, 142.2, 140.8, 131.4 (q,  $J_{\text{CF}} = 33.7$  Hz), 129.7, 129.1, 128.1, 127.2, 126.4, 126.1, 125.7, 123.5 (q,  $J_{\text{CF}} = 272$  Hz), 121.7 (sep,  $J_{\text{CF}} = 3.6$  Hz), 76.5, 32.4, 21.3; MS: LC-APCI-MS ( $m/z$ ): 455  $[\text{M-OH}]^+$ .

Single crystals suitable for X-ray crystallography were grown by cooling a hot solution in hexane/EtOAc (1:1)

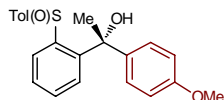

**Table 2, Entry 8. (*S*, *R*)-1-(4-methoxyphenyl)-1-(2-(*p*-tolylsulfinyl)phenyl)ethanol.** The title compound was prepared from (*S*)-1-(2-(*p*-tolylsulfinyl)phenyl)ethanone (0.39 mmol, 100 mg, 1.0 equiv) and 4-Methoxyphenylmagnesium bromide (0.78 mmol, 1.56 mL, 0.5 M solution in THF, 2.0 equiv.).  $^1\text{H NMR}$  analysis of crude product indicated 94 % conversion and d.r. > 50:1. Purification by flash chromatography (hexane/EtOAc, 80/20) afforded pure (*S*, *R*) – isomer (d.r. > 50:1) in 87 % yield (124 mg),  $[\alpha]_D = -205^\circ$ , ( $c = 0.5$ ,  $\text{CHCl}_3$ ).  $^1\text{H NMR}$  (400 MHz,  $\text{CDCl}_3$ )  $\delta$  8.13 (d,  $J = 7.5$  Hz, 1H), 7.40 – 7.53 (m, 3H), 7.37 (d,  $J = 8.3$  Hz, 2H), 7.20 – 7.7.22 (m, 2H), 7.13 (d,  $J = 8.0$  Hz, 2H), 6.76 – 6.78 (m, 2H), 3.76 (s, 3H), 2.74 (bs, 1H), 2.32 (s, 3H), 1.86 (s, 3H);  $^{13}\text{C NMR}$  (101 MHz,  $\text{CDCl}_3$ )  $\delta$  159.8, 145.3, 141.6, 140.8, 132.4, 130.9, 130.8, 129.8, 129.0, 128.2, 127.3, 126.3, 124.7, 116.5, 113.9, 77.4, 55.5, 21.6; MS: LC-APCI-MS ( $m/z$ ): 349  $[\text{M-OH}]^+$ .

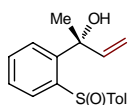

**Table 2, Entry 9. (Ss, R)-2-(2-(p-tolylsulfinyl)phenyl)but-3-en-2-ol.** The title compound was prepared from (S)-1-(2-(p-tolylsulfinyl)phenyl)ethanone (0.39 mmol, 100 mg, 1.0 equiv) and vinylmagnesium bromide (0.78 mmol, 0.78 mL, 1.0 M solution in THF, 2.0 equiv.). <sup>1</sup>H NMR analysis of crude product indicated 98 % conversion and d.r. > 50:1. Purification by flash chromatography (hexane/EtOAc, 80/20) afforded pure (Ss, R) – isomer (d.r. > 50:1) in 74 % yield (83 mg),  $[\alpha]_D = -148^\circ$ , (c = 0.5, CHCl<sub>3</sub>). <sup>1</sup>H NMR (400 MHz, CDCl<sub>3</sub>)  $\delta$  8.14 (d, *J* = 7.7 Hz, 1H), 7.54 (d, *J* = 8.2 Hz, 2H), 7.43 (td, *J* = 7.4 Hz, 1.2 Hz, 1H), 7.38 (td, *J* = 7.4 Hz, 1.4 Hz, 1H), 7.24 – 7.30 (m, 1H), 7.16 (d, *J* = 8.1 Hz, 2H), 6.22 (dd, *J* = 17 Hz, 10 Hz, 1H), 5.18 (d, *J* = 4.7 Hz, 1H), 5.15 (d, *J* = 1.4 Hz, 1H), 2.70 (bs, 1H), 2.32 (s, 3H), 1.53 (s, 3H); <sup>13</sup>C NMR (101 MHz, CDCl<sub>3</sub>)  $\delta$  144.8, 144.5, 144.2, 140.7, 130.4, 129.7, 128.5, 126.7, 126.6, 126.4, 113.9, 76.8, 29.4, 21.5; MS: LC-APCI-MS (*m/z*): 269 [M-OH]<sup>+</sup>.

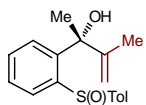

**Table 2, Entry 10. (Ss, R)-3-methyl-2-(2-(p-tolylsulfinyl)phenyl)but-3-en-2-ol.** The title compound was prepared from (S)-1-(2-(p-tolylsulfinyl)phenyl)ethanone (0.39 mmol, 100 mg, 1.0 equiv) and isopropenylmagnesium bromide (0.78 mmol, 1.56 mL, 0.5 M solution in THF, 2.0 eq). <sup>1</sup>H NMR analysis of crude product indicated 96 % conversion and d.r. > 33:1. Purification by flash chromatography afforded pure product (d.r. = 33:1). To improve the diastereomeric ratio, the product was suspended in a mixture of hexane/EtOAc (10:1) and filtered to give (Ss, R) – isomer in 90 % yield (105 mg), d.r. > 50:1,  $[\alpha]_D = -153^\circ$ , (c = 0.5, CHCl<sub>3</sub>). <sup>1</sup>H NMR (400 MHz, CDCl<sub>3</sub>)  $\delta$  8.16 (dd, *J* = 7.8 Hz, 1.4 Hz, 1H), 7.54 (d, *J* = 8.2 Hz, 2H), 7.46 (td, *J* = 7.6 Hz, 1.4 Hz, 1H), 7.39 (td, *J* = 7.5 Hz, 1.5 Hz, 1H), 7.31 (dd, *J* = 7.7 Hz, 1.4 Hz, 1H), 7.17 (d, *J* = 8.0 Hz, 2H), 4.97 (t, *J* = 1.2 Hz, 1H), 4.94 (s, 1H), 2.42 (s, 1H), 2.33 (s, 3H), 1.73 (s, 3H), 1.59 (s, 3H); <sup>13</sup>C NMR (101 MHz, CDCl<sub>3</sub>)  $\delta$  150.2, 145.0, 144.7, 144.4, 140.6, 130.4, 129.7, 128.5, 126.8, 126.7, 126.5, 112.5, 78.9, 29.3, 21.5, 19.2; MS: EI-MS (*m/z*): 300 [M]<sup>+</sup>, 283 [M-OH]<sup>+</sup>.

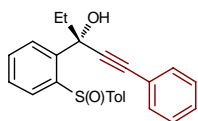

**Table 3, Entry 11. (Ss, R)-1-phenyl-3-(2-(p-tolylsulfinyl)phenyl)pent-1-yn-3-ol** The title compound was prepared from (S)-1-(2-(p-tolylsulfinyl)phenyl)propan-1-one (0.41 mmol, 112 mg, 1.0 equiv) and phenylethyneyllithium. <sup>1</sup>H NMR analysis of crude product indicated 90 % conversion and d.r. = 11:1. Purification by flash chromatography afforded pure product (d.r. = 11:1). To improve the diastereomeric ratio, the product was suspended in a mixture of hexane/EtOAc (10:1) and filtered to give (Ss, R) – isomer in 72% yield (110 mg), d.r. > 50:1,  $[\alpha]_D = -253^\circ$ , (c = 0.5, CHCl<sub>3</sub>). <sup>1</sup>H NMR (400 MHz, CDCl<sub>3</sub>)  $\delta$  8.01 – 8.35 (m, 1H), 7.68 – 7.71 (m, 1H), 7.49 (d, *J* = 8.2 Hz, 2H), 7.40 – 7.43 (m, 2H), 7.35 (m, 2H), 7.23 – 7.27 (m, 3H), 7.13 (d, *J* = 8.0 Hz, 2H), 3.42 (s, 1H), 2.30 (s, 3H), 1.94 (dq, *J* = 14 Hz, 7.3 Hz, 1H), 1.75 (dq, *J* = 14 Hz, 7.3 Hz, 1H), 1.03 (t, *J* = 7.3 Hz, 3H); <sup>13</sup>C NMR (101 MHz, CDCl<sub>3</sub>)  $\delta$  143.9, 143.4, 143.3, 140.9, 131.9, 130.6, 129.6, 128.8, 128.7, 128.4, 127.3, 126.8, 126.8, 122.6, 92.12, 86.6, 74.7, 37.5, 21.5, 9.0; MS: LC-APCI-MS (*m/z*): 357 [M-OH]<sup>+</sup>.

Single crystals suitable for X-ray crystallography were grown by cooling a hot solution in hexane/EtOAc (1:1)

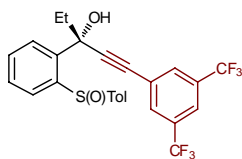

**Table 2, Entry 12. (Ss, R)-1-(3,5-bis(trifluoromethyl)phenyl)-3-(2-(p-tolylsulfinyl)phenyl)pent-1-yn-3-ol.** The title compound was prepared from (S)-1-(2-(p-tolylsulfinyl)phenyl)propan-1-one (0.41 mmol, 112 mg, 1.0 equiv) and ((3,5-bis(trifluoromethyl)phenyl)ethynyl)lithium. <sup>1</sup>H NMR analysis of crude product indicated 96 % conversion and d.r. = 14:1. Purification by flash chromatography afforded pure product (d.r. = 14:1). To improve the diastereomeric ratio, the product was suspended in a mixture of hexane/EtOAc (10:1) and filtered to give (Ss, R) – isomer in 81% yield (170 mg), d.r. > 50:1,  $[\alpha]_D = -153^\circ$ , (c = 0.5, CHCl<sub>3</sub>). <sup>1</sup>H NMR (400 MHz, CDCl<sub>3</sub>)  $\delta$  7.95 – 8.00 (m, 1H), 7.76 (s, 1H), 7.66 – 7.73 (m, 3H), 7.39 – 7.51 (m, 4H), 7.12 (d, *J* = 8.2 Hz, 2H), 3.89 (bs, 1H), 2.29 (s, 3H), 2.01 (dq, *J* = 14.0 Hz, 7.2 Hz, 1H), 1.84 (dq, *J* = 14.0 Hz, 7.2 Hz, 1H), 1.04 (t, *J* = 7.2, 3H); <sup>13</sup>C NMR (101 MHz, CDCl<sub>3</sub>)  $\delta$  143.5, 142.8, 142.5, 141.3, 131.7 (q, *J*<sub>CF<sub>3</sub></sub> = 35 Hz), 131.7, 130.8, 129.6, 128.9, 127.2, 127.01, 126.5, 125.0, 124.4 (q, *J*<sub>CF<sub>3</sub></sub> = 274 Hz), 122.0 (sep, *J*<sub>CF<sub>3</sub></sub> = 3.6 Hz), 95.9, 83.3, 74.6, 37.4, 21.4, 8.9; MS: LC-APCI-MS (*m/z*): 493 [M-OH]<sup>+</sup>.

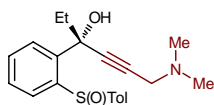

**Table 2, Entry 13. (Ss, R)-6-(dimethylamino)-3-(2-(p-tolylsulfinyl)phenyl)hex-4-yn-3-ol.** The title compound was prepared from (S)-1-(2-(p-tolylsulfinyl)phenyl)propan-1-one (0.41 mmol, 112 mg, 1.0 equiv) and (3-(dimethylamino)prop-1-yn-1-yl)lithium. <sup>1</sup>H NMR analysis of crude product indicated 83 % conversion and d.r. = 50:1. Purification by flash chromatography afforded pure product (d.r. = 50:1). To improve the diastereomeric ratio, the product was suspended in a mixture of hexane/EtOAc (10:1) and filtered to give (Ss, R) – isomer in 71% yield (103 mg), d.r. > 50:1,  $[\alpha]_D = -184^\circ$ , c = 0.5, CHCl<sub>3</sub>). <sup>1</sup>H NMR (400 MHz, CDCl<sub>3</sub>)  $\delta$  7.95 – 8.08 (m, 1H), 7.54 – 7.68 (m, 1H), 7.47 (d, *J* = 8.2 Hz, 2H), 7.40 – 7.43 (m, 2H), 7.16 (d, *J* = 8.1 Hz, 2H), 3.28 (d, *J* = 16.6 Hz, 1H), 3.20 (d, *J* = 16.6 Hz, 1H), 2.33 (s, 3H), 2.29 (s, 6H), 1.73 – 1.90 (m, 1H), 1.53 – 1.72 (m, 1H), 0.95 (t, *J* = 7.3, 3H); <sup>13</sup>C NMR (101 MHz, CDCl<sub>3</sub>)  $\delta$  144.2, 143.6, 143.37, 140.9, 130.5, 129.6, 128.7, 127.3, 126.9, 126.5, 89.5, 80.5, 74.0, 48.1, 44.2, 37.4, 21.5, 9.0; MS: LC-APCI-MS (*m/z*): 339 [M-OH+H]<sup>+</sup>.

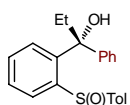

**Table 2, entry 14. (Ss, R)-1-phenyl-1-(2-(p-tolylsulfinyl)phenyl)propan-1-ol.** The title compound was prepared from (S)-1-(2-(p-tolylsulfinyl)phenyl)propan-1-one (0.39 mmol, 106 mg, 1.0 equiv) and PhMgBr

(0.78 mmol, 0.78 mL, 1.0 M solution in THF, 2.0 equiv.).  $^1\text{H}$  NMR analysis of crude product indicated 96 % conversion and d.r. > 50:1. Purification by flash chromatography (hexane/EtOAc, 80/20) afforded pure ( $S_s$ ,  $R$ ) – isomer (d.r. > 50:1) in 84 % yield (115 mg),  $[\alpha]_D = -217^\circ$ , ( $c = 0.5$ ,  $\text{CHCl}_3$ ).  $^1\text{H}$  NMR (400 MHz,  $\text{CDCl}_3$ )  $\delta$  8.10 – 8.19 (m, 1H), 7.42 – 7.53 (m, 3H), 7.40 (d,  $J = 8.0$  Hz, 2H), 7.31 – 7.36 (m, 2H), 7.23 – 7.30 (m, 3H), 7.17 – 7.23 (m, 1H), 7.14 (d,  $J = 8.0$  Hz, 2H), 2.49 (s, 1H), 2.29 (s, 3 H), 2.17 – 2.40 (m, 2H), 0.77 (t,  $J = 7.3$  Hz, 3H);  $^{13}\text{C}$  NMR (101 MHz,  $\text{CDCl}_3$ )  $\delta$  150.3, 150.3, 149.4, 149.1, 148.7, 144.7, 134.61, 133.8, 132.6, 132.5, 131.4, 131.2, 130.9, 130.6, 84.0, 39.6, 25.7, 12.2; MS: LC-APCI-MS ( $m/z$ ): 333  $[\text{M-OH}]^+$ .

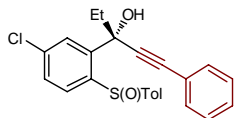

**Table 2, Entry 15. ( $S_s$ ,  $R$ )-(5-chloro-2-( $p$ -tolylsulfinyl)phenyl)-1-phenylpent-1-yn-3-ol.** The title compound was prepared from ( $S$ )-1-(5-chloro-2-( $p$ -tolylsulfinyl)phenyl)propan-1-one (0.41 mmol, 125 mg, 1.0 equiv.) and phenylethyryllithium.  $^1\text{H}$  NMR analysis of crude product indicated 91 % conversion and d.r. = 50:1. Purification by flash chromatography afforded pure product (d.r. = 50:1).

To improve the diastereomeric ratio, the product was suspended in a mixture of hexane/EtOAc (10:1) and filtered to give ( $S_s$ ,  $R$ ) – isomer in 78% yield (131 mg), d.r. > 50:1,  $[\alpha]_D = -167^\circ$ , ( $c = 0.5$  in  $\text{CHCl}_3$ ).  $^1\text{H}$  NMR (400 MHz,  $\text{CDCl}_3$ )  $\delta$  7.98 (d,  $J = 8.5$  Hz, 1H), 7.60 – 7.68 (m, 1H), 7.48 (d,  $J = 8.3$  Hz, 2H), 7.25 – 7.31 (m, 6H), 7.14 (d,  $J = 8.1$  Hz, 2H), 3.24 (bs, 1H), 2.31 (s, 3H), 1.77 – 1.90 (m, 1H), 1.52 – 1.69 (m, 1H), 1.00 (t,  $J = 7.3$  Hz, 3H);  $^{13}\text{C}$  NMR (101 MHz,  $\text{CDCl}_3$ )  $\delta$  145.9, 142.7, 141.5, 141.40, 136.8, 131.9, 129.7, 128.9, 128.7, 128.5, 127.8, 127.5, 127.0, 122.4, 91.39, 86.8, 74.8, 37.4, 21.6, 8.9; MS: EI-MS( $m/z$ ): 390  $[\text{M-H}_2\text{O}]^+$ , 391  $[\text{M-OH}]^+$ .

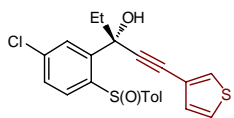

**Table 2, Entry 16. ( $S_s$ ,  $R$ )-3-(5-chloro-2-( $p$ -tolylsulfinyl)phenyl)-1-(thiophen-3-yl)pent-1-yn-3-ol.** The title compound was prepared from ( $S$ )-1-(5-chloro-2-( $p$ -tolylsulfinyl)phenyl)propan-1-one (0.39 mmol, 118 mg, 1.0 equiv.) and (thiophen-3-ylethyryl)lithium.  $^1\text{H}$  NMR analysis of crude product indicated 93 % conversion and d.r. = 33:1. Purification by flash chromatography afforded pure product (d.r. = 50:1). To improve the diastereomeric ratio, the product was suspended in a mixture of hexane/EtOAc (10:1) and filtered to give ( $S_s$ ,  $R$ ) – isomer in 82% yield (140 mg), d.r. > 50:1,  $[\alpha]_D = -129^\circ$ , ( $c = 1.0$ ,  $\text{CHCl}_3$ ).  $^1\text{H}$  NMR (400 MHz,  $\text{CDCl}_3$ )  $\delta$  7.95 (d,  $J = 8.5$  Hz, 1H), 7.64 (d,  $J = 2.1$  Hz, 1H), 7.47 (d,  $J = 8.2$  Hz, 2H), 7.31 – 7.40 (m, 2H), 7.19 – 7.28 (m, 1H), 7.13 (d,  $J = 8.1$  Hz, 2H), 7.02 (dd,  $J = 6.0$  Hz, 1.1 Hz, 1H), 3.69 (bs, 1H), 2.32 (s, 3H), 1.85 (dq,  $J = 14.5$  Hz, 7.3 Hz, 1H), 1.64 (dq,  $J = 14.5$  Hz, 7.3 Hz, 1H), 1.00 (t,  $J = 7.3$  Hz, 3H);  $^{13}\text{C}$  NMR (101 MHz,  $\text{CDCl}_3$ )  $\delta$  145.8, 142.7, 141.6, 141.4, 136.8, 130.0, 129.7, 129.6, 128.8, 127.9, 127.4, 126.9, 125.6, 121.4, 91.1, 82.1, 74.6, 37.4, 21.6, 8.2; MS: LC-APCI-MS ( $m/z$ ): 397  $[\text{M-OH}]^+$ ; 399  $[\text{M-OH}]^+$ ; 398  $[\text{M-OH}]^+$ .

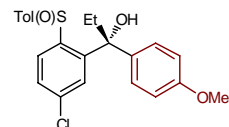

**Table 2, Entry 17. ( $S_s$ ,  $R$ )-1-(5-chloro-2-( $p$ -tolylsulfinyl)phenyl)-1-(4-methoxyphenyl)propan-1-ol.** The title compound was prepared from ( $S$ )-1-(5-chloro-2-( $p$ -tolylsulfinyl)phenyl)propan-1-one (0.39 mmol, 118 mg, 1.0 equiv.) and 4-methoxyphenylmagnesium bromide (0.78 mmol, 1.56 mL, 0.5 M solution in THF, 2.0 eq).  $^1\text{H}$  NMR analysis of crude product indicated 85 % conversion and d.r. > 50:1. Purification by flash chromatography (hexane/EtOAc, 80/20) afforded pure ( $S_s$ ,  $R$ ) – isomer (d.r. > 50:1) in 79 % yield (127 mg),  $[\alpha]_D = -129^\circ$ , ( $c = 1.0$  in  $\text{CHCl}_3$ ).  $^1\text{H}$  NMR (400 MHz,  $\text{CDCl}_3$ )  $\delta$  8.02 (d,  $J = 8.5$  Hz, 1H), 7.43 (d,  $J = 2.1$  Hz, 1H), 7.38 (dd,  $J = 8.5$  Hz, 2.1 Hz, 1H), 7.31 (d,  $J = 8.2$  Hz, 2H), 7.22 – 7.27 (m, 2H), 7.13 (d,  $J = 8.1$  Hz, 2H), 6.77 – 6.80 (m, 2H), 3.75 (s, 3H), 2.57 (bs, 1H), 2.32 (s, 3H), 2.17 – 2.28 (m, 2H), 0.73 (t,  $J = 7.3$  Hz, 3H);  $^{13}\text{C}$  NMR (101 MHz,  $\text{CDCl}_3$ )  $\delta$  159.0, 147.3, 143.9, 143.2, 140.9, 137.6, 136.8, 129.7, 128.7, 128.5, 127.7, 127.0, 126.4, 113.9, 79.4, 55.5, 35.0, 21.5, 8.3; MS: LC-APCI-MS ( $m/z$ ): 397  $[\text{M-OH}]^+$ ; 399  $[\text{M-OH}]^+$ ; 398  $[\text{M-OH}]^+$ .

$^1\text{H}$  NMR (400 MHz,  $\text{CDCl}_3$ )  $\delta$  8.02 (d,  $J = 8.5$  Hz, 1H), 7.43 (d,  $J = 2.1$  Hz, 1H), 7.38 (dd,  $J = 8.5$  Hz, 2.1 Hz, 1H), 7.31 (d,  $J = 8.2$  Hz, 2H), 7.22 – 7.27 (m, 2H), 7.13 (d,  $J = 8.1$  Hz, 2H), 6.77 – 6.80 (m, 2H), 3.75 (s, 3H), 2.57 (bs, 1H), 2.32 (s, 3H), 2.17 – 2.28 (m, 2H), 0.73 (t,  $J = 7.3$  Hz, 3H);  $^{13}\text{C}$  NMR (101 MHz,  $\text{CDCl}_3$ )  $\delta$  159.0, 147.3, 143.9, 143.2, 140.9, 137.6, 136.8, 129.7, 128.7, 128.5, 127.7, 127.0, 126.4, 113.9, 79.4, 55.5, 35.0, 21.5, 8.3; MS: LC-APCI-MS ( $m/z$ ): 397  $[\text{M-OH}]^+$ ; 399  $[\text{M-OH}]^+$ ; 398  $[\text{M-OH}]^+$ .

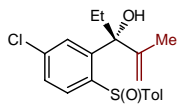

**Table 2, Entry 18. ( $S_s$ ,  $R$ )-3-(5-chloro-2-( $p$ -tolylsulfinyl)phenyl)-2-methylpent-1-en-3-ol.** The title compound was prepared from ( $S$ )-1-(5-chloro-2-( $p$ -tolylsulfinyl)phenyl)propan-1-one (0.39 mmol, 118 mg, 1.0 equiv.) and isopropenylmagnesium bromide (0.78 mmol, 1.56 mL, 0.5 M solution in THF, 2.0 eq).  $^1\text{H}$  NMR analysis of crude product indicated 89 % conversion and d.r. = 25:1. Purification by flash chromatography afforded pure product (d.r. = 25:1). To improve the diastereomeric ratio, the product was suspended in a mixture of hexane/EtOAc (10:1) and filtered to give ( $S_s$ ,  $R$ ) – isomer in 72% yield (97 mg), d.r. > 50:1,  $[\alpha]_D = -110^\circ$ , ( $c = 1.0$ ,  $\text{CHCl}_3$ ).  $^1\text{H}$  NMR (400 MHz,  $\text{CDCl}_3$ )  $\delta$  8.14 (d,  $J = 8.5$  Hz, 1H), 7.51 (d,  $J = 8.3$ , 2H), 7.41 (dd,  $J = 8.5$  Hz, 2.1 Hz, 1H), 7.25 (s, 1H), 7.17 (d,  $J = 8.0$  Hz, 2H), 5.12 (s, 1H), 4.99 – 5.08 (m, 1H), 2.33 (s, 3H), 1.89–2.14 (m, 2H), 1.65 (s, 3H), 0.70 (t,  $J = 7.3$  Hz, 3H),  $^{13}\text{C}$  NMR (101 MHz,  $\text{CDCl}_3$ )  $\delta$  147.70, 145.38, 144.45, 144.18, 140.80, 136.50, 129.70, 128.43, 128.24, 126.94, 126.43, 113.38, 81.09, 32.28, 21.53, 19.49, 7.81; LC-APCI-MS ( $m/z$ ): 331  $[\text{M-OH}]^+$ ; 333  $[\text{M-OH}]^+$ ; 332  $[\text{M-OH}]^+$ .

$^1\text{H}$  NMR (400 MHz,  $\text{CDCl}_3$ )  $\delta$  8.14 (d,  $J = 8.5$  Hz, 1H), 7.51 (d,  $J = 8.3$ , 2H), 7.41 (dd,  $J = 8.5$  Hz, 2.1 Hz, 1H), 7.25 (s, 1H), 7.17 (d,  $J = 8.0$  Hz, 2H), 5.12 (s, 1H), 4.99 – 5.08 (m, 1H), 2.33 (s, 3H), 1.89–2.14 (m, 2H), 1.65 (s, 3H), 0.70 (t,  $J = 7.3$  Hz, 3H),  $^{13}\text{C}$  NMR (101 MHz,  $\text{CDCl}_3$ )  $\delta$  147.70, 145.38, 144.45, 144.18, 140.80, 136.50, 129.70, 128.43, 128.24, 126.94, 126.43, 113.38, 81.09, 32.28, 21.53, 19.49, 7.81; LC-APCI-MS ( $m/z$ ): 331  $[\text{M-OH}]^+$ ; 333  $[\text{M-OH}]^+$ ; 332  $[\text{M-OH}]^+$ .

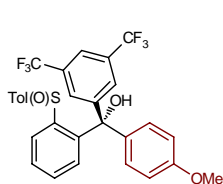

**Table 2, Entry 19. ( $S_s$ ,  $S$ )-(3,5-bis(trifluoromethyl)phenyl)(4-methoxyphenyl)(2-( $p$ -tolylsulfinyl)phenyl)methanol.** The title compound was prepared from ( $S$ )-(3,5-bis(trifluoromethyl)phenyl)(2-( $p$ -tolylsulfinyl)phenyl)methanone (0.39 mmol, 177 mg, 1.0 equiv.) and 4-methoxyphenylmagnesium bromide (0.78 mmol, 1.56 mL, 0.5 M solution in THF, 2.0 equiv.).  $^1\text{H}$  NMR analysis of crude product indicated 87 % conversion and d.r. = 50:1. Purification by flash chromatography (hexane/EtOAc, 80/20) afforded pure ( $S_s$ ,  $S$ ) – isomer (d.r. > 50:1) in 75 % yield (165

mg),  $[\alpha]_D = -119^\circ$ , (c = 0.5, CHCl<sub>3</sub>). <sup>1</sup>H NMR (400 MHz, CDCl<sub>3</sub>)  $\delta$  8.06 (dd,  $J = 7.9, 1.3$ , 1H), 7.71 (s, 1H), 7.53 (s, 2H), 7.45 – 7.51 (m, 1H), 7.33 (td,  $J = 7.6$  Hz, 1.4, 1H), 7.27 – 7.26 (m, 2H), 7.02 (d,  $J = 8.1$  Hz, 2H), 6.67– 6.70 (m, 2H), 6.81 (m, 8.9, 2H), 6.69 (dd,  $J = 7.9$  Hz, 1.2, 1H), 4.72 (s, 1H), 3.80 (s, 3H), 2.26 (s, 3H); <sup>13</sup>C NMR (101 MHz, CDCl<sub>3</sub>)  $\delta$  159.5, 148.3, 144.4, 144.6, 141.4, 138.4, 131.1 (q,  $J_{CF_3} = 33.4$  Hz), 130.8, 130.1, 129.8, 129.2, 129.1, 128.4, 127.0, 123.8, 123.4 (q,  $J_{CF_3} = 272.7$  Hz), 121.1 (sep,  $J_{CF_3} = 6.5$  Hz), 114.1, 83.1, 55.5, 21.3. MS: LC-APCI-MS ( $m/z$ ): 547 [M-OH]<sup>+</sup>.

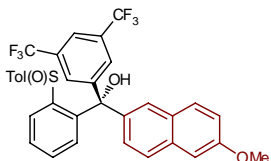

**Table 2, Entry 20. (Ss, S)-(3,5-bis(trifluoromethyl)phenyl)(6-methoxynaphthalen-2-yl)(2-(p-tolylsulfinyl)phenyl)methanol.** The title compound was prepared from (S)-(3,5-bis(trifluoromethyl)phenyl)(2-(p-tolylsulfinyl)phenyl)methanone (0.39 mmol, 177 mg, 1.0 equiv.) and (6-methoxynaphthalen-2-yl)magnesium bromide (0.78 mmol, 1.56 mL, 0.5 M solution in THF, 2.0 equiv.). <sup>1</sup>H NMR analysis of crude product indicated 85 % conversion and d.r. > 50:1. Purification by flash chromatography (hexane/EtOAc, 80/20) afforded pure (S<sub>s</sub>, S) – isomer (d.r. >

50:1) in 79 % yield (189 mg)  $[\alpha]_D = -130^\circ$ , (c = 0.5, CHCl<sub>3</sub>). <sup>1</sup>H NMR (400 MHz, CDCl<sub>3</sub>)  $\delta$  8.06 (d,  $J = 7.9$  Hz, 1H), 7.73 (s, 1H), 7.67 (d,  $J = 8.7$  Hz, 1H), 7.58 (s, 2H), 7.46 – 7.55 (m, 2H), 7.29 – 7.45 (m, 2H), 7.10 – 7.19 (m, 5H), 6.85 – 7.00 (m, 2H), 6.73 (dd,  $J = 7.8$  Hz, 1.2, 1H), 5.32 (bs, 1H), 3.92 (s, 3H), 2.20 (s, 3H); <sup>13</sup>C NMR (101 MHz, CDCl<sub>3</sub>)  $\delta$  158.6, 148.1, 141.1, 143.9, 141.3, 134.2, 131.0, 130.5, 130.1, 130.5 (q,  $J_{CF_3} = 33$  Hz), 129.7, 129.1, 128.2, 128.1, 127.8, 127.0, 126.7, 126.1, 122.0 (q,  $J_{CF_3} = 273$  Hz), 121.2 (sep,  $J_{CF_3} = 3.6$  Hz), 119.5, 105.7, 83.5, 55.6, 21.3; MS: LC-APCI-MS ( $m/z$ ): 596 [M-H<sub>2</sub>O]<sup>+</sup>.

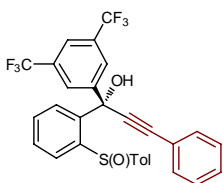

**Table 2, entry 21. (Ss, R)-1-(3,5-bis(trifluoromethyl)phenyl)-3-phenyl-1-(2-(p-tolylsulfinyl)phenyl)prop-2-yn-1-ol.** The title compound was prepared from (S)-(3,5-bis(trifluoromethyl)phenyl)(2-(p-tolylsulfinyl)phenyl)methanone (0.41 mmol, 187 mg, 1.0 equiv) and phenylethyneyllithium. <sup>1</sup>H NMR analysis of crude product indicated 91 % conversion and d.r. = 50:1. Purification by flash chromatography afforded pure product (d.r. = 50:1). To improve the diastereomeric ratio, the product was suspended in a mixture of hexane/EtOAc (10:1) and filtered to

give (S<sub>s</sub>, R) – isomer in 77% yield (175 mg), d.r. > 50:1,  $[\alpha]_D = -151^\circ$ , (c = 0.5, CHCl<sub>3</sub>). <sup>1</sup>H NMR (400 MHz, CDCl<sub>3</sub>)  $\delta$  8.04 – 7.96 (m, 1H), 7.75 (s, 2H), 7.67 (s, 1H), 7.58 – 7.65 (m, 1H), 7.39 – 7.51 (m, 4H), 7.27 – 7.39 (m, 3H), 7.18 (d,  $J = 8.0$  Hz, 2H), 6.93 (d,  $J = 8.0$  Hz, 2H), 5.21 (bs, 1H), 2.21 (s, 3H); <sup>13</sup>C NMR (101 MHz, CDCl<sub>3</sub>)  $\delta$  146.8, 143.4, 141.5, 141.8, 140.9, 132.0, 131.2 (q,  $J_{CF_3} = 33$  Hz), 130.6, 129.9, 129.6, 129.32, 129.1, 128.6, 127.0, 126.7, 122.0 (q,  $J_{CF_3} = 272$  Hz), 121.9, 121.5, 90.9, 89.28, 75.1, 21.3; MS: LC-APCI-MS ( $m/z$ ): 541 [M-OH]<sup>+</sup>.

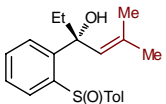

**Table 2, Entry 22. (Ss, R)-4-methyl-2-(2-(p-tolylsulfinyl)phenyl)pent-3-en-2-ol.** The title compound was prepared from (S)-1-(2-(p-tolylsulfinyl)phenyl)propan-1-one (0.39 mmol, 106 mg, 1.0 equiv) and 2-methyl-1-propenylmagnesium bromide (0.78 mmol, 1.56 mL, 0.5 M solution in THF, 2.0 equiv.). <sup>1</sup>H NMR analysis of crude product indicated 95 % conversion and d.r. = 25:1. Purification by flash chromatography

afforded pure product (d.r. = 50:1). To improve the diastereomeric ratio, the product was suspended in a mixture of hexane/EtOAc (10:1) and filtered to give (S<sub>s</sub>, R) – isomer in 80% yield (103 mg), d.r. > 50:1,  $[\alpha]_D = -135^\circ$ , (c = 0.5 in CHCl<sub>3</sub>). <sup>1</sup>H NMR (400 MHz, CDCl<sub>3</sub>)  $\delta$  7.97 - 8.07(m, 1 H), 7.55 – 7.70 (m, 1 H), 7.38 – 7.50 (m, 2 H), 7.31 – 7.38 (m, 2 H), 7.13 – 7.21 (m, 2 H), 5.73 – 5.77 (m, 1 H), 2.33 (s, 3 H), 2.10 (bs, 1 H), 1.87 - 1.93 (m, 2H), 1.44 (d,  $J = 1.2$  Hz, 3 H), 1.33 (d,  $J = 1.2$  Hz, 3 H), 0.75 (t,  $J = 7.3$  Hz, 3 H).); <sup>13</sup>C NMR (101 MHz, CDCl<sub>3</sub>)  $\delta$  147.2, 140.8, 138.5, 133.0, 130.7, 129.7, 127.9, 127.5, 127.2, 126.6, 76.8, 38.3, 26.6, 21.5, 19.3, 7.9; MS: EI-MS( $m/z$ ): 311 [M-OH]<sup>+</sup>.

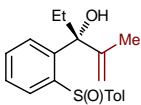

**Table 2, Entry 23. (Ss, R)-3-methyl-2-(2-(p-tolylsulfinyl)phenyl)but-3-en-2-ol-** The title compound was prepared from (S)-1-(2-(p-tolylsulfinyl)phenyl)propan-1-one (0.39 mmol, 106 mg, 1.0 equiv) and isopropenylmagnesium bromide (0.78 mmol, 1.56 mL, 0.5 M solution in THF, 2.0 eq). <sup>1</sup>H NMR analysis of crude product indicated 96 % conversion and d.r. = 20:1. Purification by flash chromatography afforded pure

product (d.r. = 20:1). To improve the diastereomeric ratio, the product was suspended in a mixture of hexane/EtOAc (10:1) and filtered to give (S<sub>s</sub>, R) – isomer in 86% yield (105 mg), d.r. > 50:1,  $[\alpha]_D = -125^\circ$ , (c = 0.5, CHCl<sub>3</sub>). <sup>1</sup>H NMR (400 MHz, CDCl<sub>3</sub>)  $\delta$  8.19 (dd,  $J = 7.8$  Hz, 1.1, 1H), 7.54 (d,  $J = 8.2$  Hz, 2H), 7.45 (td,  $J = 7.5$  Hz, 1.0 Hz, 1H), 7.39 (td,  $J = 7.5$  Hz, 1.0 Hz, 1H), 7.29 (d,  $J = 7.7$  Hz, 1H), 7.17 (d,  $J = 8.0$  Hz, 2H), 5.10 (s, 1H), 5.02 (s, 1H), 2.32 (s, 3H), 2.30 (m, 1H), 2.03 (m, 2H), 1.64 (s, 3H), 0.73 (t,  $J = 7.3$  Hz, 3H). <sup>13</sup>C NMR (101 MHz, CDCl<sub>3</sub>)  $\delta$  148.3, 145.6, 144.8, 143.34, 140.5, 130.2, 129.6, 128.4, 126.9, 126.8, 126.5, 112.8, 81.3, 32.3, 21.5, 19.5, 7.9; MS: EI-MS( $m/z$ ): 314 [M]<sup>+</sup>, 297 [M-OH]<sup>+</sup>.

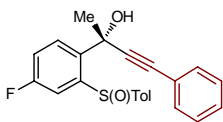

**Table 2, Entry 24. (Ss, R)-2-(4-fluoro-2-(p-tolylsulfinyl)phenyl)-4-phenylbut-3-yn-2-ol.** The title compound was prepared from (S)-1-(4-fluoro-2-(p-tolylsulfinyl)phenyl)ethanone (0.40 mmol, 110 mg, 1.0 equiv) and phenylethyneyllithium. <sup>1</sup>H NMR analysis of crude product indicated 97 % conversion and d.r. = 14:1. Purification by flash chromatography afforded pure product (d.r. = 14:1). To improve the diastereomeric ratio, the product was suspended in a mixture of hexane/EtOAc (10:1) and filtered to give (S<sub>s</sub>, R) – isomer

in 77% yield (116 mg), d.r. > 50:1,  $[\alpha]_D = -196^\circ$ , (c = 1.0, CHCl<sub>3</sub>). <sup>1</sup>H NMR (400 MHz, CDCl<sub>3</sub>)  $\delta$  7.84 (dd,  $J = 9.0$  Hz, 2.7 Hz, 1H), 7.61 (dd,  $J = 8.7$  Hz, 5.2 Hz, 1H), 7.54 (d,  $J = 8.2$  Hz, 2H), 7.38 – 7.46 (m, 2H), 7.26 – 7.37 (m, 3H), 7.16 (d,  $J =$



8.1 Hz, 2H), 7.06 (ddd,  $J = 10.0$  Hz, 5.7 Hz, 2.0 Hz, 1H), 3.82 (bs, 1H), 2.32 (s, 3H), 1.53 (s, 3H).  $^{13}\text{C}$  NMR (101 MHz,  $\text{CDCl}_3$ )  $\delta$  162.5 (d,  $J_{\text{FC}} = 250$  Hz), 145.5 (d,  $J_{\text{FC}} = 4.7$  Hz), 142.3, 141.6, 140.1 (d,  $J_{\text{FC}} = 3.6$  Hz), 132.0, 129.8, 129.2 (d,  $J_{\text{FC}} = 7.3$  Hz), 128.7, 128.4, 127.3, 122.6, 117.5 (d,  $J_{\text{FC}} = 21.7$  Hz), 112.5 (d,  $J_{\text{FC}} = 25.5$  Hz), 93.0, 85.0, 71.4, 32.5, 21.6; MS: EI-MS( $m/z$ ): 361 [ $\text{M-OH}$ ] $^+$ .

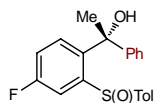

**Table 2, Entry 25. (*Ss, R*)-1-(4-fluoro-2-(*p*-tolylsulfinyl)phenyl)-1-phenylethanol.** The title compound was prepared from (*S*)-1-(4-fluoro-2-(*p*-tolylsulfinyl)phenyl)ethanone (0.39 mmol, 107 mg, 1.0 equiv) and  $\text{PhMgBr}$  (0.78 mmol, 0.78 mL, 1.0 M solution in THF, 2.0 eq).  $^1\text{H}$  NMR analysis of crude product indicated 95 % conversion and d.r. > 50:1. Purification by flash chromatography (hexane/EtOAc, 80/20) afforded pure (*Ss, R*) – isomer (d.r. > 50:1) in 85 % yield (117 mg),  $[\alpha]_{\text{D}} = -260^\circ$ , ( $c = 0.3$ ,  $\text{CHCl}_3$ ).  $^1\text{H}$  NMR (400 MHz,  $\text{CDCl}_3$ )  $\delta$  7.92 (dd,  $J = 8.9$  Hz, 2.8 Hz, 1H), 7.41 – 7.48 (m, 2H), 7.37 (dd,  $J = 8.7$  Hz, 5.1 Hz, 1H), 7.21 – 7.32 (m, 5H), 7.17 (d,  $J = 8.0$  Hz, 2H), 7.10 (ddd,  $J = 8.6$  Hz, 7.4 Hz, 2.8 Hz, 1H), 2.49 (s, 1H), 2.34 (s, 3H), 1.83 (s, 3H).  $^{13}\text{C}$  NMR (101 MHz,  $\text{CDCl}_3$ )  $\delta$  162.6 (d,  $J_{\text{FC}} = 250$  Hz), 147.2, 142.0, 141.1, 129.8, 128.8 (d,  $J_{\text{FC}} = 7.11$  Hz), 128.6, 127.6, 126.5, 125.9, 117.4 (d,  $J_{\text{FC}} = 21.4$  Hz), 113.5 (d,  $J_{\text{FCC}} = 25.5$  Hz), 77.4, 32.0, 21.5. MS: EI-MS( $m/z$ ): 337 [ $\text{M-OH}$ ] $^+$ .

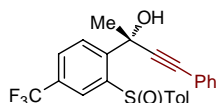

**Table 2, Entry 26 (*Ss, R*)-2-(4-(trifluoromethyl)-2-(*p*-tolylsulfinyl)phenyl)-4-phenylbut-3-yn-2-ol.** The title compound was prepared from (*S*)-1-(4-(trifluoromethyl)-2-(*p*-tolylsulfinyl)phenyl)ethanone (200 mg, 0.61 mmol) and phenylethyneyllithium.  $^1\text{H}$  NMR analysis of crude product indicated 92% conversion and d.r. = 10:1. Purification by flash chromatography afford pure major product in 79% yield (207mg) and an unseparated mixture of the minor product and substrate 39 mg.  $[\alpha]_{\text{D}}^{25} - 260.0^\circ$  ( $c = 0.1$ ,  $\text{CHCl}_3$ ).  $^1\text{H}$  NMR (400 MHz,  $\text{CDCl}_3$ )  $\delta$ : 8.47 (d,  $J = 1.2$  Hz, 1H), 7.77 (d,  $J = 8.0$  Hz, 1H), 7.66 (dd,  $J_1 = 1.2$  Hz,  $J_2 = 8.0$  Hz, 1H), 7.52 (d,  $J = 8.0$  Hz, 2H), 7.39 – 7.41 (m,  $J = 8.0$  Hz, 2H), 7.25-7.33 (m, 3H), 7.17 (d,  $J = 8.0$  Hz, 2H), 3.49 (br, 1H), 2.33 (s, 3H), 1.54 (s, 3H);  $^{13}\text{C}$  NMR (101 MHz,  $\text{CDCl}_3$ )  $\delta$ : 148.2, 143.7, 142.1, 142.0, 132.1, 130.6 (q,  $J = 33.0$  Hz), 129.9, 128.8, 128.5, 128.5, 127.6, 127.4 (q,  $J = 4.0$  Hz), 123.7 (q,  $J = 271.0$  Hz), 121.8 (q,  $J = 4.0$  Hz), 92.3, 85.2, 72.0, 32.3, 21.6. EI-MS ( $m/z$ ): 410 [ $\text{M-H}_2\text{O}$ ] $^+$ .

**General procedure for the reductive cleavage of sulfoxide.** To the solution of sulfoxide in THF (0.1 M) at  $-78^\circ\text{C}$  was added *n*-BuLi (1.6 M solution in hexanes, 4.0 equiv.). After being stirred for 30 min at  $-78^\circ\text{C}$ , saturated aqueous  $\text{NH}_4\text{Cl}$  was added, followed by extraction with EtOAc (3X). The combined organic layers were dried over  $\text{MgSO}_4$ , filtered, and evaporated to give crude product, which was purified by flash chromatography.

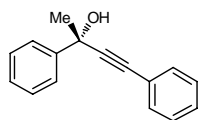

**Table 3, Entry 1. (*S*)-2,4-Diphenylbut-3-yn-2-ol.<sup>3</sup>** The title compound was prepared from (*Ss, R*)-4-(*o*-tolyl)-2-(2-(*p*-tolylsulfinyl)phenyl)but-3-yn-2-ol. (0.17 mmol, 60 mg, 1.0 equiv) and *n*-BuLi (0.68 mmol, 420  $\mu\text{L}$ , 1.6 M solution in hexanes, 4.0 equiv.). Purification of the crude product by flash chromatography on silica gel (hexanes/EtOAc 9:1, v/v) yielded (*S*)-2,4-diphenylbut-3-yn-2-ol in 96 % (36 mg); ee = 97%. The use of recrystallized (*Ss, R*)-4-(*o*-tolyl)-2-(2-(*p*-tolylsulfinyl)phenyl)but-3-yn-2-ol gave product in 97% yield and ee = 99%.  $[\alpha]_{\text{D}} = +44^\circ$  ( $c = 2.0$ , Acetone).  $^1\text{H}$  NMR (400 MHz,  $\text{CDCl}_3$ )  $\delta$  7.70 – 7.77 (m, 2H), 7.46 – 7.52 (m, 2H), 7.36 – 7.44 (m, 2H), 7.29 – 7.34 (m, 4H), 2.54 (s, 1H), 1.88 (s, 3H).  $^{13}\text{C}$  NMR (101 MHz,  $\text{CDCl}_3$ )  $\delta$  145.9, 131.9, 128.7, 128.6, 128.5, 128.0, 125.2, 122.8, 92.6, 85.2, 70.6, 33.5; MS: EI-MS( $m/z$ ): 222 [ $\text{M}$ ] $^+$ , 204 [ $\text{M-H}_2\text{O}$ ] $^+$ . HPLC condition: Chiralcel OD-H column, 1% isopropanol in hexane, 1.0 mL/min,  $T_{\text{R}} = 24.7$  (minor), 36.9 (major).

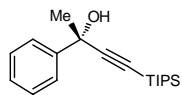

**Table 3, Entry 2. (*S*)-2-phenyl-4-(triisopropylsilyl)but-3-yn-2-ol.** The title compound was prepared from (*Ss, R*)-2-(2-(*p*-tolylsulfinyl)phenyl)-4-(triisopropylsilyl)but-3-yn-2-ol (0.09 mmol, 40 mg, 1.0 equiv) and *n*-BuLi (0.36 mmol, 220  $\mu\text{L}$ , 1.6 M solution in hexanes, 4.0 equiv.). Purification of the crude product by flash chromatography on silica gel (hexanes/EtOAc 9:1, v/v) yielded (*S*)-2-phenyl-4-(triisopropylsilyl)but-3-yn-2-ol in 92 % (25 mg); ee = 96%;  $[\alpha]_{\text{D}} = +14^\circ$ , ( $c = 1.0$ , Acetone).  $^1\text{H}$  NMR (400 MHz,  $\text{CDCl}_3$ )  $\delta$  7.64 – 7.72 (m, 2H), 7.31 – 7.39 (m, 2H), 7.26 – 7.31 (m, 1H), 2.29 (bs, 1H), 1.77 (s, 3H), 1.09 (s, 21H).  $^{13}\text{C}$  NMR (101 MHz,  $\text{CDCl}_3$ )  $\delta$  145.8, 128.4, 127.8, 125.2, 111.2, 85.9, 70.6, 33.9, 18.9, 11.4; MS: EI-MS( $m/z$ ): 302 [ $\text{M}$ ] $^+$ . HPLC condition: Chiralcel OD-H column, 0.1% isopropanol in hexane, 0.5 mL/min,  $T_{\text{R}} = 18.9$  (minor), 21.1 (major).

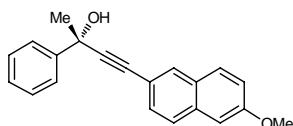

**Table 3, Entry 3. (*S*)-4-(6-methoxynaphthalen-2-yl)-2-phenylbut-3-yn-2-ol.** The title compound was prepared from (*Ss, R*)-4-(6-methoxynaphthalen-2-yl)-2-(2-(*p*-tolylsulfinyl)phenyl)but-3-yn-2-ol (0.08 mmol, 36 mg, 1.0 equiv) and *n*-BuLi (0.33, 200  $\mu\text{L}$ , 1.6 M solution in hexanes, 4.0 equiv.). Purification of the crude product by flash chromatography on silica gel (hexanes/EtOAc 9:1, v/v) yielded (*S*)-4-(6-methoxynaphthalen-2-yl)-2-phenylbut-3-yn-2-ol in 94 % (23 mg); ee > 99%;  $[\alpha]_{\text{D}} = -50^\circ$ , ( $c = 0.3$  in  $\text{CDCl}_3$ ).  $^1\text{H}$  NMR (400 MHz,  $\text{CDCl}_3$ )  $\delta$  7.93 (s, 1H), 7.75 – 7.83 (m, 2H), 7.69 (dd,  $J = 8.6$  Hz, 5.7 Hz, 2H), 7.49 (dd,  $J = 8.5$  Hz, 1.6 Hz, 1H), 7.41 (t,  $J = 7.6$  Hz, 2H), 7.25 - 7.33 (m, 1H), 7.16 (dd,  $J = 9.0$  Hz, 2.5 Hz,

1H), 7.11 (d,  $J = 2.4$  Hz, 1H), 3.93 (s, 3H), 2.49 (s, 1H), 1.91 (s, 3H).  $^{13}\text{C}$  NMR (101 MHz,  $\text{CDCl}_3$ )  $\delta$  158.6, 146.0, 134.4, 131.7, 129.5, 129.2, 128.5, 128.0, 127.0, 125.2, 119.7, 117.6, 106.0, 92.2, 85.6, 70.7, 55.7, 33.6; MS: EI-MS( $m/z$ ): 302 [ $\text{M}$ ] $^+$ . HPLC condition: Chiracel OD-H column, 2% isopropanol in hexane, 1.0 mL/min,  $T_R = 53.9$ .

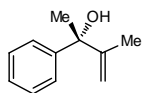

**Table 3, Entry 4. (*R*)-3-methyl-2-phenylbut-3-en-2-ol.** The title compound was prepared from (*Ss*, *R*)-3-methyl-2-(2-(*p*-tolylsulfinyl)phenyl)but-3-en-2-ol (0.2 mmol, 60 mg, 1.0 equiv) and *n*-BuLi (0.8 mmol, 500  $\mu\text{L}$ , 1.6 M solution in hexanes, 4.0 equiv.). Purification of the crude product by flash chromatography on silica gel (hexanes/EtOAc 9:1, v/v) yielded (*R*)-3-methyl-2-phenylbut-3-en-2-ol in 93 % (30 mg); ee = 98%;  $[\alpha]_D = -8.6^\circ$ , ( $c = 0.86$ ,  $\text{CHCl}_3$ ).  $^1\text{H}$  NMR (400 MHz,  $\text{CDCl}_3$ )  $\delta$  7.42 - 7.44 (m, 2H), 7.28 - 7.38 (m, 2H), 7.20 - 7.20 (m, 1H), 5.10 - 5.34 (m, 1H), 4.86 - 5.05 (m, 1H), 1.86 (s, 1H), 1.69 (s, 3H), 1.61 (s, 3H).  $^{13}\text{C}$  NMR (101 MHz,  $\text{CDCl}_3$ )  $\delta$  150.33, 146.12, 128.36, 127.11, 125.43, 110.88, 77.16, 28.87, 19.32; MS: EI-MS( $m/z$ ): 145 [ $\text{M}-\text{OH}$ ] $^+$ , 163 [ $\text{M}+\text{H}$ ] $^+$ . HPLC condition: Chiracel OD-H column, 1% isopropanol in hexane, 1.0 mL/min,  $T_R = 12.0$  (major), 14.6 (minor).

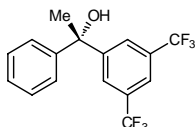

**Table 3, Entry 5. (*S*)-1-(3,5-bis(trifluoromethyl)phenyl)-1-phenylethanol.** The title compound was prepared from (*Ss*, *R*)-1-(3,5-bis(trifluoromethyl)phenyl)-1-(2-(*p*-tolylsulfinyl)phenyl)ethanol (0.06 mmol, 30 mg, 1.0 equiv) and *n*-BuLi (0.25 mmol, 160  $\mu\text{L}$ , 1.6 M solution in hexanes, 4.0 equiv.). Purification of the crude product by flash chromatography on silica gel (hexanes/EtOAc 9:1, v/v) yielded (*S*)-1-(3,5-bis(trifluoromethyl)phenyl)-1-phenylethanol in 96 % (20 mg); ee >99%;  $[\alpha]_D = +34^\circ$ , ( $c = 1.0$ ,  $\text{CHCl}_3$ ).  $^1\text{H}$  NMR (400 MHz,  $\text{CDCl}_3$ )  $\delta$  7.81 (s, 2H), 7.68 (s, 1H), 7.26 - 7.39 (m, 4H), 7.20 - 7.27 (m, 1H), 2.22 (bs, 1H), 1.93 (s, 3H).  $^{13}\text{C}$  NMR (400 MHz,  $\text{CDCl}_3$ )  $\delta$  150.9, 146.3, 131.6 (q,  $J_{\text{FC}} = 33.1$  Hz), 128.9, 128.1, 126., 125.9, 123.5 (q,  $J_{\text{FC}} = 274$  Hz), 121.0, 76.0, 31.0; MS: EI-MS( $m/z$ ): 334 [ $\text{M}$ ] $^+$ . HPLC condition: Chiracel OD-H column, 1% isopropanol in hexane, 1.0 mL/min,  $T_R = 33.1$ .

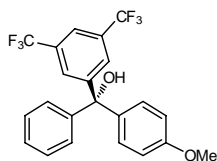

**Table 3, Entry 6. (*S*)-(3,5-bis(trifluoromethyl)phenyl)(4-methoxyphenyl)(phenyl) methanol.** The title compound was prepared from (*Ss*, *S*)-(3,5-bis(trifluoromethyl)phenyl)(4-methoxyphenyl)(2-(*p*-tolylsulfinyl)phenyl)methanol (0.11 mmol, 62 mg, 1.0 equiv) and *n*-BuLi (0.44 mmol, 270  $\mu\text{L}$ , 1.6 M solution in hexanes, 4.0 equiv.). Purification of the crude product by flash chromatography on silica gel (hexanes/EtOAc 9:1, v/v) yielded (*S*)-(3,5-bis(trifluoromethyl)phenyl)(4-methoxyphenyl)(phenyl) methanol in 98 % yield (46 mg), ee = 92%. The use of recrystallized (*S*)-(3,5-bis(trifluoromethyl)phenyl)(4-methoxyphenyl)(phenyl)methanol gave product in 99% yield and ee >99%,  $[\alpha]_D = +4.8^\circ$ , ( $c = 1.0$ ,  $\text{CHCl}_3$ ).  $^1\text{H}$  NMR (400 MHz,  $\text{CDCl}_3$ )  $\delta$  7.78 (s, 2H), 7.72 (s, 1H), 7.23 - 7.32 (m, 3H), 7.14 - 7.20 (m, 2H), 7.02 - 7.07 (m, 2H), 6.77 - 6.83 (m, 2H), 3.74 (s, 3H), 2.73 (s, 1H).  $^{13}\text{C}$  NMR (400 MHz,  $\text{CDCl}_3$ )  $\delta$  159.4, 149.8, 145.8, 137.9, 130.7 (q,  $J_{\text{FC}} = 33.2$  Hz), 129.4, 128.7, 128.2, 128.0, 127.6, 125.8 (q,  $J_{\text{FC}} = 272.8$  Hz), 121.2, 114.0, 81.5, 55.5; MS: EI-MS( $m/z$ ): 426 [ $\text{M}$ ] $^+$ . HPLC condition: Chiracel OD-H column, 1% isopropanol in hexane, 1.0 mL/min,  $T_R = 15.9$  (major), 21.4 (minor).

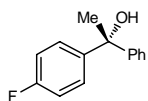

**Table 3, Entry 7. (*R*)-1-(4-fluorophenyl)-1-phenylethanol.**<sup>4</sup> The title compound was prepared from (*Ss*, *R*)-1-(4-fluoro-2-(*p*-tolylsulfinyl)phenyl)-1-phenylethanol (0.07 mmol, 26 mg, 1.0 equiv) and *n*-BuLi (0.30 mmol, 180  $\mu\text{L}$ , 1.6 M solution in hexanes, 4.0 equiv.). Purification of the crude product by flash chromatography on silica gel (hexanes/EtOAc 9:1, v/v) yielded (*R*)-1-(4-fluorophenyl)-1-phenylethanol in 95% (15 mg); ee >99%;  $[\alpha]_D = -5^\circ$ , ( $c = 0.6$ , Acetone).  $^1\text{H}$  NMR (400 MHz,  $\text{CDCl}_3$ )  $\delta$  7.29 - 7.41 (m, 6H), 7.21 - 7.27 (m, 1H), 6.96 - 7.00 (m, 2H), 2.09 (bs, 1H), 1.93 (s, 3H).  $^{13}\text{C}$  NMR (400 MHz,  $\text{CDCl}_3$ )  $\delta$  161.5 (d,  $J = 245$  Hz), 148.0, 144.0 (d,  $J = 3.2$  Hz), 128.5, 127.8 (d,  $J_{\text{FC}} = 8.0$  Hz), 127.3, 126.0, 115.1 (t,  $J_{\text{FC}} = 21.0$  Hz), 76.1, 31.2. EI-MS( $m/z$ ): 216 [ $\text{M}$ ] $^+$ . HPLC condition: Chiracel OD-H column, 0.4% isopropanol in hexane, 0.4 mL/min,  $T_R = 53.6$ .

## Reactions with electrophile ( $\text{X} = \text{I}^+$ , $\text{O}_2$ , $\text{CO}_2$ ), Scheme 1

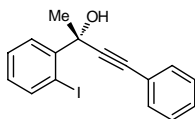

**(*R*)-2-(2-iodophenyl)-4-phenylbut-3-yn-2-ol 4.** To a solution of **2a** (0.14 mmol, 50 mg, 1.0 equiv.) in THF (5 mL) was added MeLi (0.16 mmol, 100  $\mu\text{L}$ , 1.6 M solution in  $\text{Et}_2\text{O}$ , 1.15 equiv) at  $-78^\circ\text{C}$ . After the reaction mixture had been stirred for 10 min at  $-78^\circ\text{C}$ , *tert*-BuLi (0.28 mmol, 165  $\mu\text{L}$ , 1.7 M in pentane, 2.0 equiv.) was added and stirring continued for 15 min at this same temperature. The solution of 1,2-diiodoethane (0.56 mmol, 157 mg, 4.0 equiv) in THF (1 mL) was then added. After stirring for 2 h at  $-78^\circ\text{C}$ , the reaction mixture was warmed up to rt, diluted with EtOAc and successively washed with 20% aqueous sodium thiosulfate solution, brine, dried over magnesium sulfate, filtered and concentrated under vacuum to give crude product, which was purified by flash chromatography (toluene/hexane, 90/10) to afford (*R*)-2-(2-iodophenyl)-4-phenylbut-3-yn-2-ol in 70 % yield (34 mg),  $[\alpha]_D = 22^\circ$ , ( $c = 1.2$ ,  $\text{CHCl}_3$ ).  $^1\text{H}$  NMR (400 MHz,  $\text{CDCl}_3$ )  $\delta$  7.99 (dd,  $J = 7.8$  Hz, 1.2 Hz, 1H), 7.85 (dd,  $J = 8.0$  Hz, 1.6 Hz, 1H), 7.45 - 7.51 (m, 2H), 7.33 - 7.43 (m, 1H), 7.27 - 7.33 (m, 3H), 6.93 - 7.02 (m, 1H), 3.01 (s, 1H), 2.03 (s, 3H).  $^{13}\text{C}$  NMR (101 MHz,  $\text{CDCl}_3$ )  $\delta$  145.5, 142.6, 131.8, 129.5, 128.7, 128.5, 128.5, 126.6, 122.8, 94.7, 91.8, 86.5, 71.2, 30.2; EI-MS( $m/z$ ): 348 [ $\text{M}$ ] $^+$

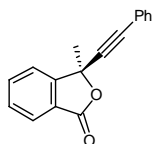

**(R)-3-methyl-3-(phenylethynyl)isobenzofuran-1(3H)-one 5.** To a solution of **2a** (0.14 mmol, 50 mg, 1.0 equiv.) in THF (5 mL) was added MeLi (0.16 mmol, 100  $\mu$ L, 1.6 M solution in Et<sub>2</sub>O, 1.15 equiv) at -78 °C. After the reaction mixture had been stirred for 10 min at -78 °C, *tert*-BuLi (0.28 mmol, 165  $\mu$ L, 1.7 M in pentane, 2.0 equiv.) was added and stirring continued for 15 min at this same temperature. Dry carbon dioxide was then bubbled through the reaction mixture for 1 h at -78°C and and 15 min at rt. The reaction was quenched by addition of saturated aqueous NH<sub>4</sub>Cl and extracted with EtOAc (3X). The combined organic layers were dried over MgSO<sub>4</sub>, filtered, and evaporated to give crude product, which was purified by preparative HPLC (2.5% of EtOAc in hexane) to afford (*R*)-3-methyl-3-(phenylethynyl)isobenzofuran-1(3H)-one 71 % yield (26 mg), ee > 99%, [ $\alpha$ ]<sub>D</sub> = 94.6°, (c = 0.3, CHCl<sub>3</sub>). <sup>1</sup>H NMR (400 MHz, CDCl<sub>3</sub>)  $\delta$  7.90 (d, *J* = 7.7 Hz, 1H), 7.73 (t, *J* = 7.5 Hz, 1H), 7.53 – 7.65 (m, 2H), 7.41 (dd, *J* = 7.8 Hz, 1.6 Hz, 2H), 7.26 – 7.36 (m, 3H), 1.99 (s, 3H). <sup>13</sup>C NMR (101 MHz, CDCl<sub>3</sub>)  $\delta$  169.2, 152.2, 135.0, 132.1, 130.0, 129.3, 128.5, 126.0, 124.9, 121.9, 121.7, 86.8, 86.1, 79.5, 29.1; EI-MS(*m/z*): 219 [M – CO<sub>2</sub> – H]<sup>+</sup>. HPLC condition: Chiracel OD-H column, 1.0% isopropanol in hexane, 1 mL/min, T<sub>R</sub> = 14.7. (Racemic sample prepared analogously from the aryl bromide.)

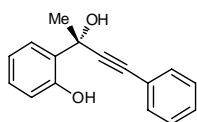

**(R)-2-(2-hydroxy-4-phenylbut-3-yn-2-yl)phenol 6.** To a solution of **2a** (0.14 mmol, 50 mg, 1.0 equiv.) in THF (5 mL) was added MeLi (0.16 mmol, 100  $\mu$ L, 1.6 M solution in Et<sub>2</sub>O, 1.15 equiv) at -78 °C. After the reaction mixture had been stirred for 10 min at -78 °C, *tert*-BuLi (0.28 mmol, 165  $\mu$ L, 1.7 M in pentane, 2.0 equiv.) was added and stirring continued for 25 min at this same temperature. Oxygen was then bubbled through the reaction mixture for 1 h at -78°C and and 15 min at rt. The reaction was quenched by addition of saturated aqueous NH<sub>4</sub>Cl and extracted with EtOAc (3X). The combined organic layers were dried over MgSO<sub>4</sub>, filtered, and evaporated to give crude product, which was purified by flash chromatography (toluene/hexanes, 90:10) to afford (*R*)-2-(2-hydroxy-4-phenylbut-3-yn-2-yl)phenol in 74% yield (24 mg), [ $\alpha$ ]<sub>D</sub> = -30°, (c = 0.8 Acetone). <sup>1</sup>H NMR (400 MHz, CDCl<sub>3</sub>)  $\delta$  8.31 (s, 1H), 7.55 (dd, *J* = 7.8 Hz, 1.6 Hz, 1H), 7.52 – 7.45 (m, 2H), 7.32 – 7.41 (m, 3H), 7.19 – 7.24 (m, 1H), 6.79 – 7.00 (m, 2H), 3.14 (bs, 1H), 1.95 (s, 3H). <sup>13</sup>C NMR (101 MHz, C<sub>6</sub>D<sub>6</sub>)  $\delta$  156.4, 132.4, 130.4, 129.3, 129.0, 127.6, 123.1, 120.2, 118.7, 91.7, 86.9, 73.5, 31.5; EI-MS(*m/z*): 221 [M – OH]<sup>+</sup>, 220 [M – H<sub>2</sub>O]<sup>+</sup>.

### Synthesis of (*S,S*)-1-(5',5'-dimethyl-4'-phenylhexa-2',3'-dien-2'-yl)-2-*p*-tolylsulfinyl-4-trifluoromethyl-benzene. Scheme 2.

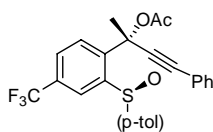

**(*S,S*, *R*)-2-(4'-trifluoromethyl-2'-(*p*-tolylsulfinyl)phenyl)-4-phenylbut-3-yn-2-yl acetate.** A mixture of (*S,S*, *R*)-2-(4'-trifluoromethyl-2'-(*p*-tolylsulfinyl)phenyl)-4-phenylbut-3-yn-2-ol (200mg, 0.47mmol), Ac<sub>2</sub>O (305mg, 3.0mmol), Et<sub>3</sub>N (223mg, 2.2mmol) and DMAP (3mg, 0.024mmol) in CH<sub>2</sub>Cl<sub>2</sub> (2ml) was stirred at rt overnight. The reaction solution was concentrated under reduced pressure and the residue was purified by flash chromatography on silica gel (hexane/ethyl acetate, 10/1) to afford the title compound in 99% yield (217mg). [ $\alpha$ ]<sub>D</sub><sup>26</sup> -140.0° (c=0.2, CHCl<sub>3</sub>); <sup>1</sup>H NMR (400 MHz, CDCl<sub>3</sub>)  $\delta$ : 8.32 (s, 1H), 7.86 (d, *J* = 8.0 Hz, 1H), 7.75 (d, *J* = 8.0 Hz, 1H), 7.49-7.52 (m, 2H), 7.36-7.38 (m, 2H), 7.19-7.33 (m, 5H), 2.38 (s, 3H), 2.20 (s, 3H), 1.83 (s, 3H); <sup>13</sup>C NMR (100 MHz, CDCl<sub>3</sub>)  $\delta$ : 168.8, 145.1, 144.1, 142.1, 142.0, 132.1, 130.2, 129.3, 128.5, 128.2 (q, *J* = 4.0 Hz), 127.3, 126.8, 124.6, 123.2 (q, *J*<sub>CF<sub>3</sub></sub> = 271.0 Hz), 121.7, 88.8, 88.6, 75.9, 31.0, 22.1, 21.6. EI-MS (*m/z*): 470 [M]<sup>+</sup>.

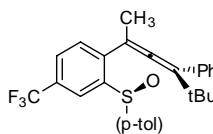

**(*S,S,S*)-1-(5',5'-dimethyl-4'-phenylhexa-2',3'-dien-2'-yl)-2-*p*-tolylsulfinyl-4-trifluoromethyl-benzene 7.** To a stirred suspension of CuCN (400mg, 4.5mmol) in anhydrous THF (10ml) at -42 °C (CH<sub>3</sub>CN-dry ice) under N<sub>2</sub> was added <sup>t</sup>BuLi solution (2.4ml, 1.7M in pentane). The resulting solution was stirred another 10 min before a solution of (*S,S*, *R*)-2-(4'-trifluoromethyl-2'-(*p*-tolylsulfinyl)phenyl)-4-phenylbut-3-yn-2-yl acetate in anhydrous THF (6ml) was added. The reaction mixture was stirred for 1h under the same conditions. Sat. NH<sub>4</sub>Cl aq. was added to quench the reaction. The water layer was extracted by Et<sub>2</sub>O. The combined organic layer was concentrated under reduced pressure and the residue was purified by silica gel chromatography (hexane/ethyl acetate, 10/1) to afford the title compound in 97% yield (202mg). [ $\alpha$ ]<sub>D</sub><sup>26</sup> -256.0° (c = 0.1, CHCl<sub>3</sub>); <sup>1</sup>H NMR (400 MHz, CDCl<sub>3</sub>)  $\delta$ : 8.43 (d, *J* = 1.6 Hz, 1H), 7.65 (dd, *J*<sub>1</sub> = 1.6 Hz, *J*<sub>2</sub> = 8.0 Hz, 1H), 7.41-7.44 (m, 2H), 7.32-7.36 (m, 2H), 7.27-7.29 (m, 2H), 6.98 (d, *J* = 8.0 Hz, 2H), 6.70 (d, *J* = 8.0 Hz, 2H), 2.24 (s, 3H), 1.53 (s, 3H), 1.05 (s, 9H); <sup>13</sup>C NMR (101 MHz, CDCl<sub>3</sub>)  $\delta$ : 200.4, 144.9, 142.2, 141.7, 141.6, 135.1, 130.5, 130.2 (q, *J* = 33.0 Hz), 129.9, 128.6, 128.1, 127.5, 127.3, 127.2 (q, *J* = 4.0 Hz), 124.0 (q, *J*<sub>CF<sub>3</sub></sub> = 270.2 Hz), 121.8 (q, *J*<sub>CF<sub>3</sub></sub> = 4.0 Hz), 117.8, 97.3, 35.7, 29.5, 21.6, 20.7. EI-MS (*m/z*): 468 [M]<sup>+</sup>.

- 
- 2 Novodomska, A.; Dudicova, M.; Leroux, F. R.; Colobert, F. *Tetrahedron: Asymmetry* **2007**, *18*, 1628-1634.
- 3 (a) Lu, G.; Li, X.; Li, Y.-M.; Kwong, F. Y.; C., A., S. C. *Adv. Synth Catal.* **2006**, *348*, 1926-1933. (b) Liu, L.; Kang, Y.-F.; Wang, R.; Zhou, Y.; Chen, C.; Ni, M.; Gong, M. *Tetrahedron: Asymmetry*, **2004**, *15*, 3757-3761. (c) Cozzi, P. G.; Alesi, S. *Chem. Commun.* **2004**, 2448-2449. (d) Saito, B.; Katsuki, T. *Synlett* **2004**, 1557-1560. (e) Lu, G.; Li, X.; Jia, X.; Chan, W, L.; Chan, A., S., C. *Angew. Chem., Int. Ed.* **2003**, *42*, 5057-5058.
- 4 (a) Forrat, V., J.; Prieto, O.; Ramon, D, J.; Yus, M. *Chem. Eur JI* **2006**, *12*, 4431-4445. (b) Forrat, V, J.; Ramon, D.; Yus, M. *Tetrahedron: Asymmetry* **2008**, *19*, 537-541.

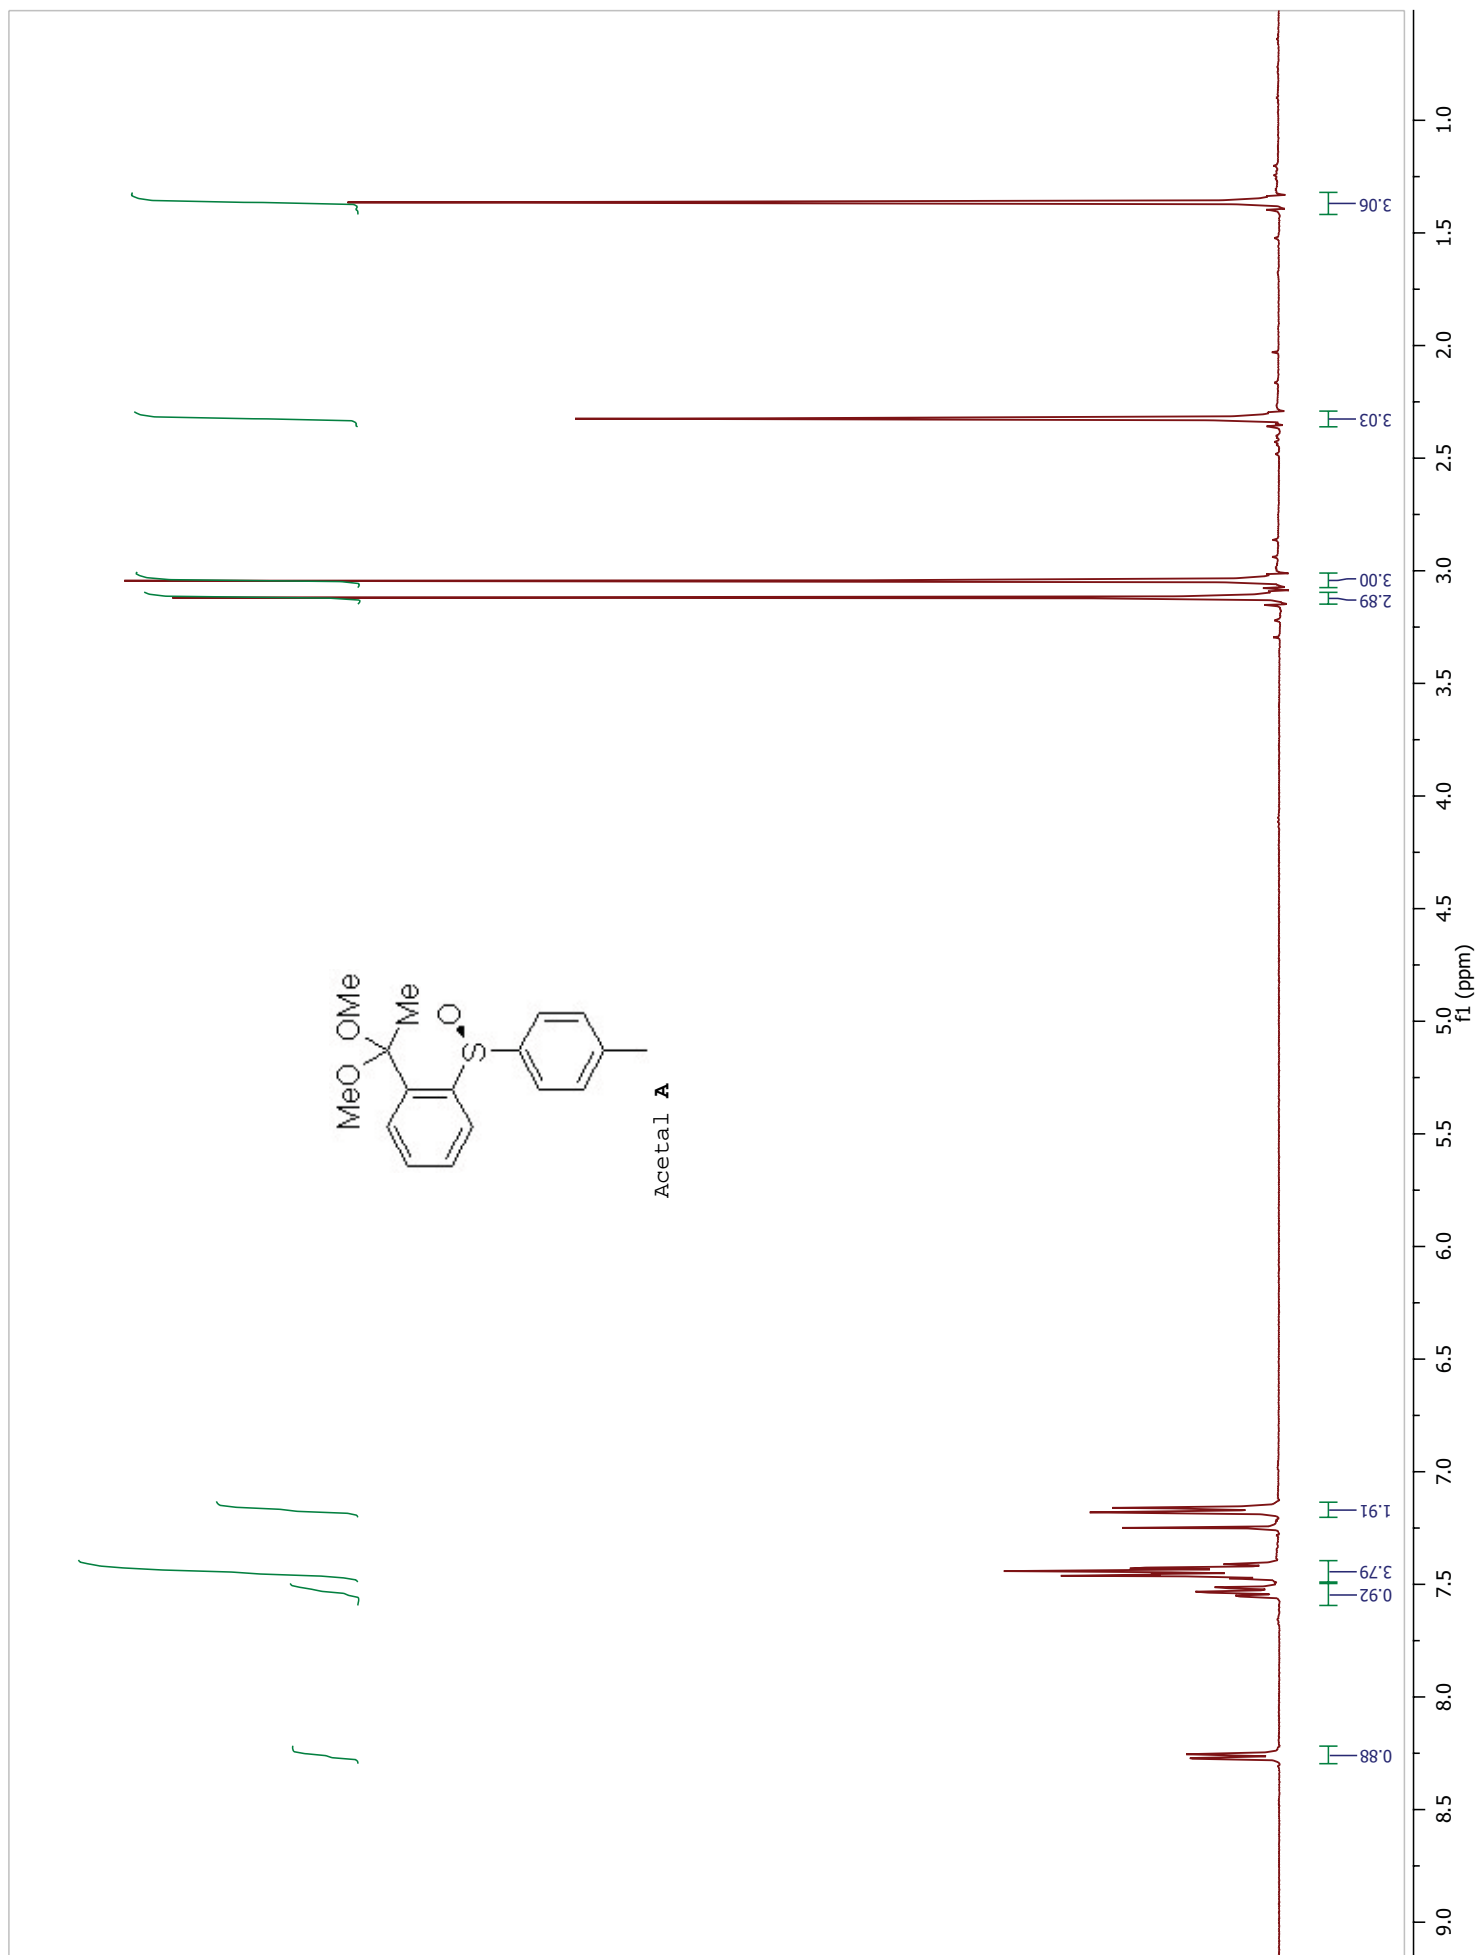

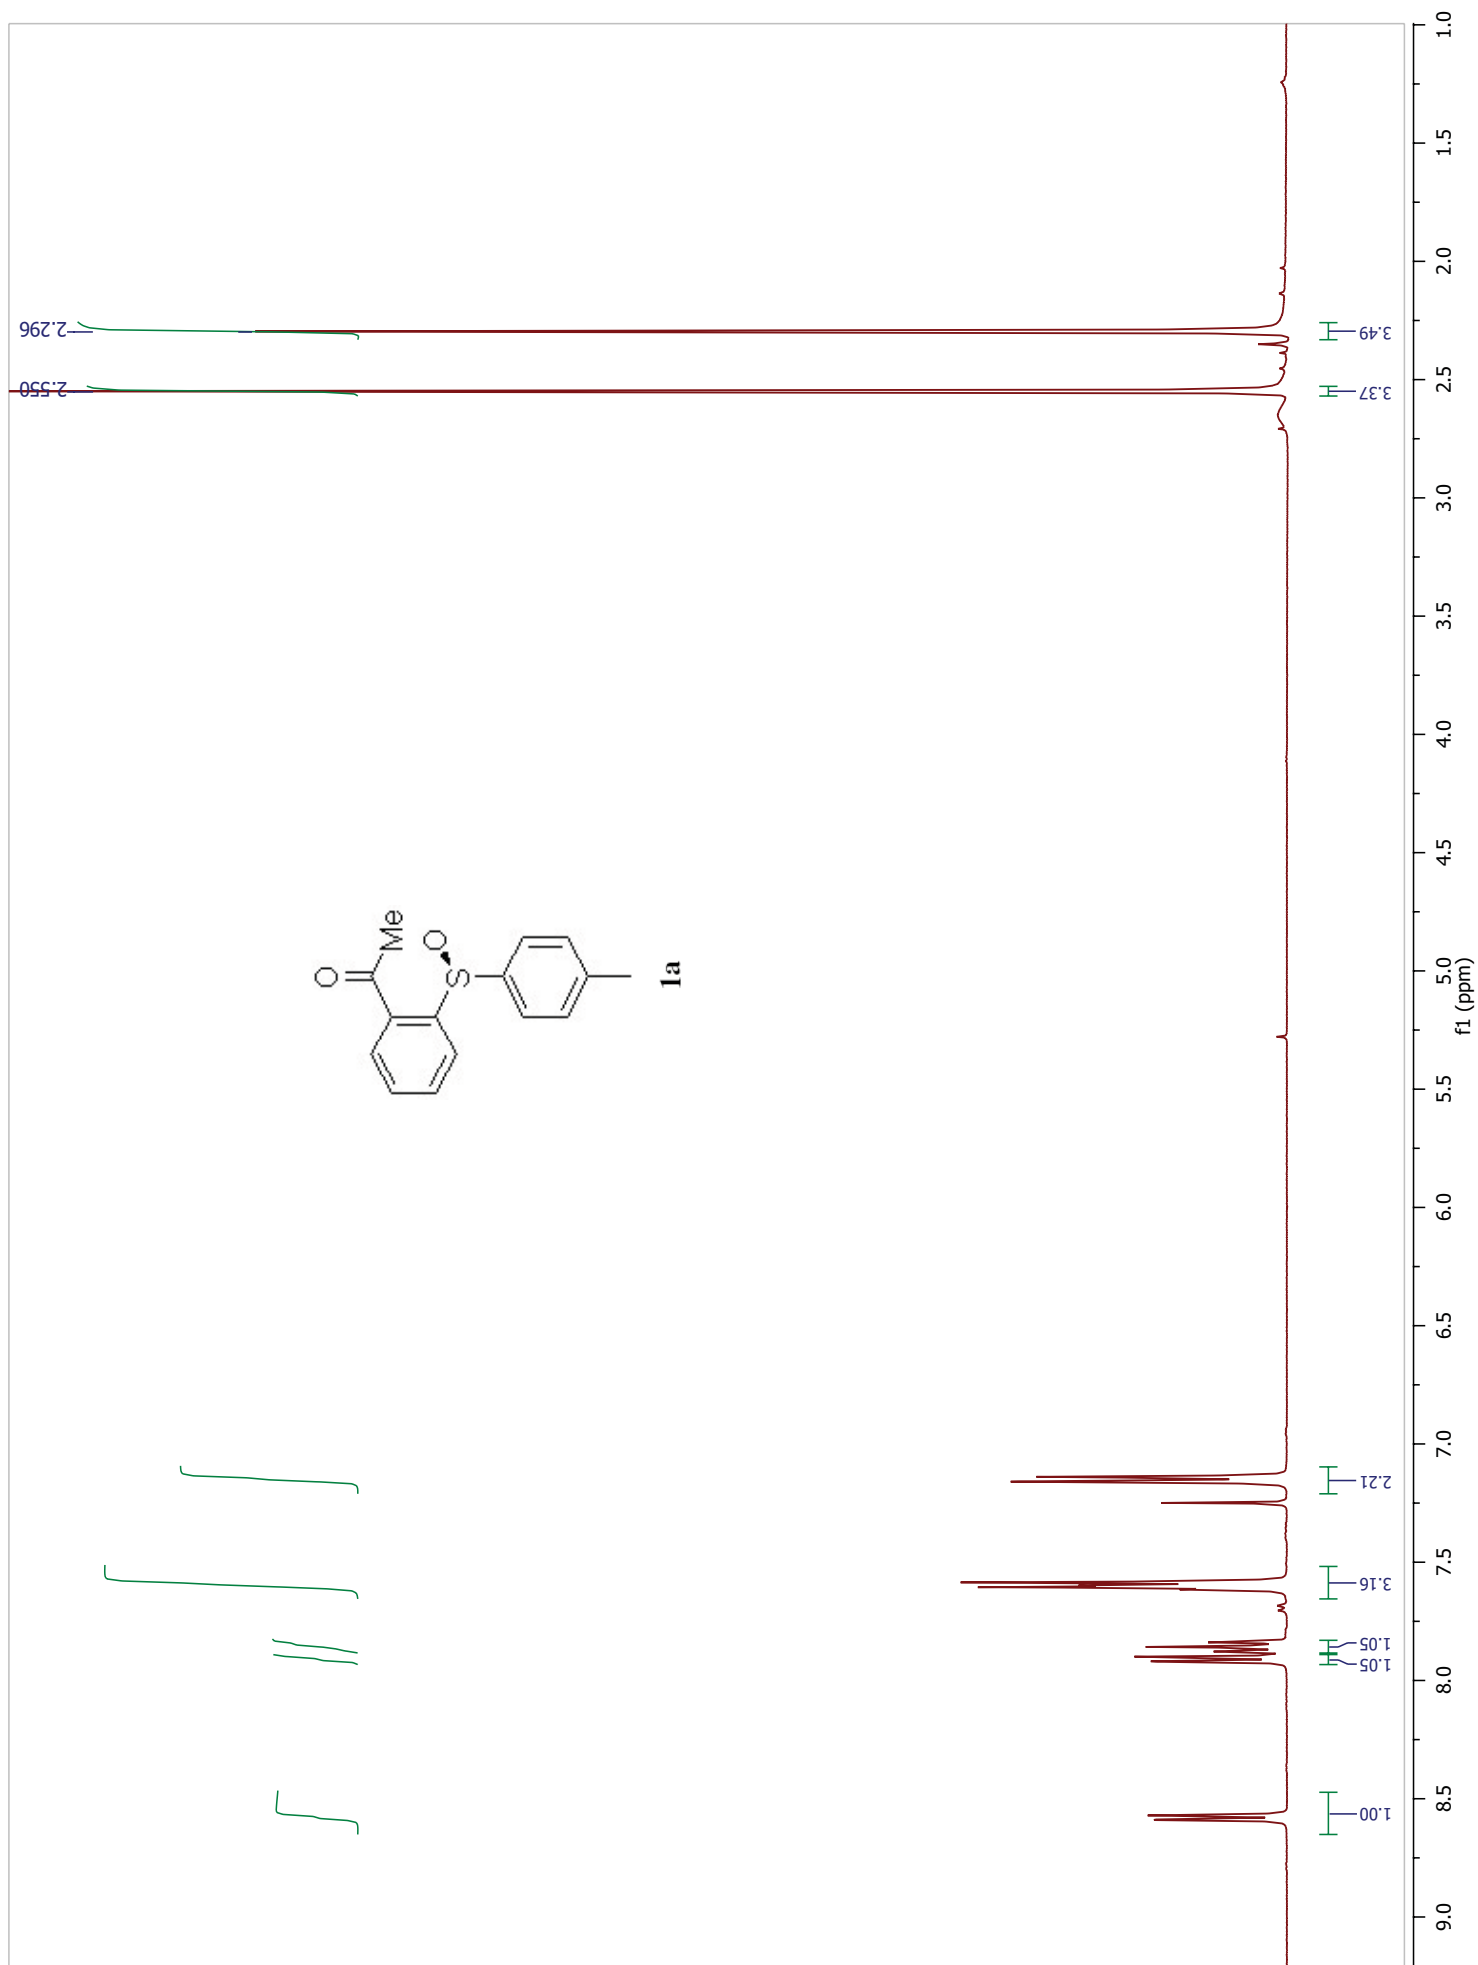

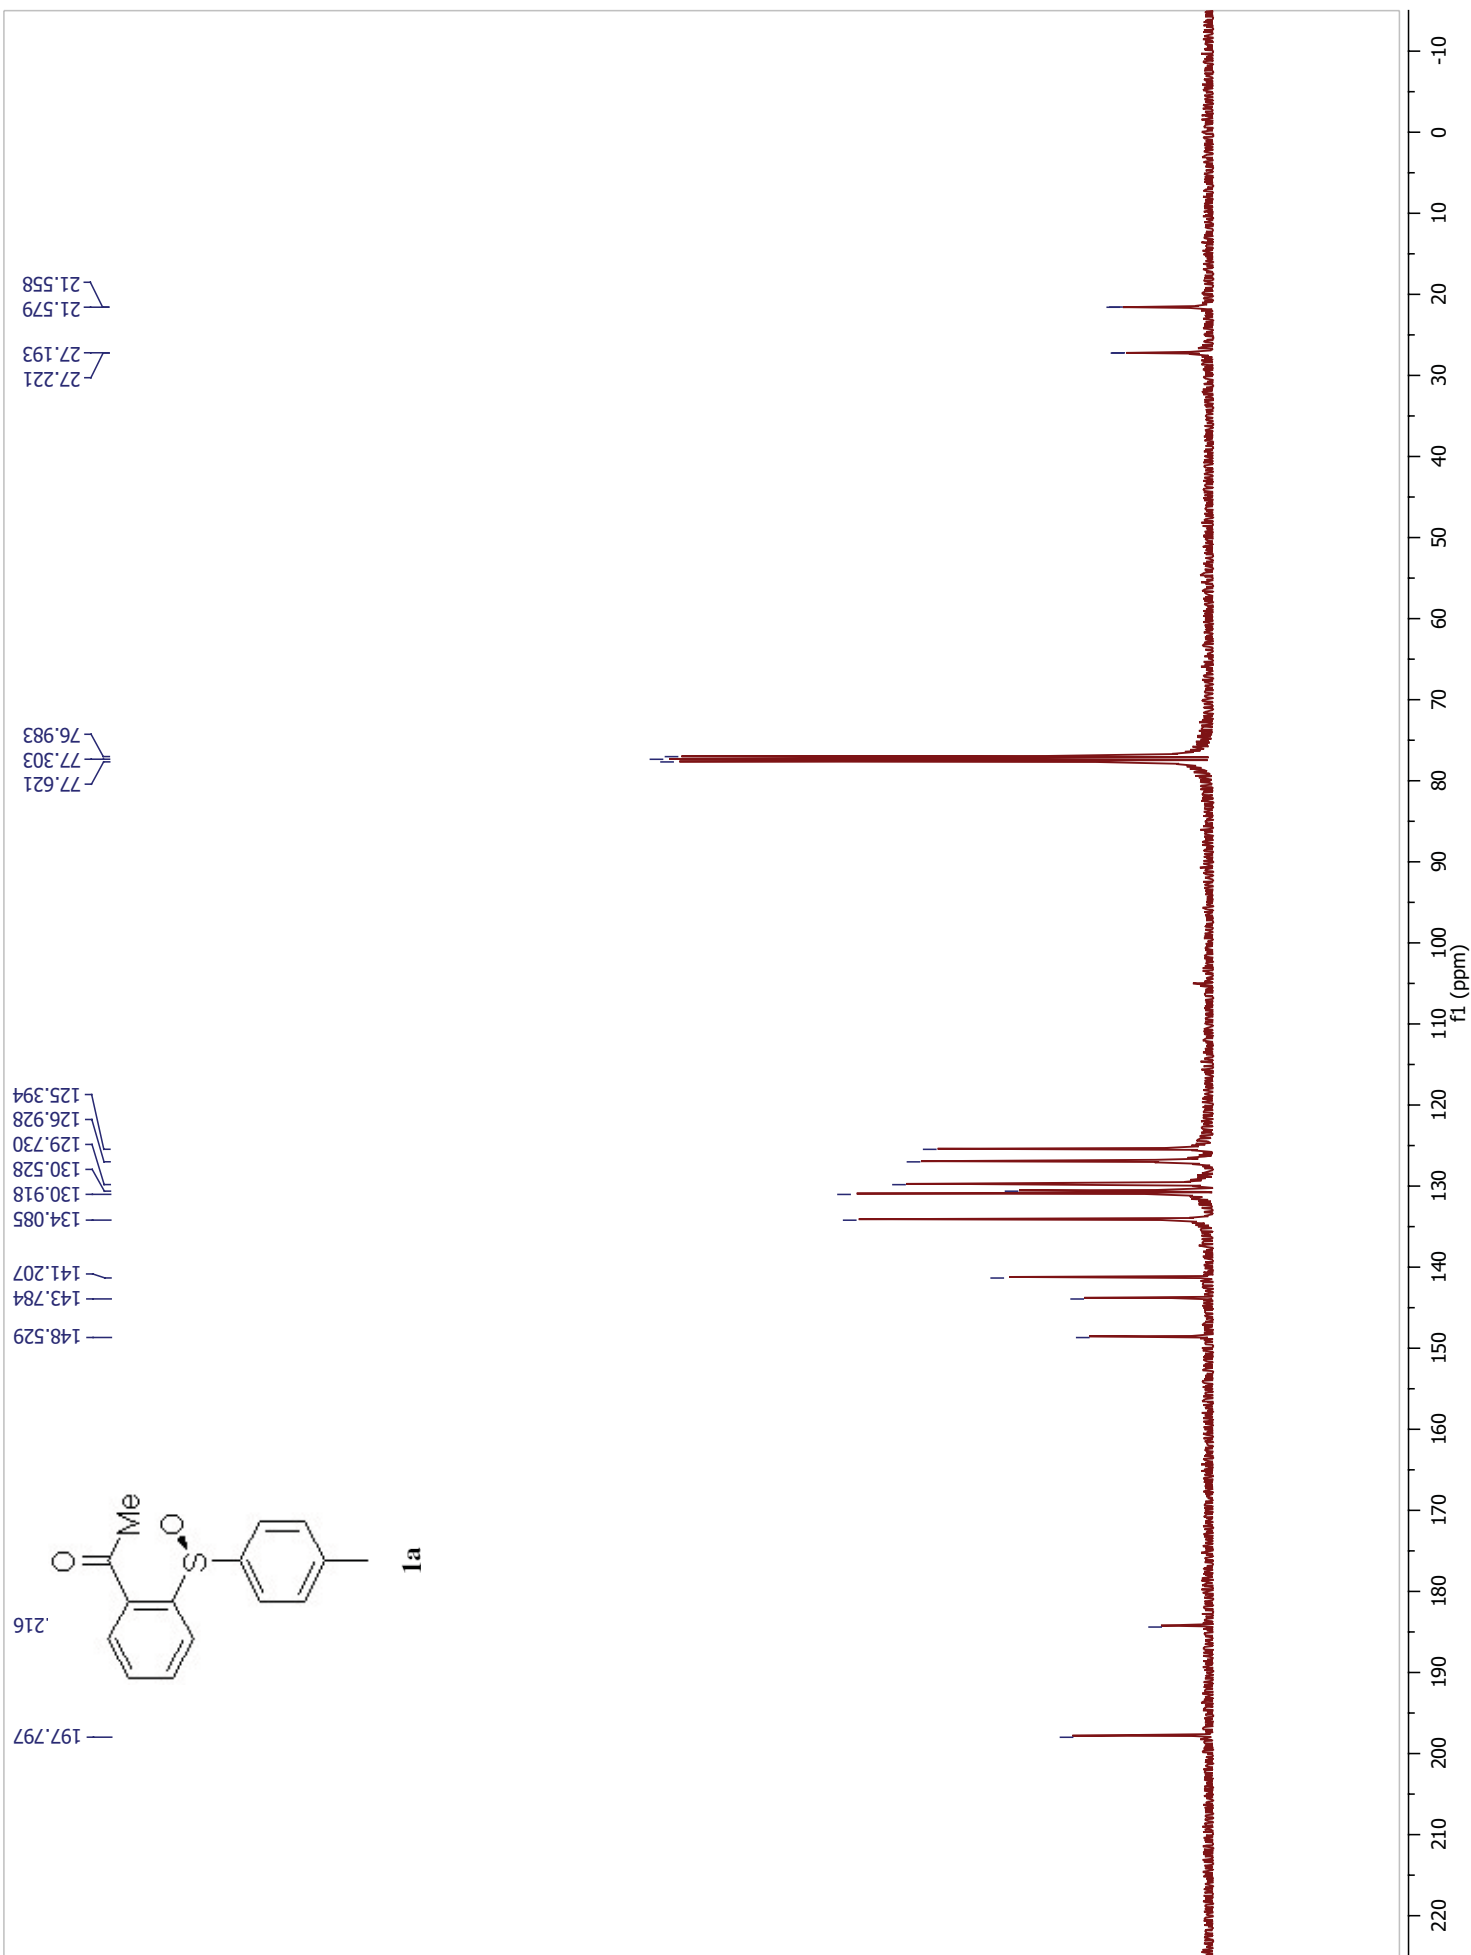

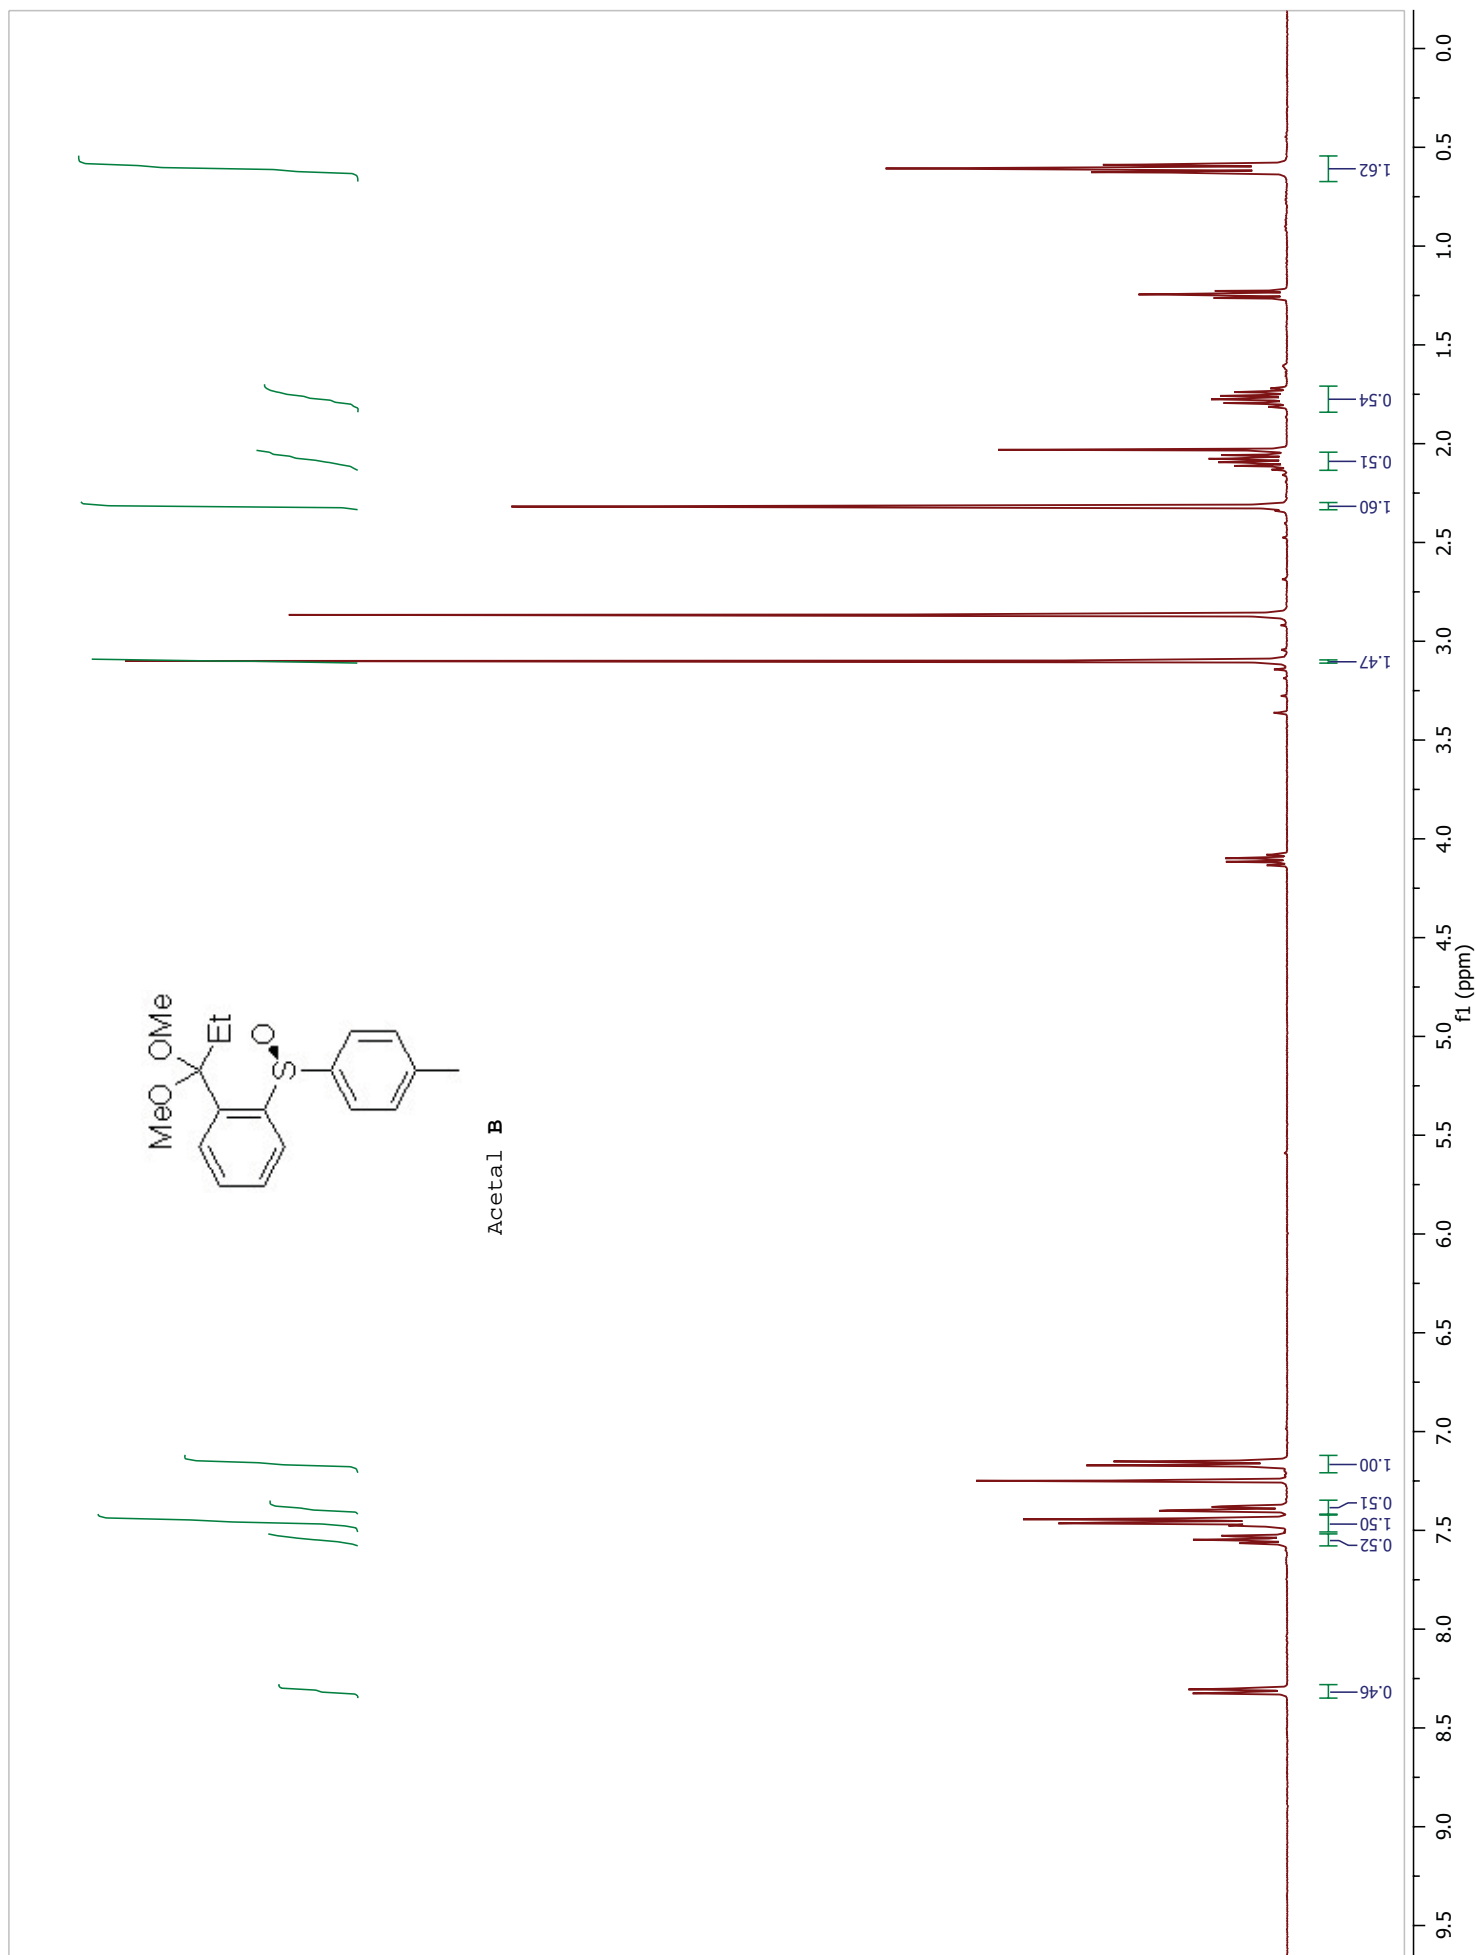



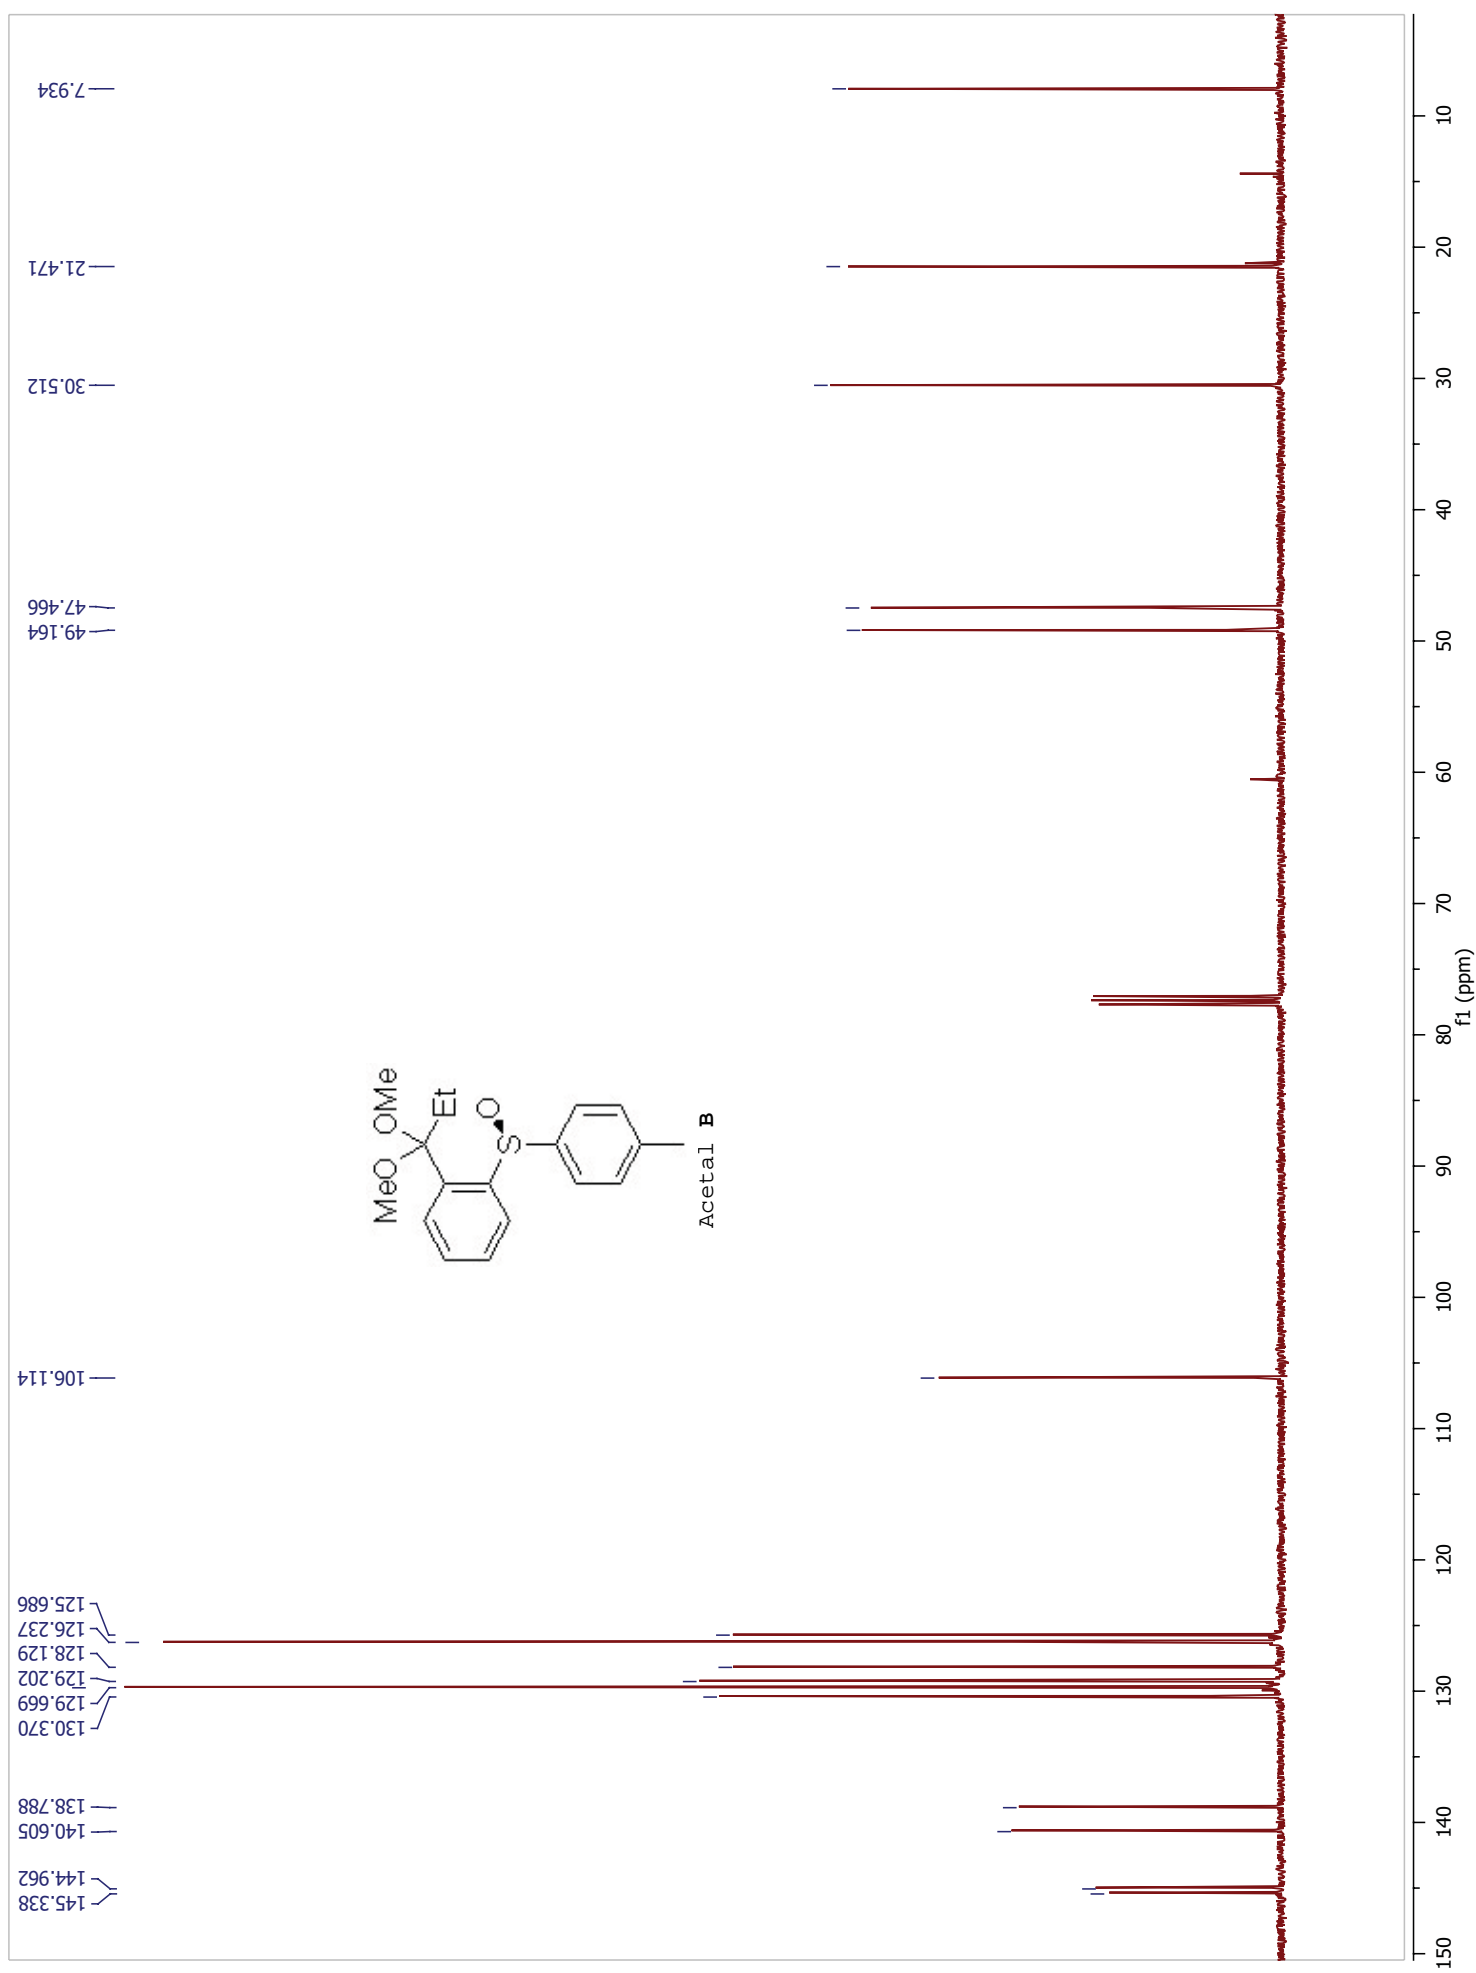

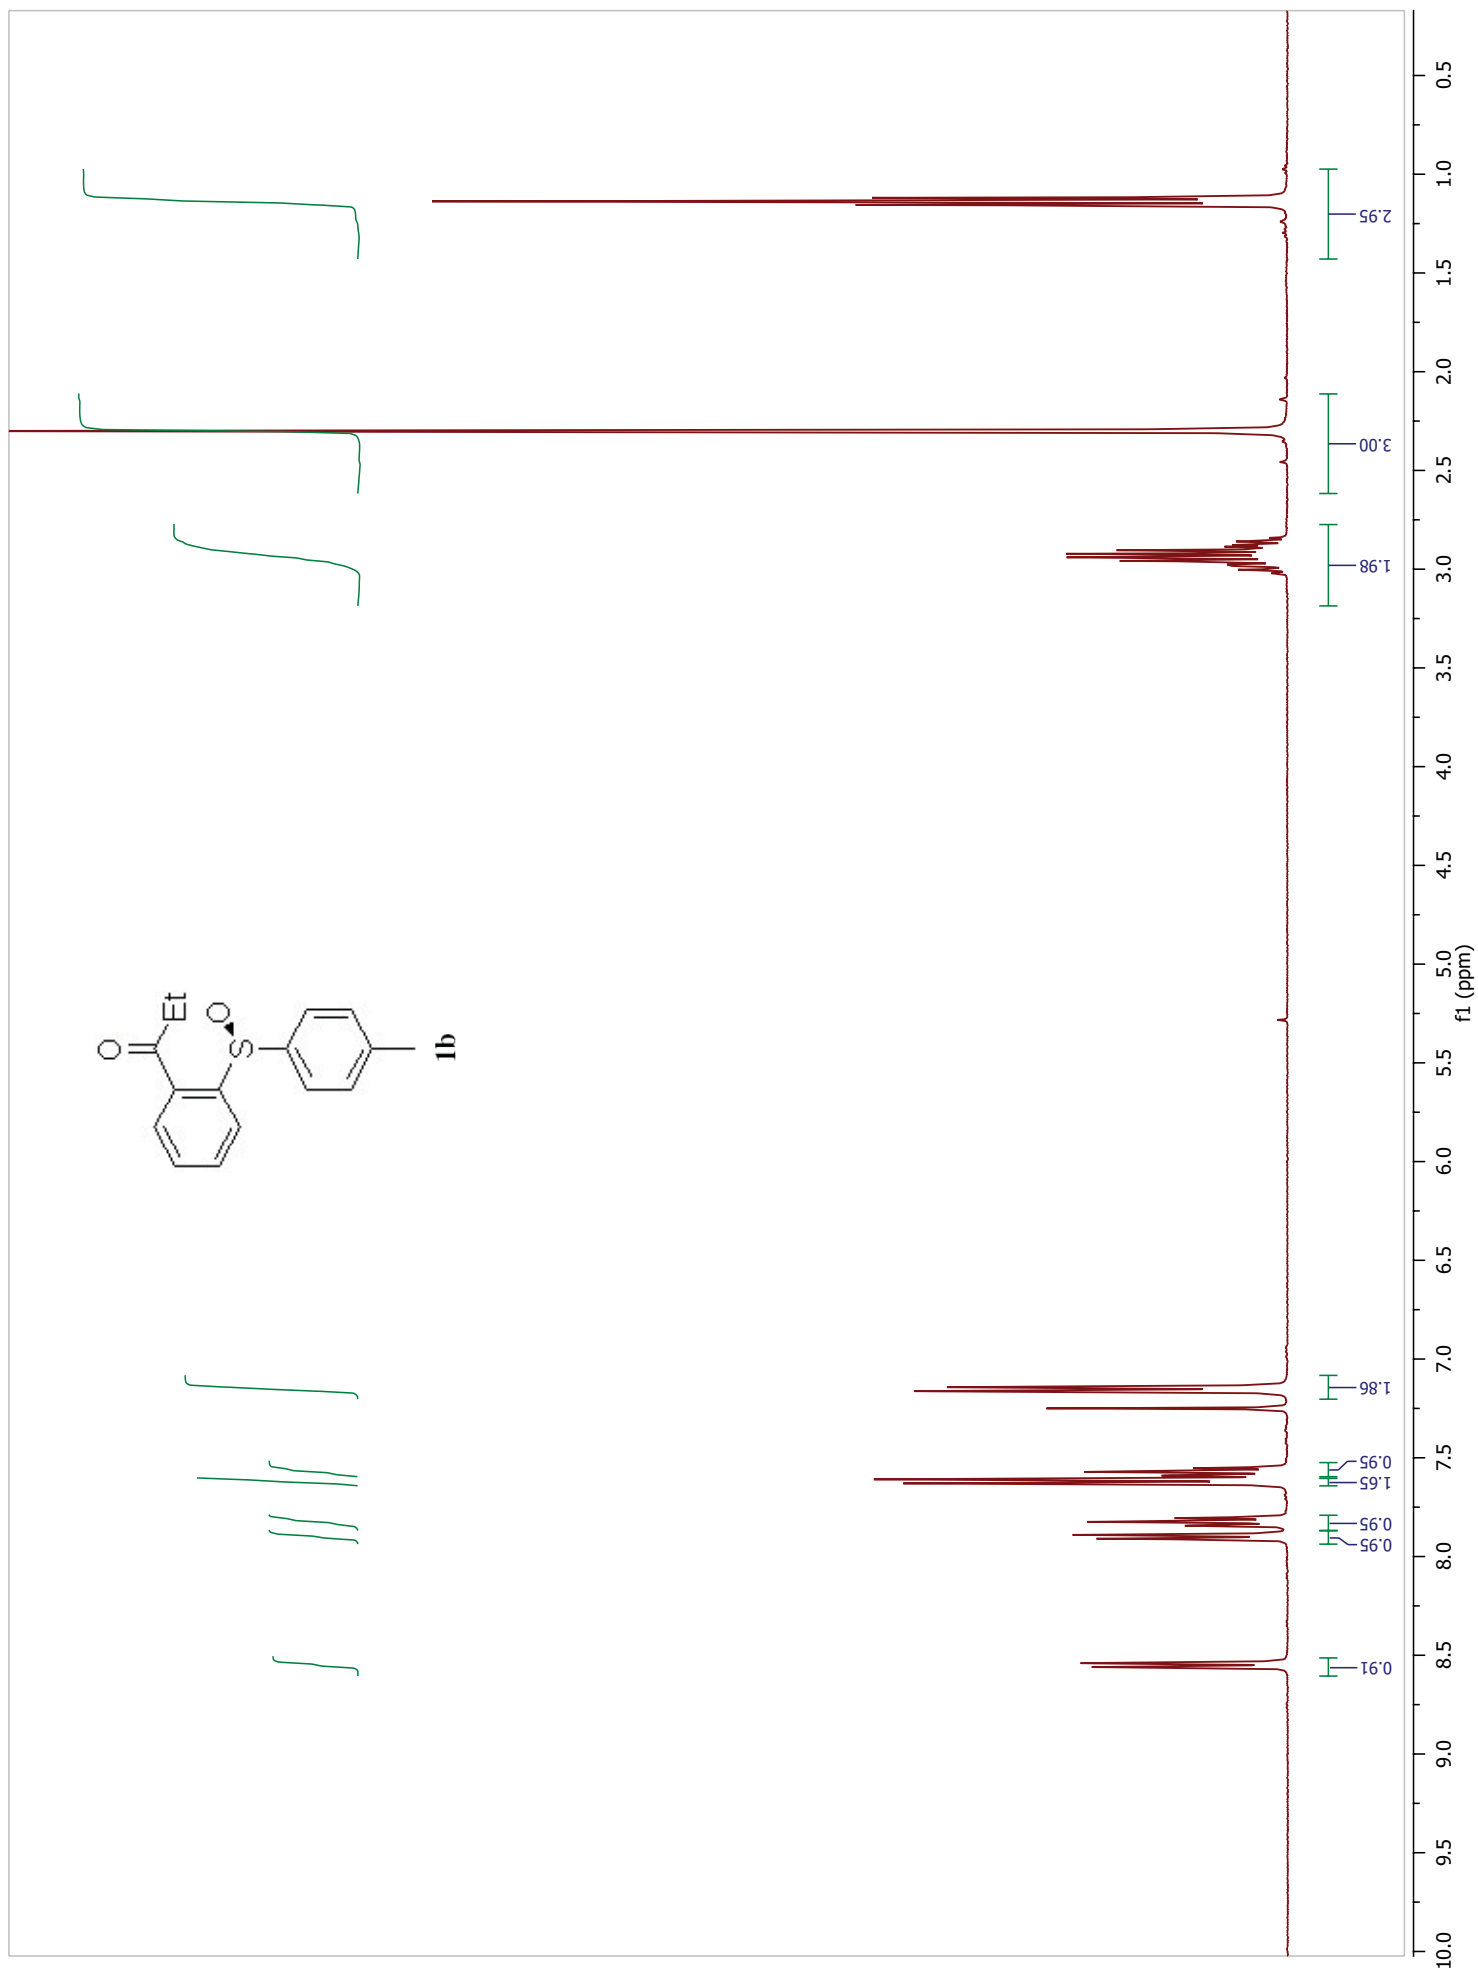

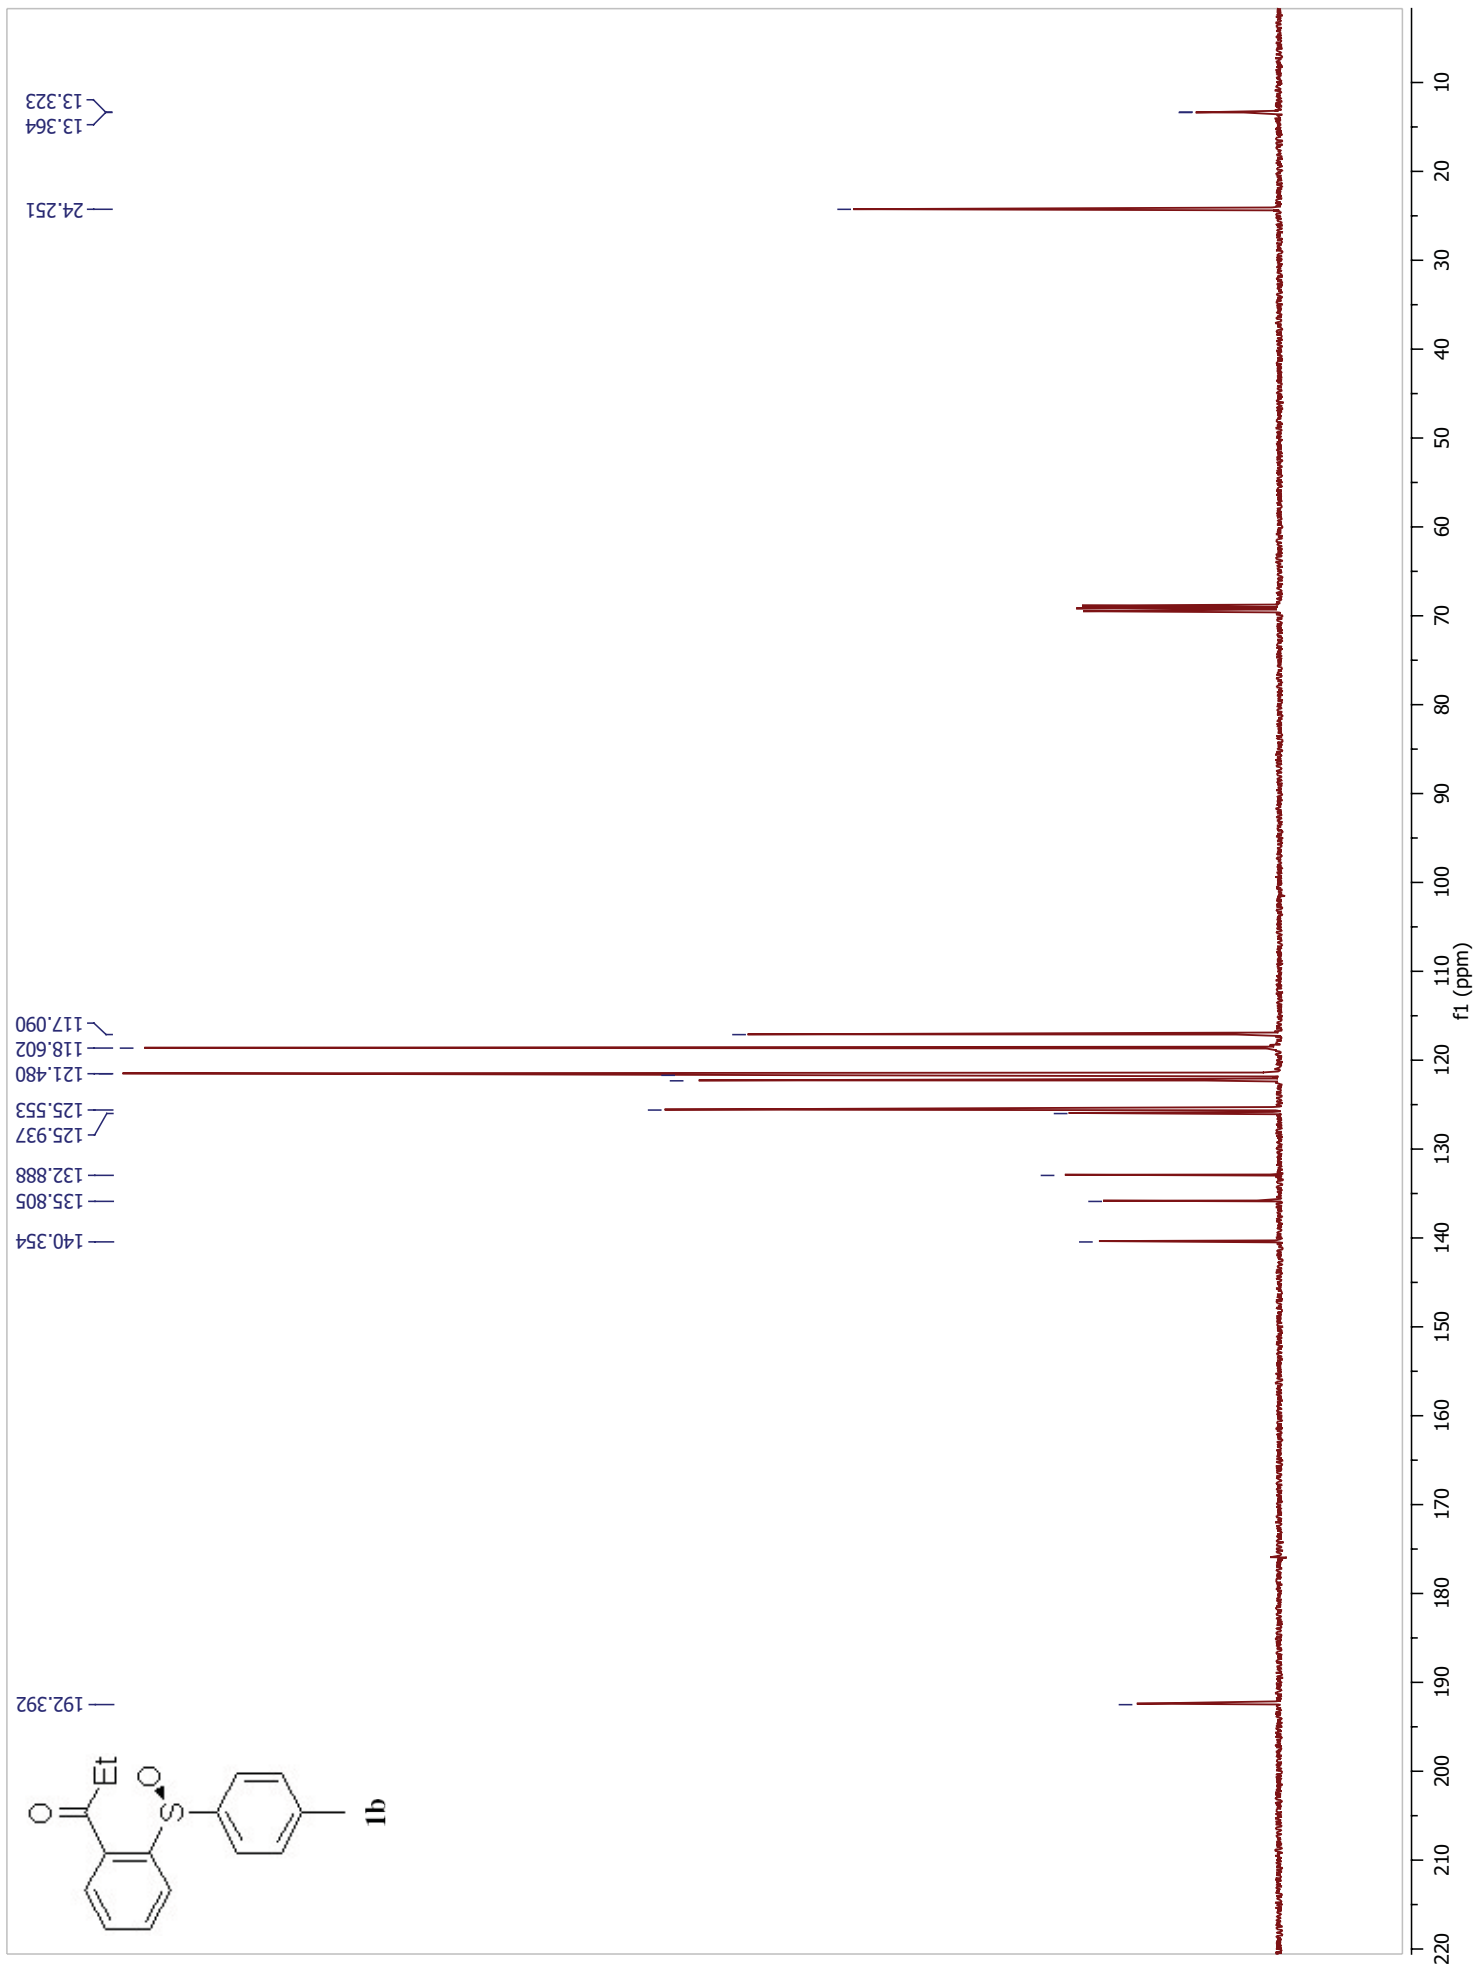

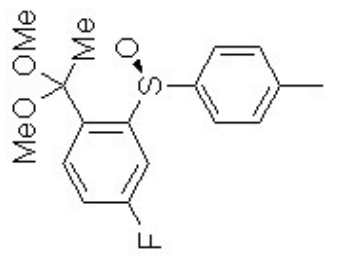

Acetal C

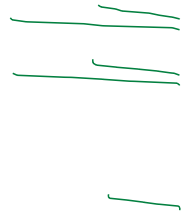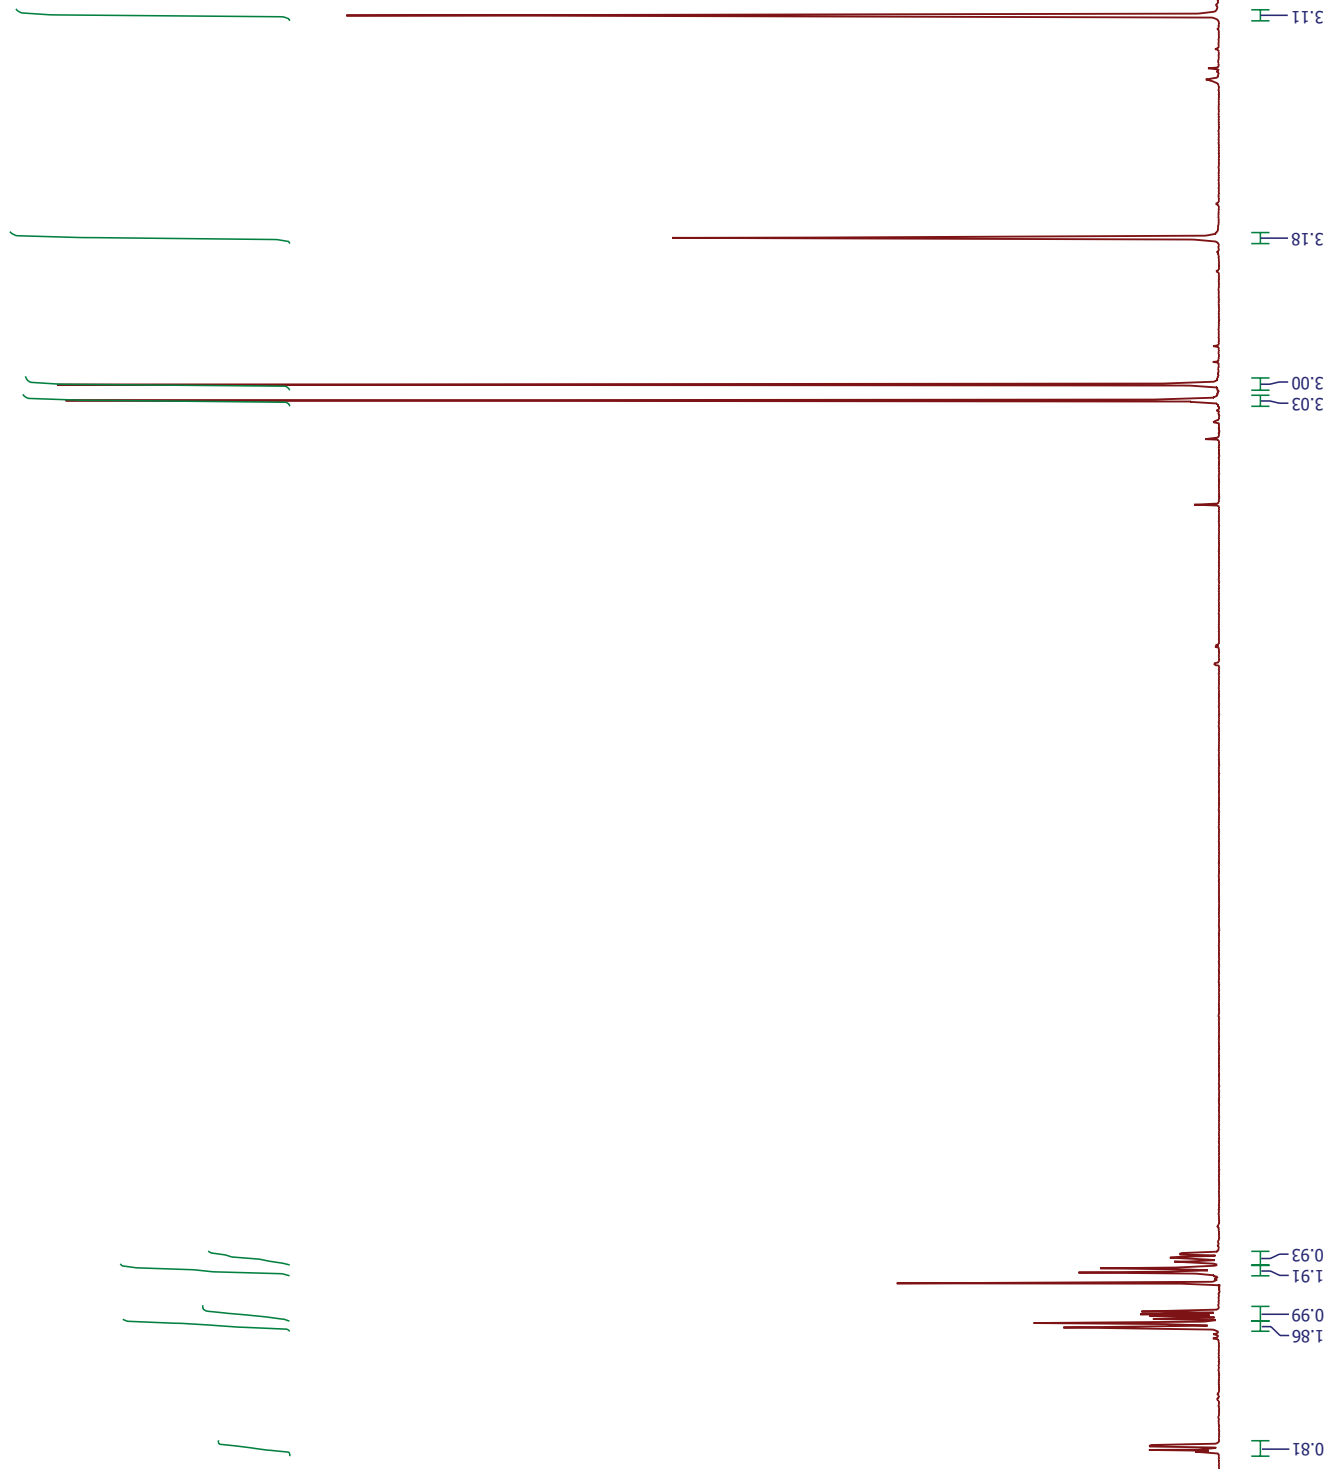

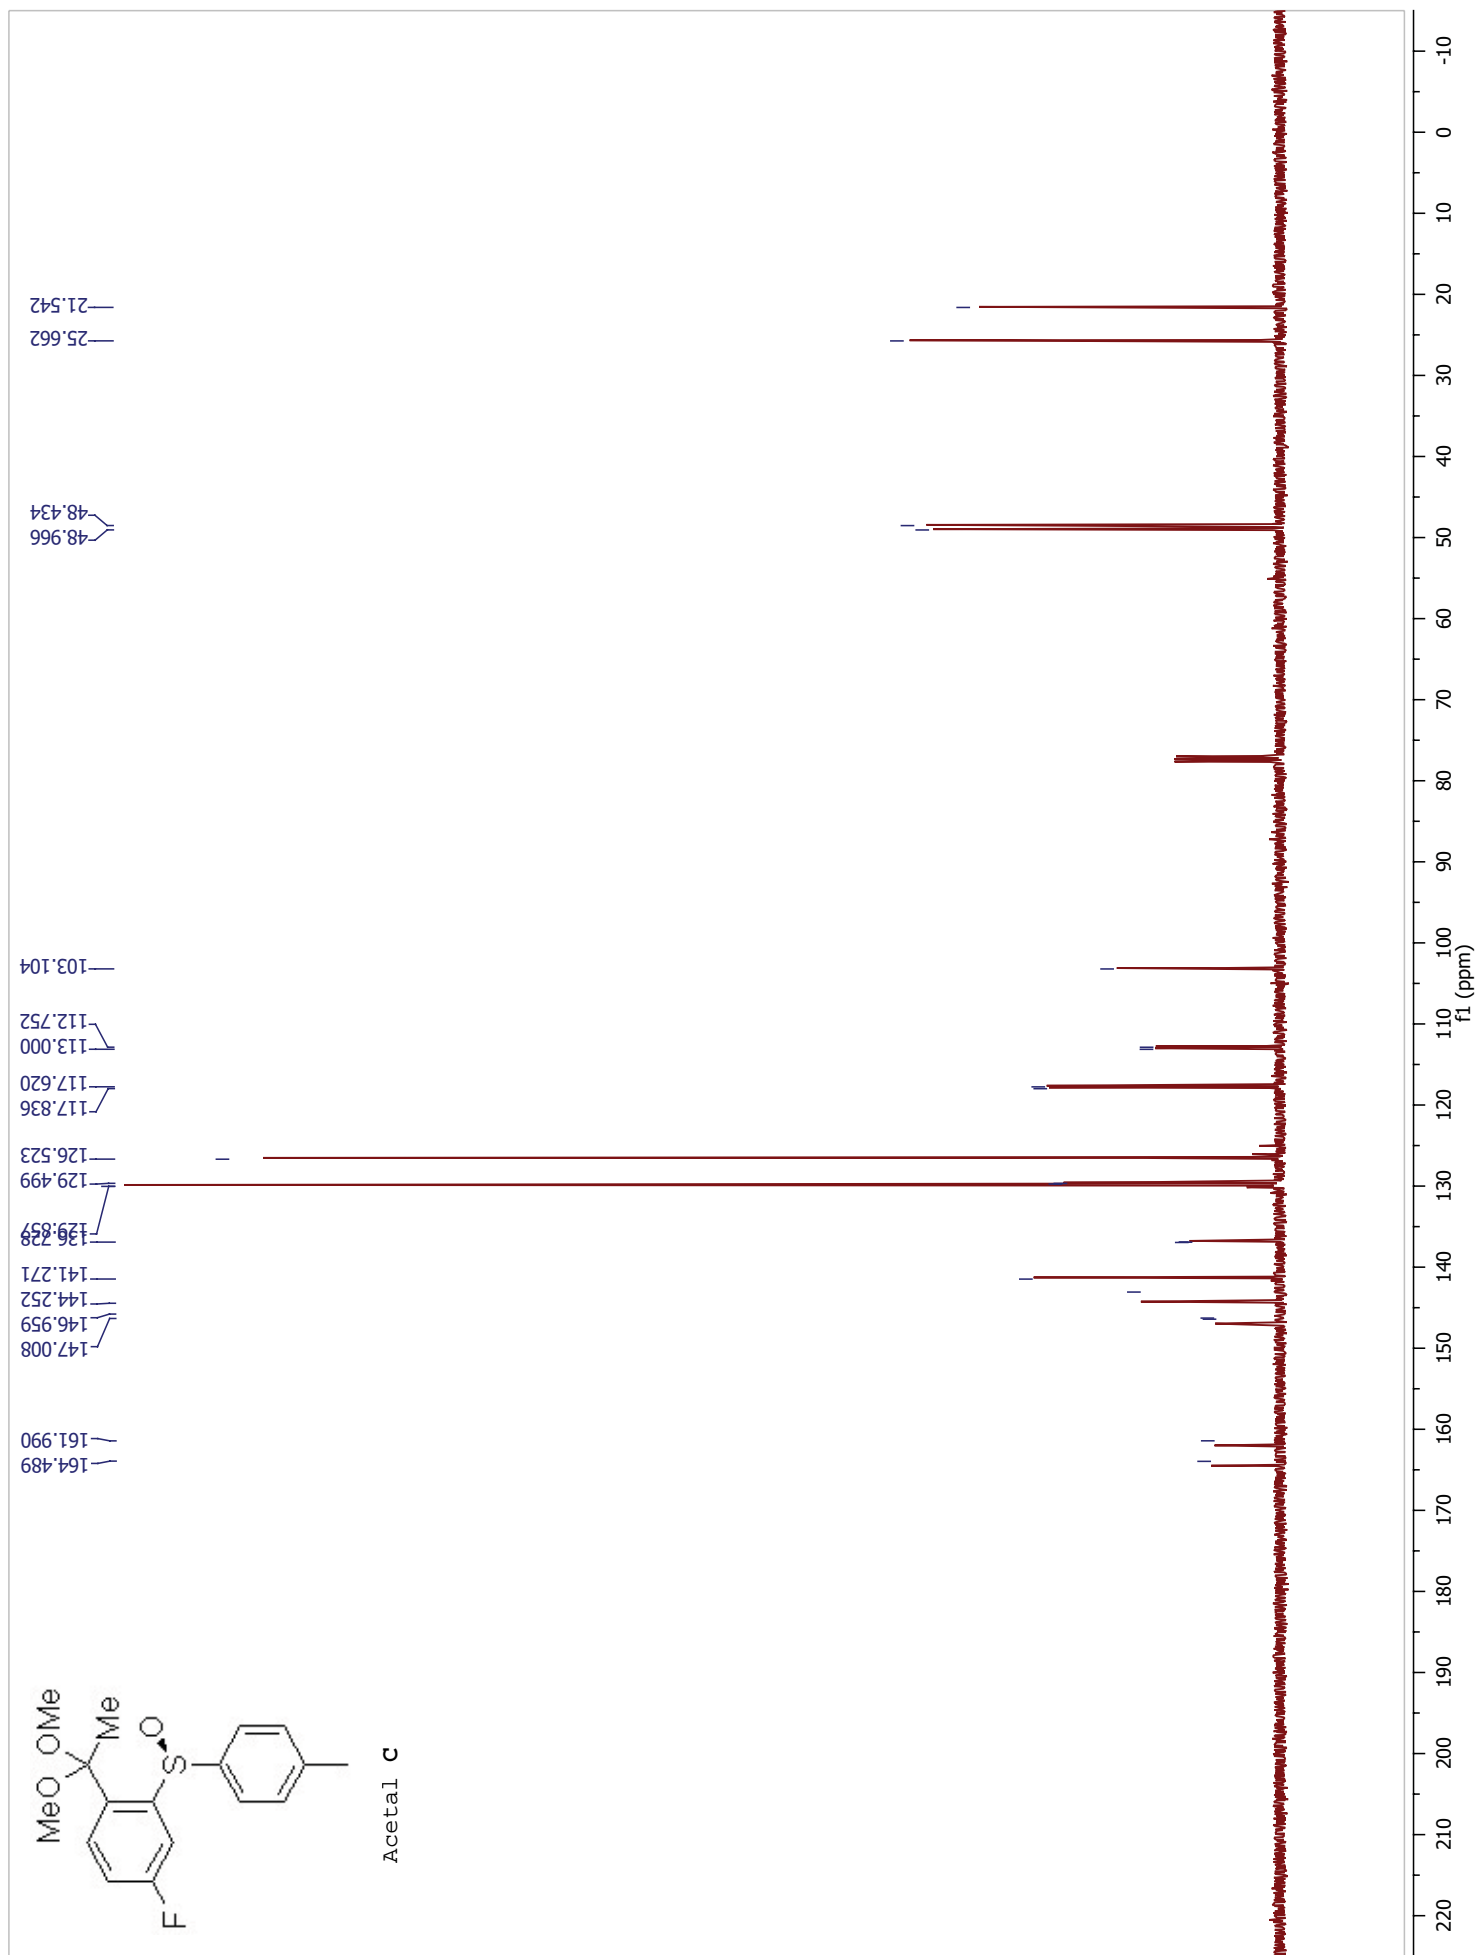

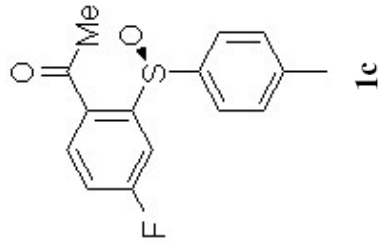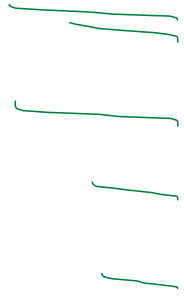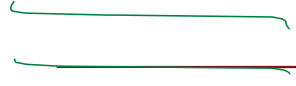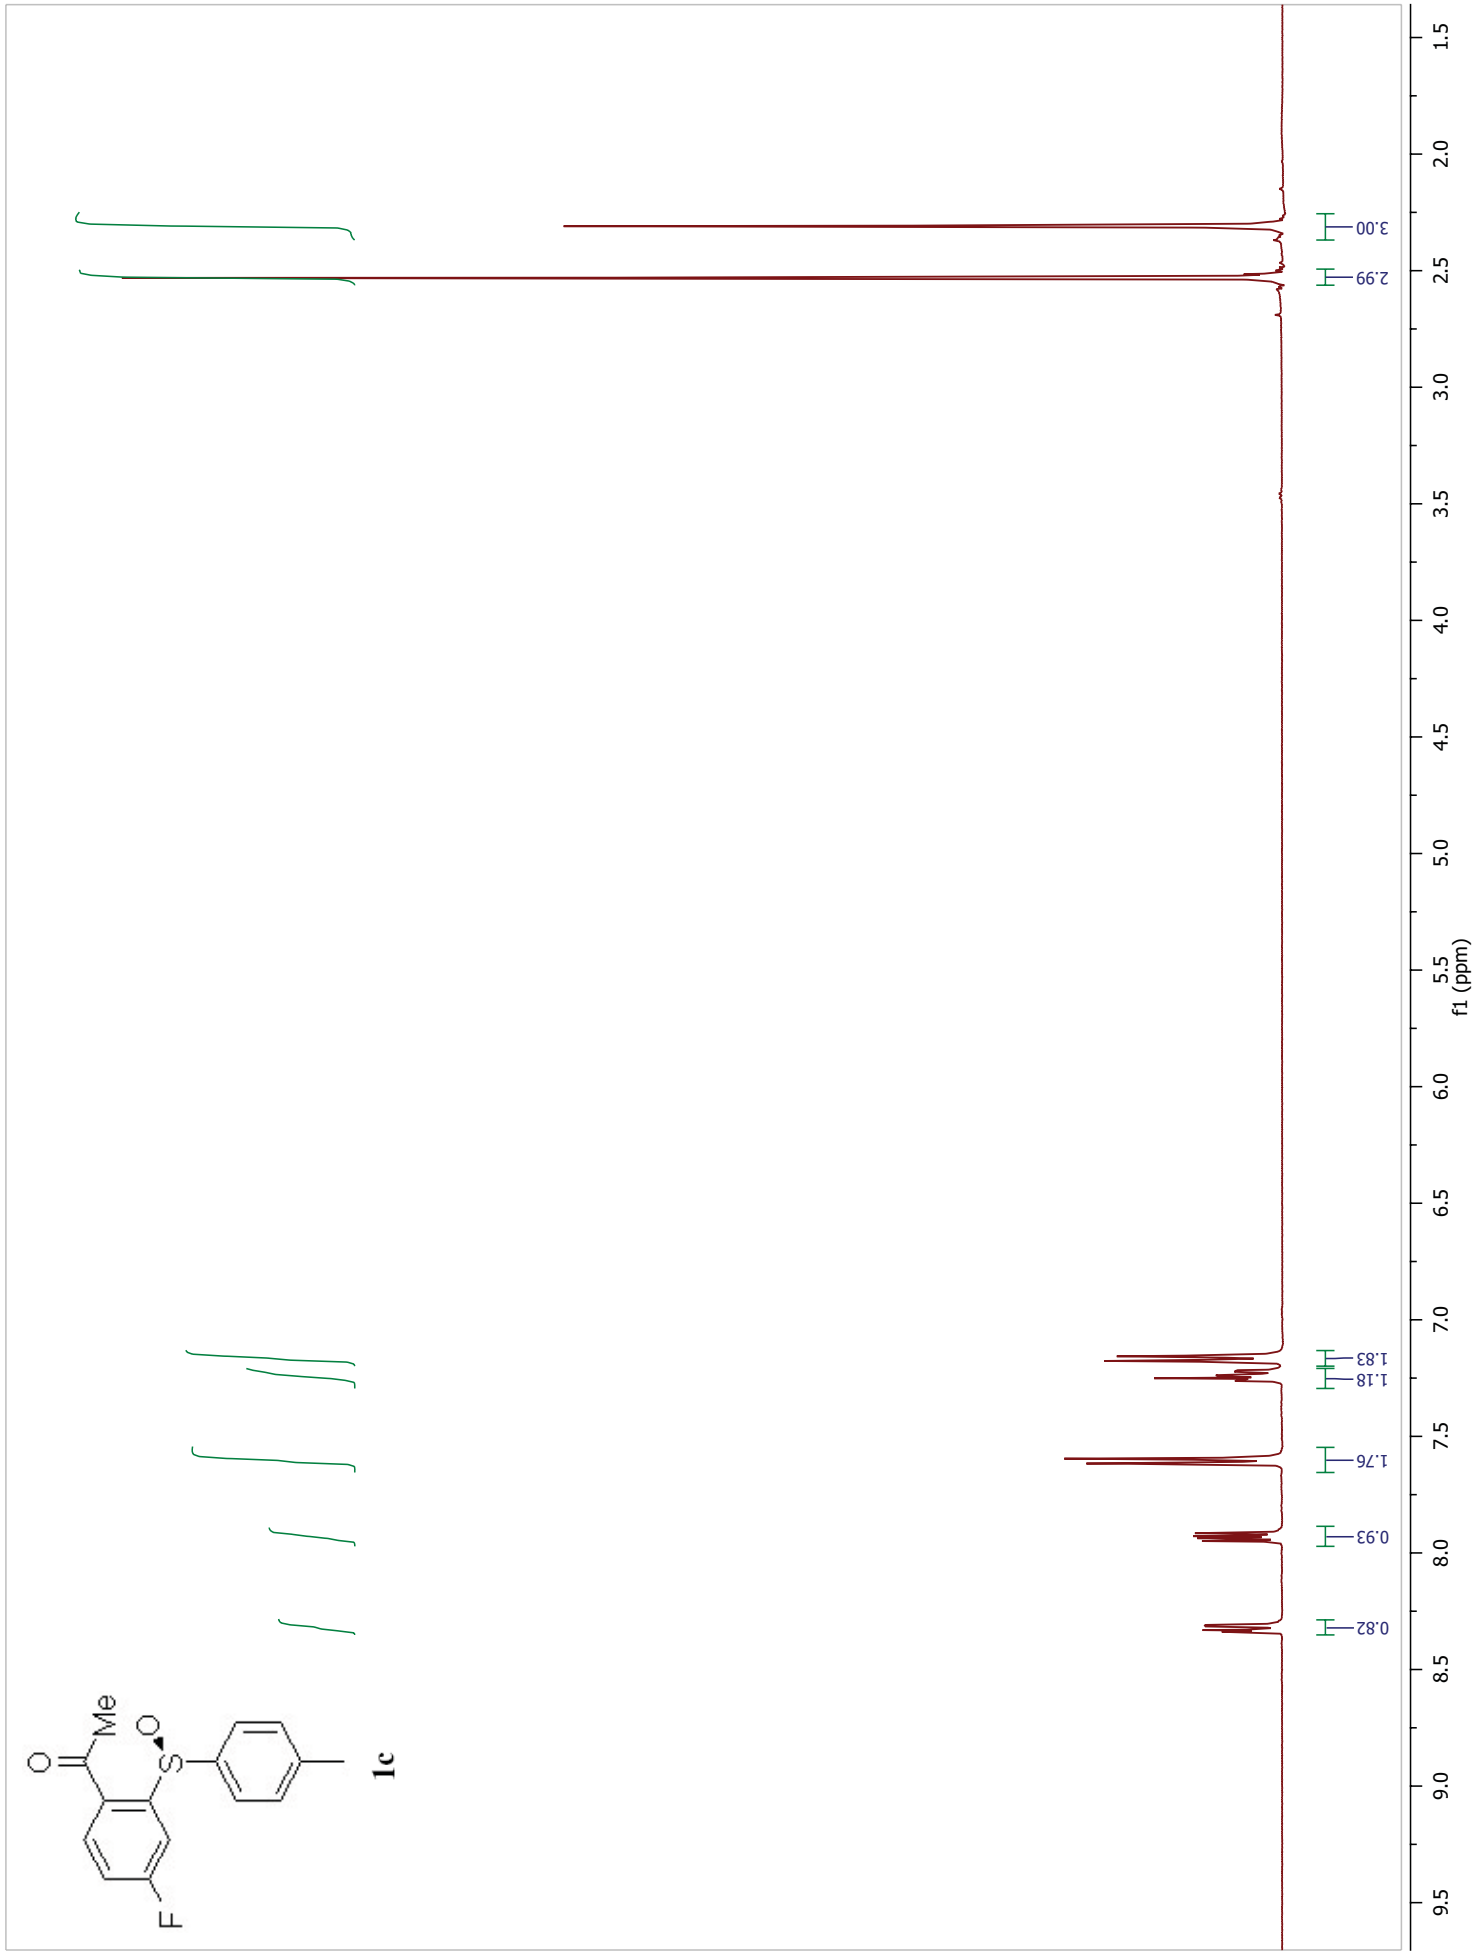

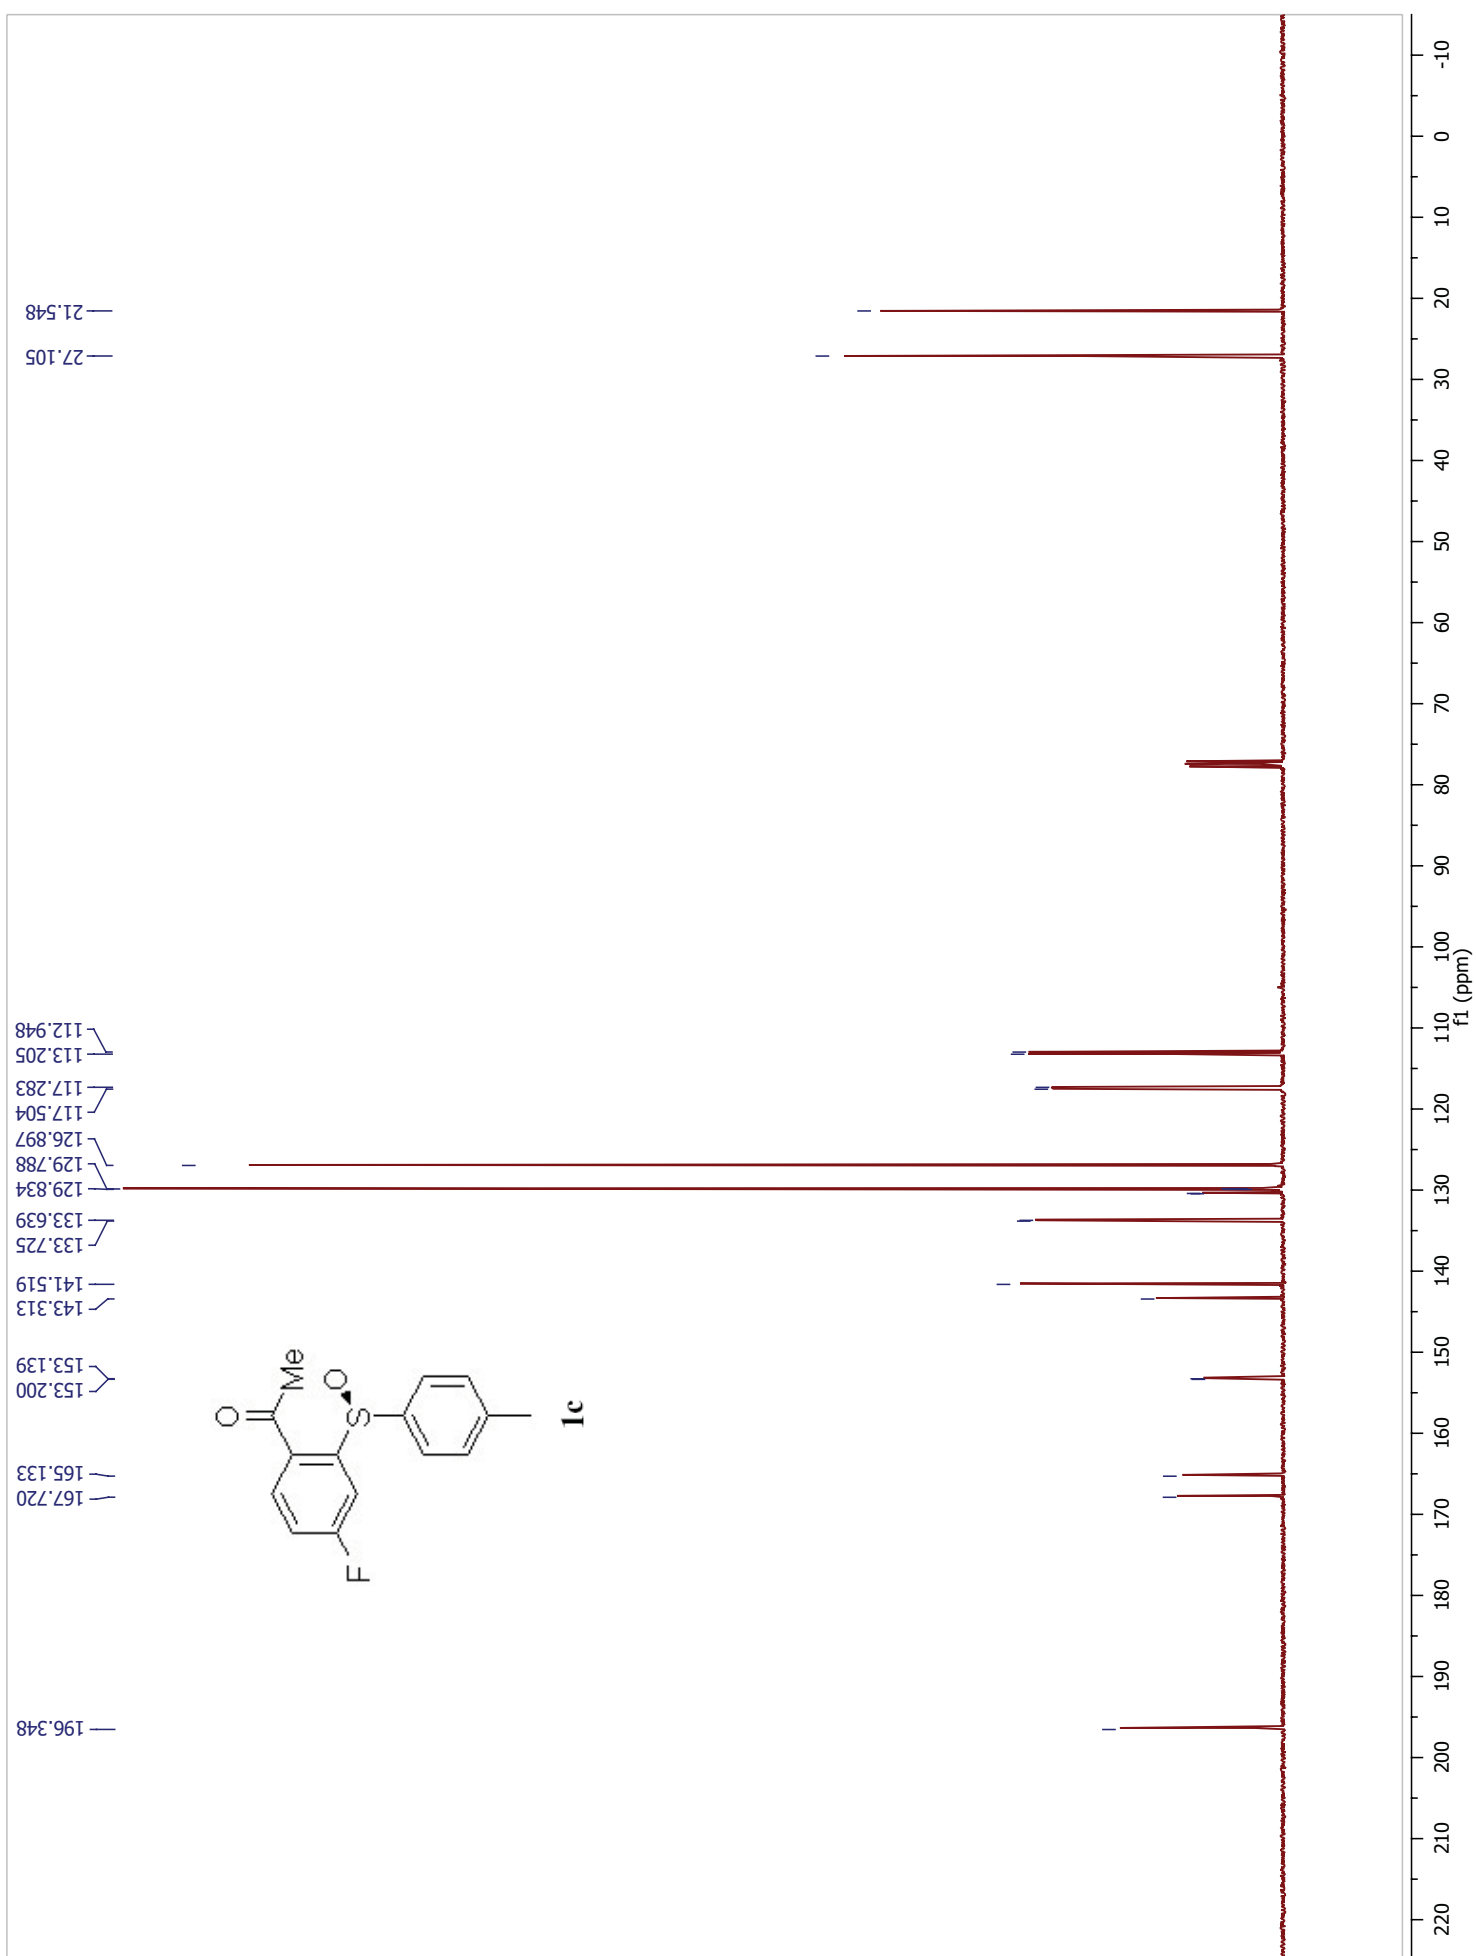

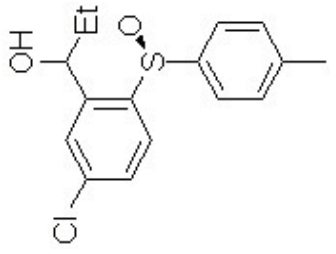

Alcohol D

Handwritten annotations in green ink: a bracket on the left side of the spectrum and a vertical line on the right side, both pointing to the aromatic region (7.0-7.8 ppm).

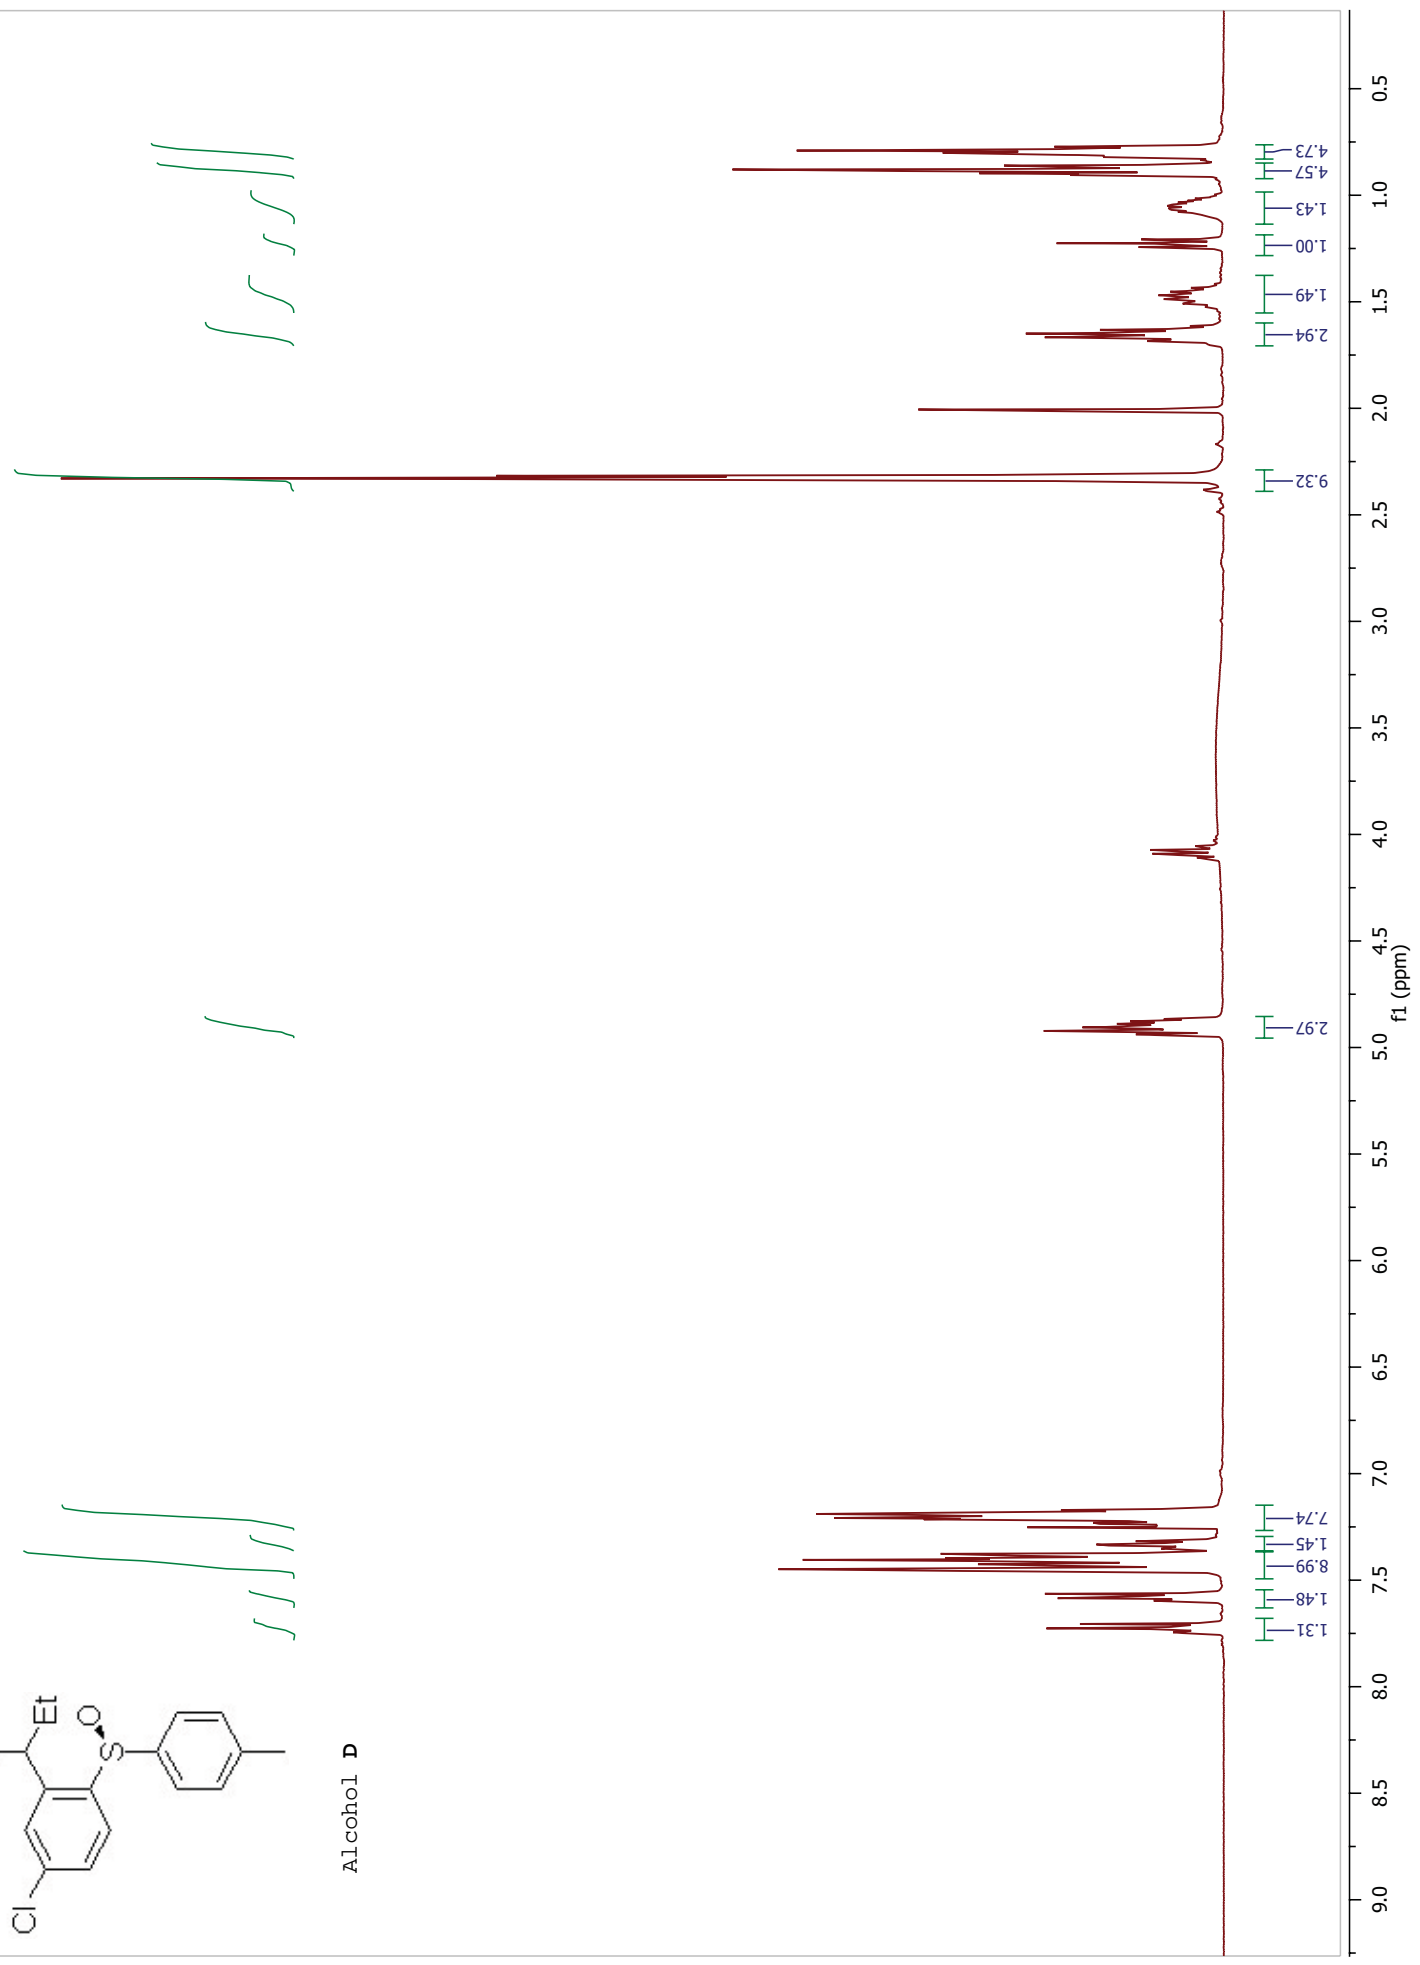



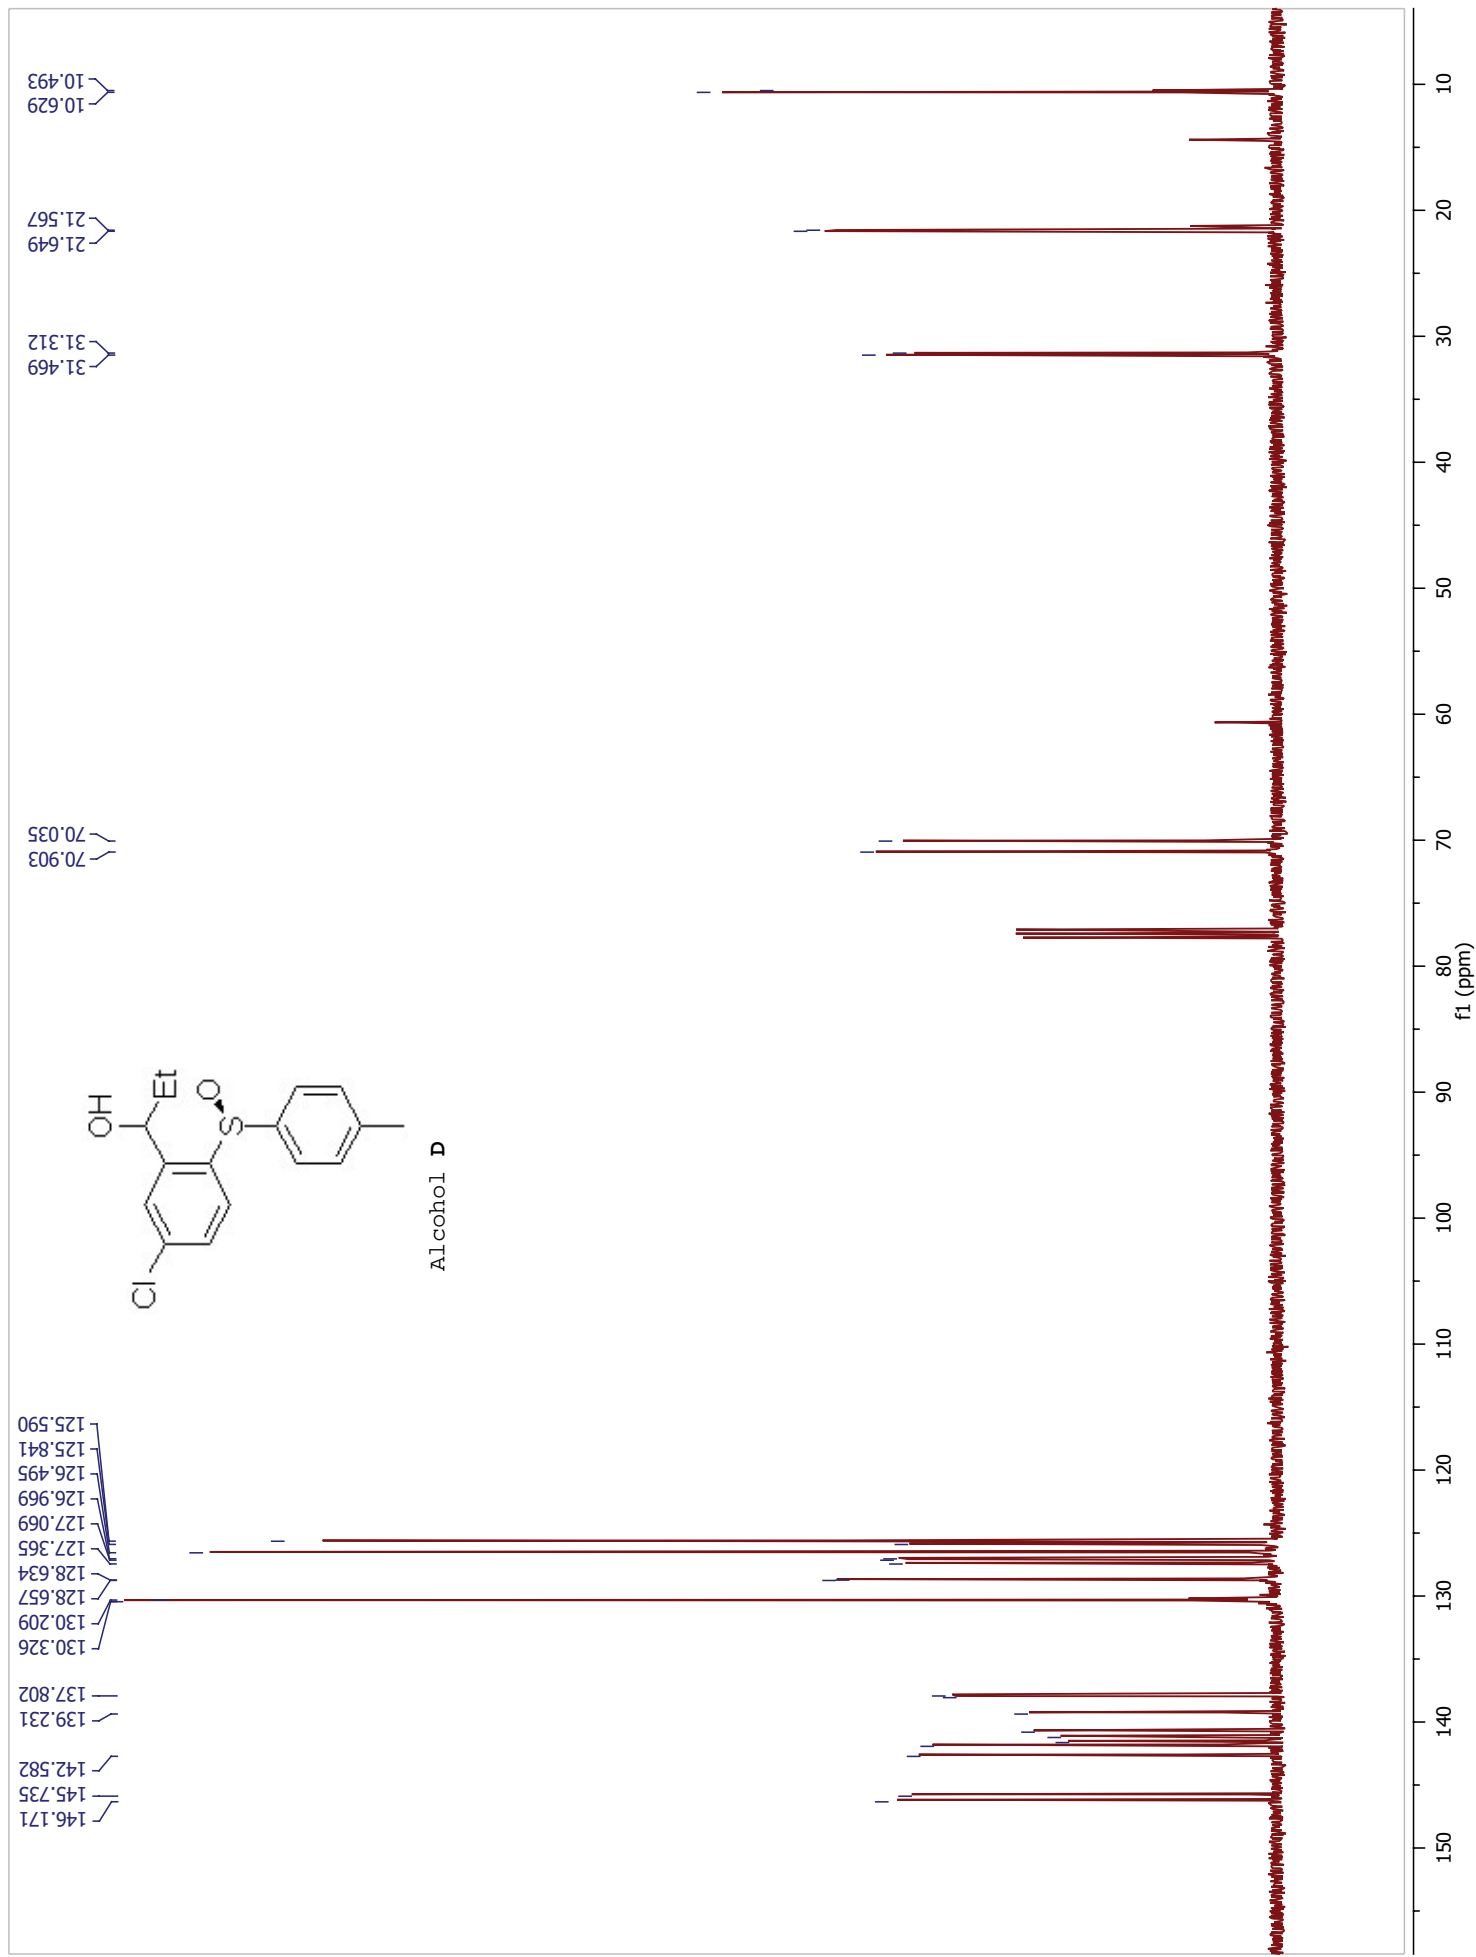

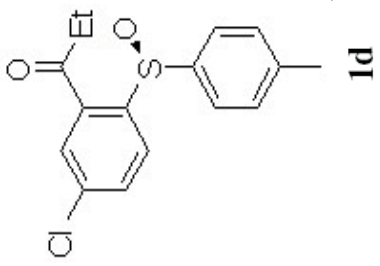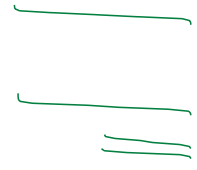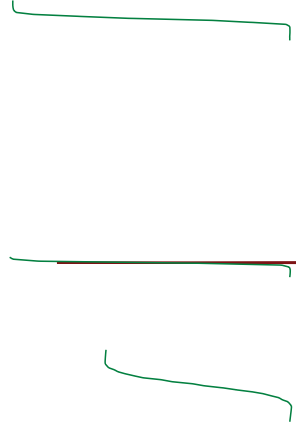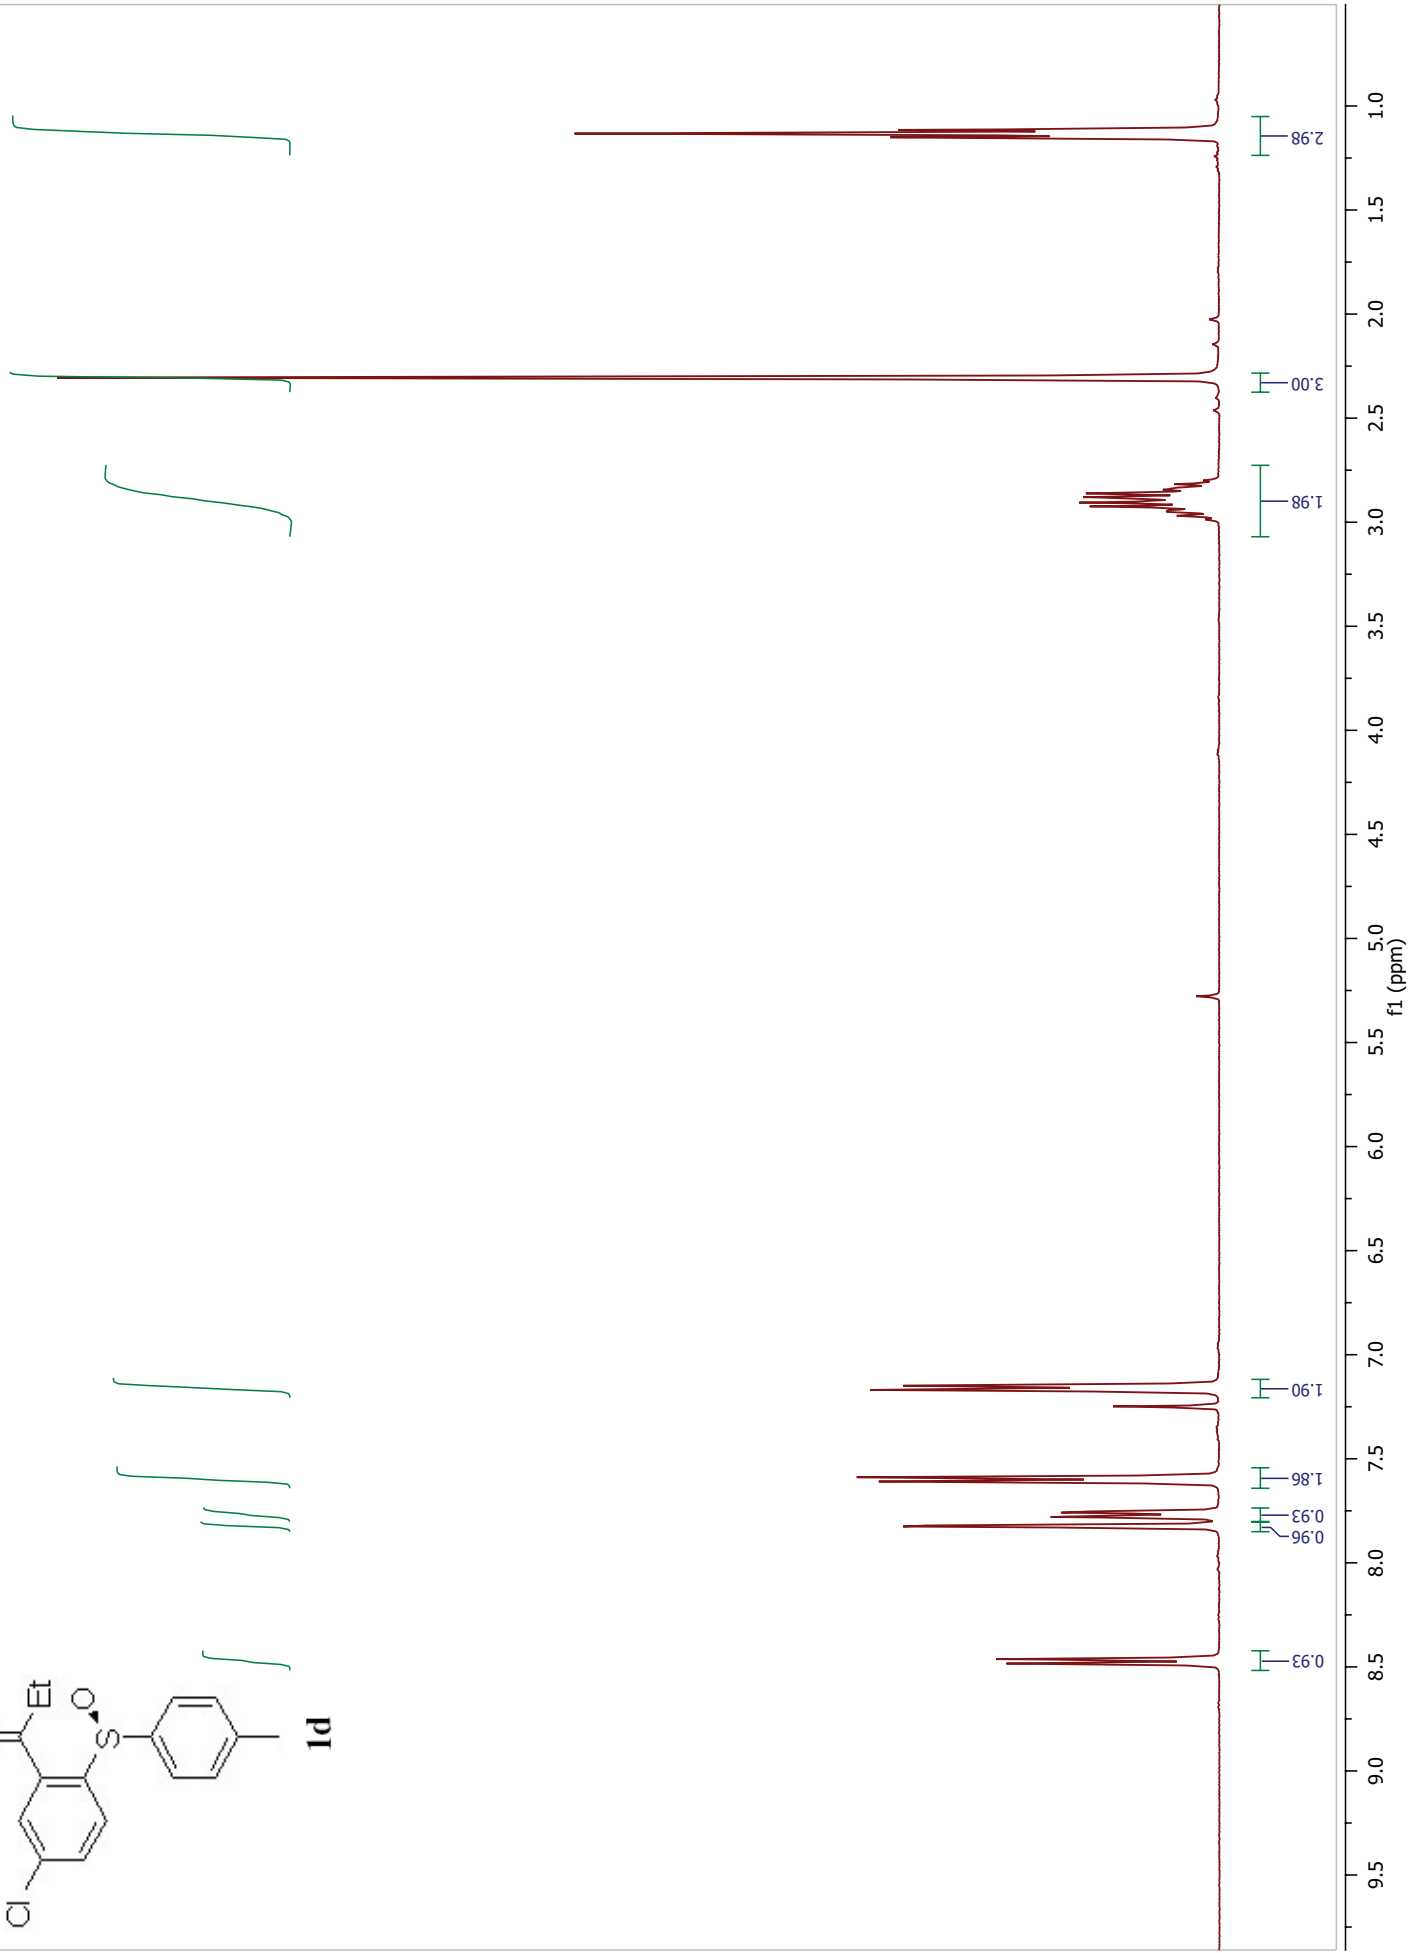

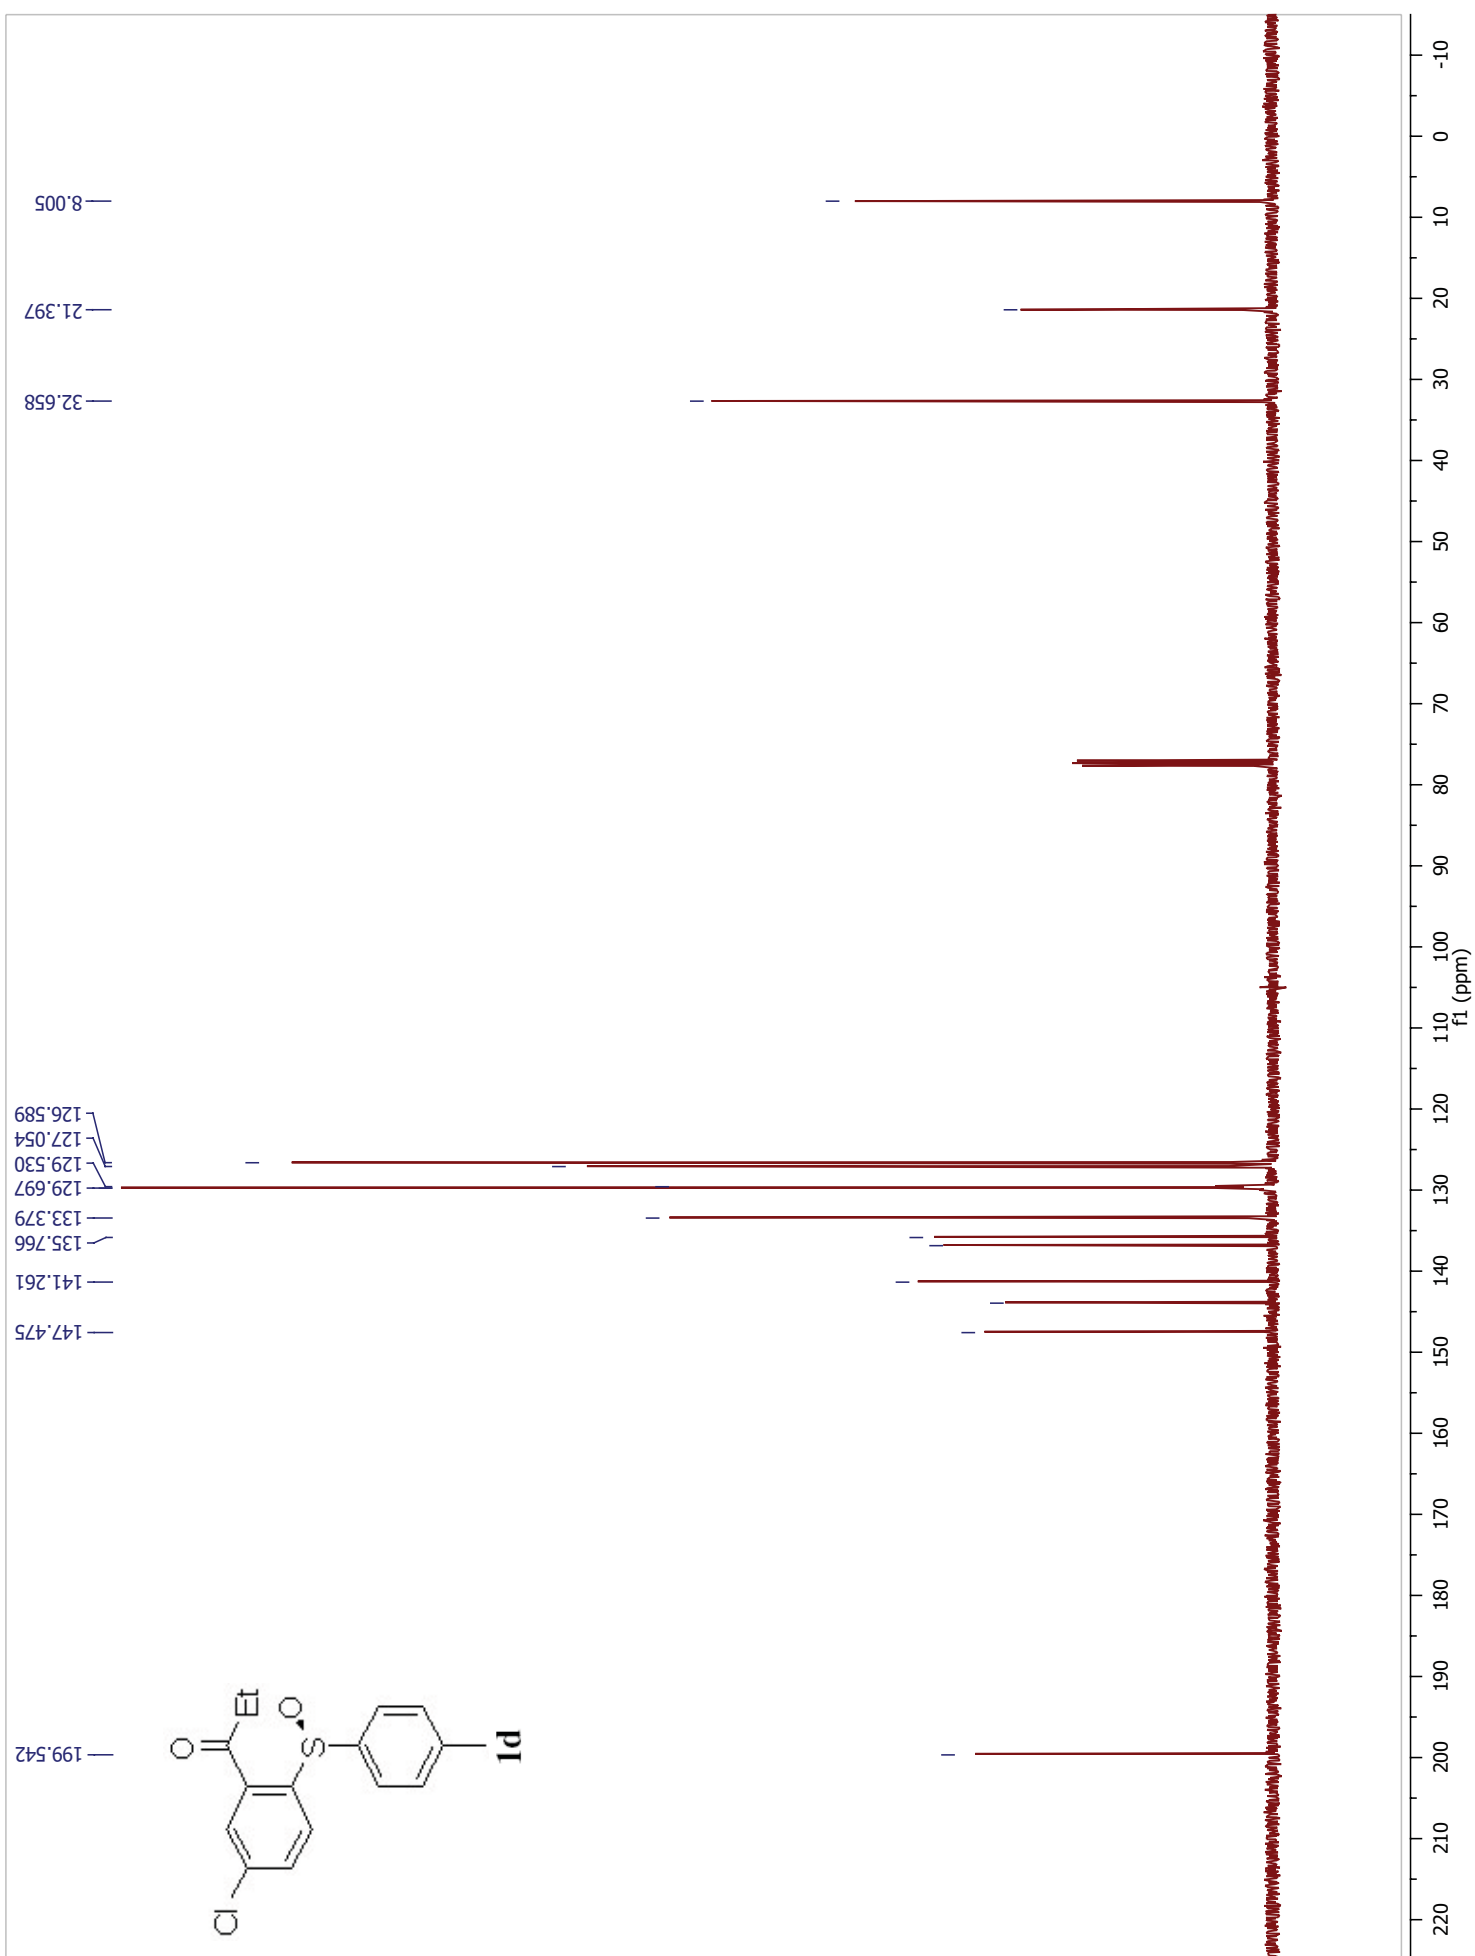

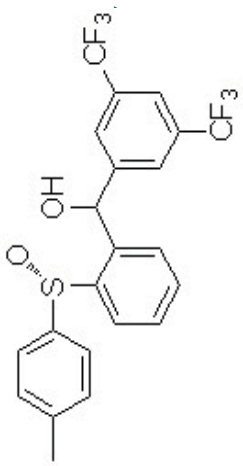

Alcohol E

Handwritten annotations in green ink: a series of vertical lines and wavy lines on the left side of the spectrum, and a large bracket on the right side of the spectrum.

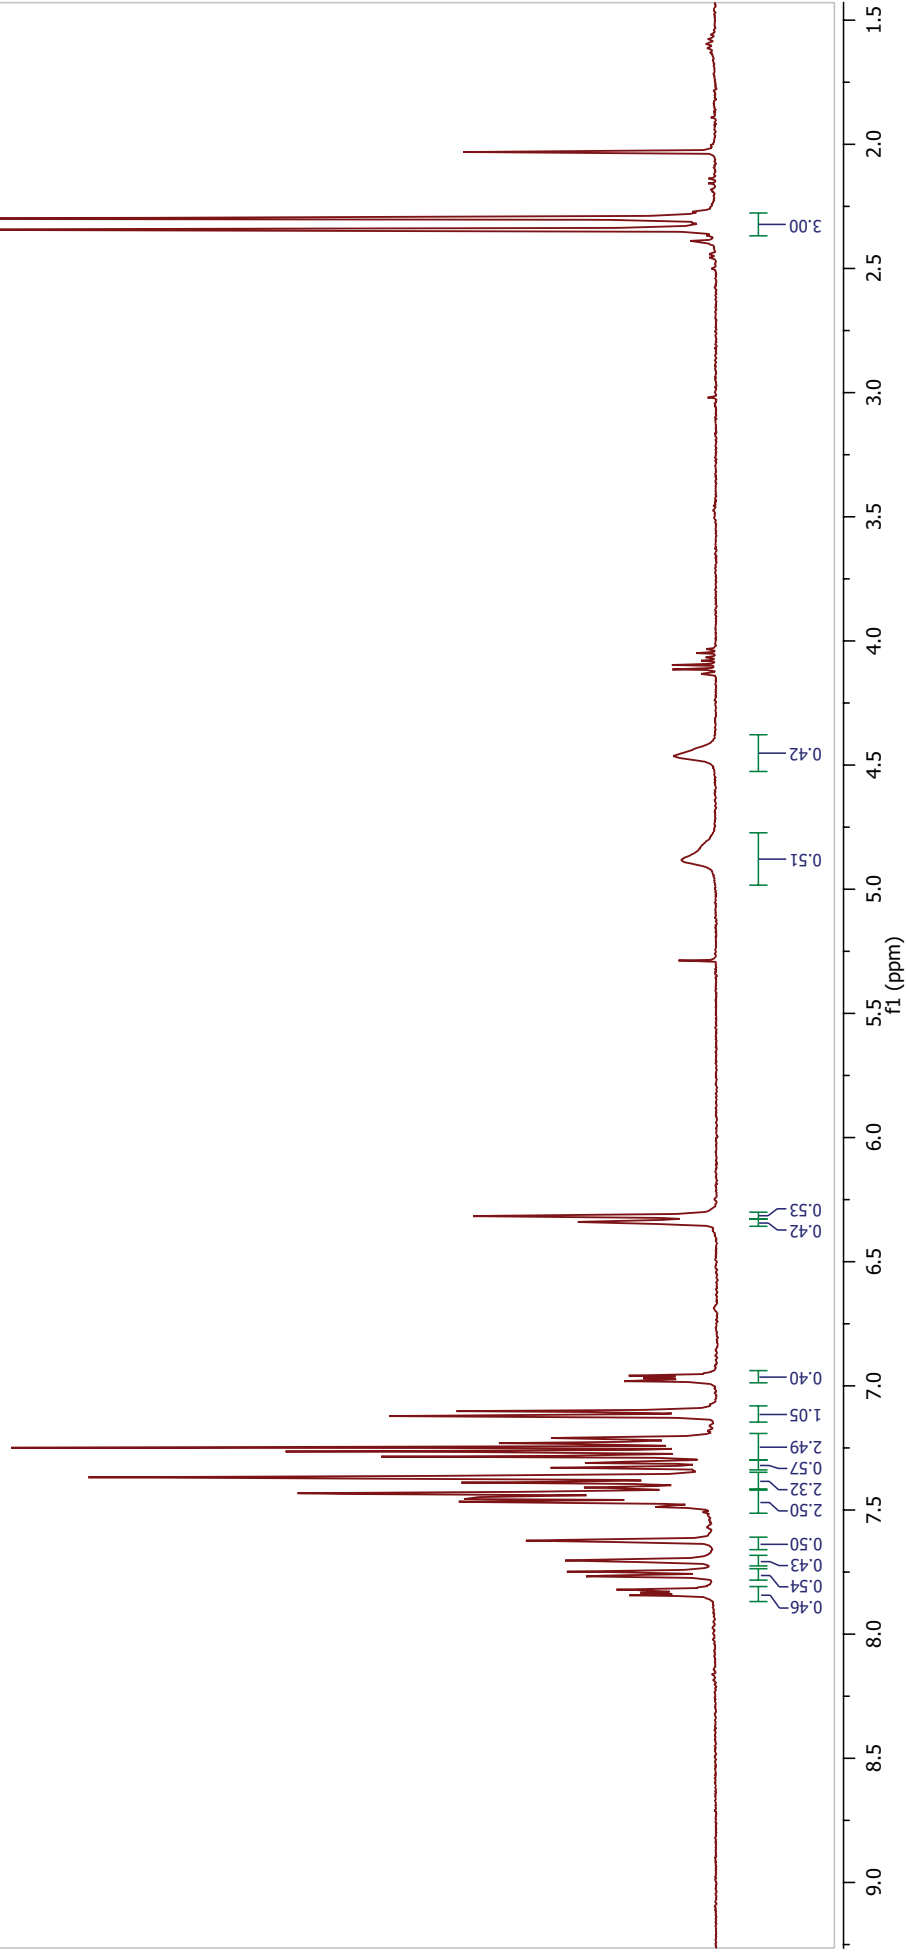

**1e**

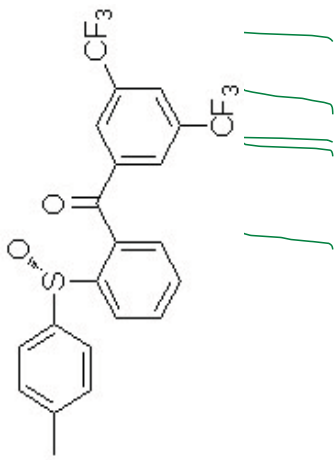

3.00

2.0 2.5 3.0 3.5 4.0 4.5 5.0 5.5 6.0 6.5 7.0 7.5 8.0 8.5 9.0

f1 (ppm)

1.98

0.99

3.04

1.02

1.97

0.98

0.99

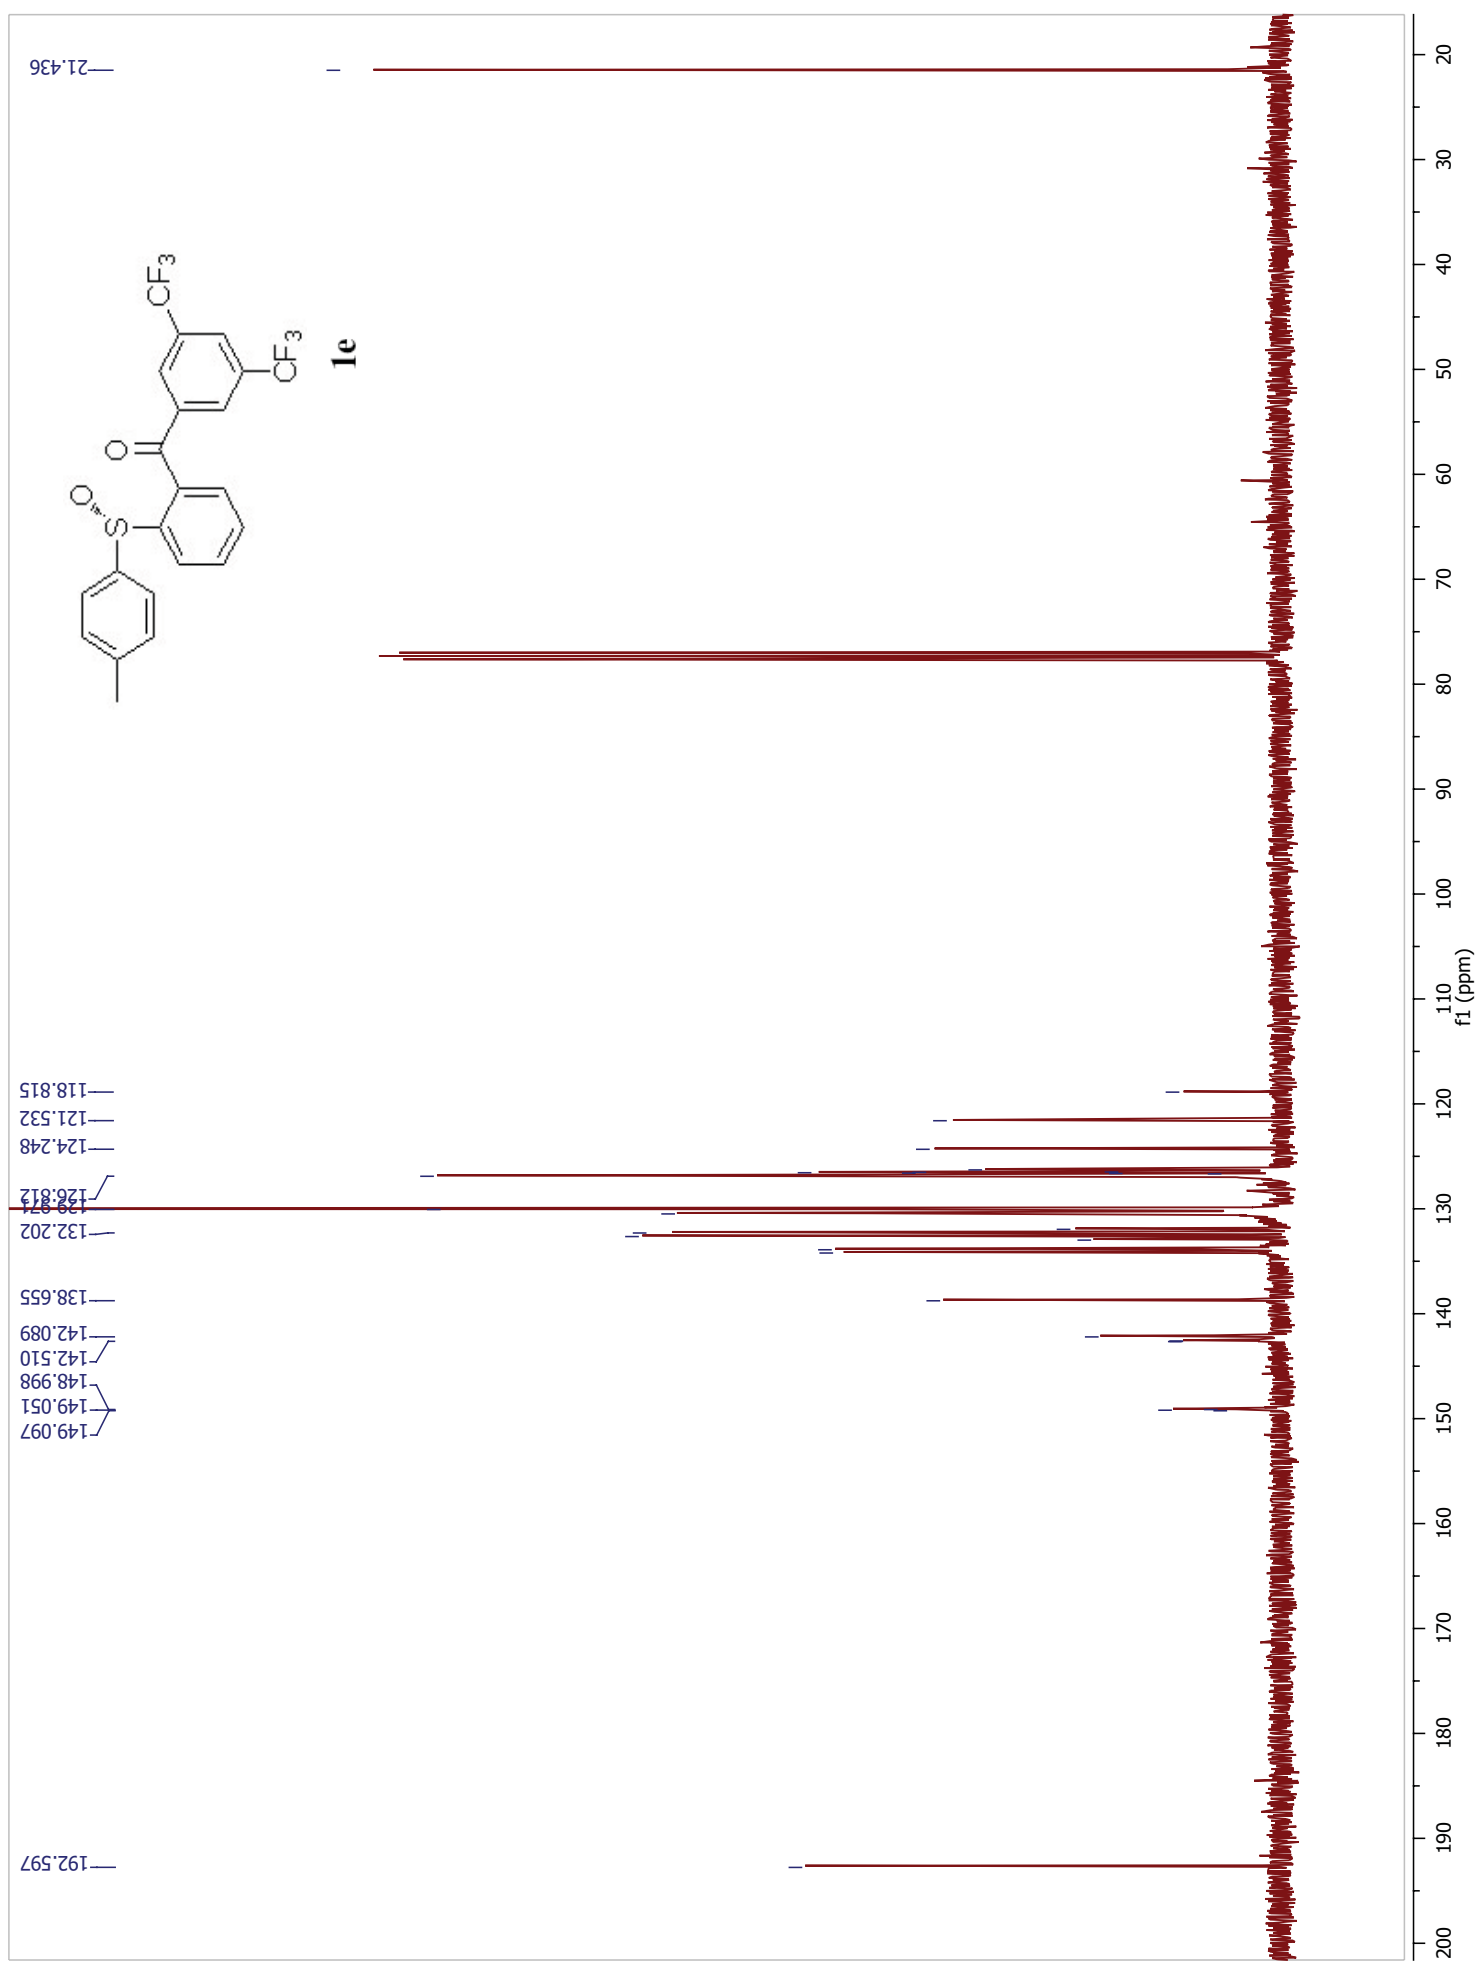

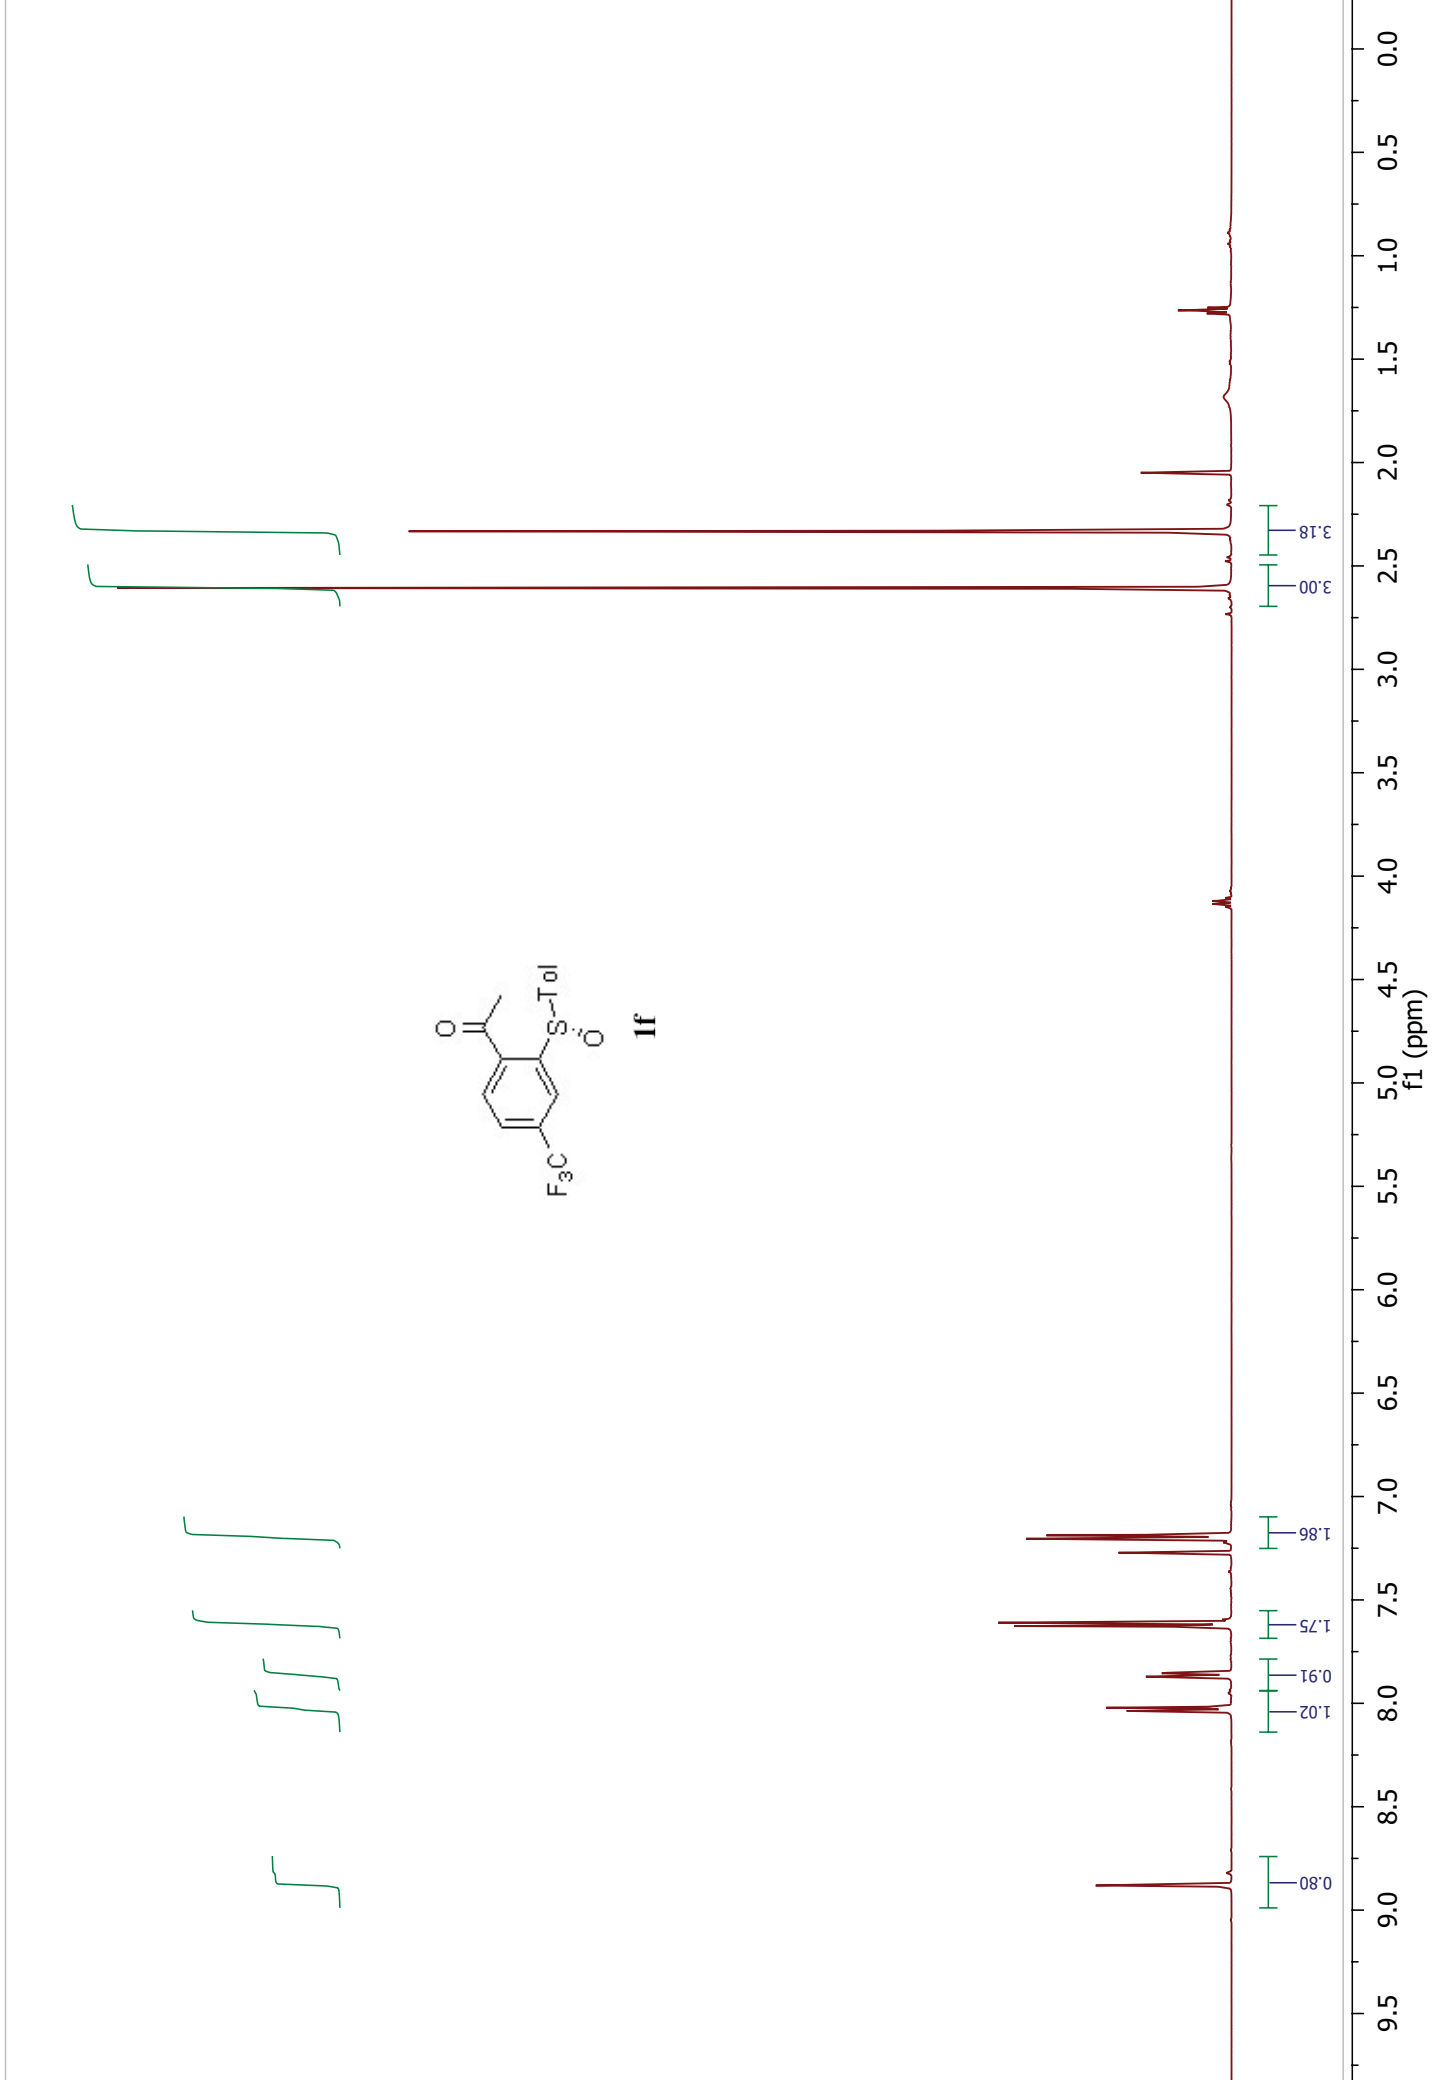

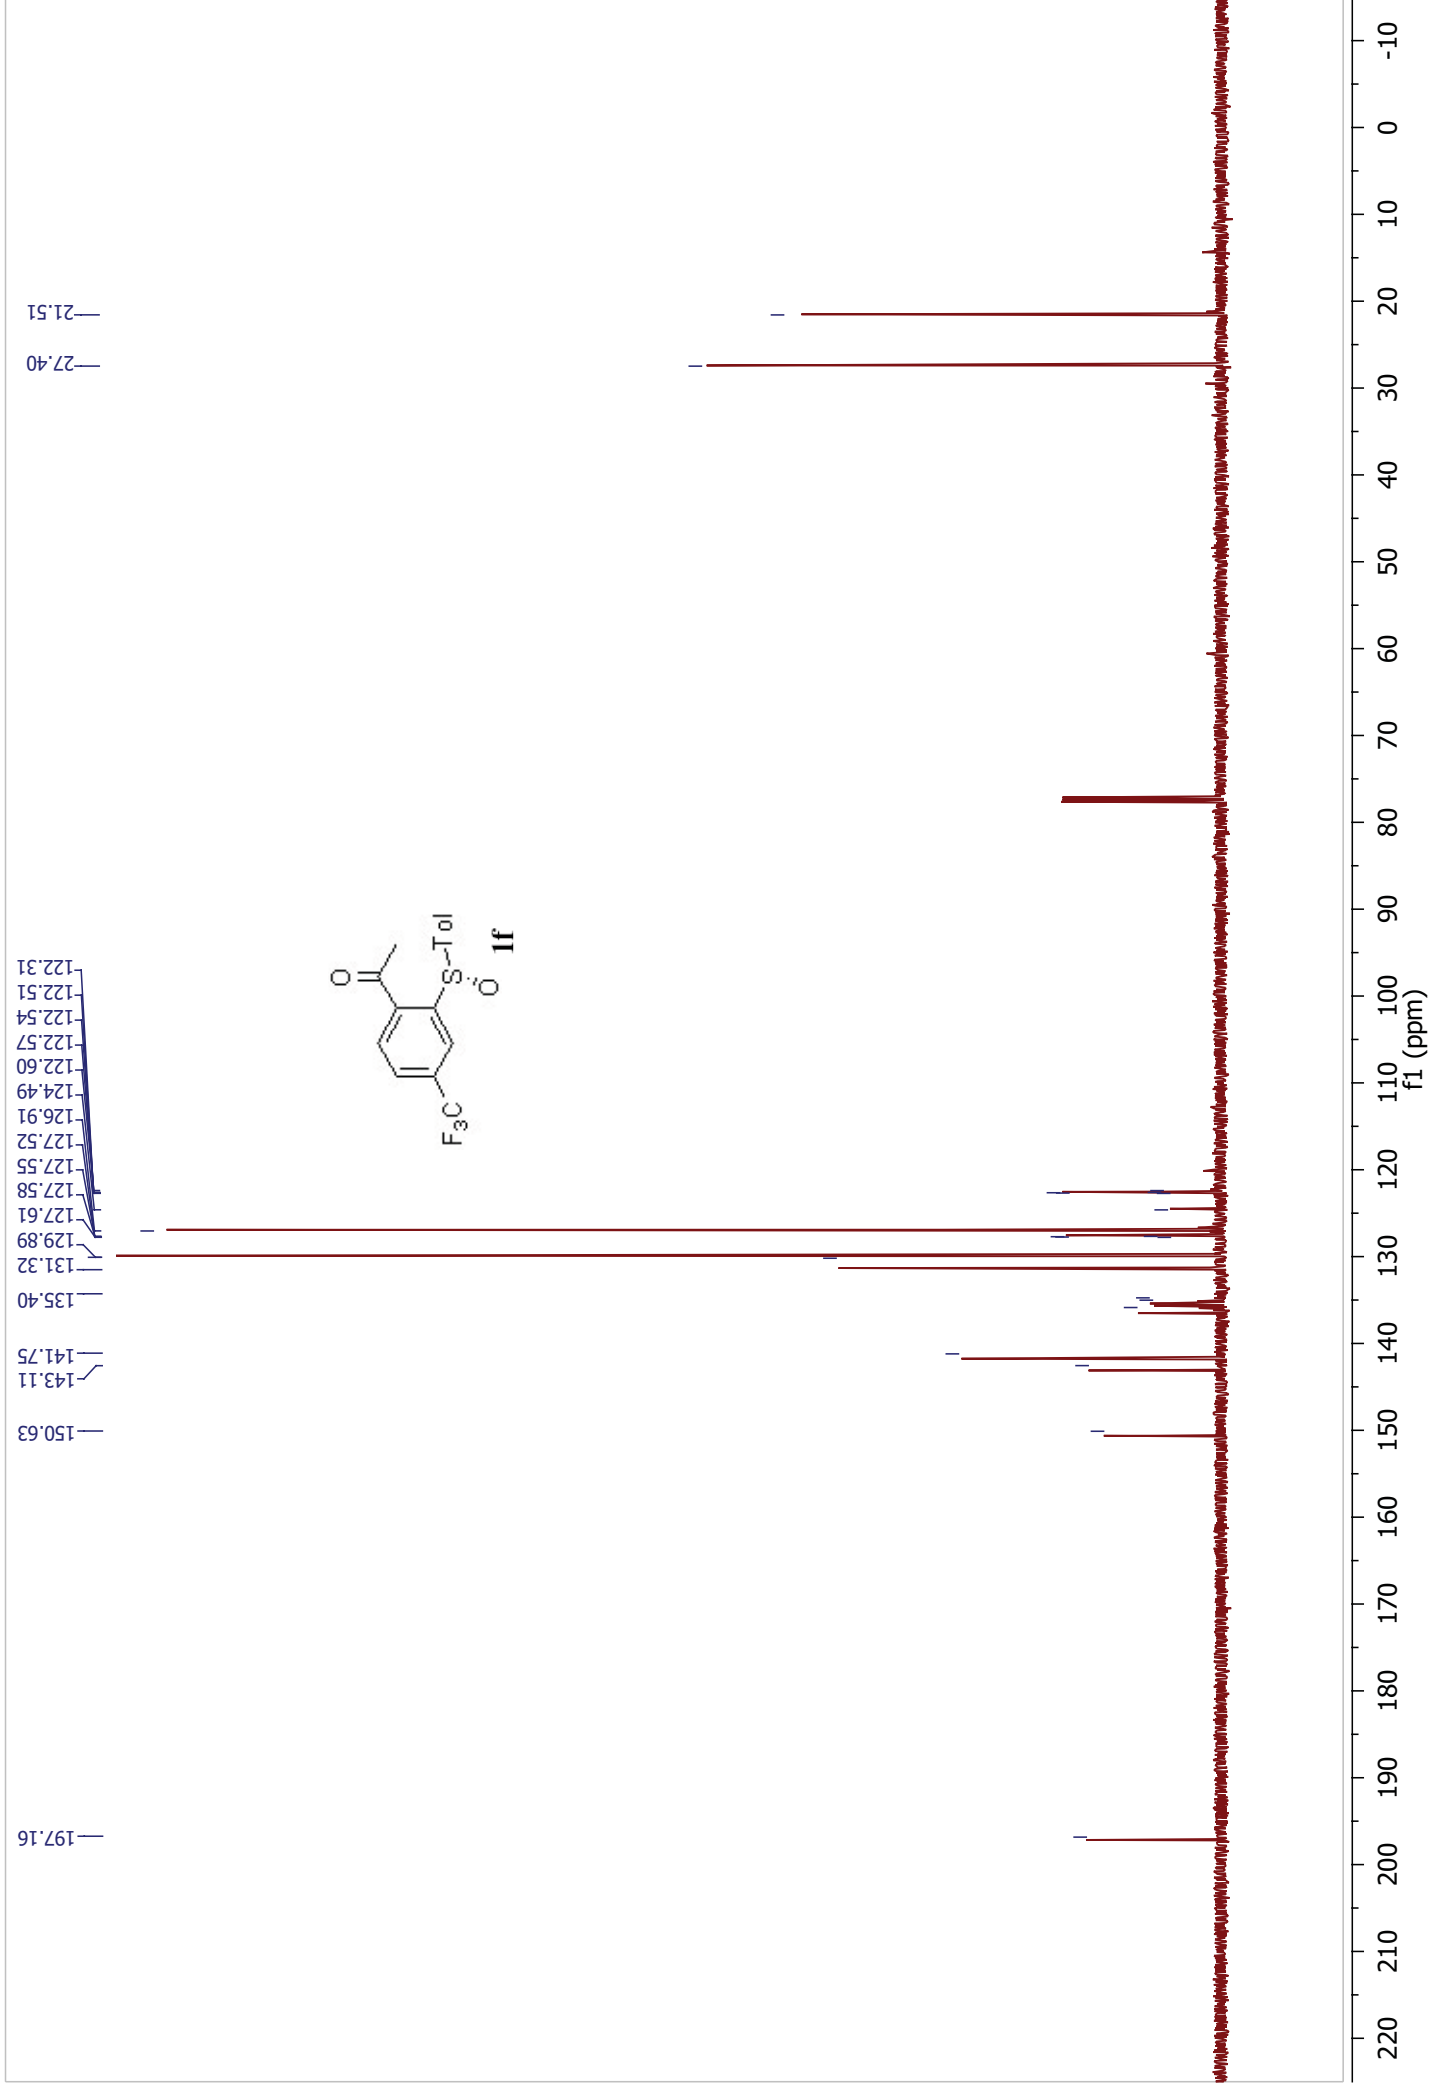



Table 2, Entry 1

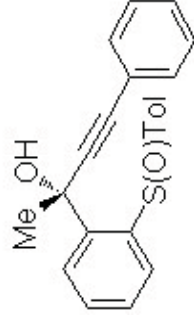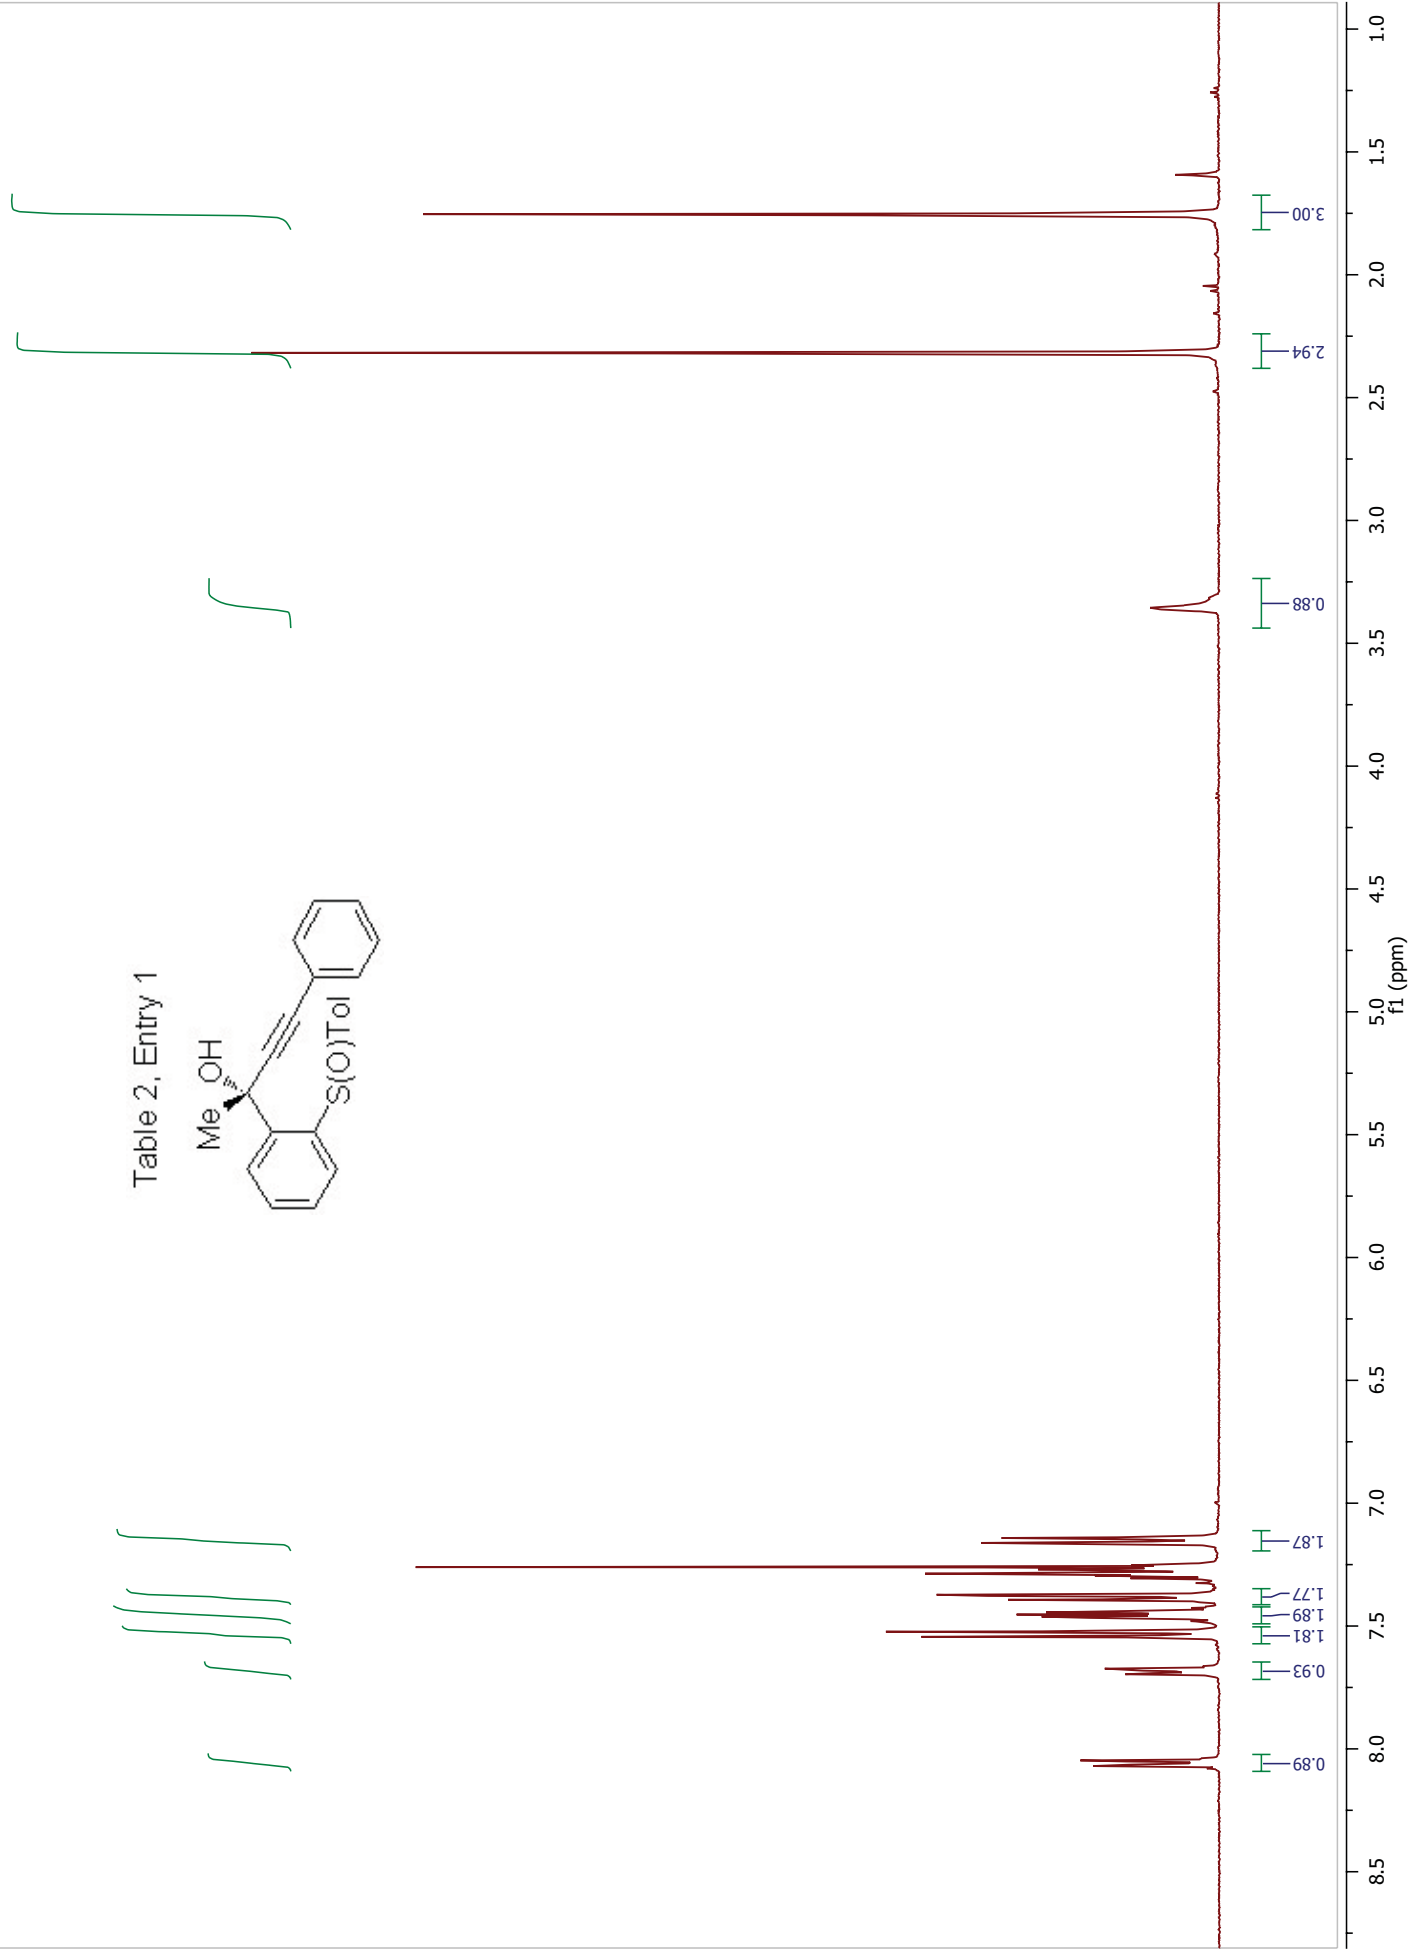

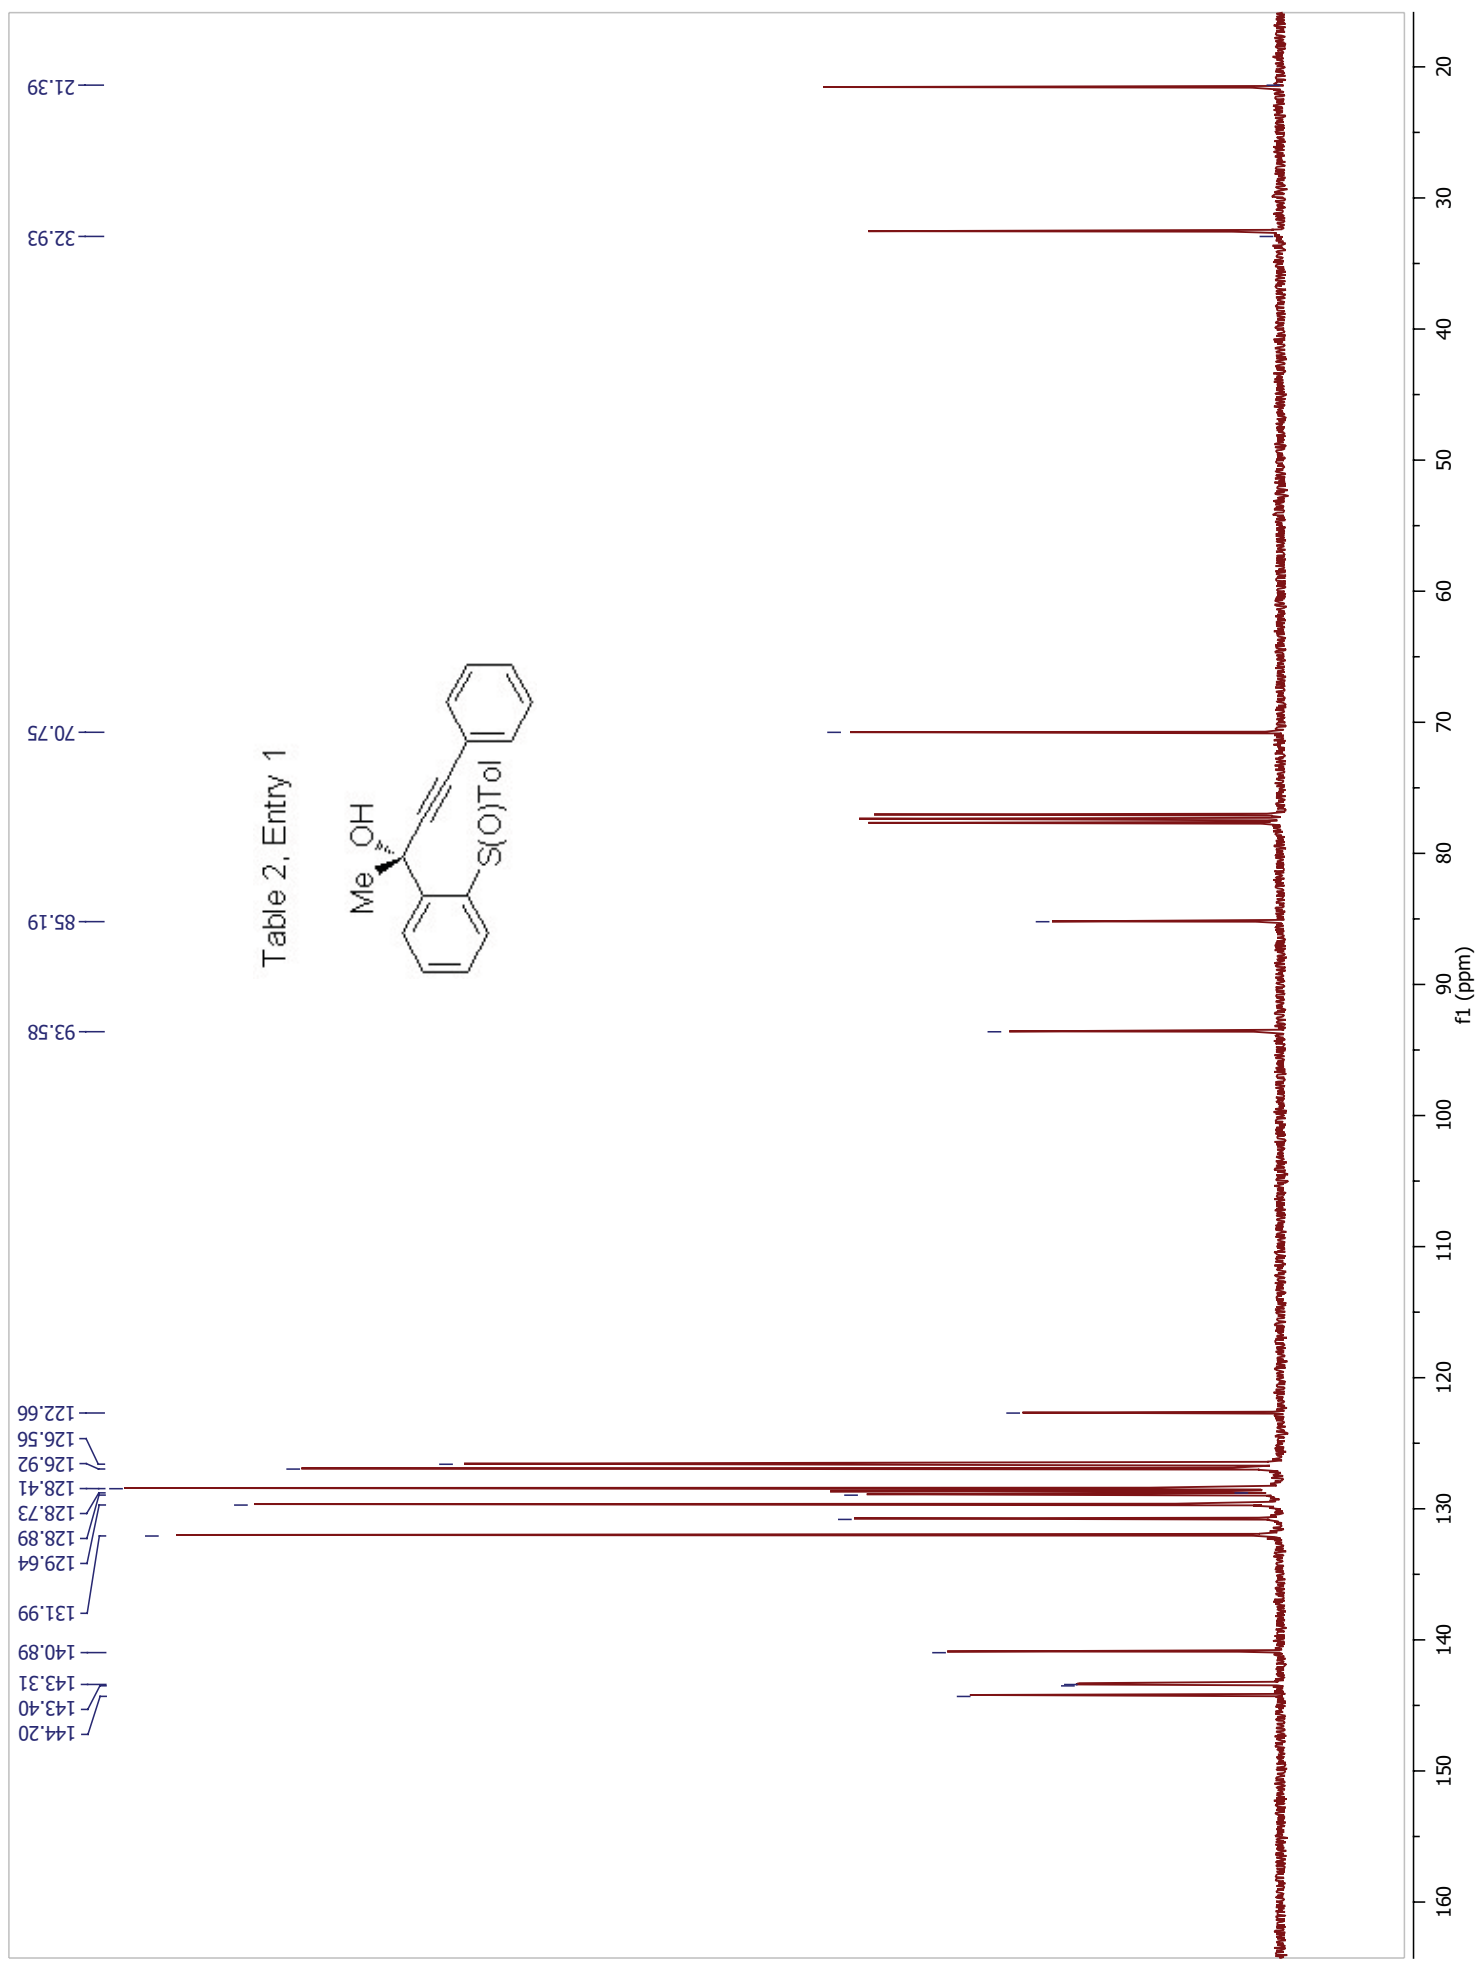

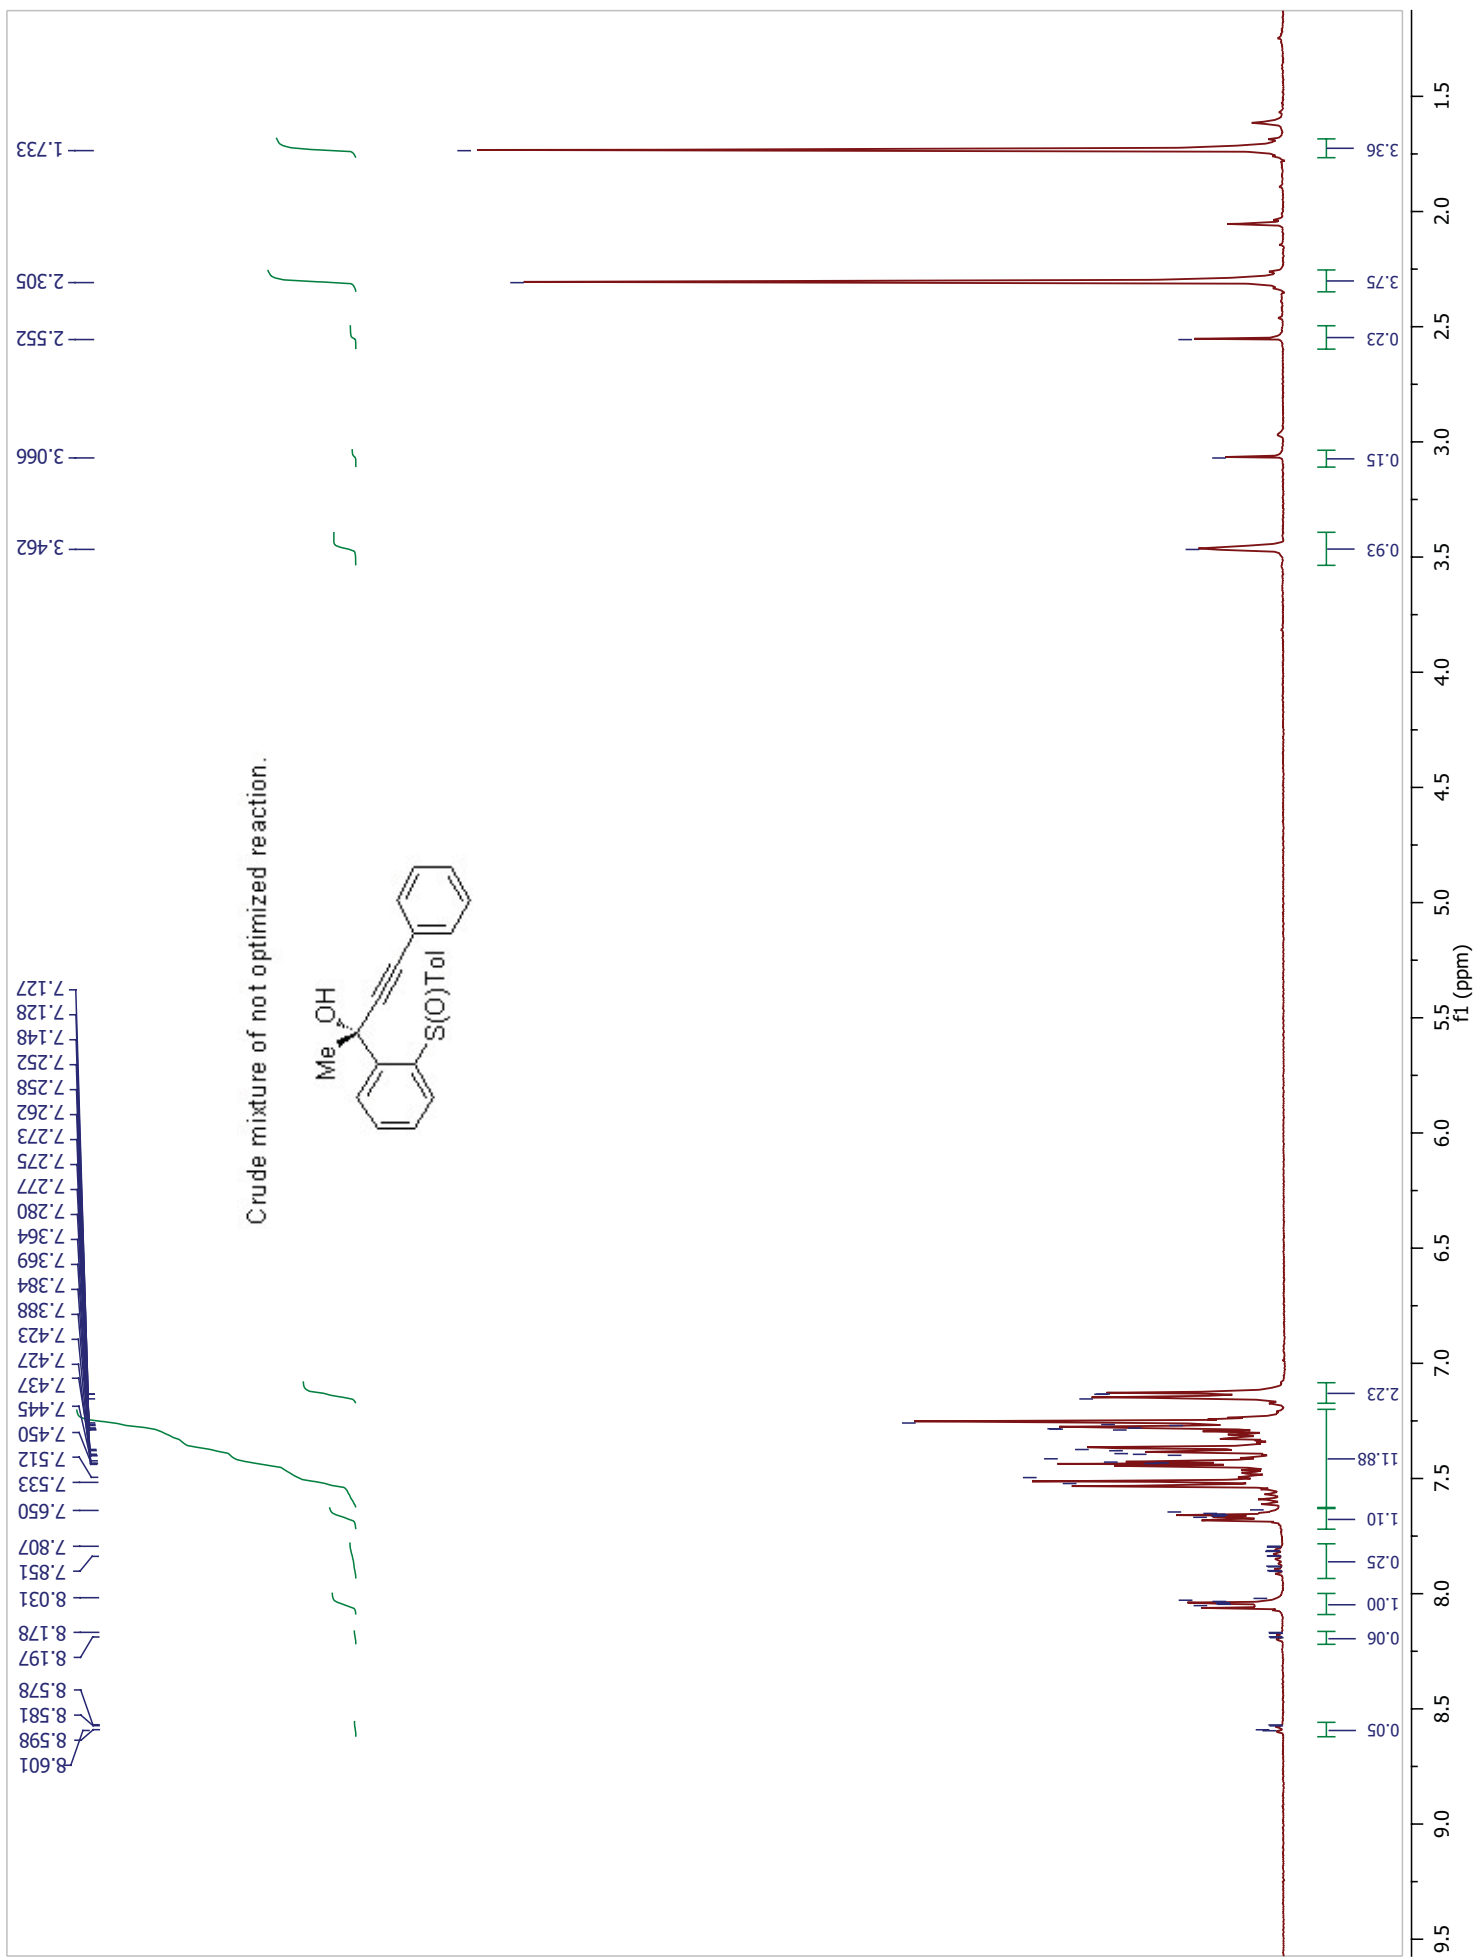

8.601  
8.598  
8.581  
8.578

Crude mixture of not optimized reaction.

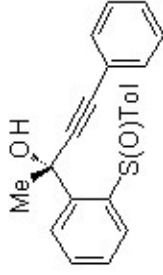

95 % of Product; d.r. = 16:1  
5 % of Starting Material

8.201  
8.197  
8.181  
8.178

8.062  
8.056  
8.053  
8.049  
8.044  
8.039  
8.031

Major diastereoisomer

Starting material

Minor diastereoisomer

0.05

0.06

1.00

8.75

8.70

8.65

8.60

8.55

8.50

8.45

8.40

8.35

8.30

8.25

8.20

8.15

8.10

8.05

8.00

f1 (ppm)

Crude mixture of optimized reaction.

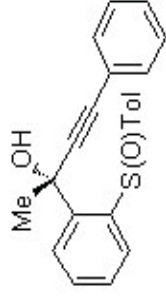

Major diastereoisomer

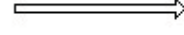

Minor diastereoisomer

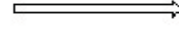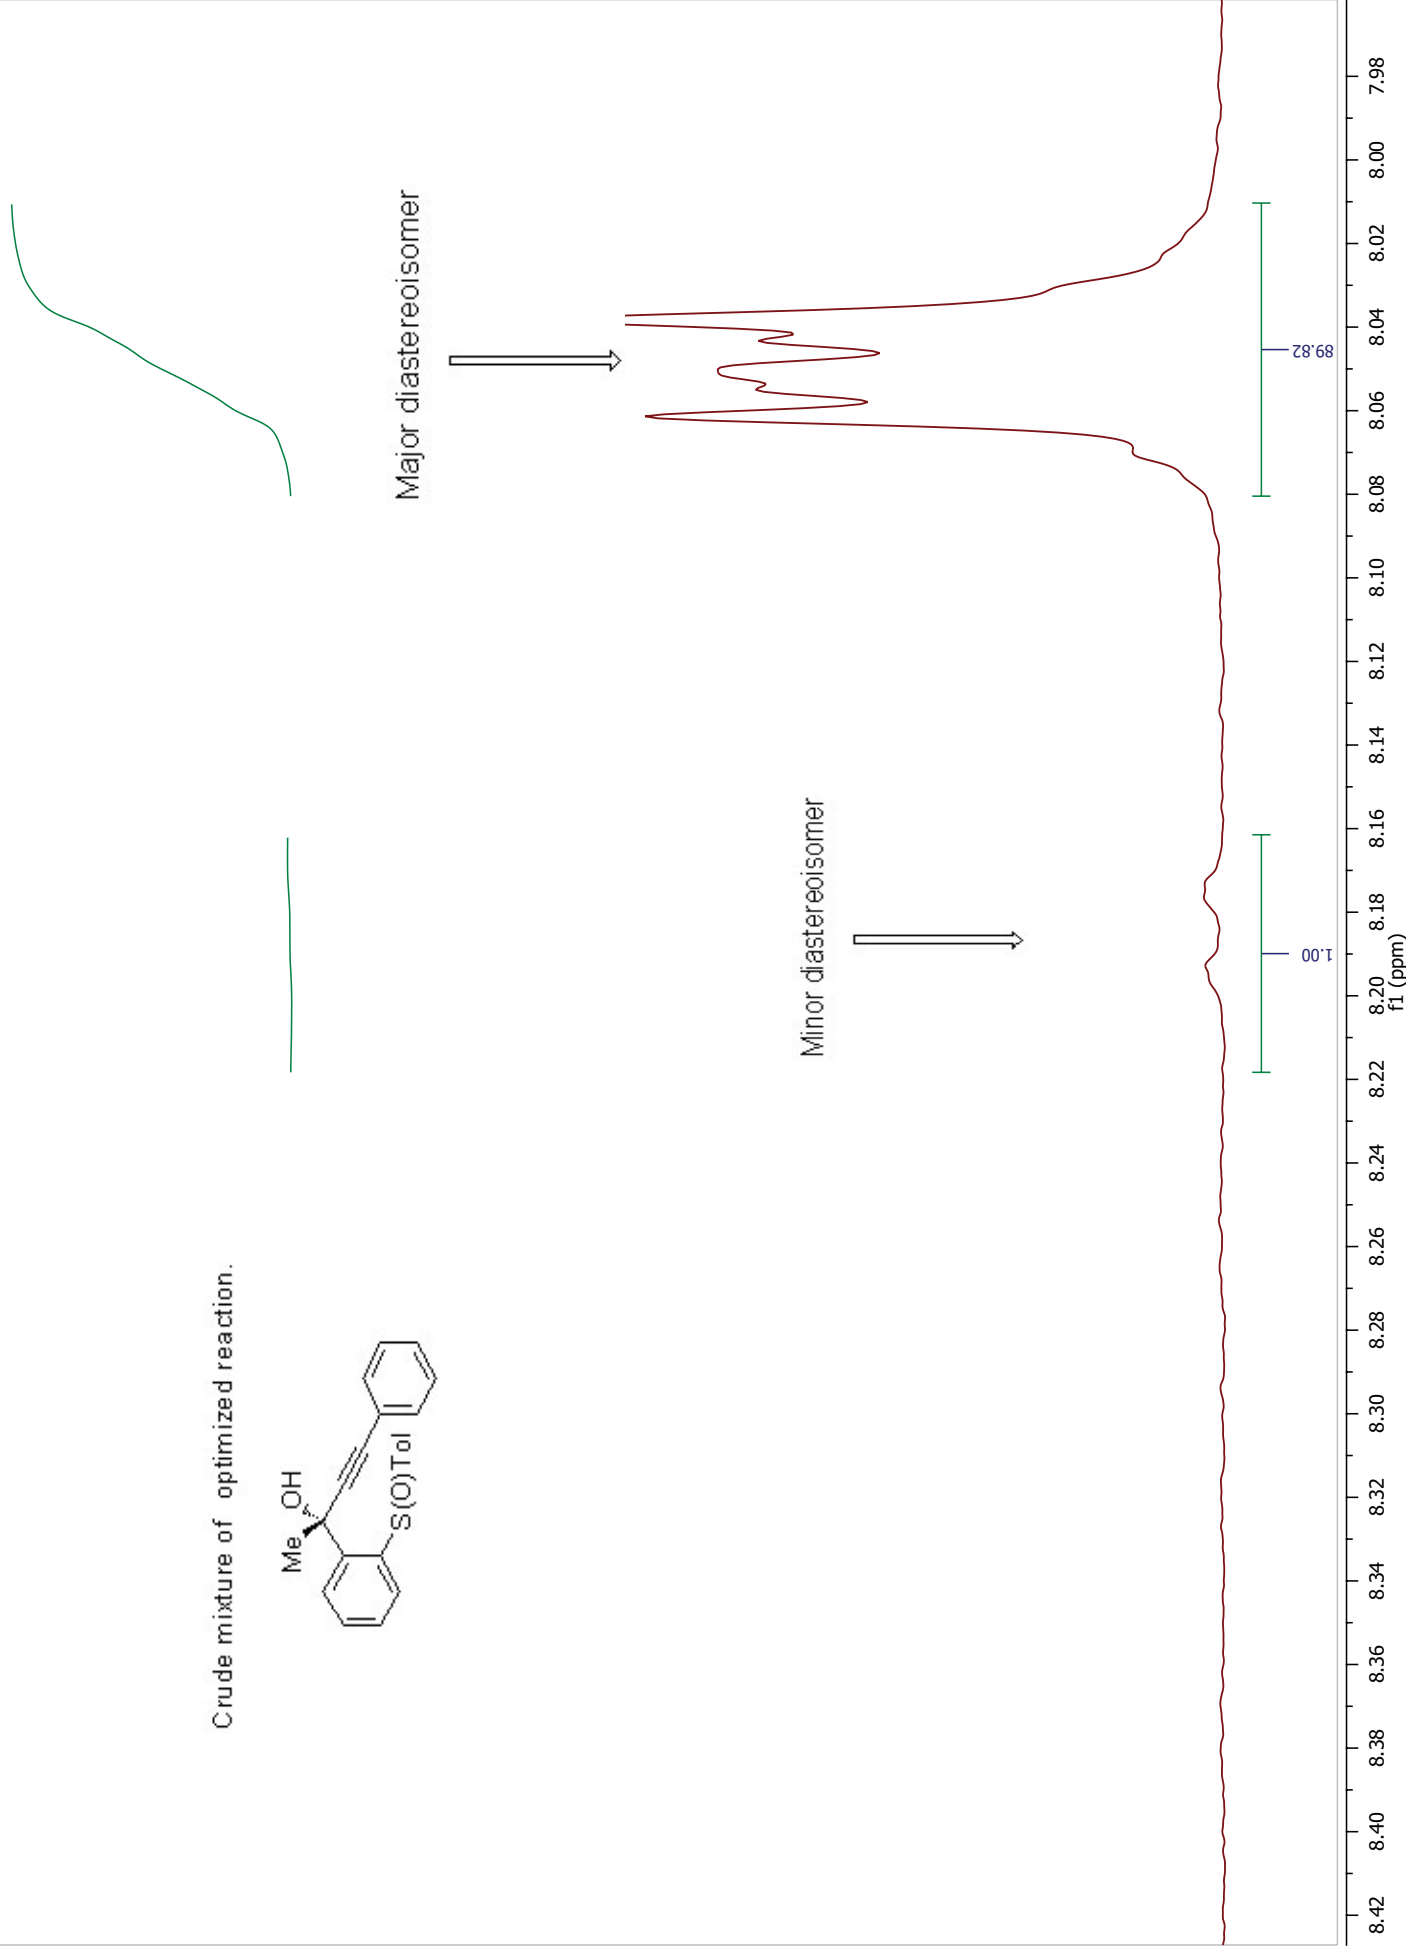

Table 2, Entry 1

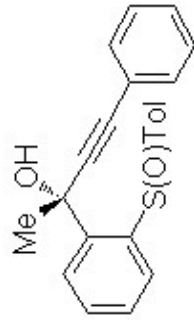

Major diastereoisomer

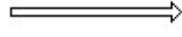

Major diastereoisomer

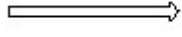

Purified major diastereomer

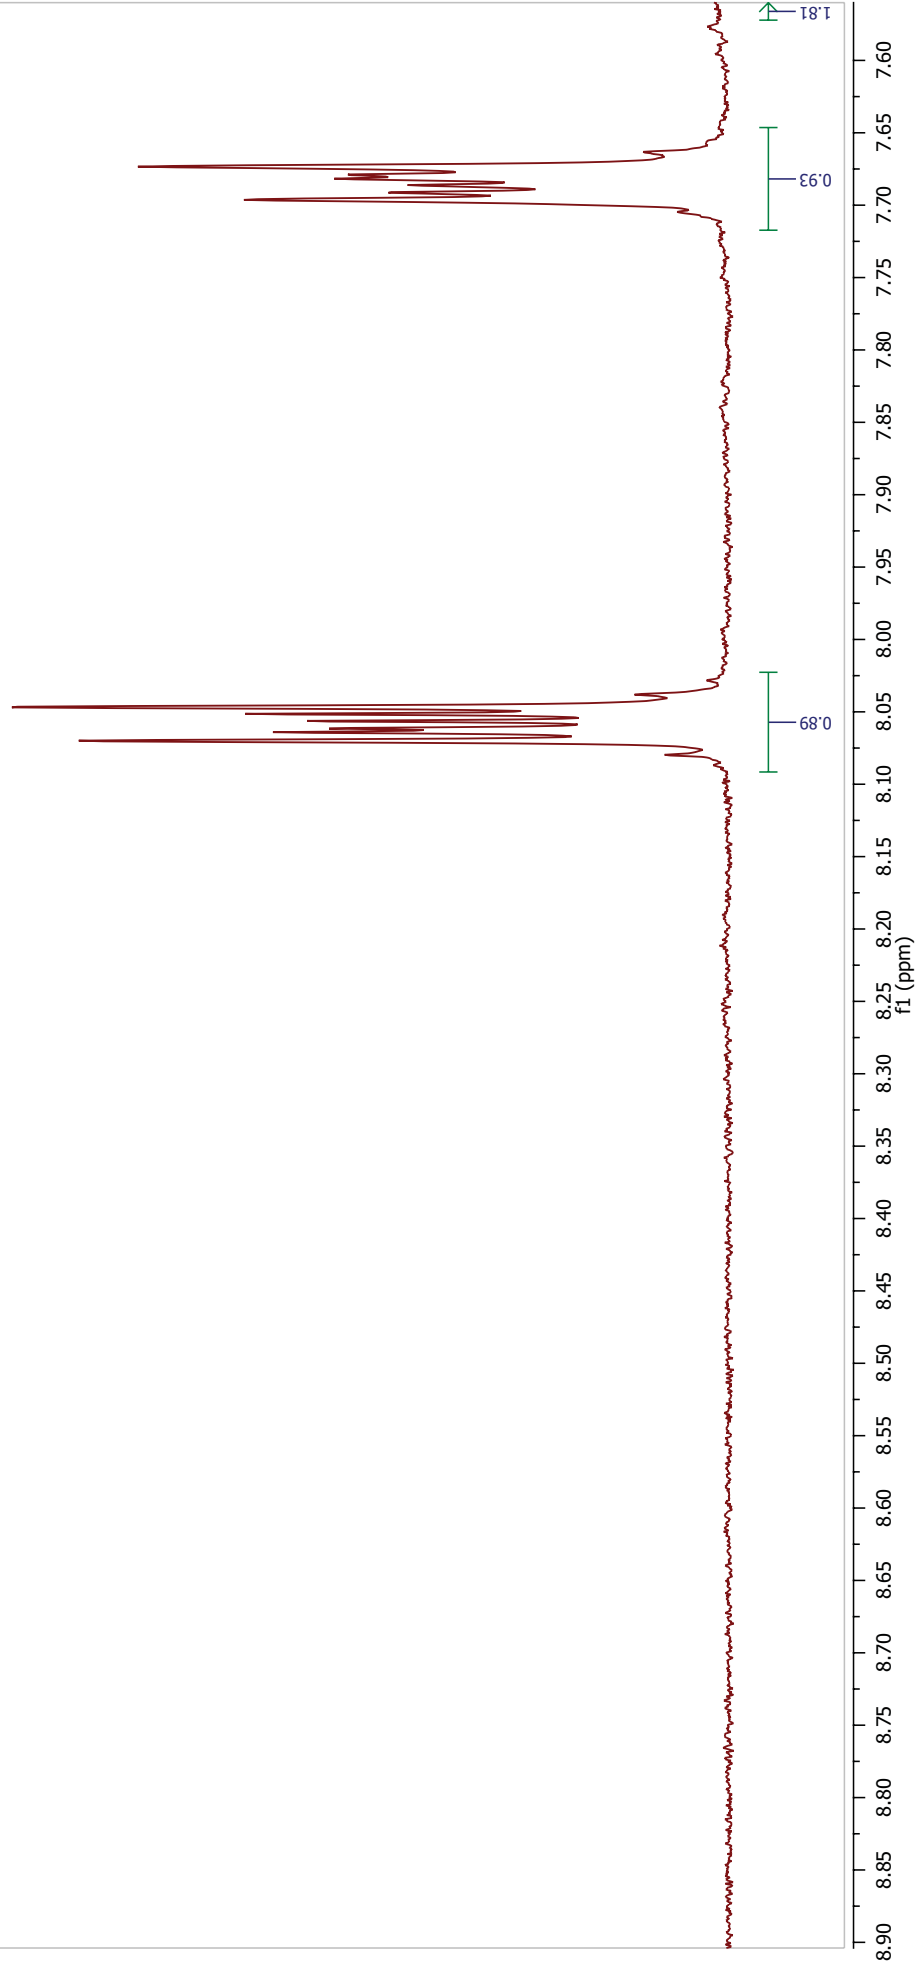

Table 2, Entry 1



Purified major diastereomer

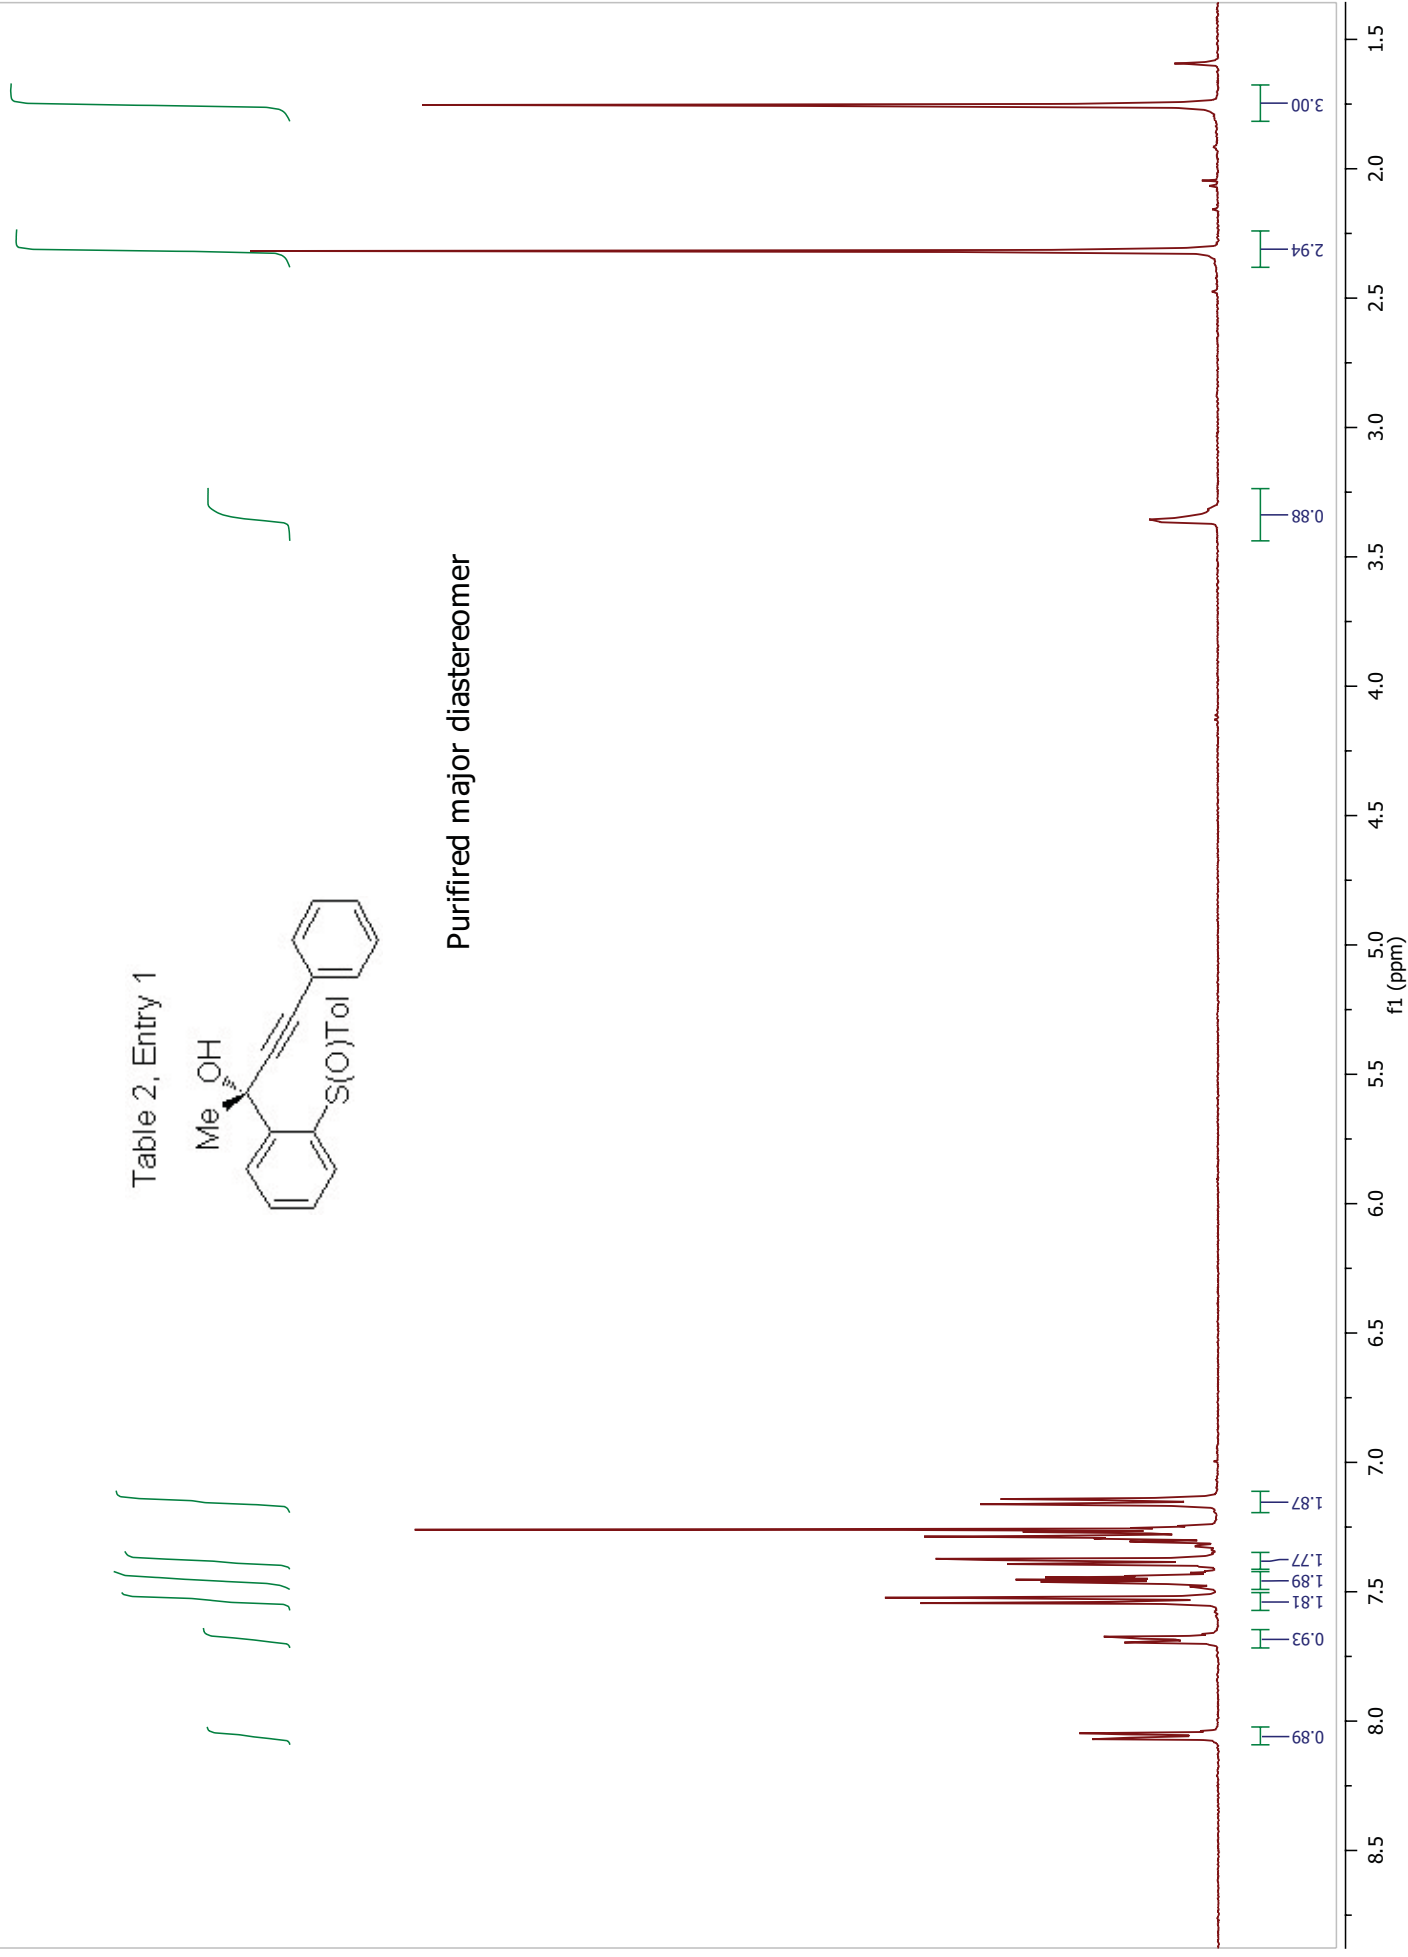

Table 2, Entry 1

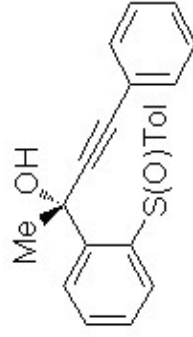

Purified minor diastereomer

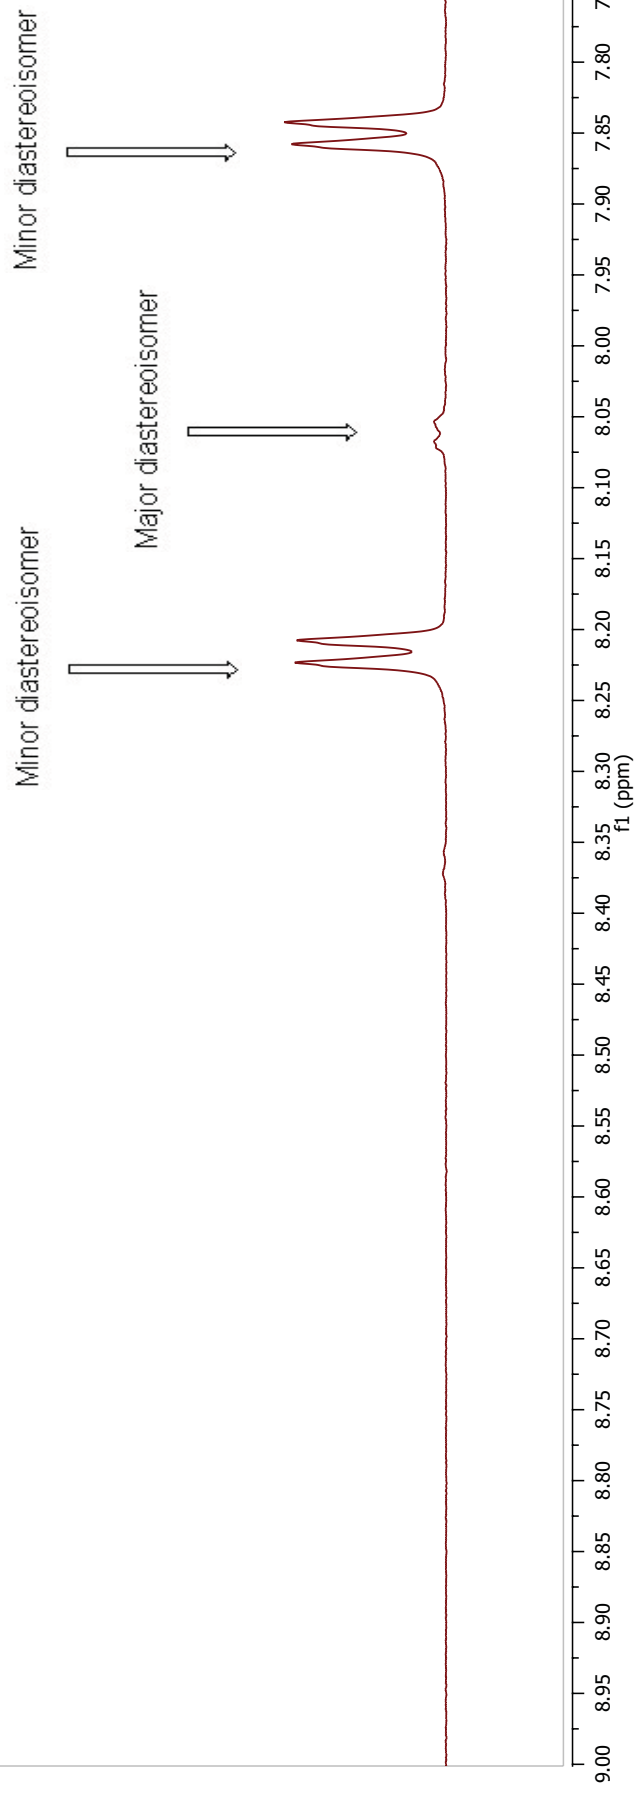



Table 2, Entry 1

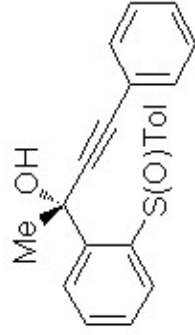

Purified minor diastereomer

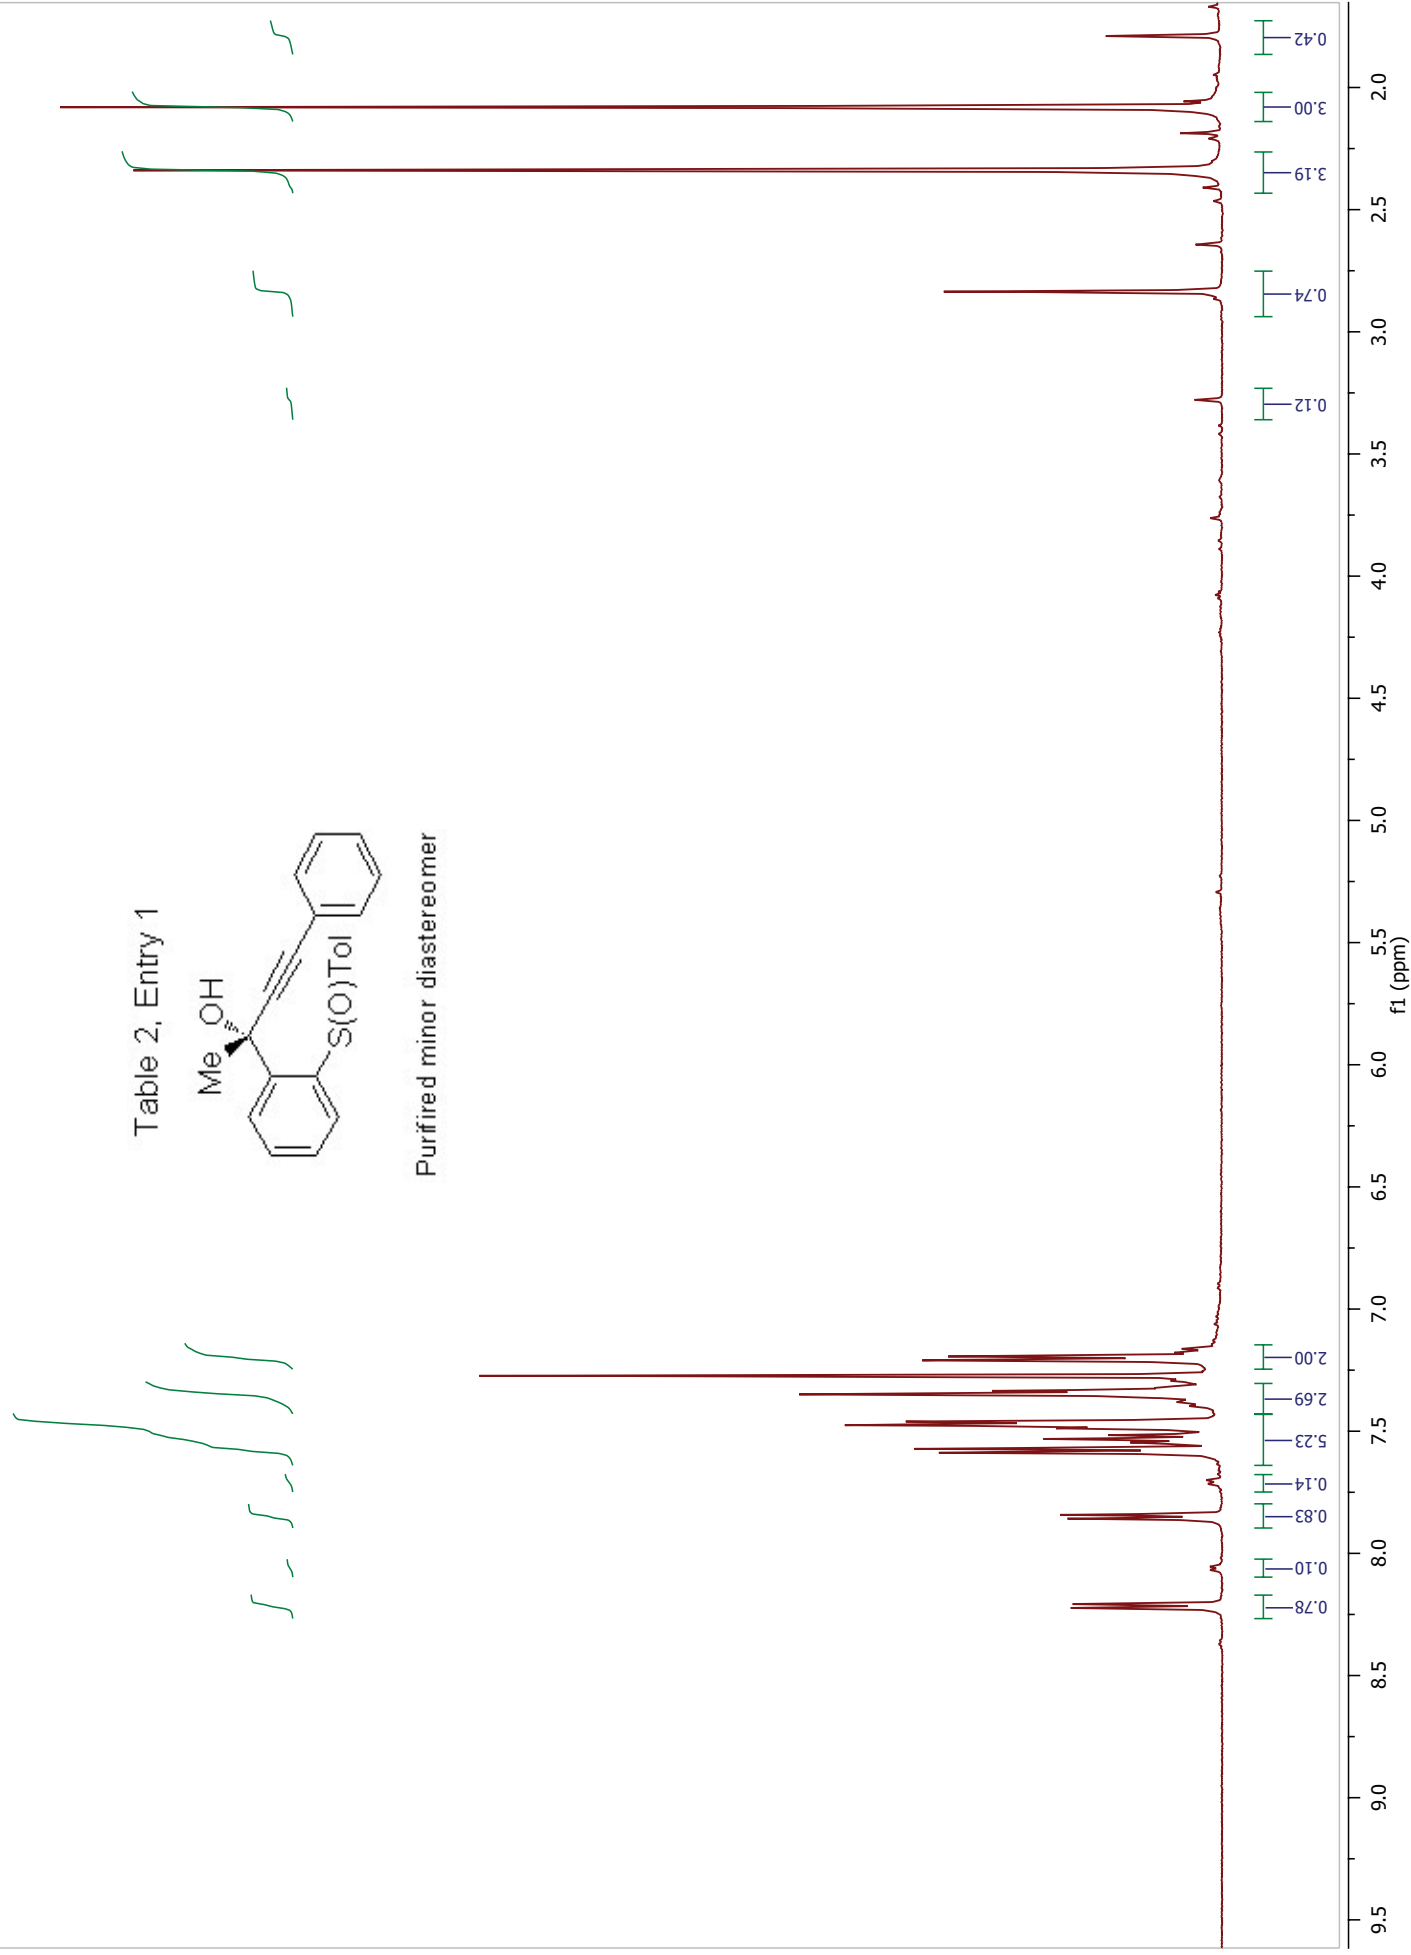

Table 2, Entry 2

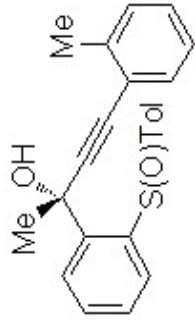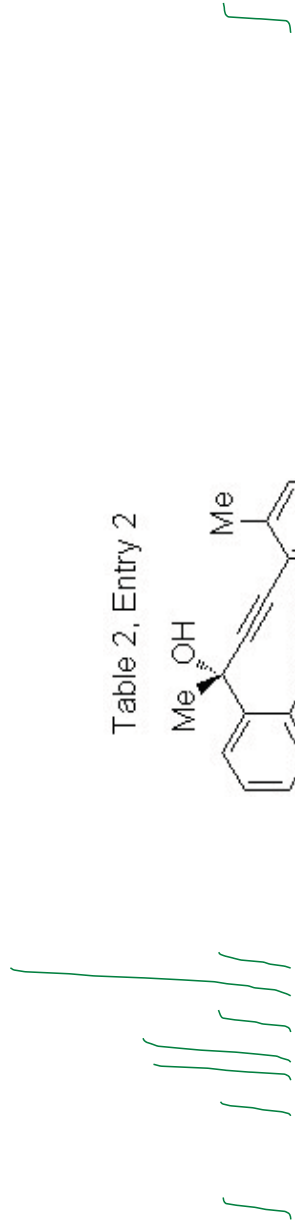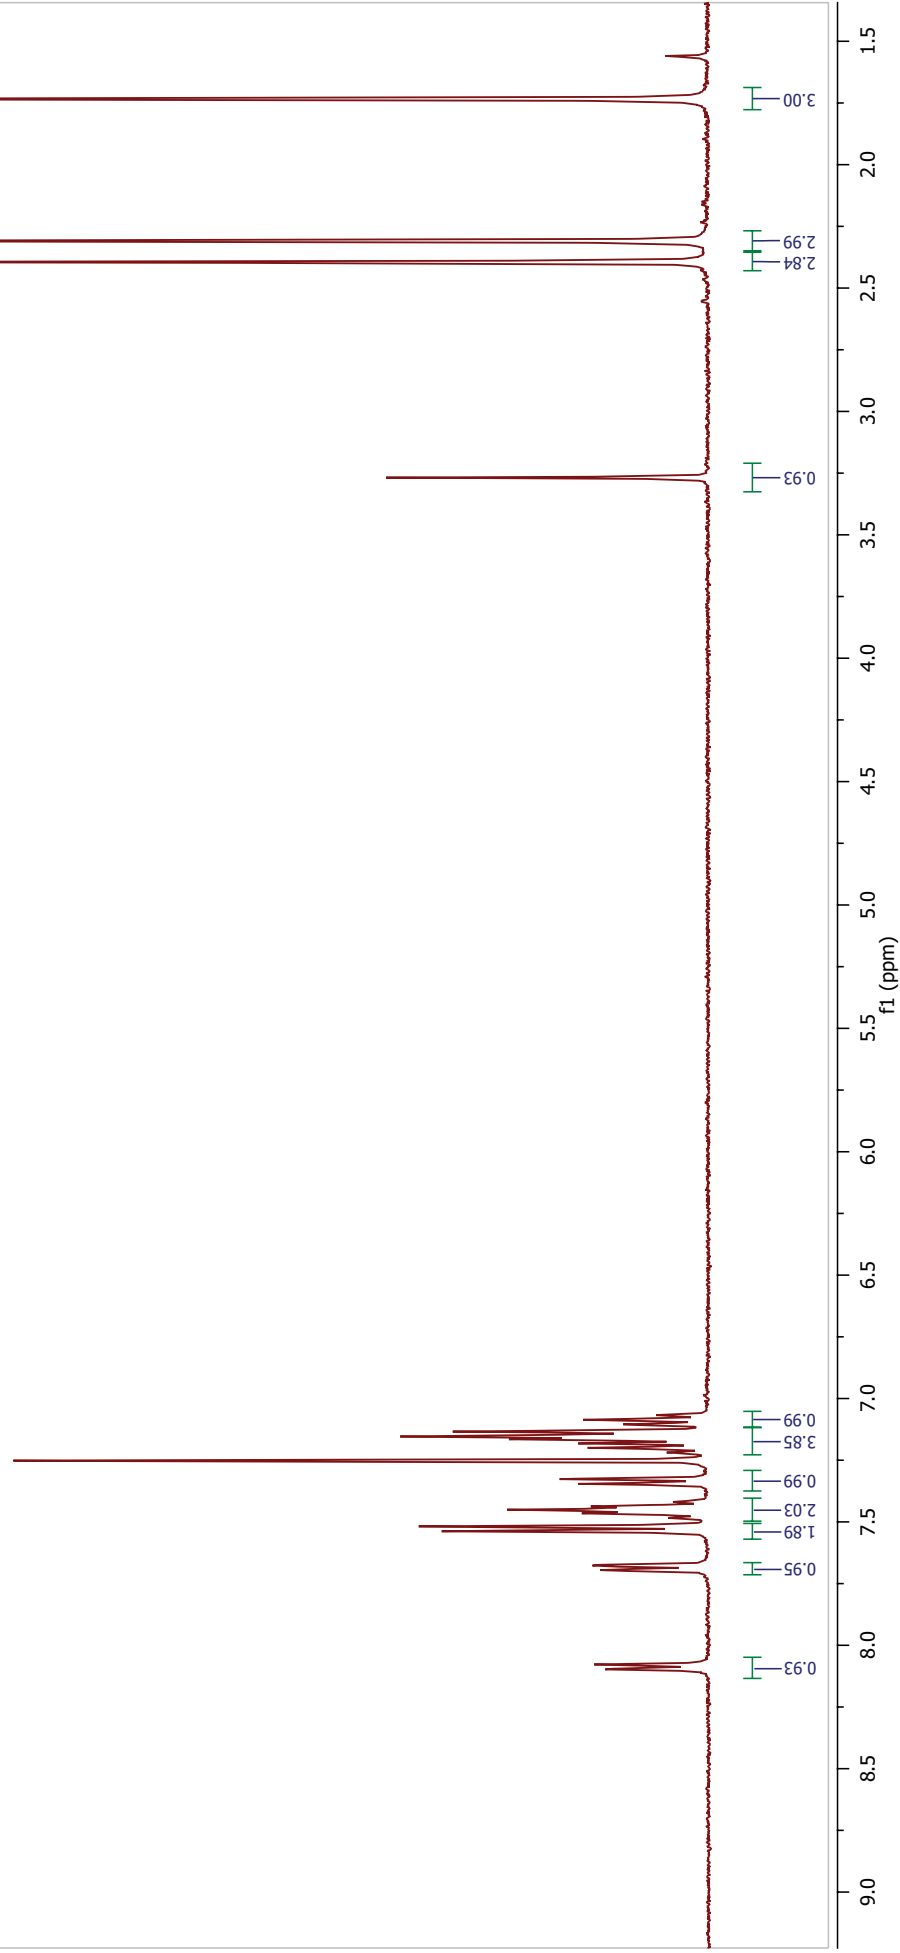

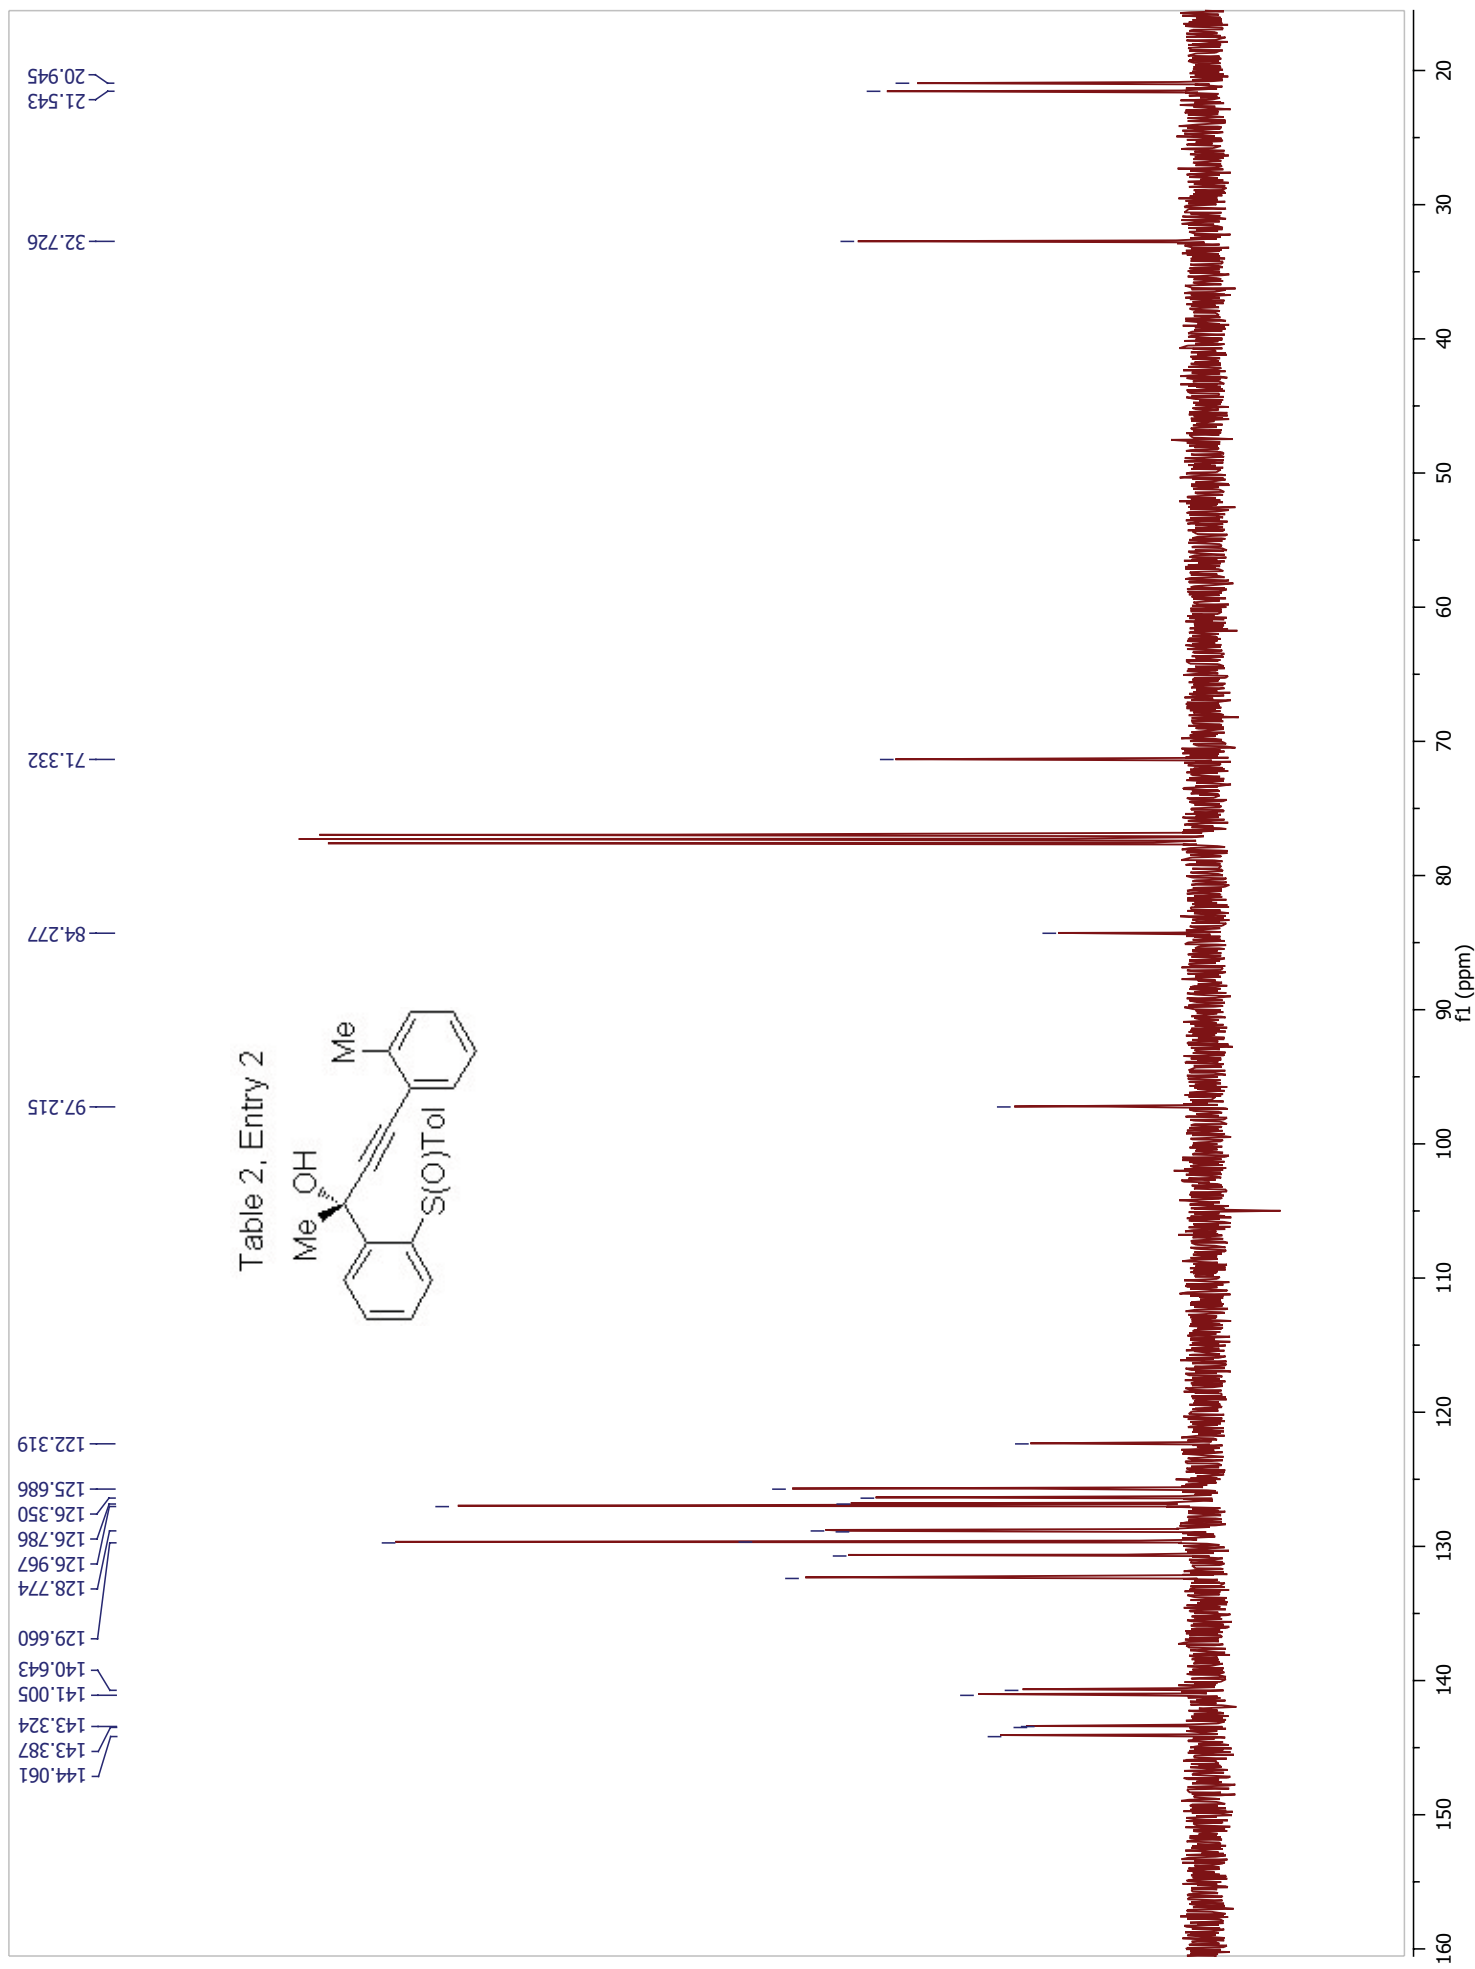

Table 2, Entry 3

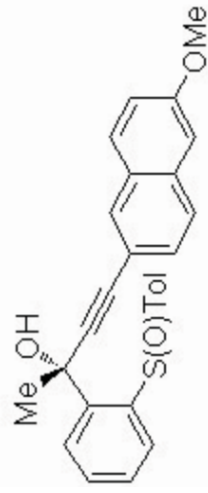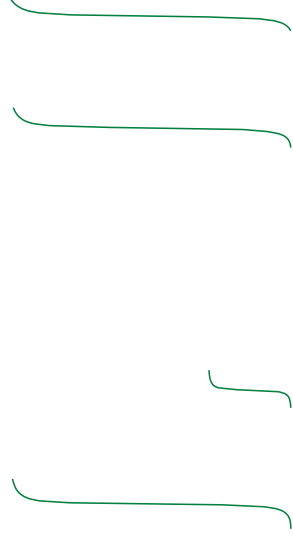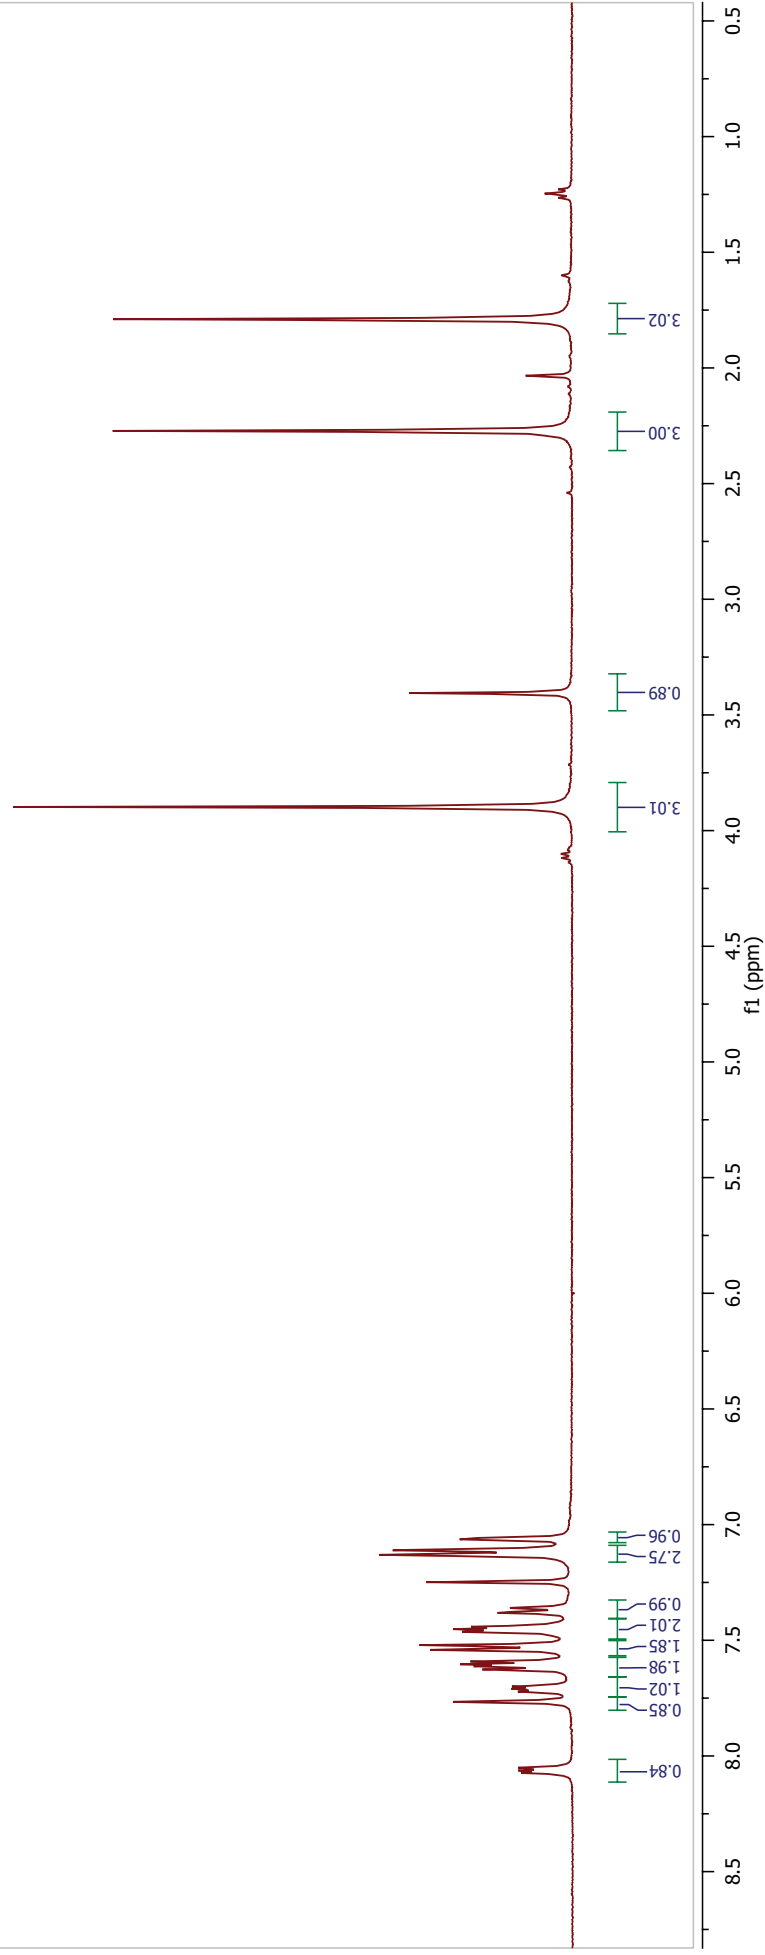

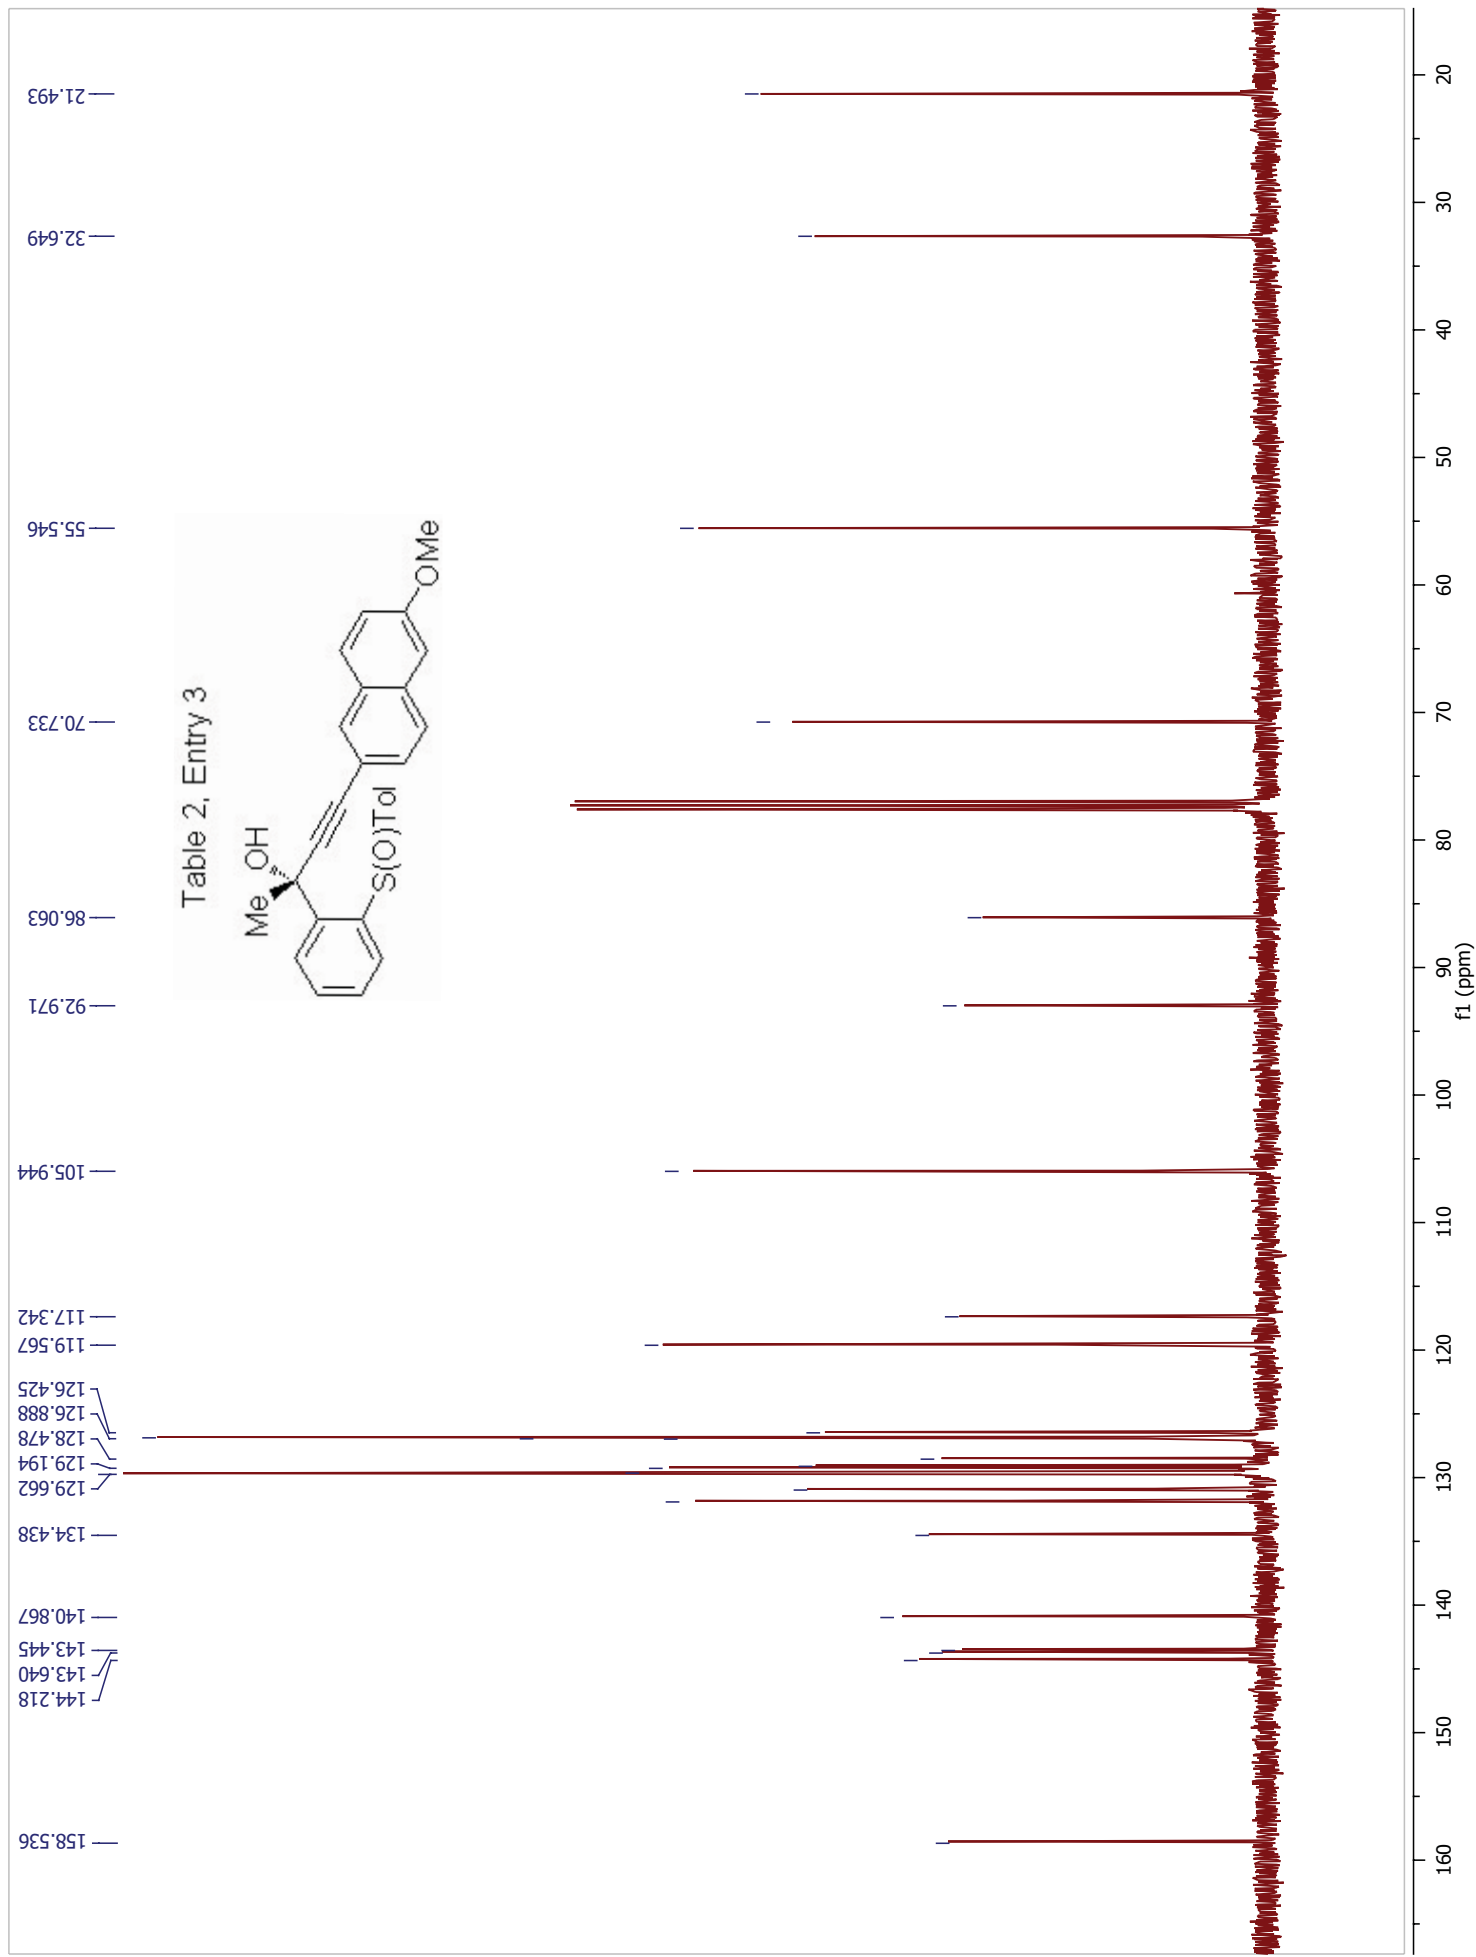

Table 2, Entry 4

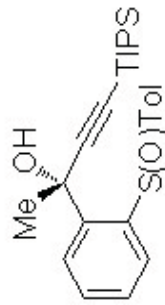

~ ~ ~ ~

~ ~ ~ ~

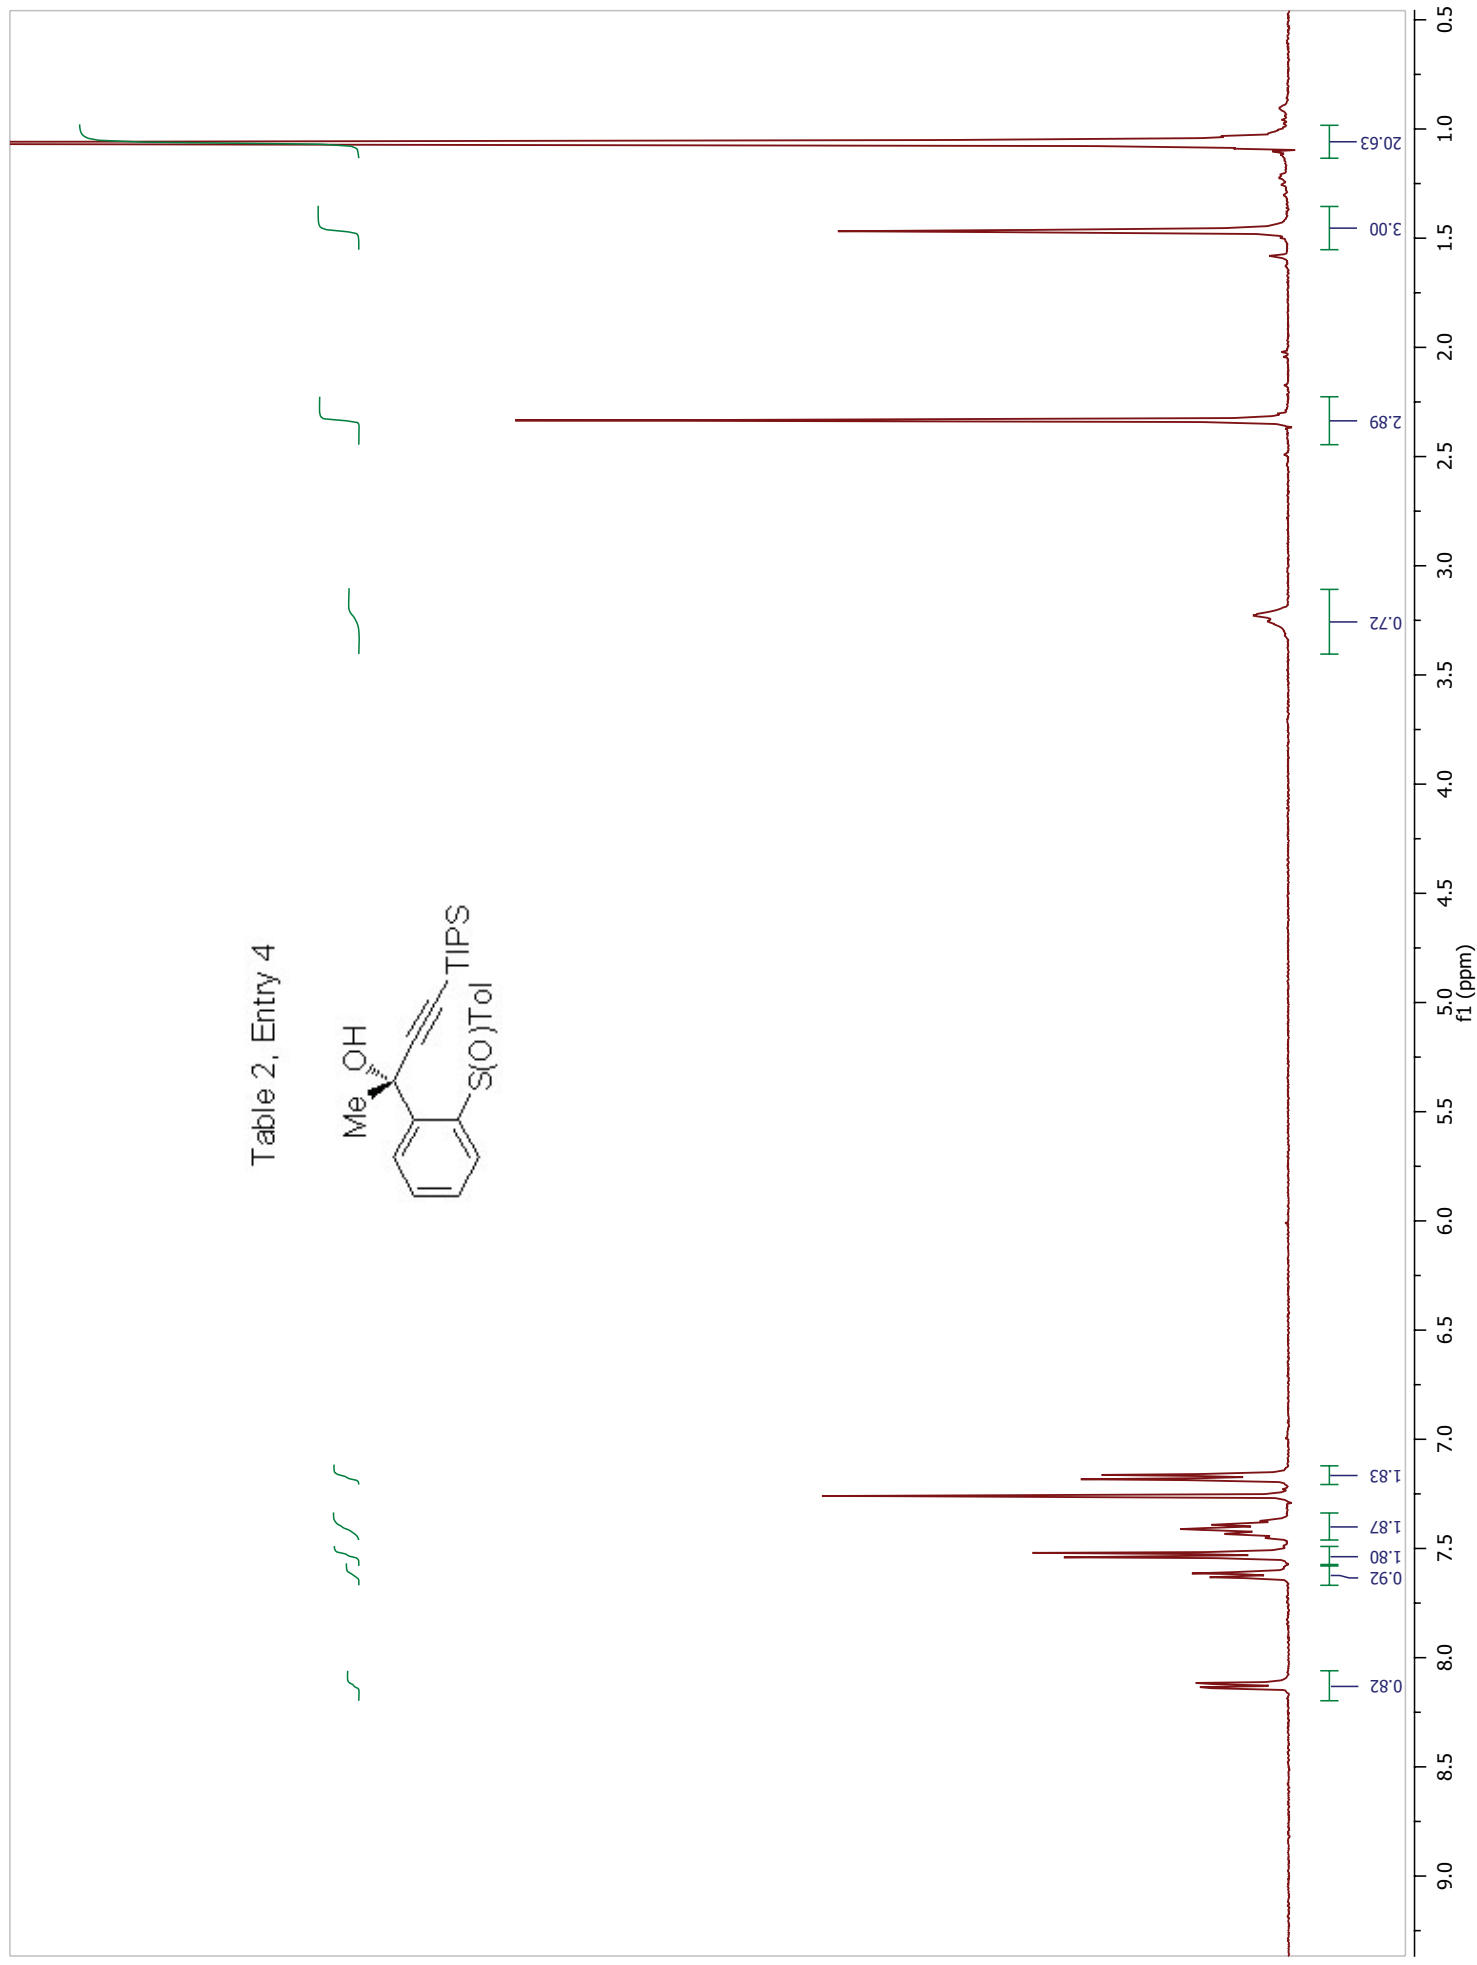

Table 2, Entry 4

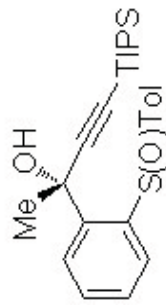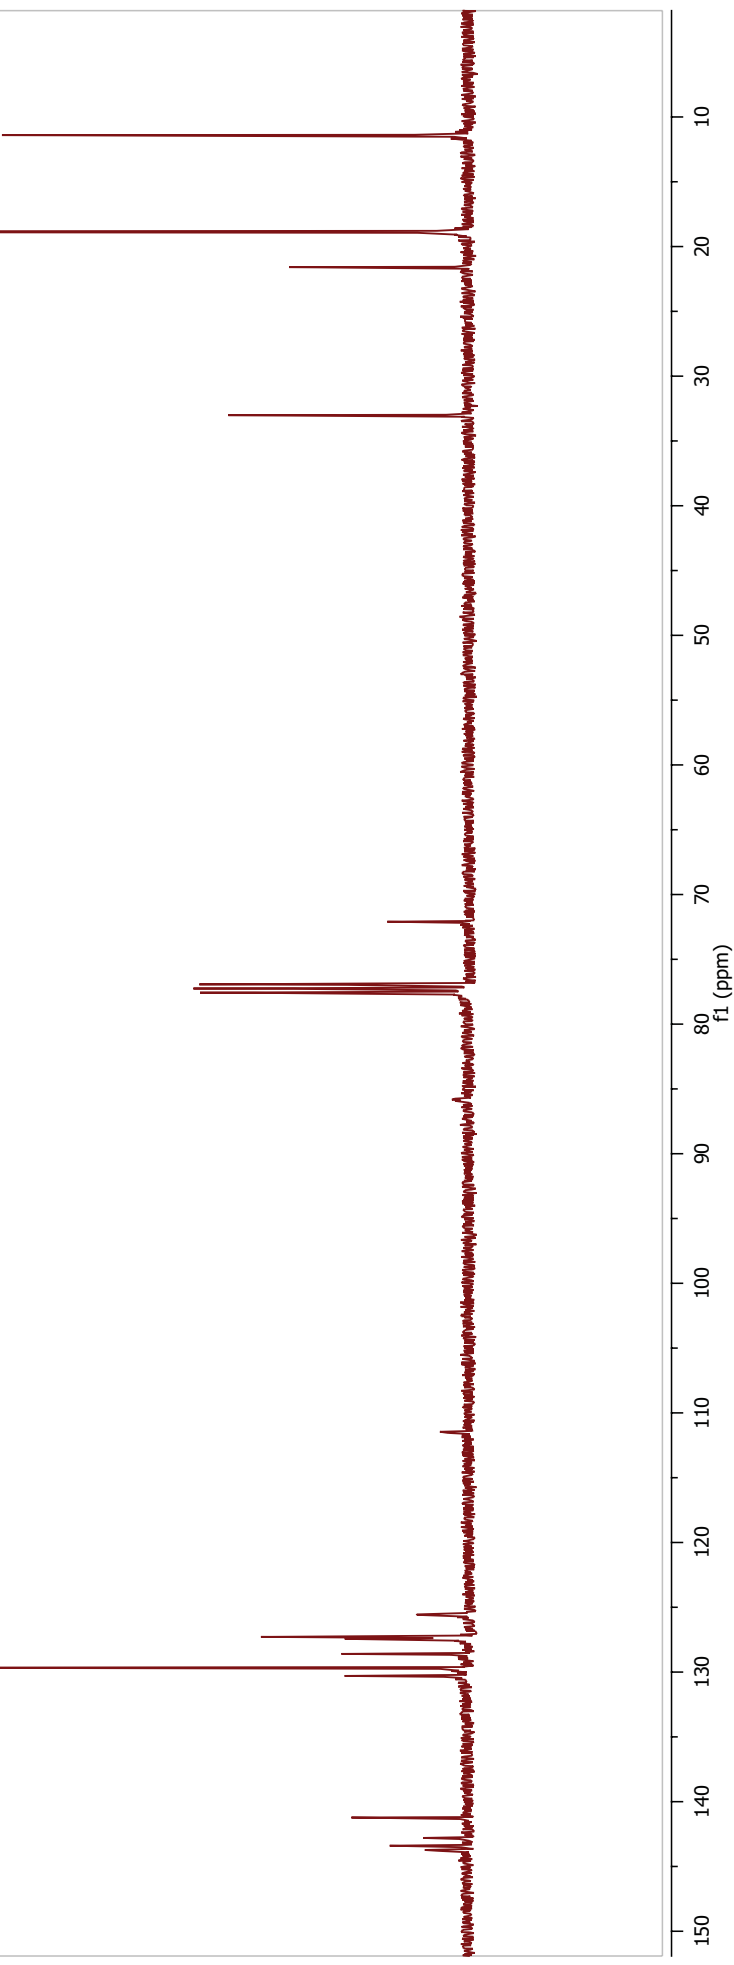

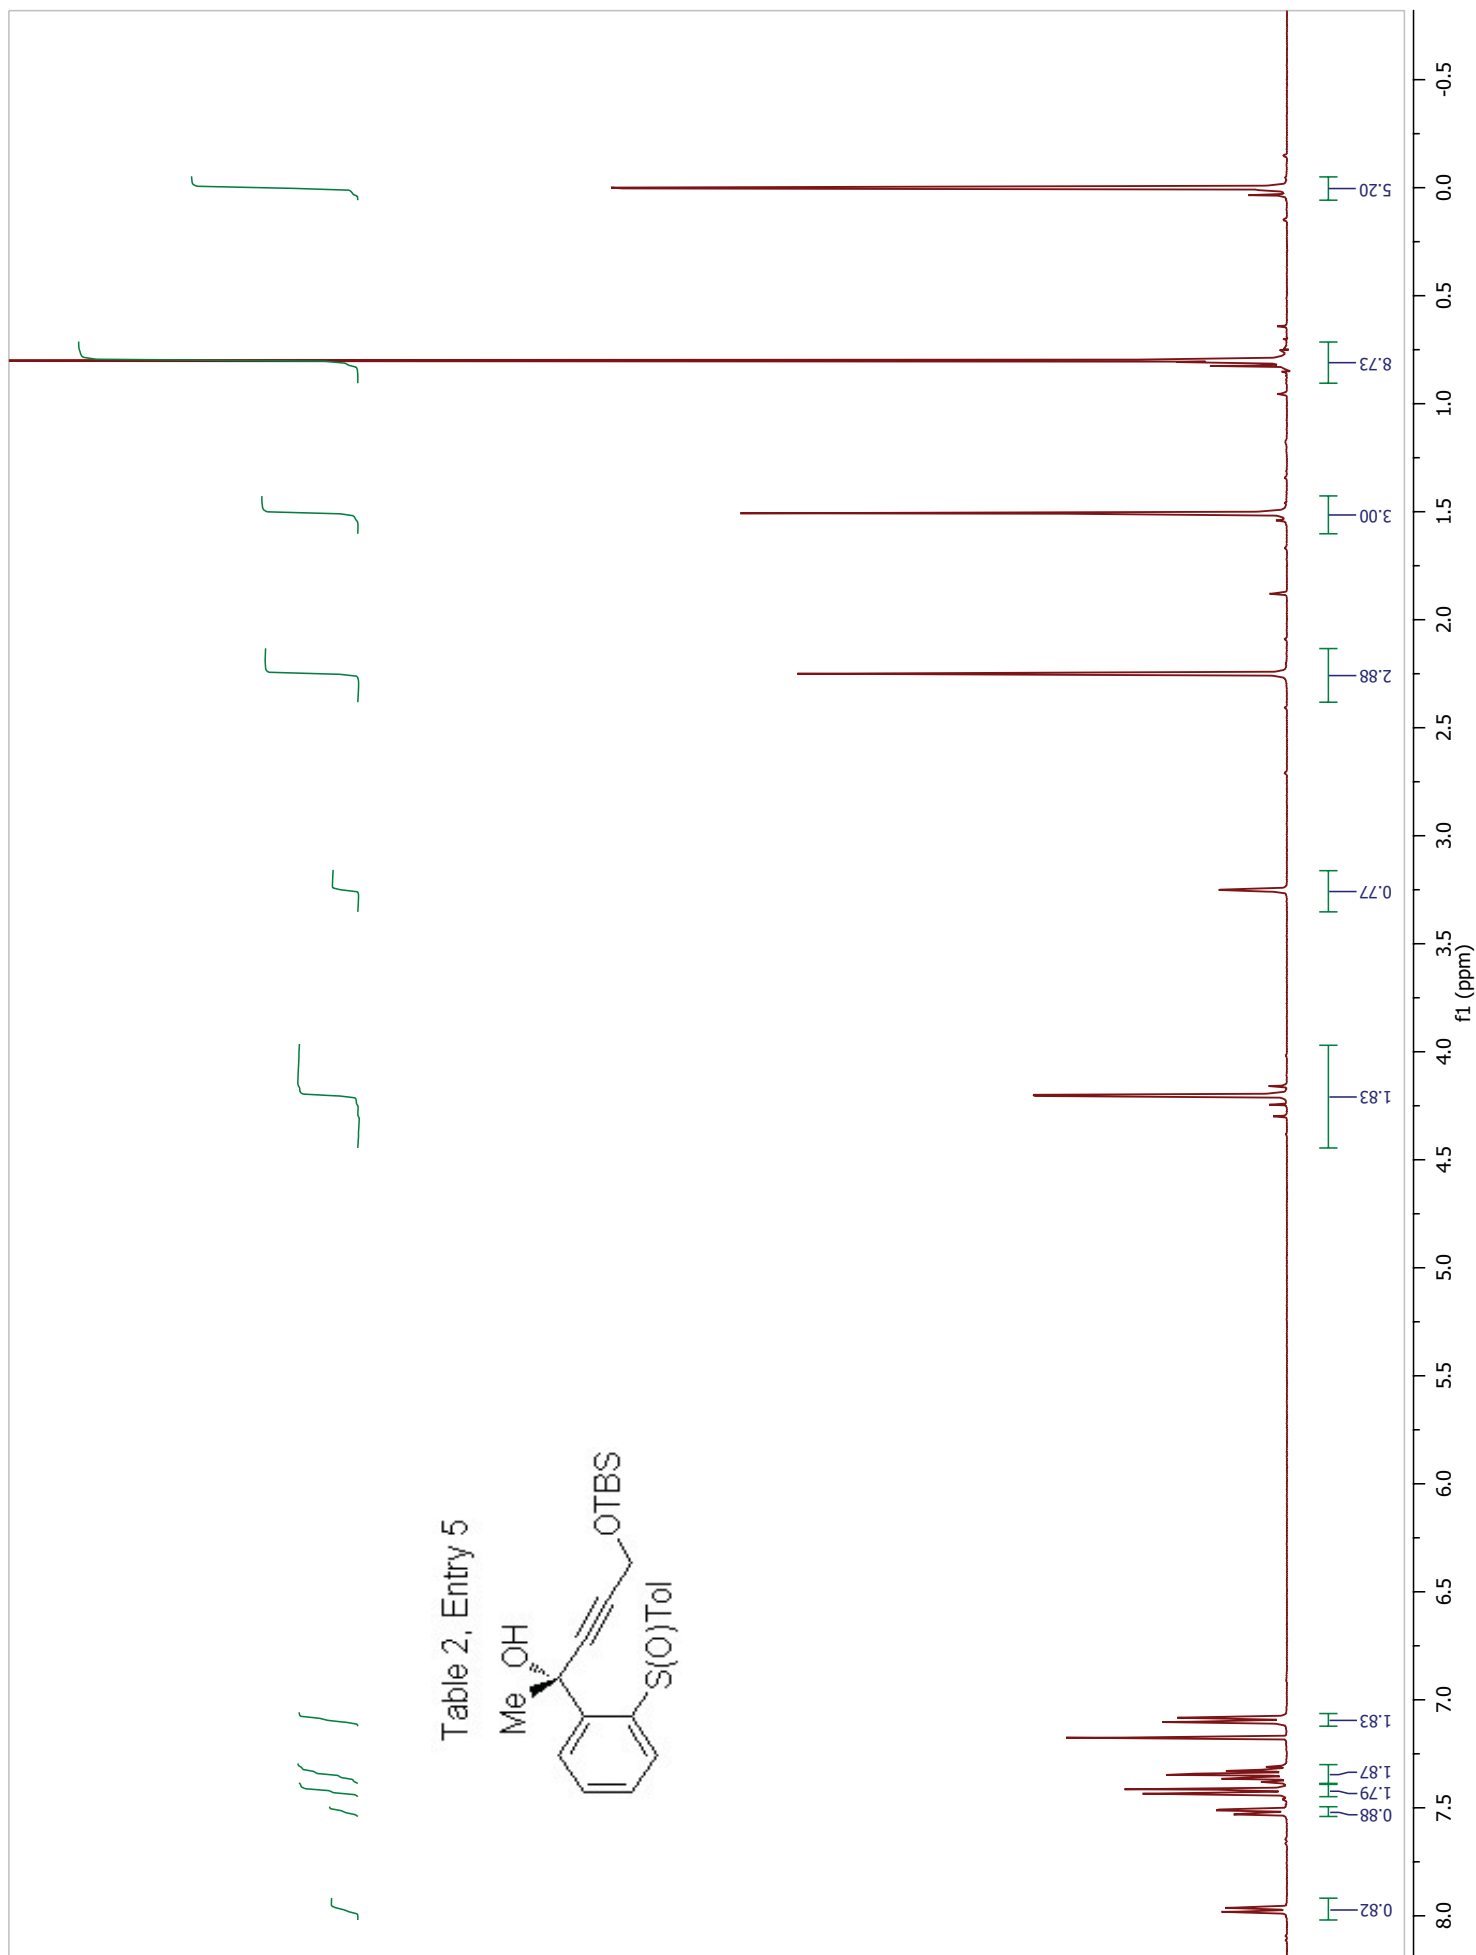



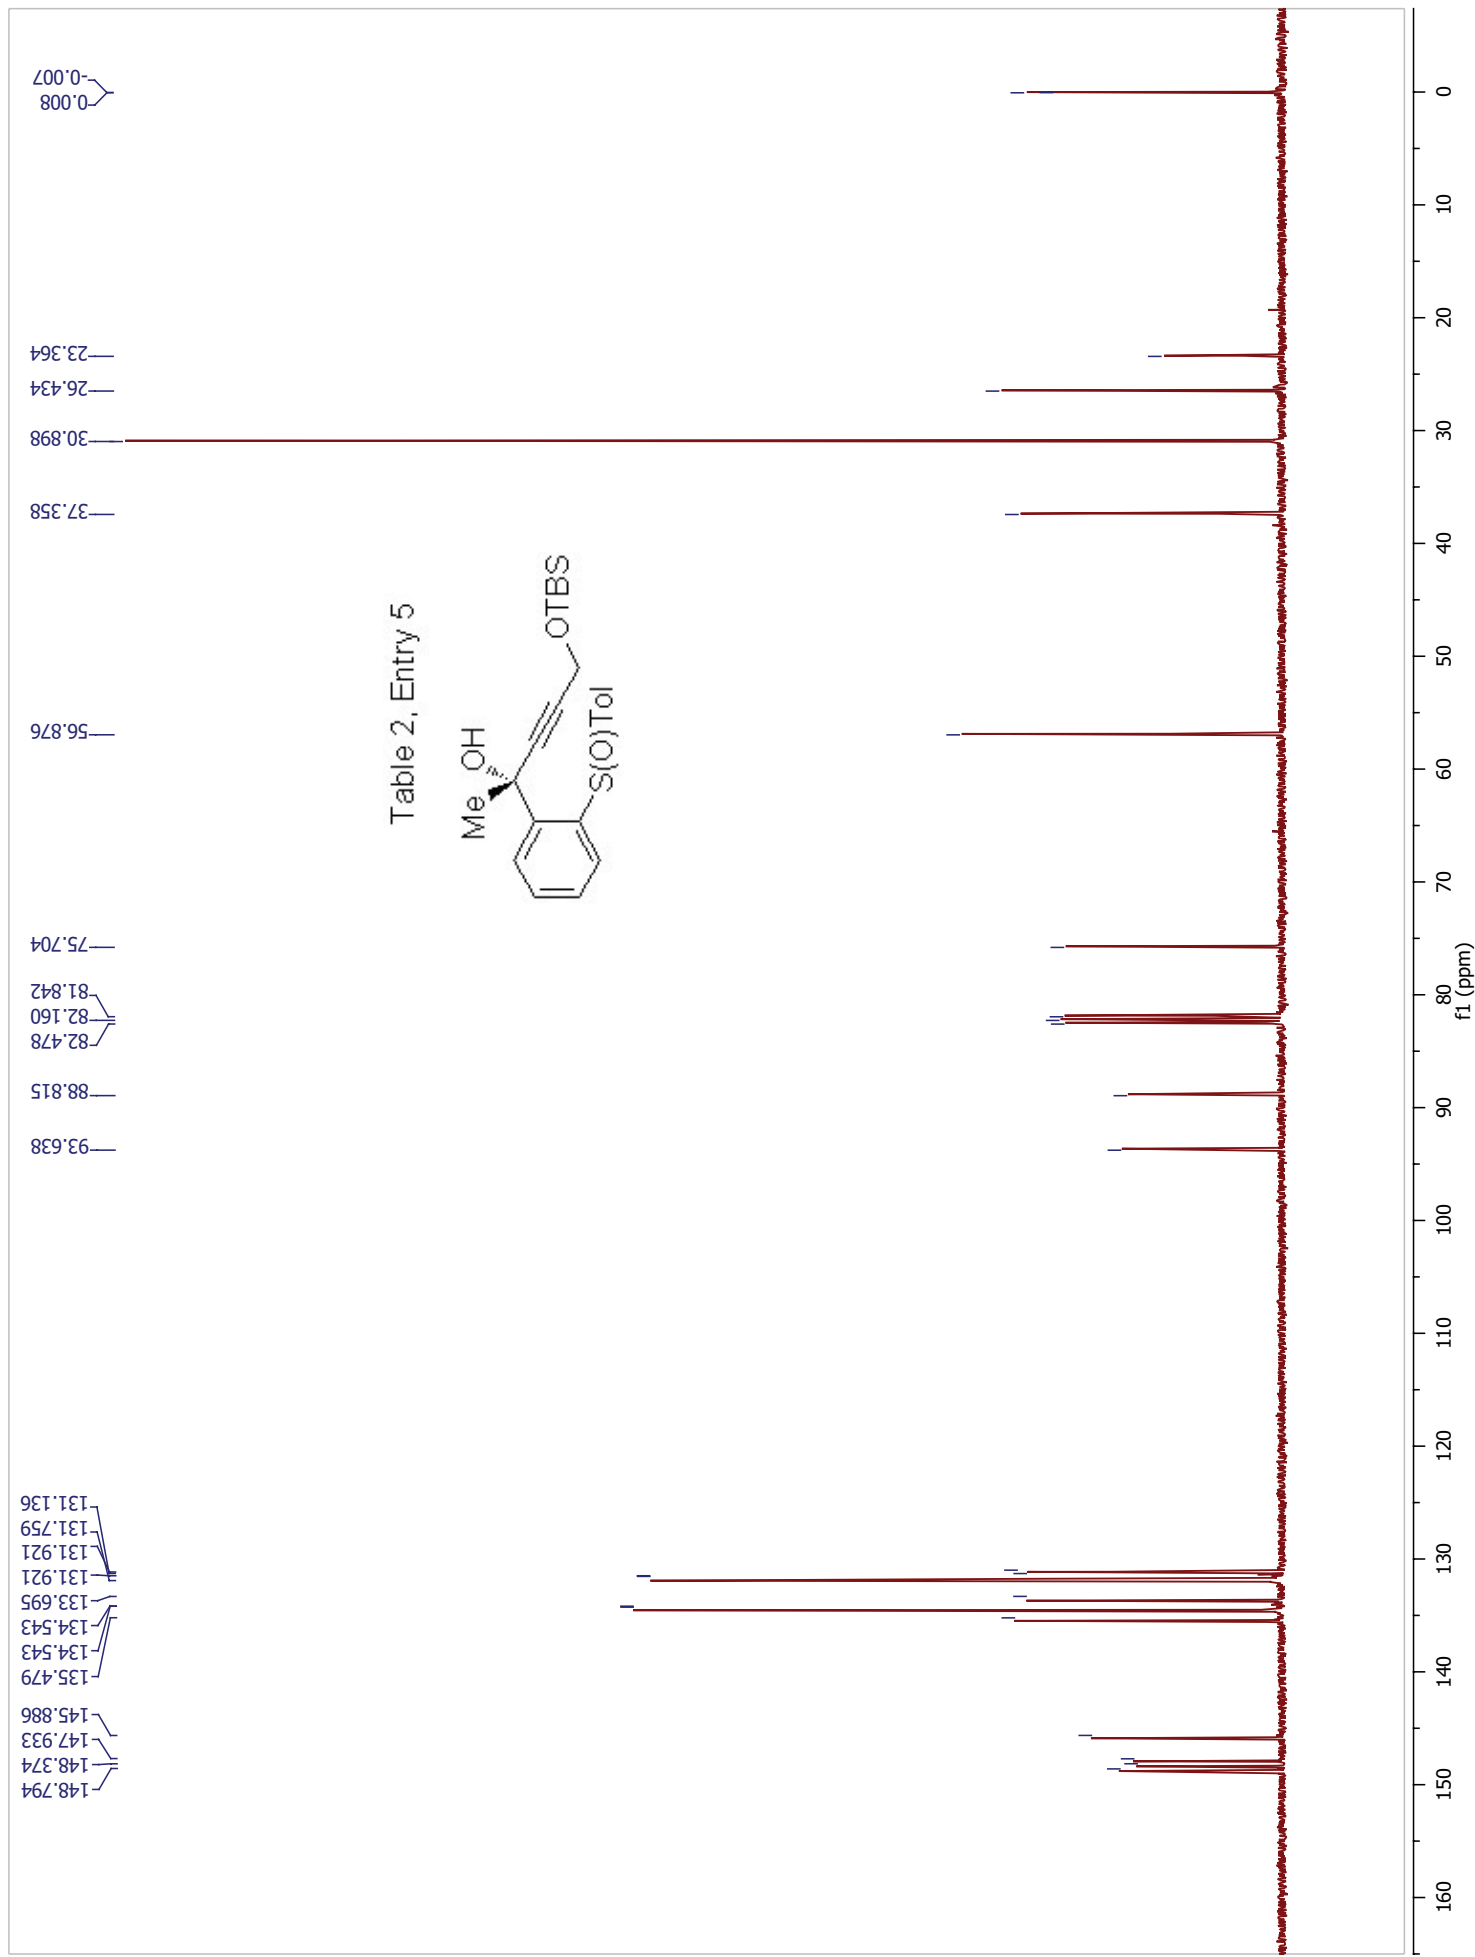

Table 2, Entry 6

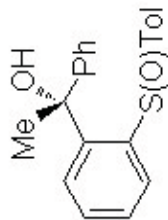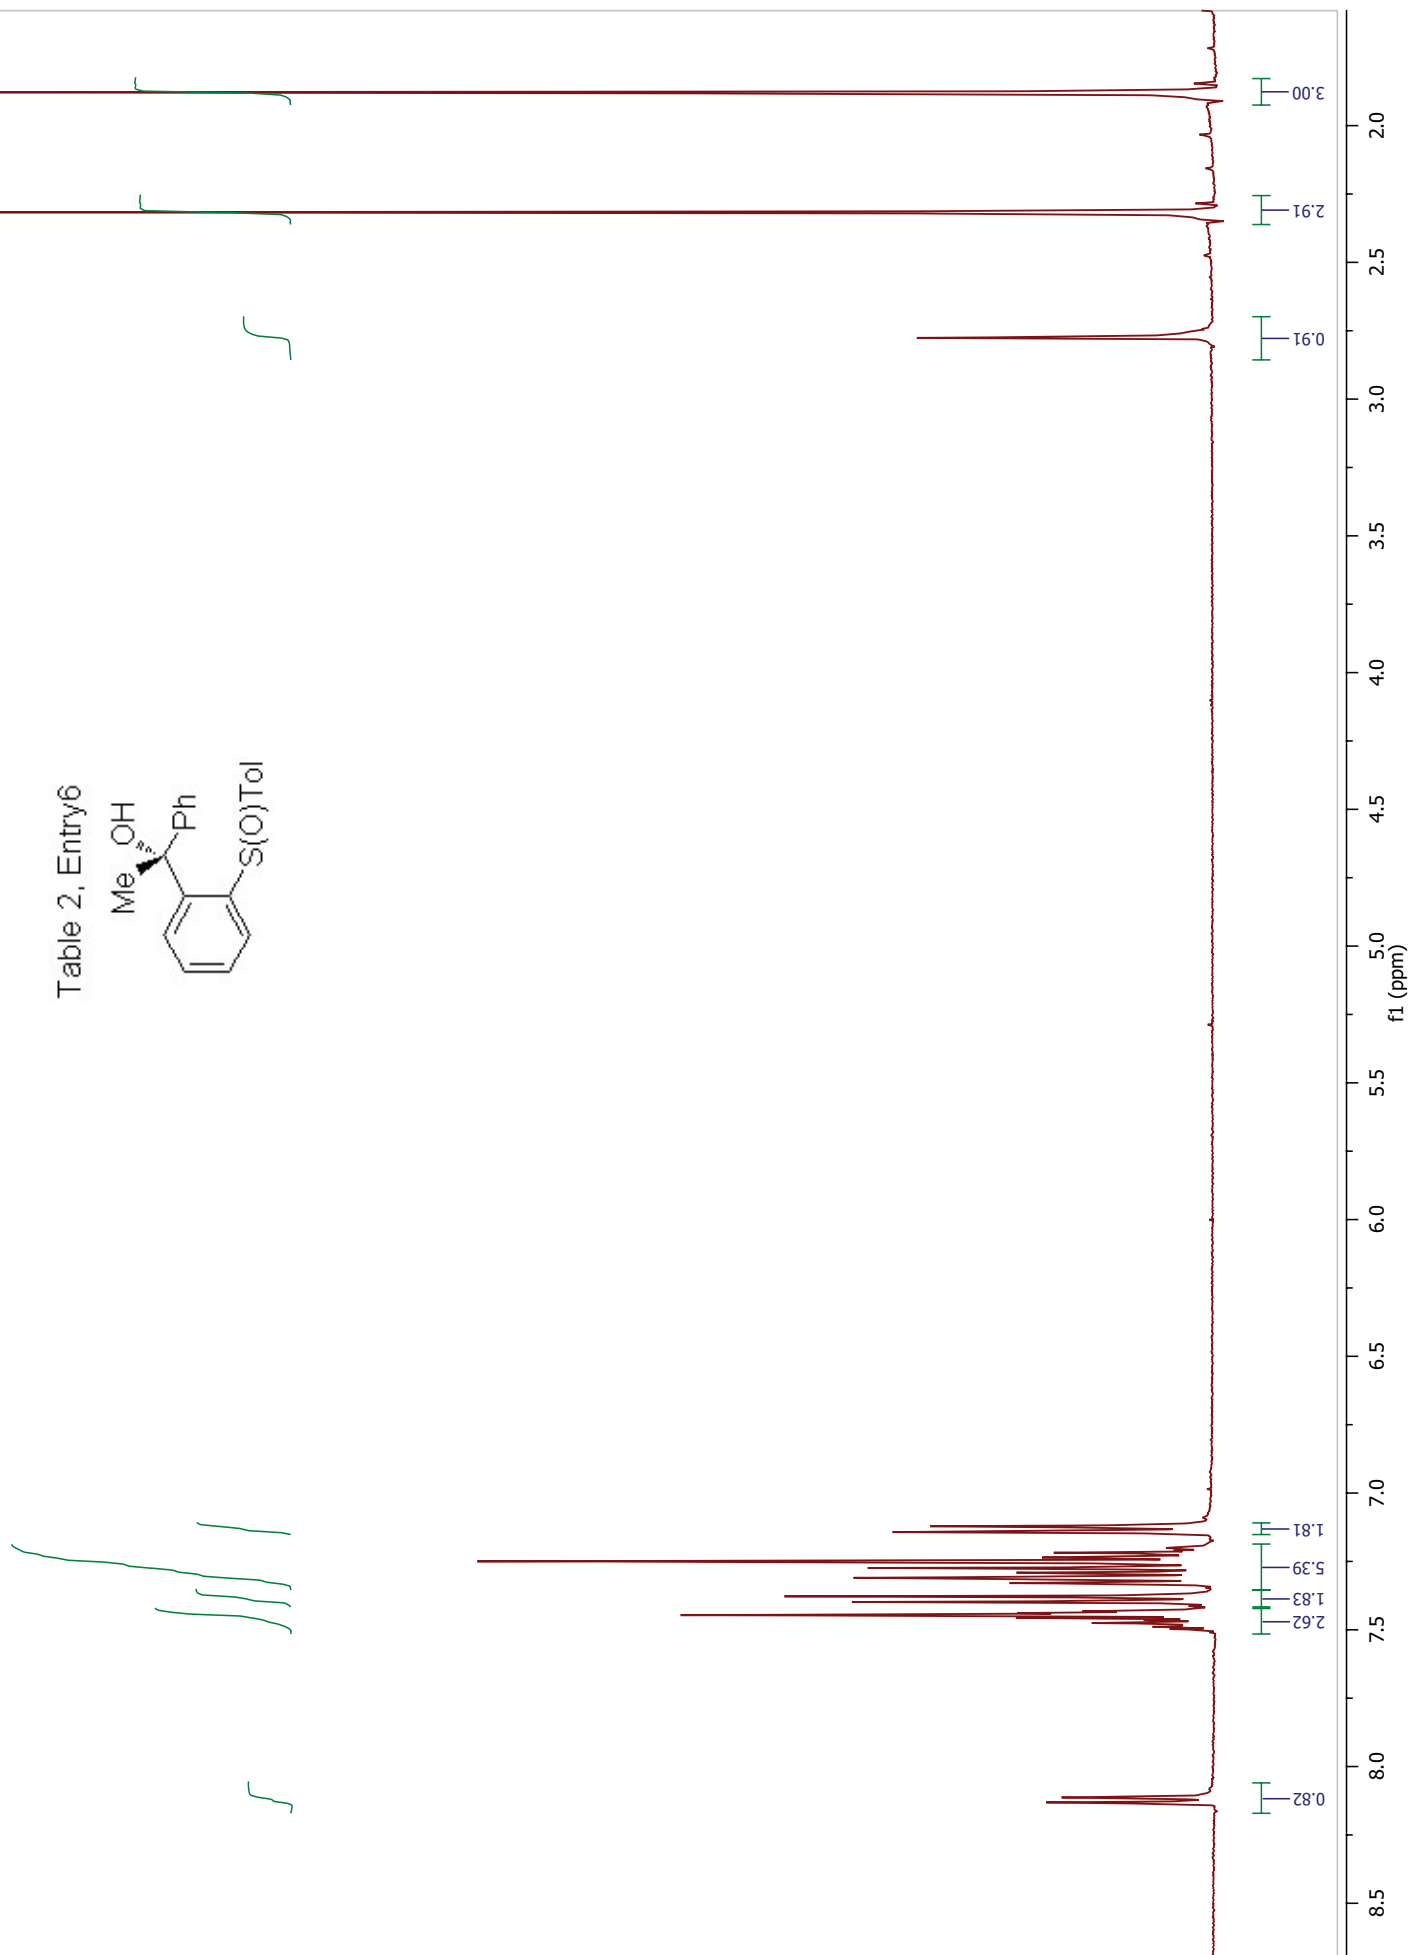

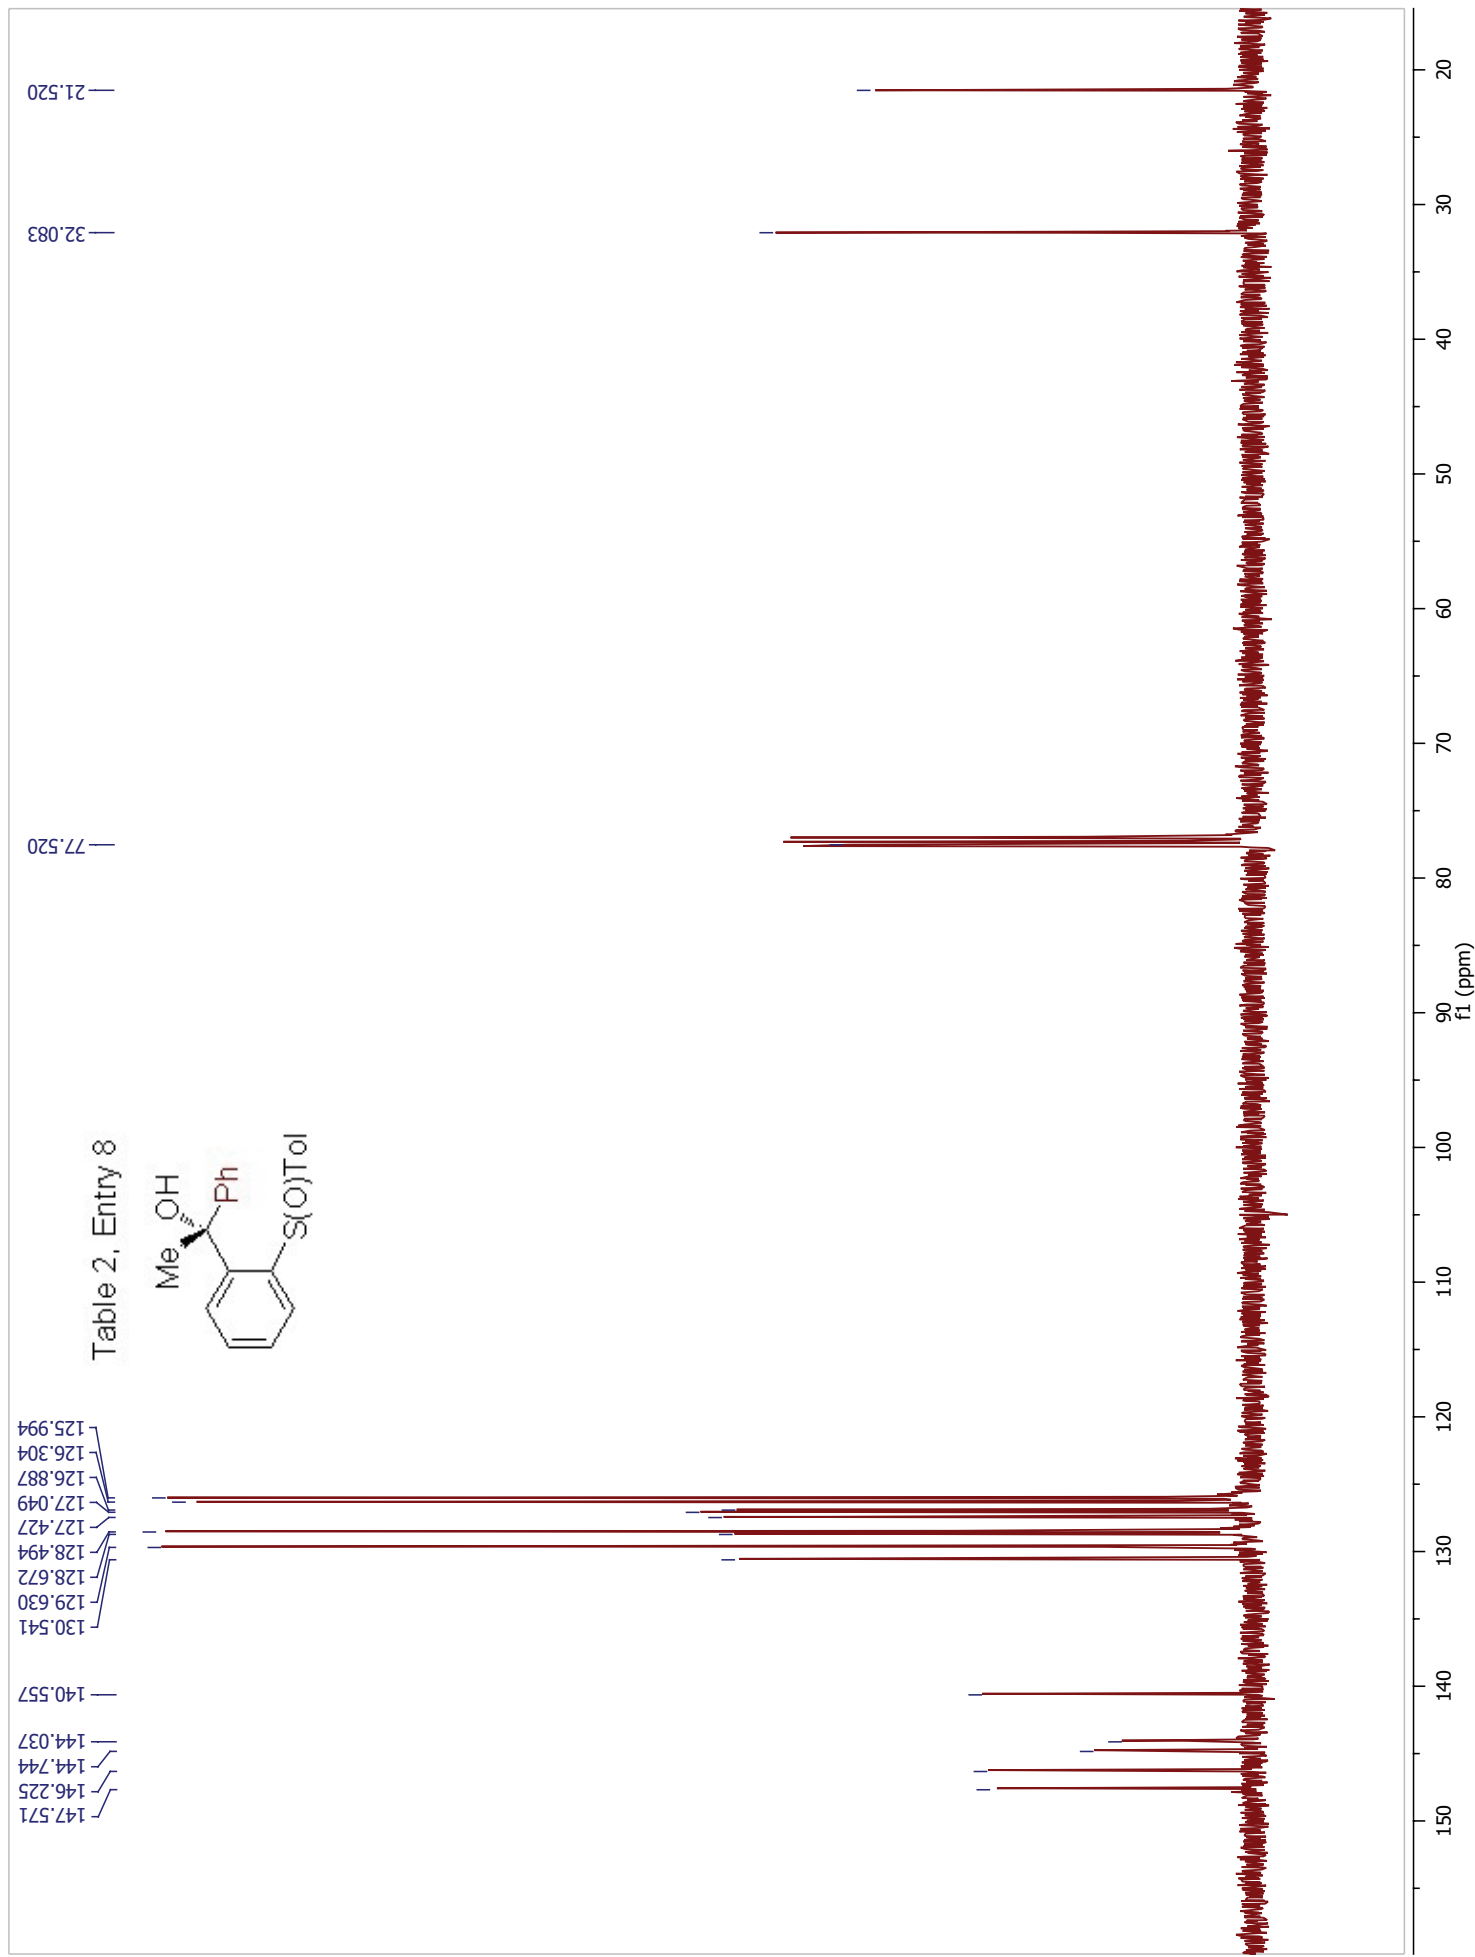

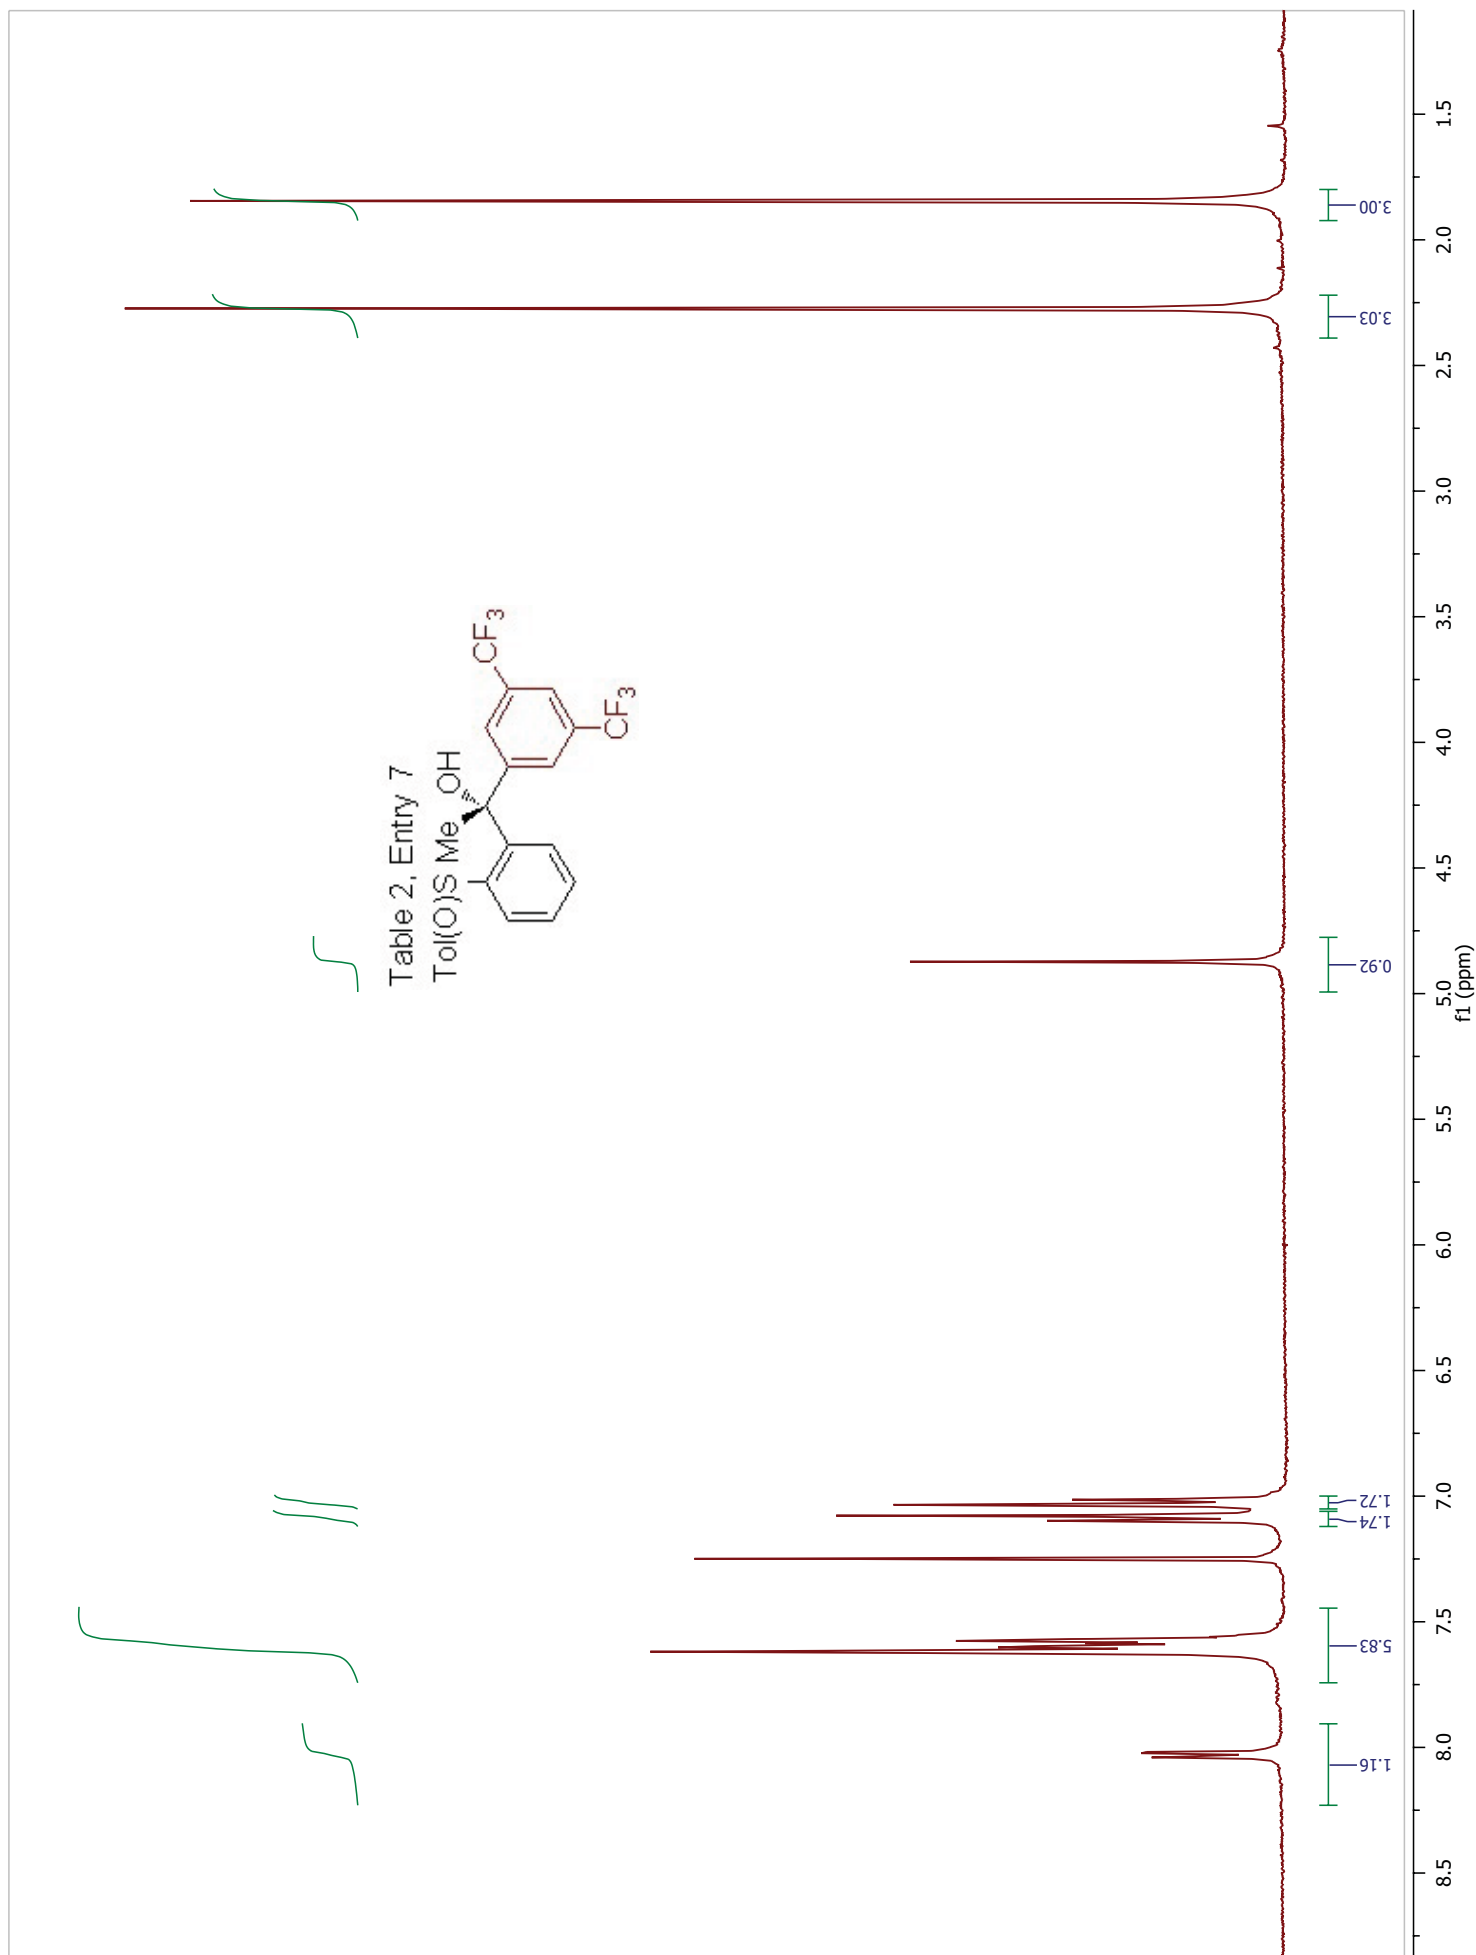

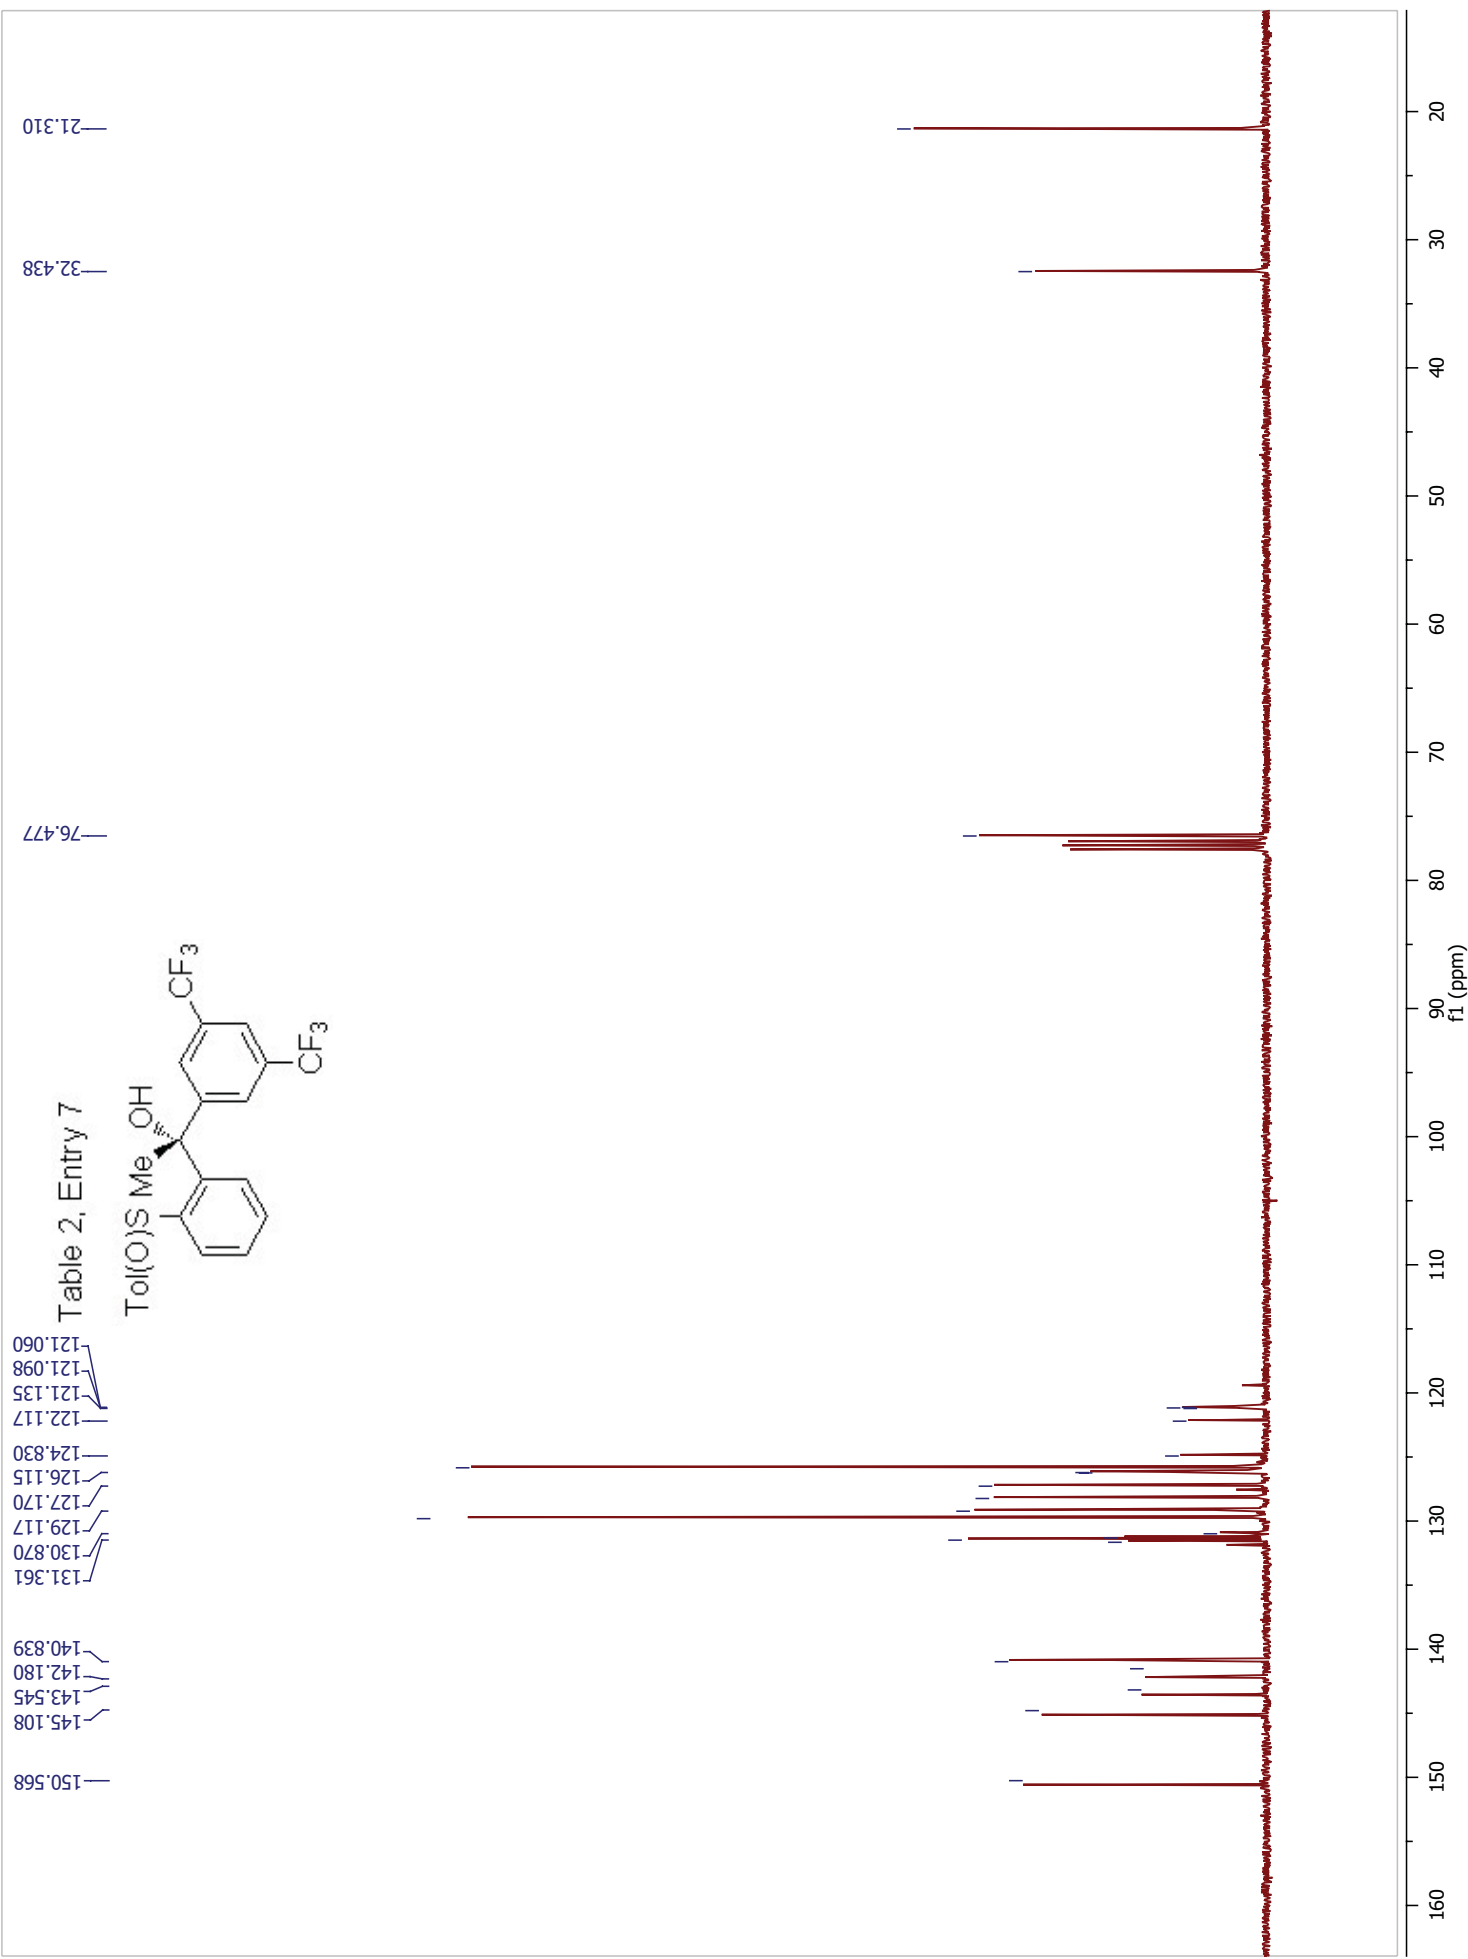

Table 2, Entry 8

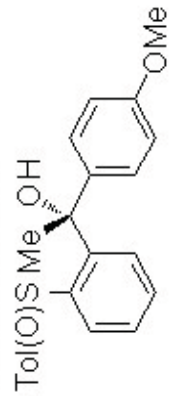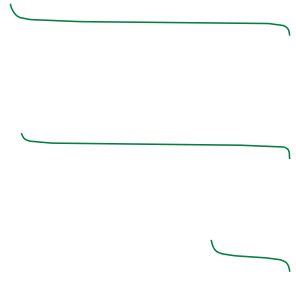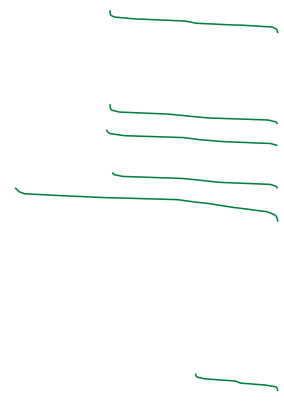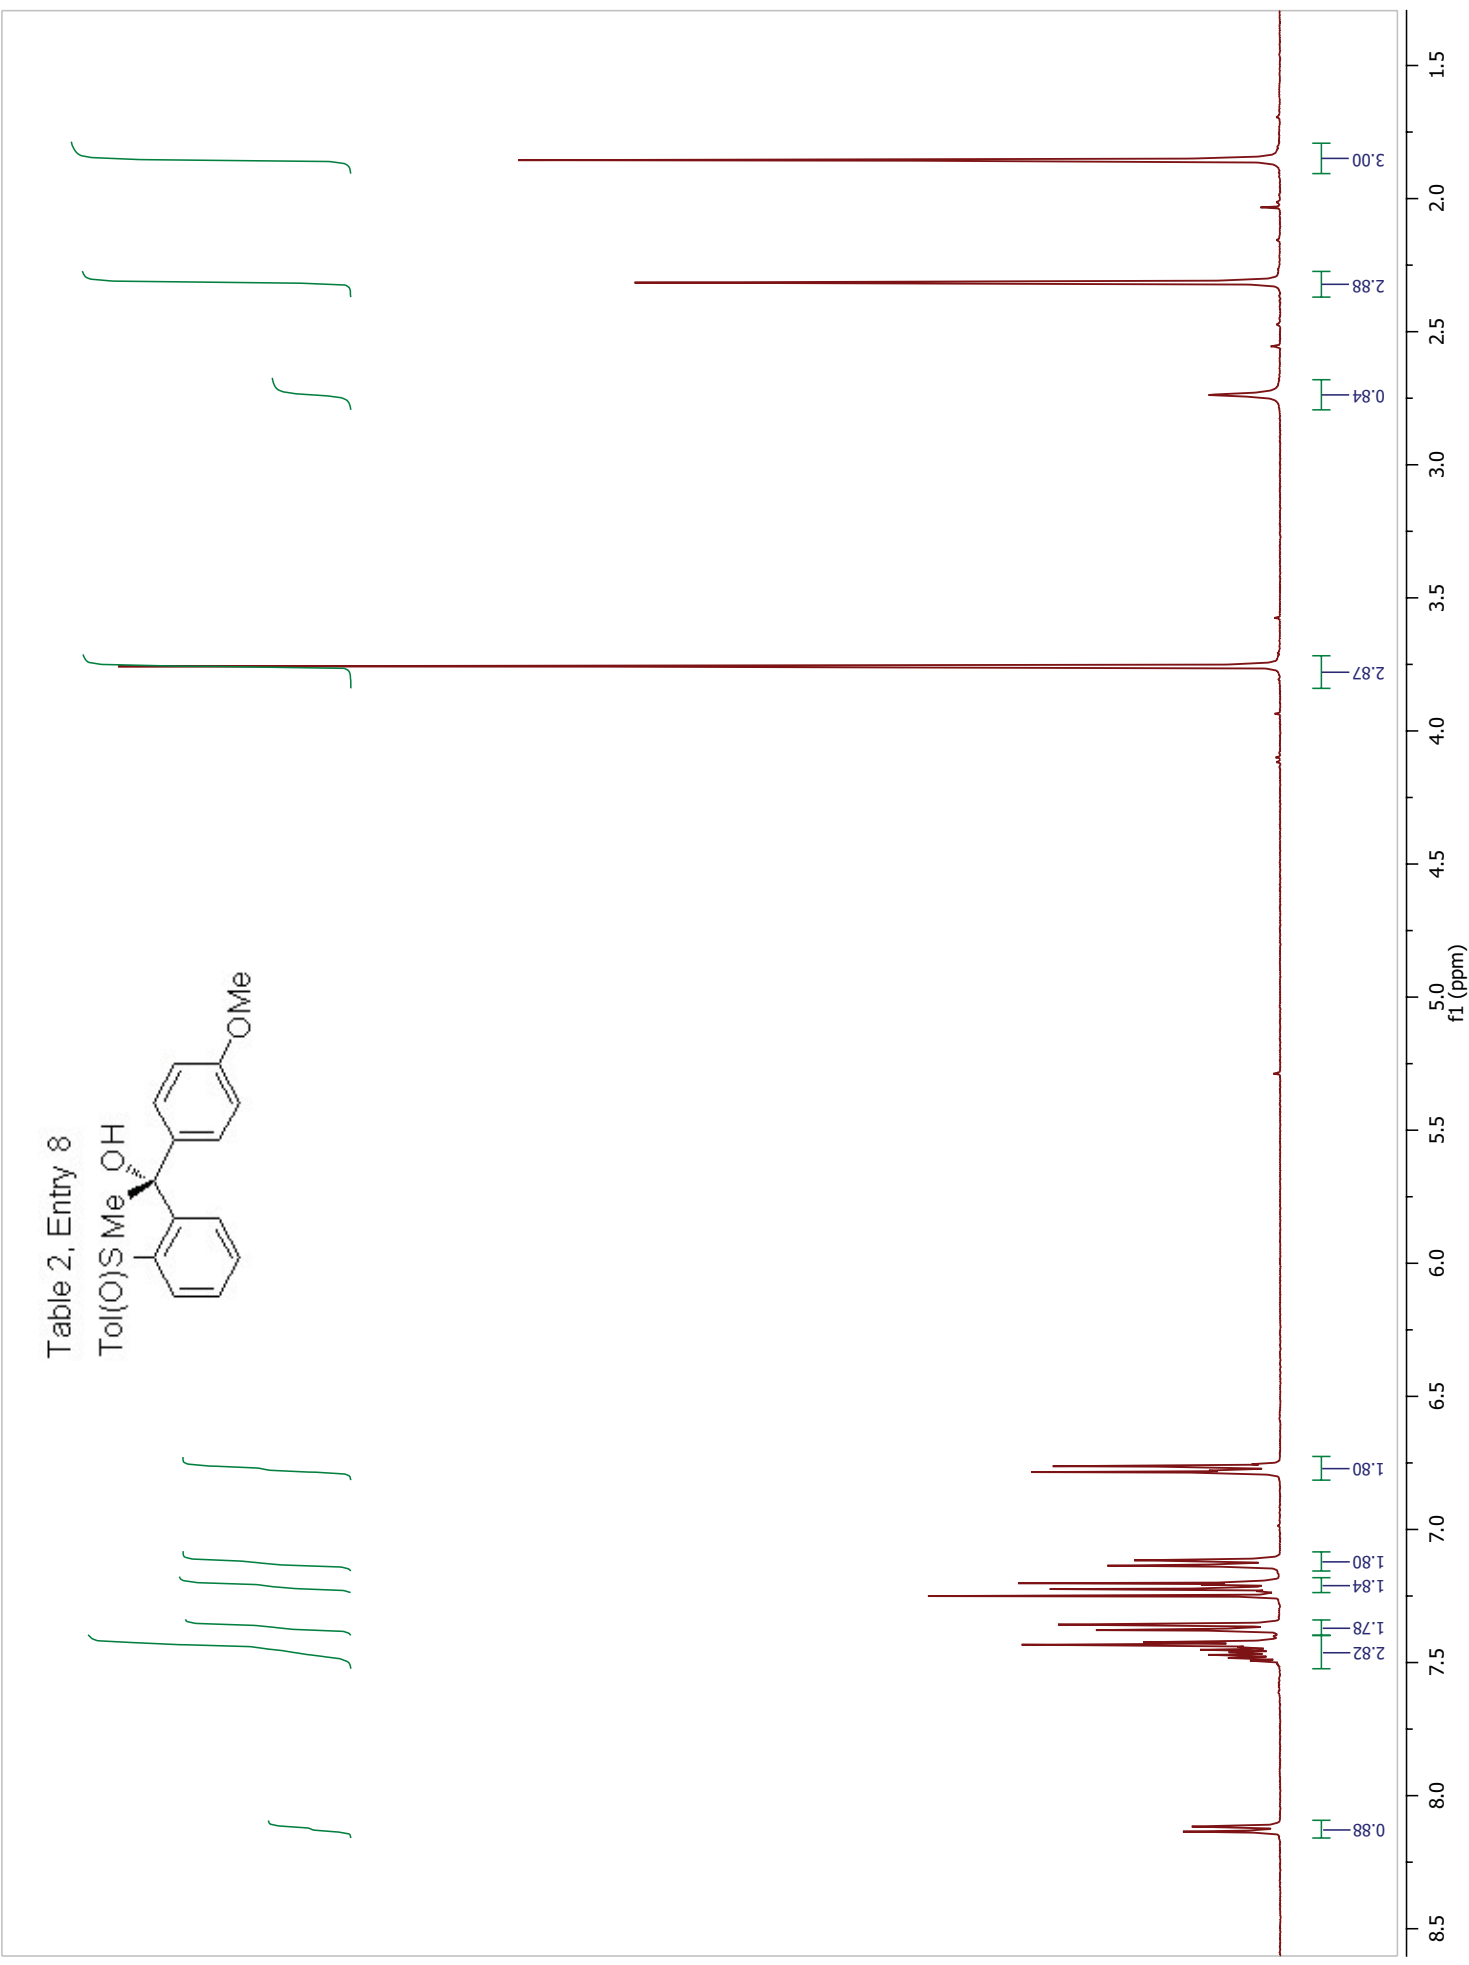

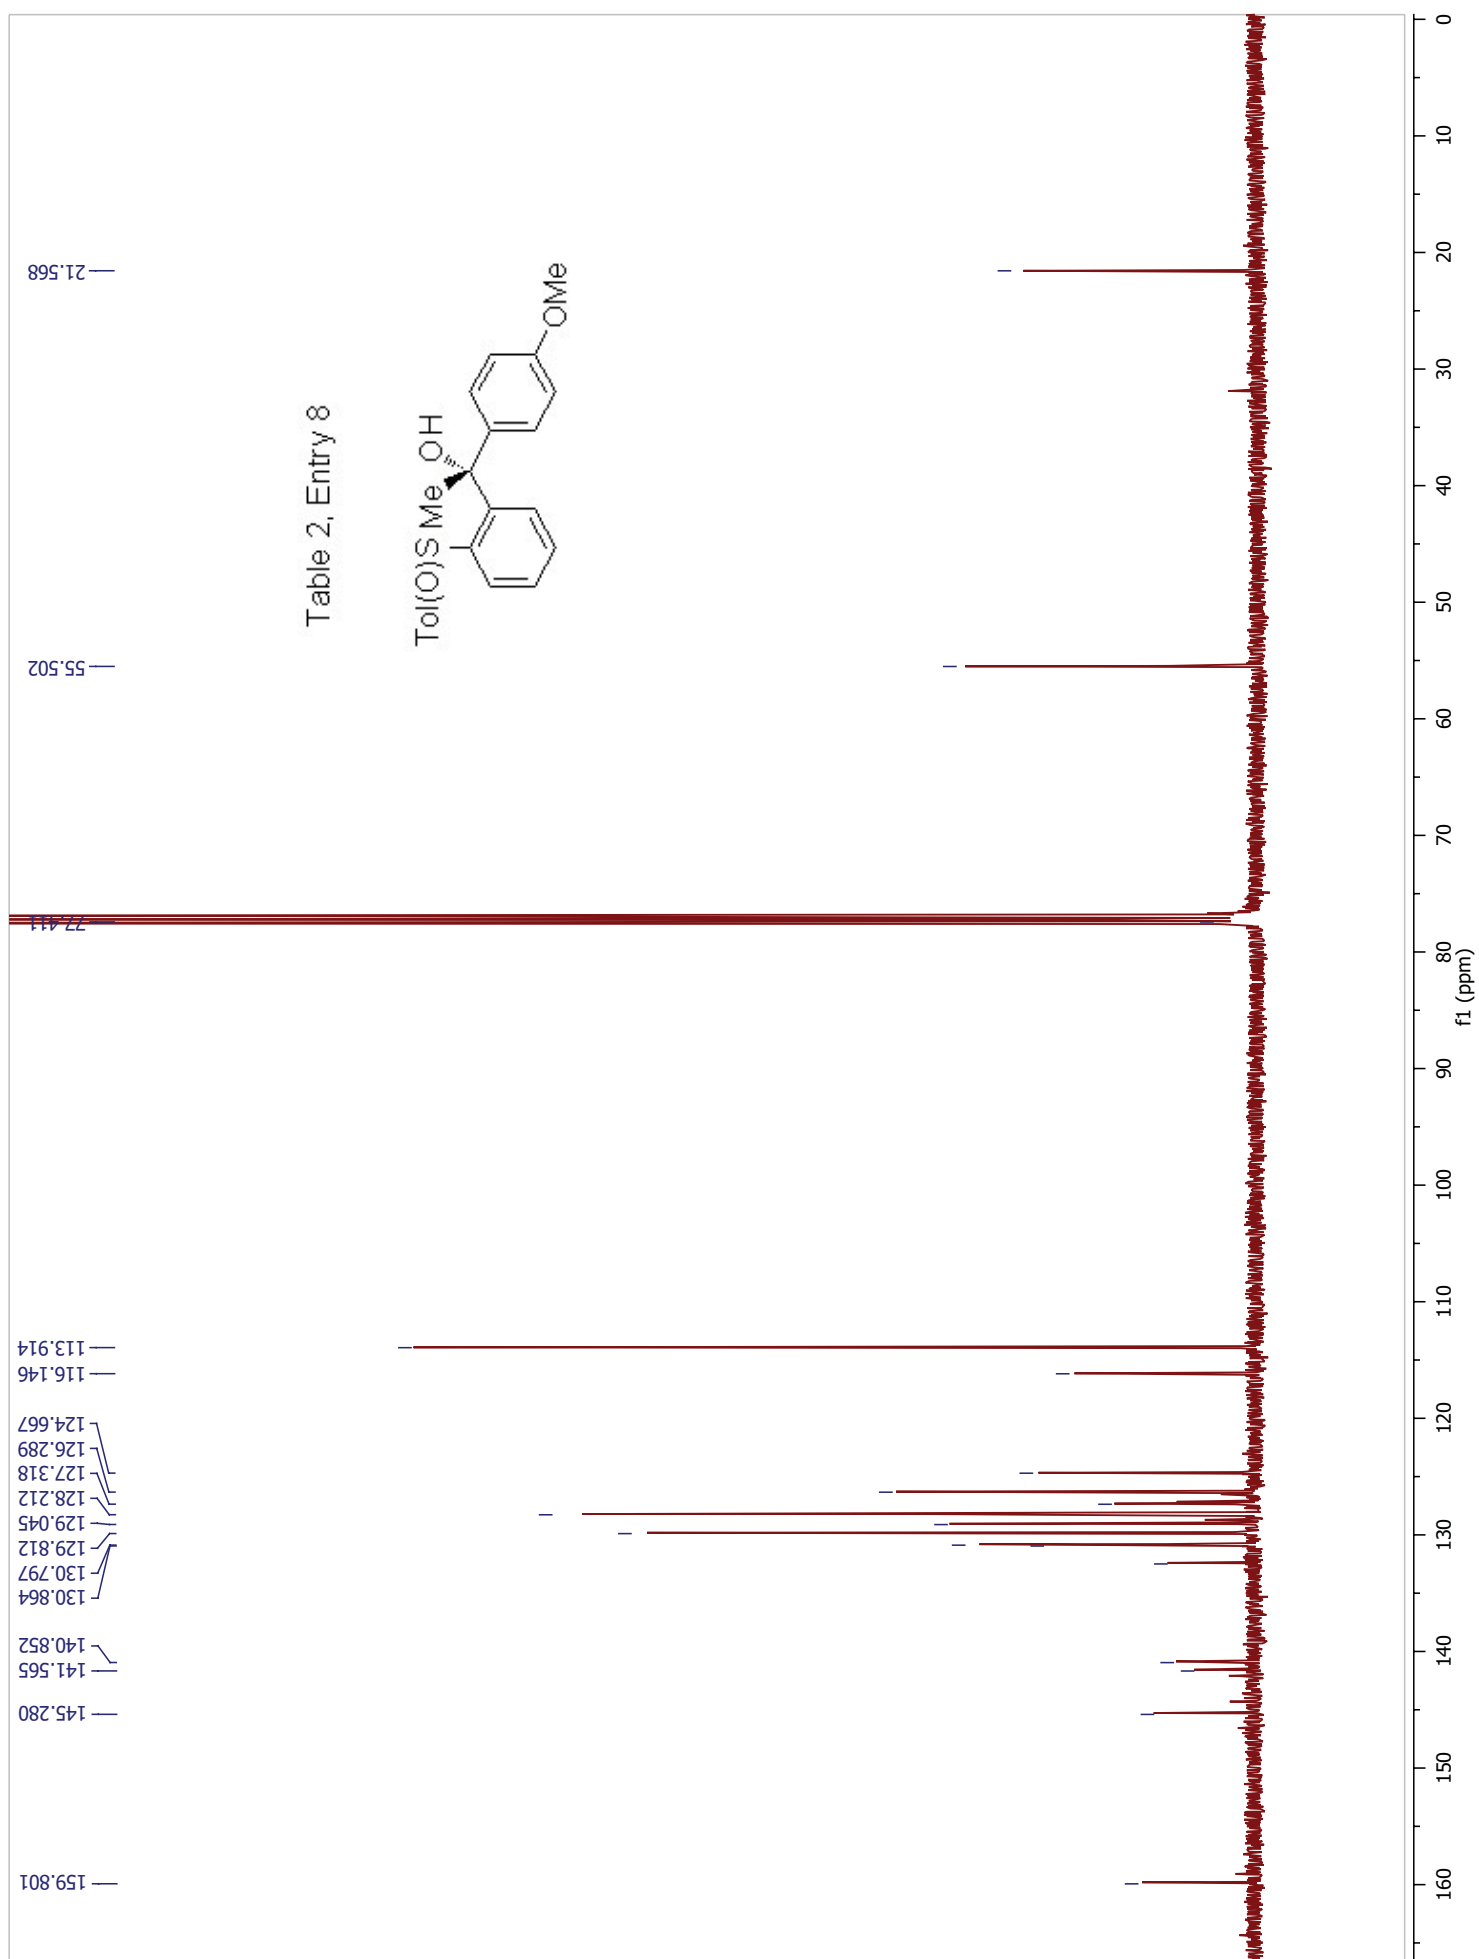

Table 2, Entry 9

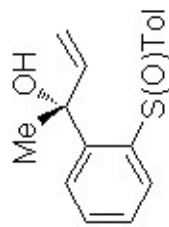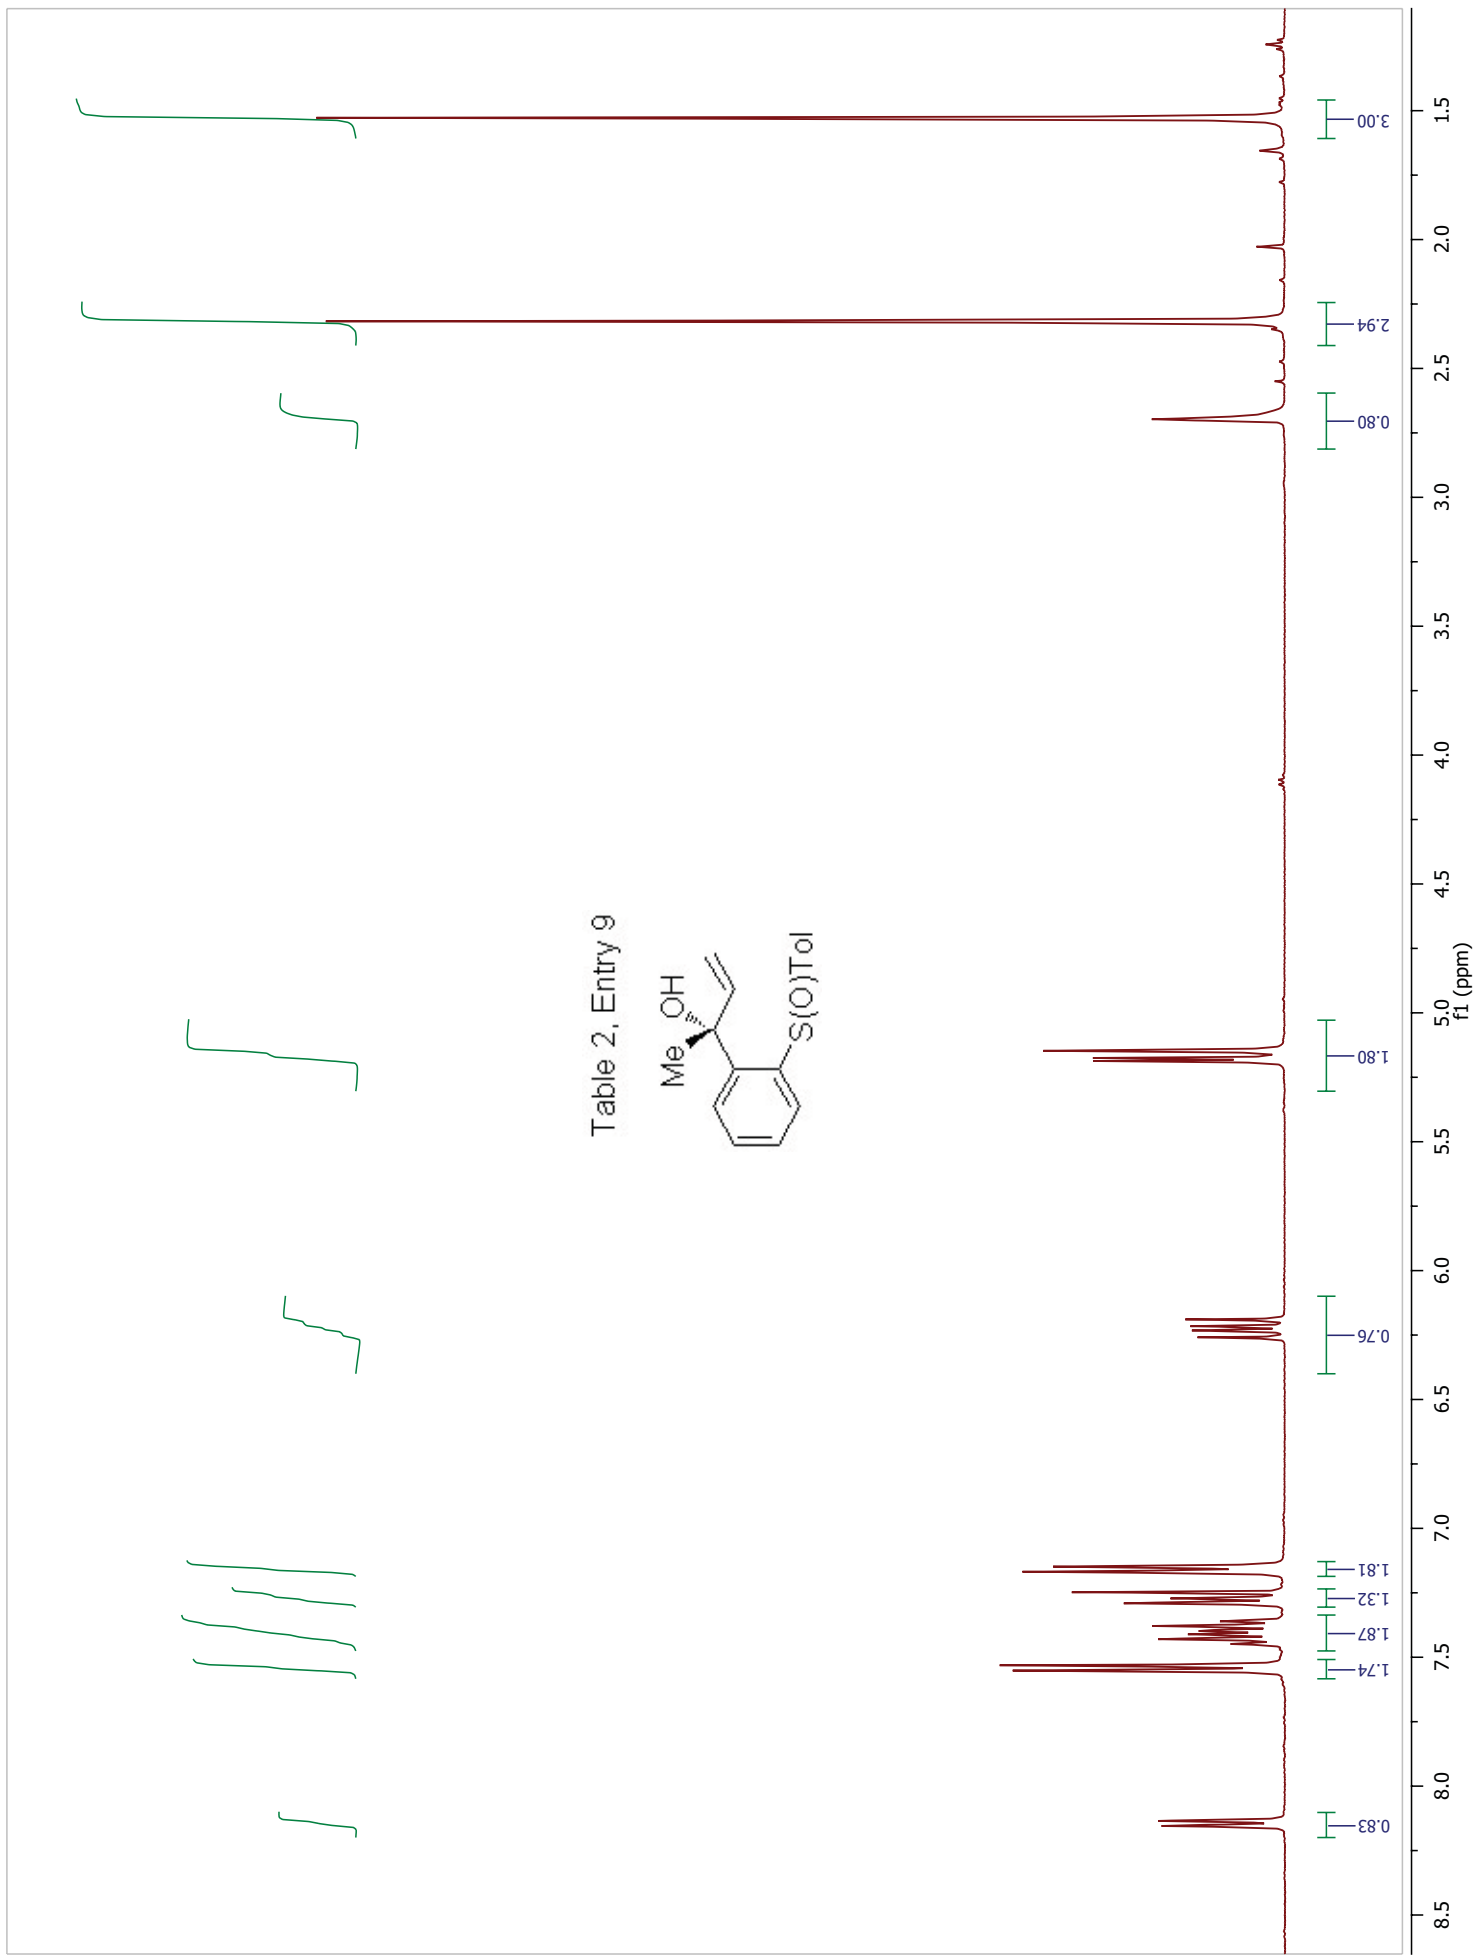



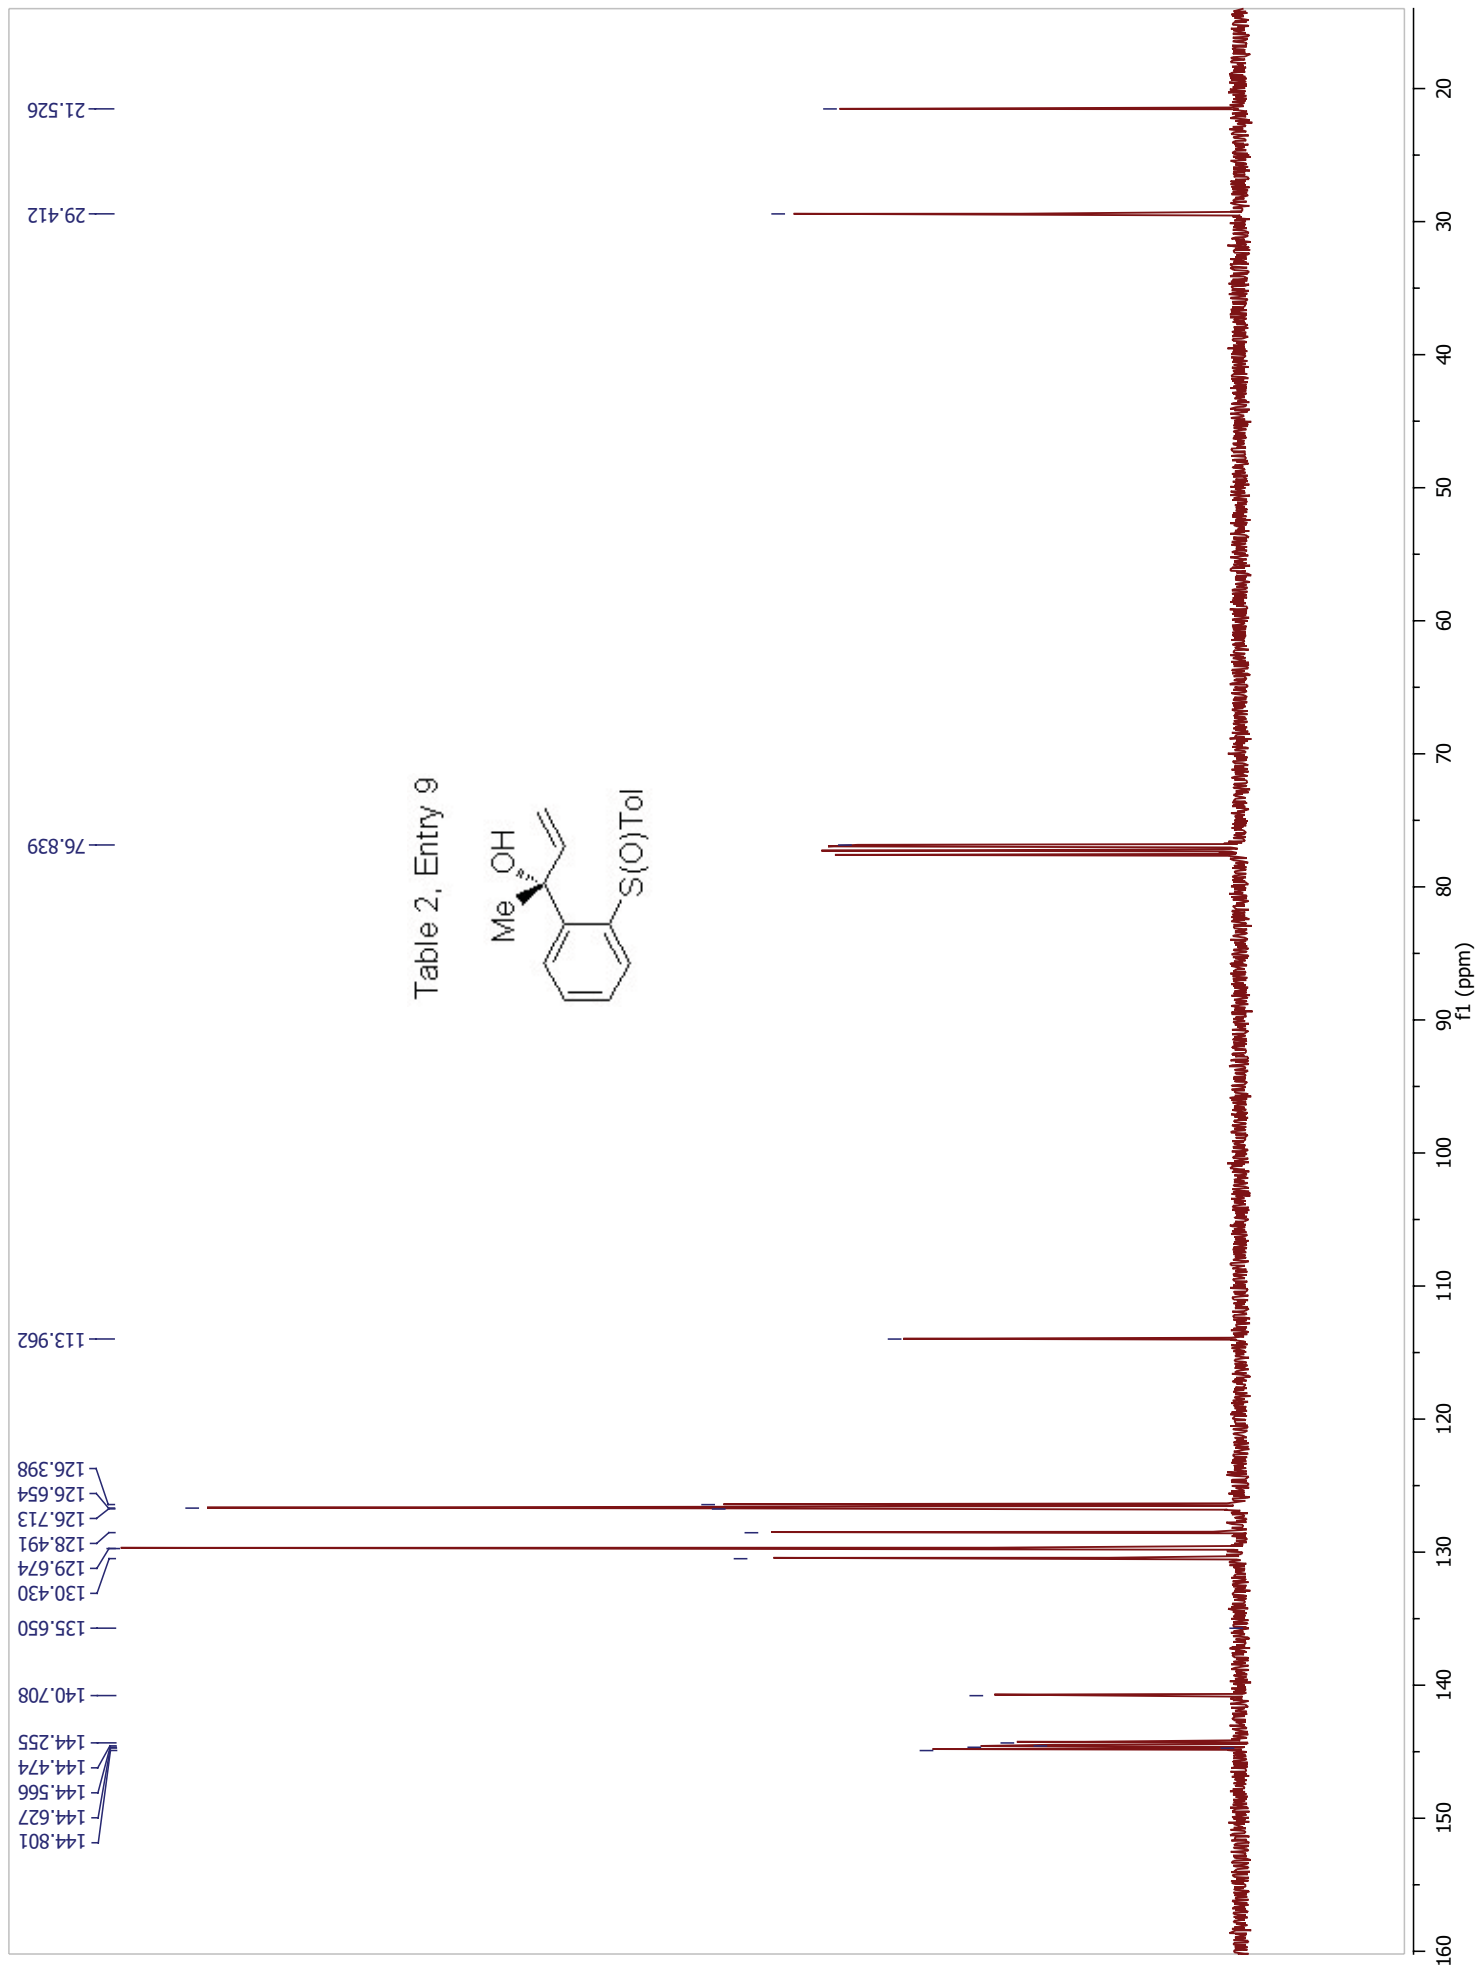

Table 2, Entry 10

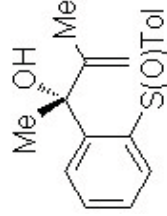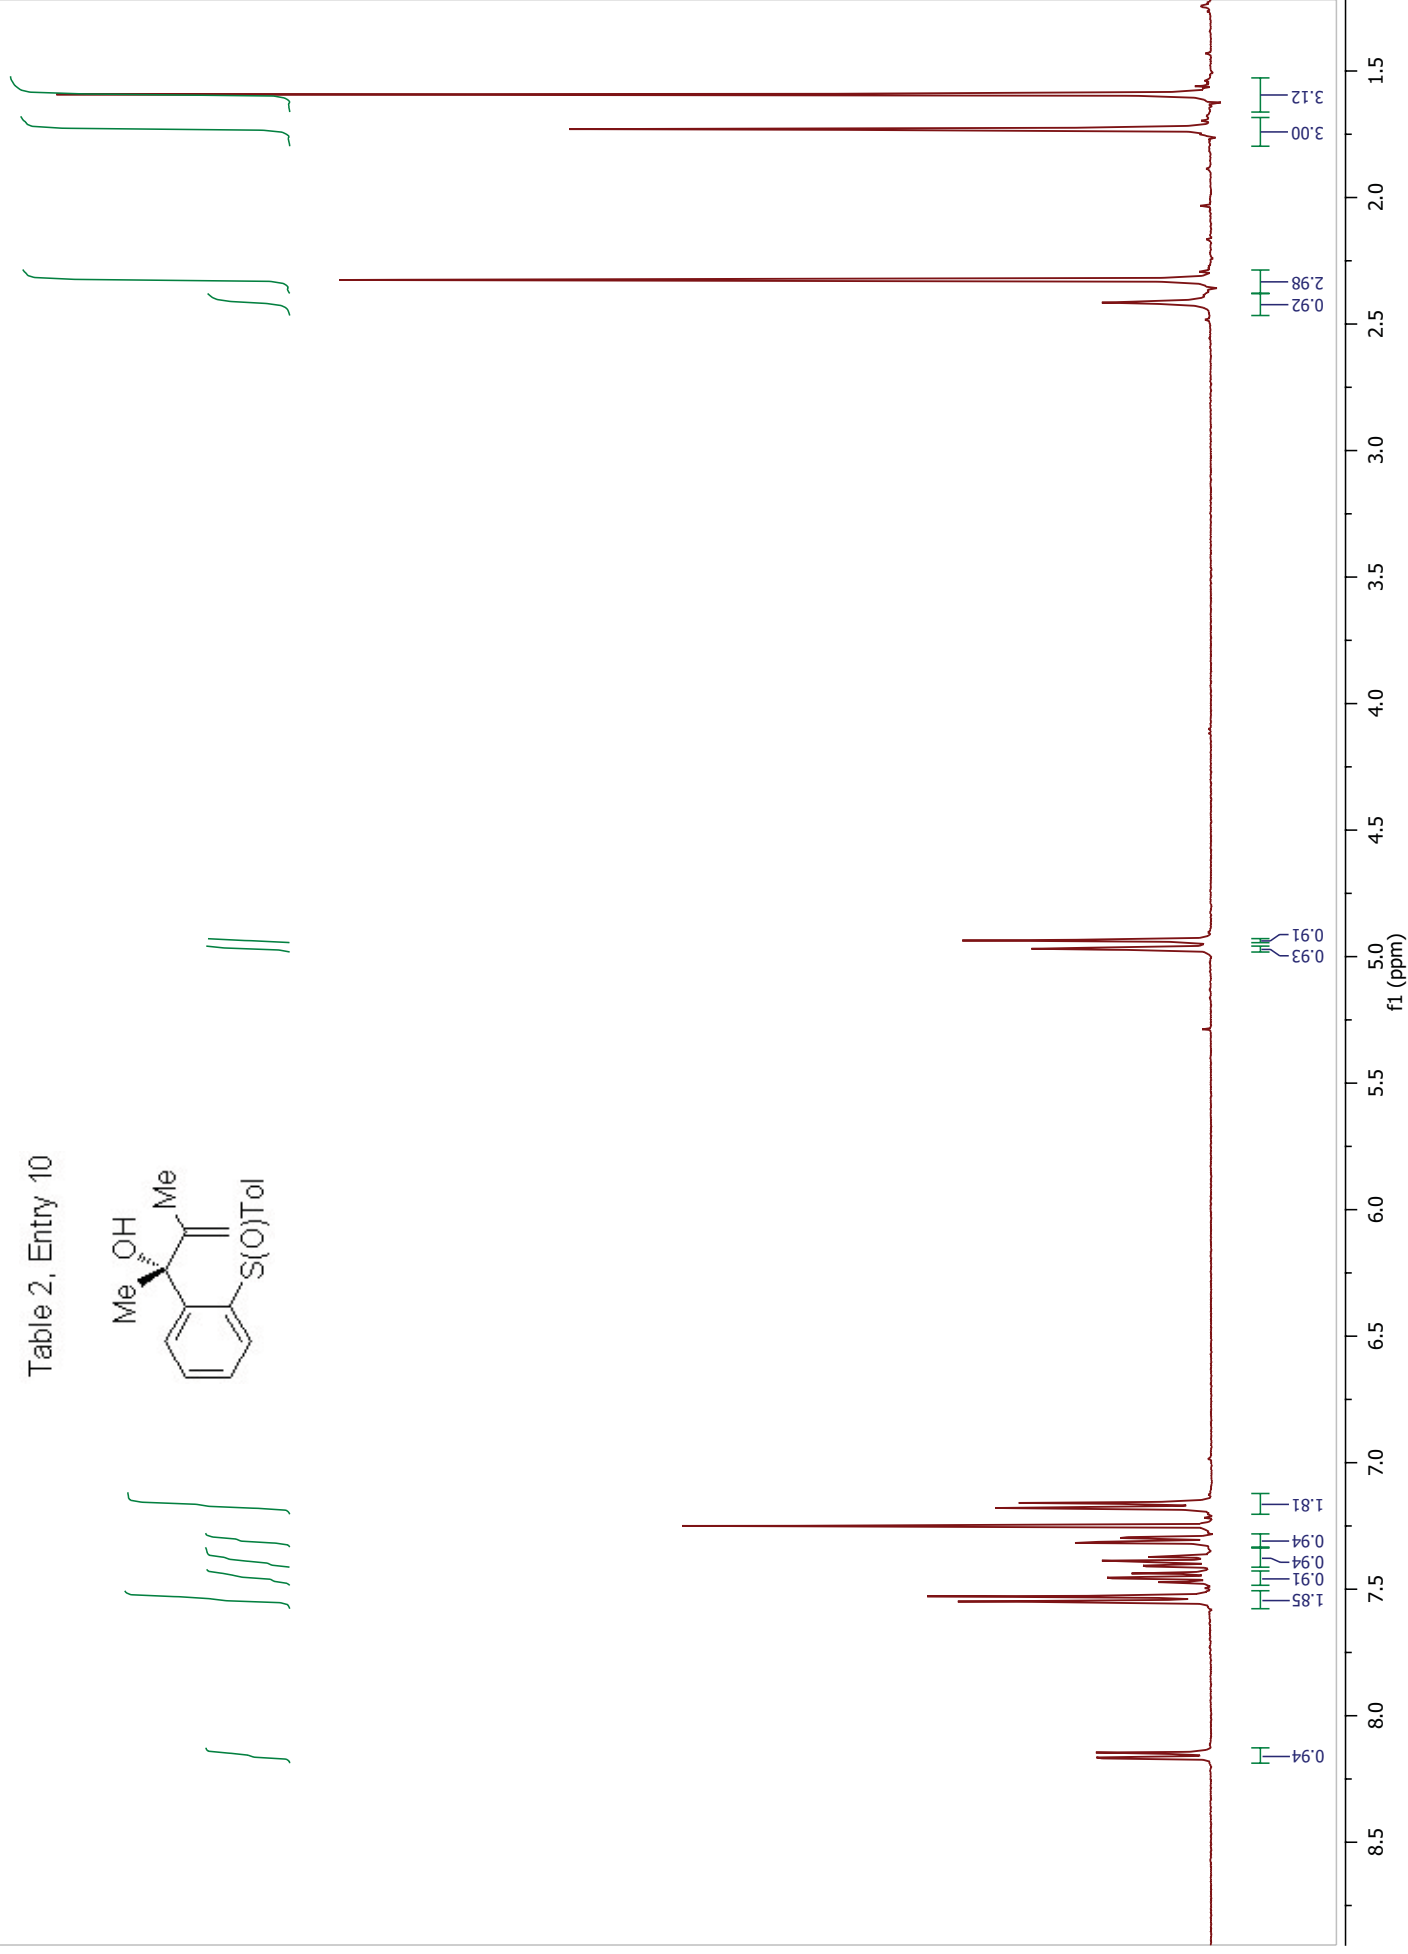

Table 2, Entry 10

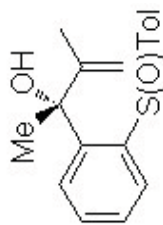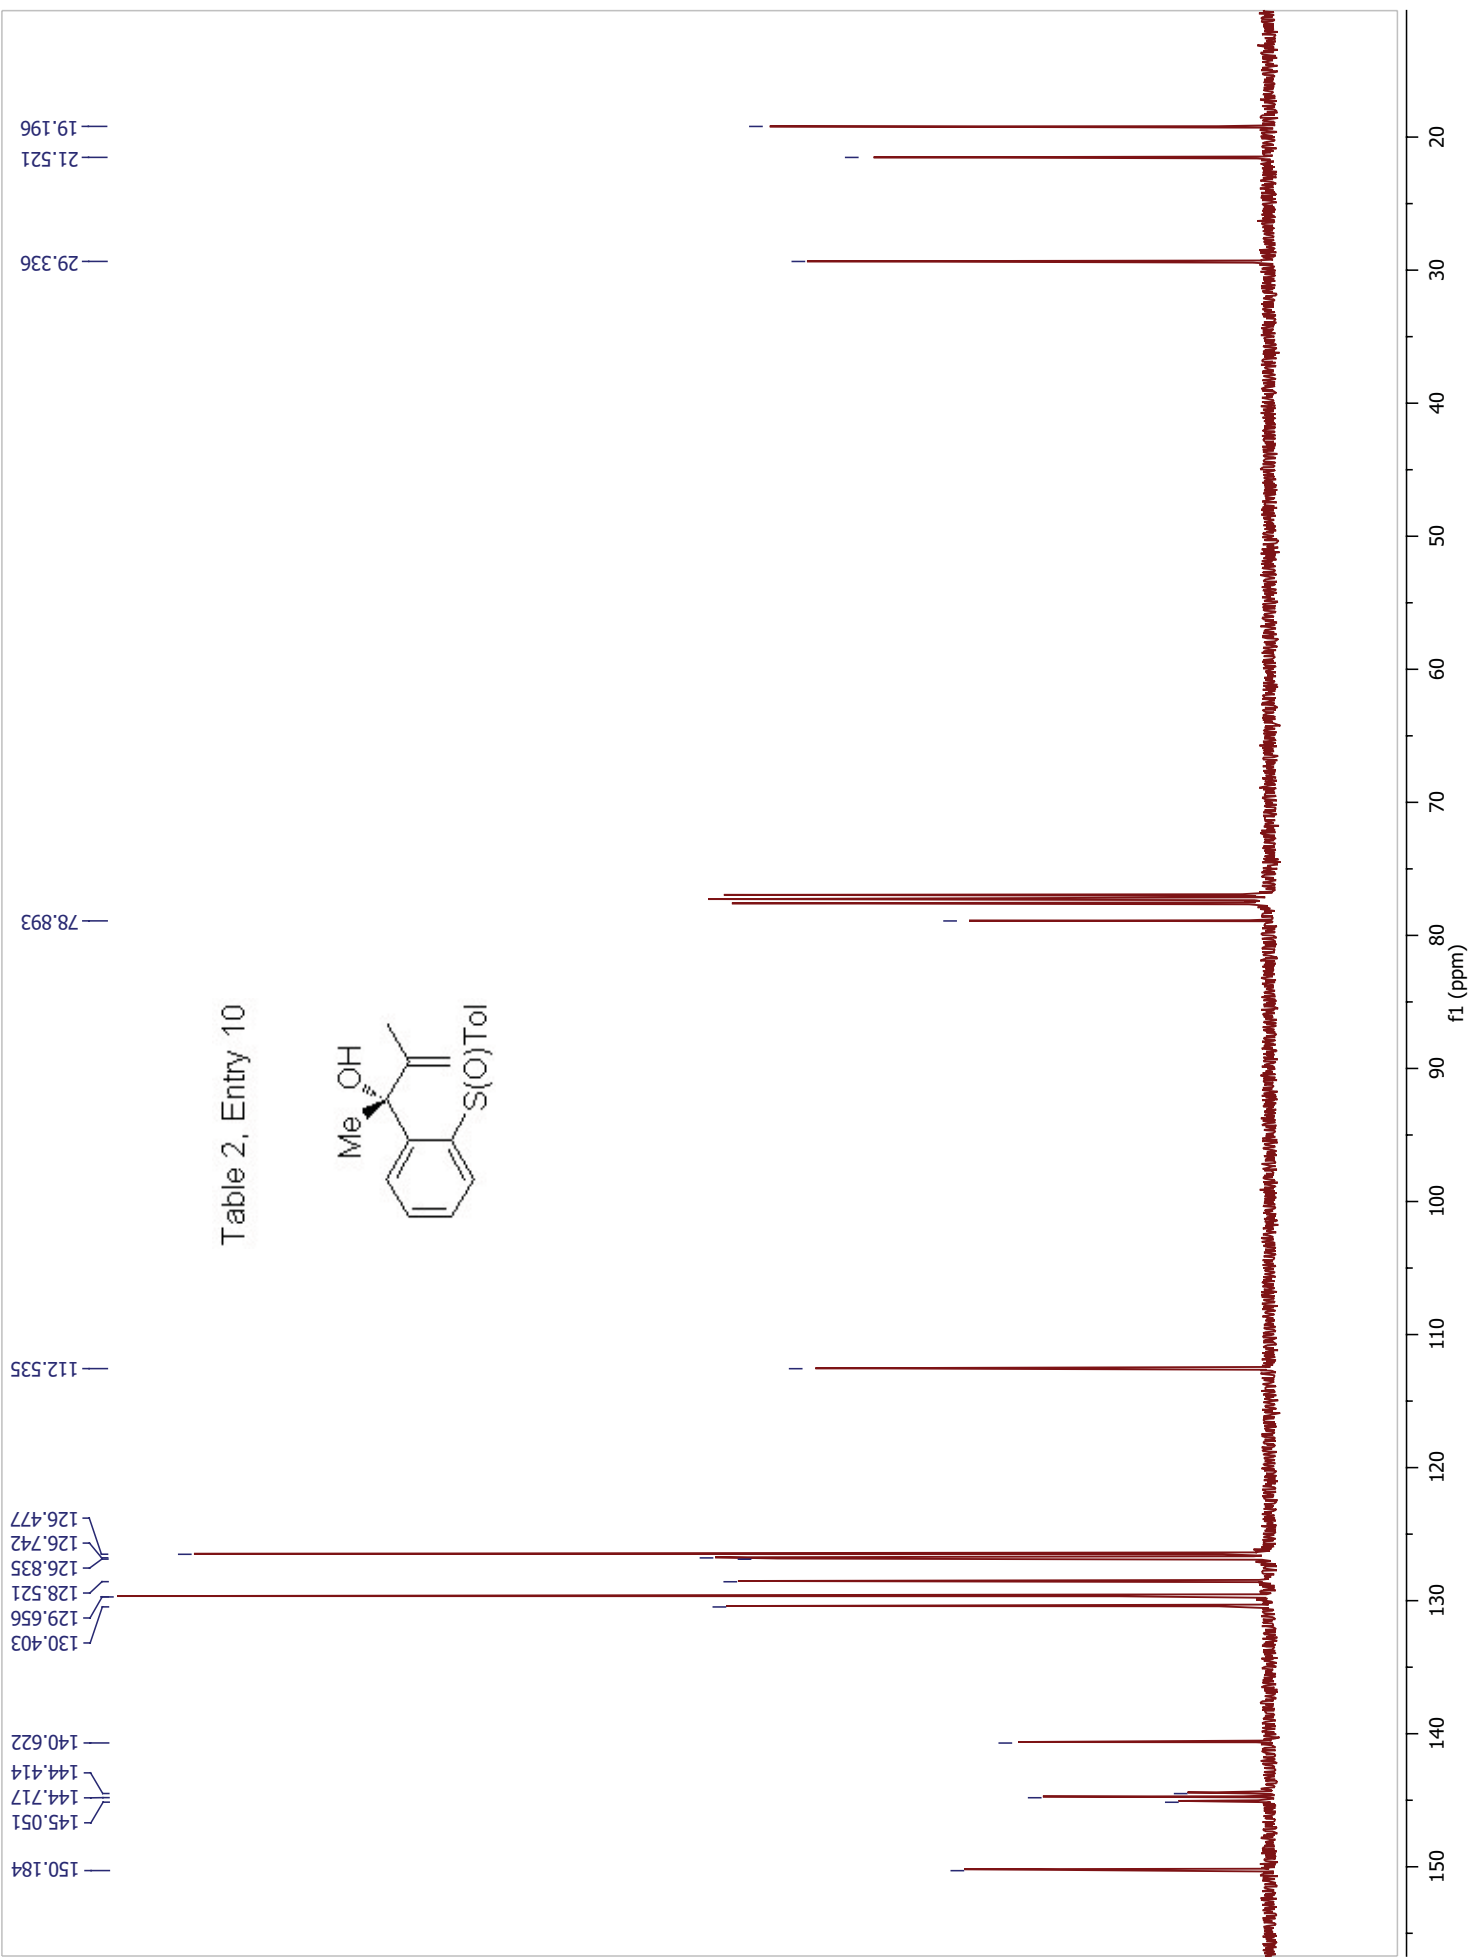

Table 2, Entry 11

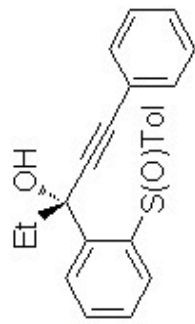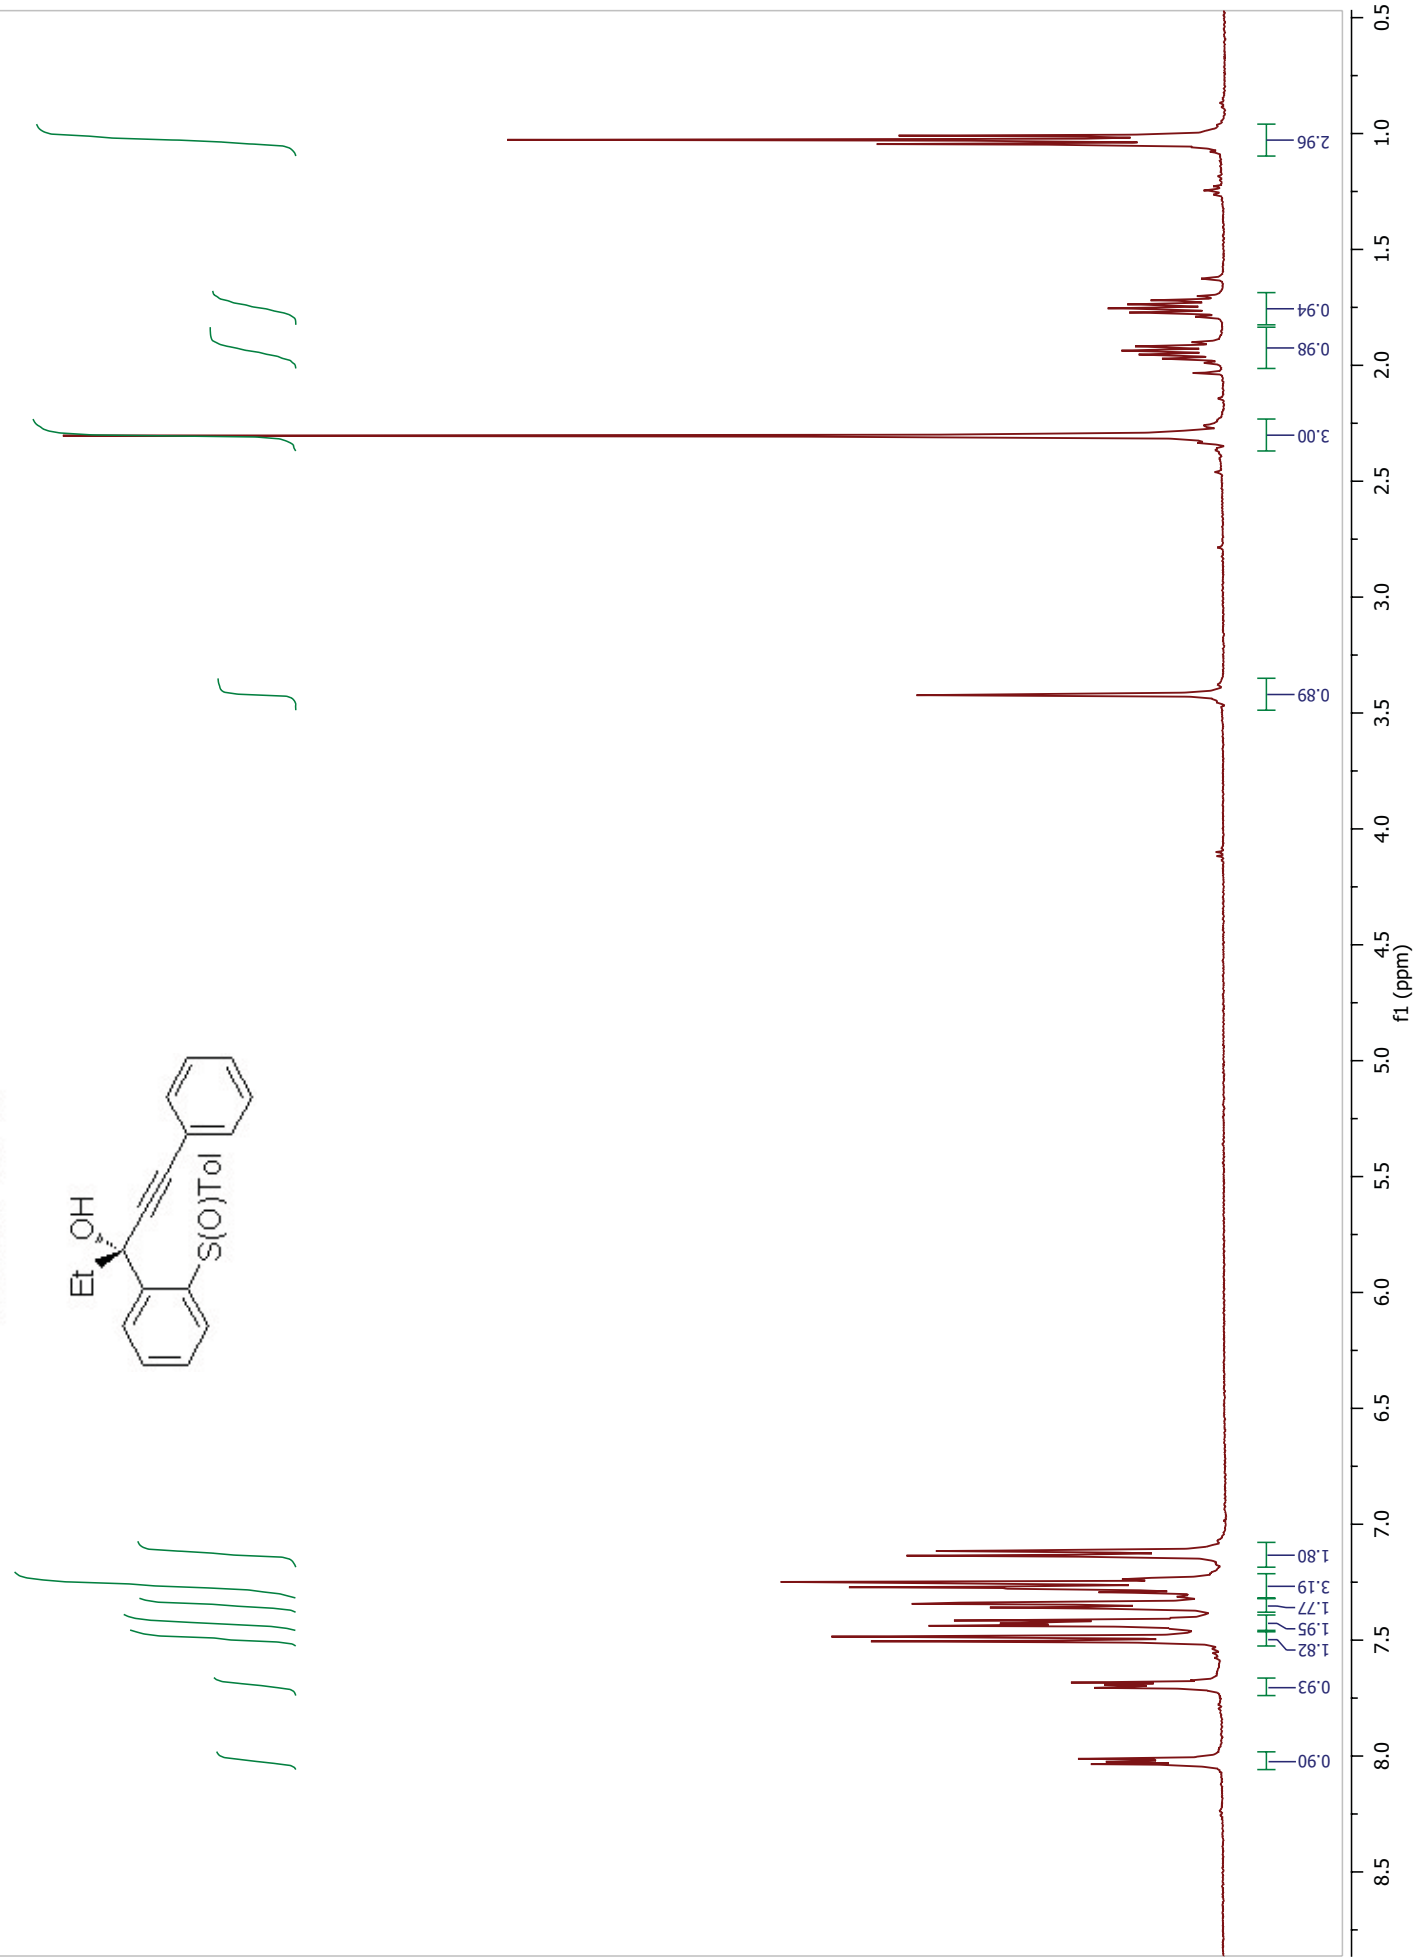

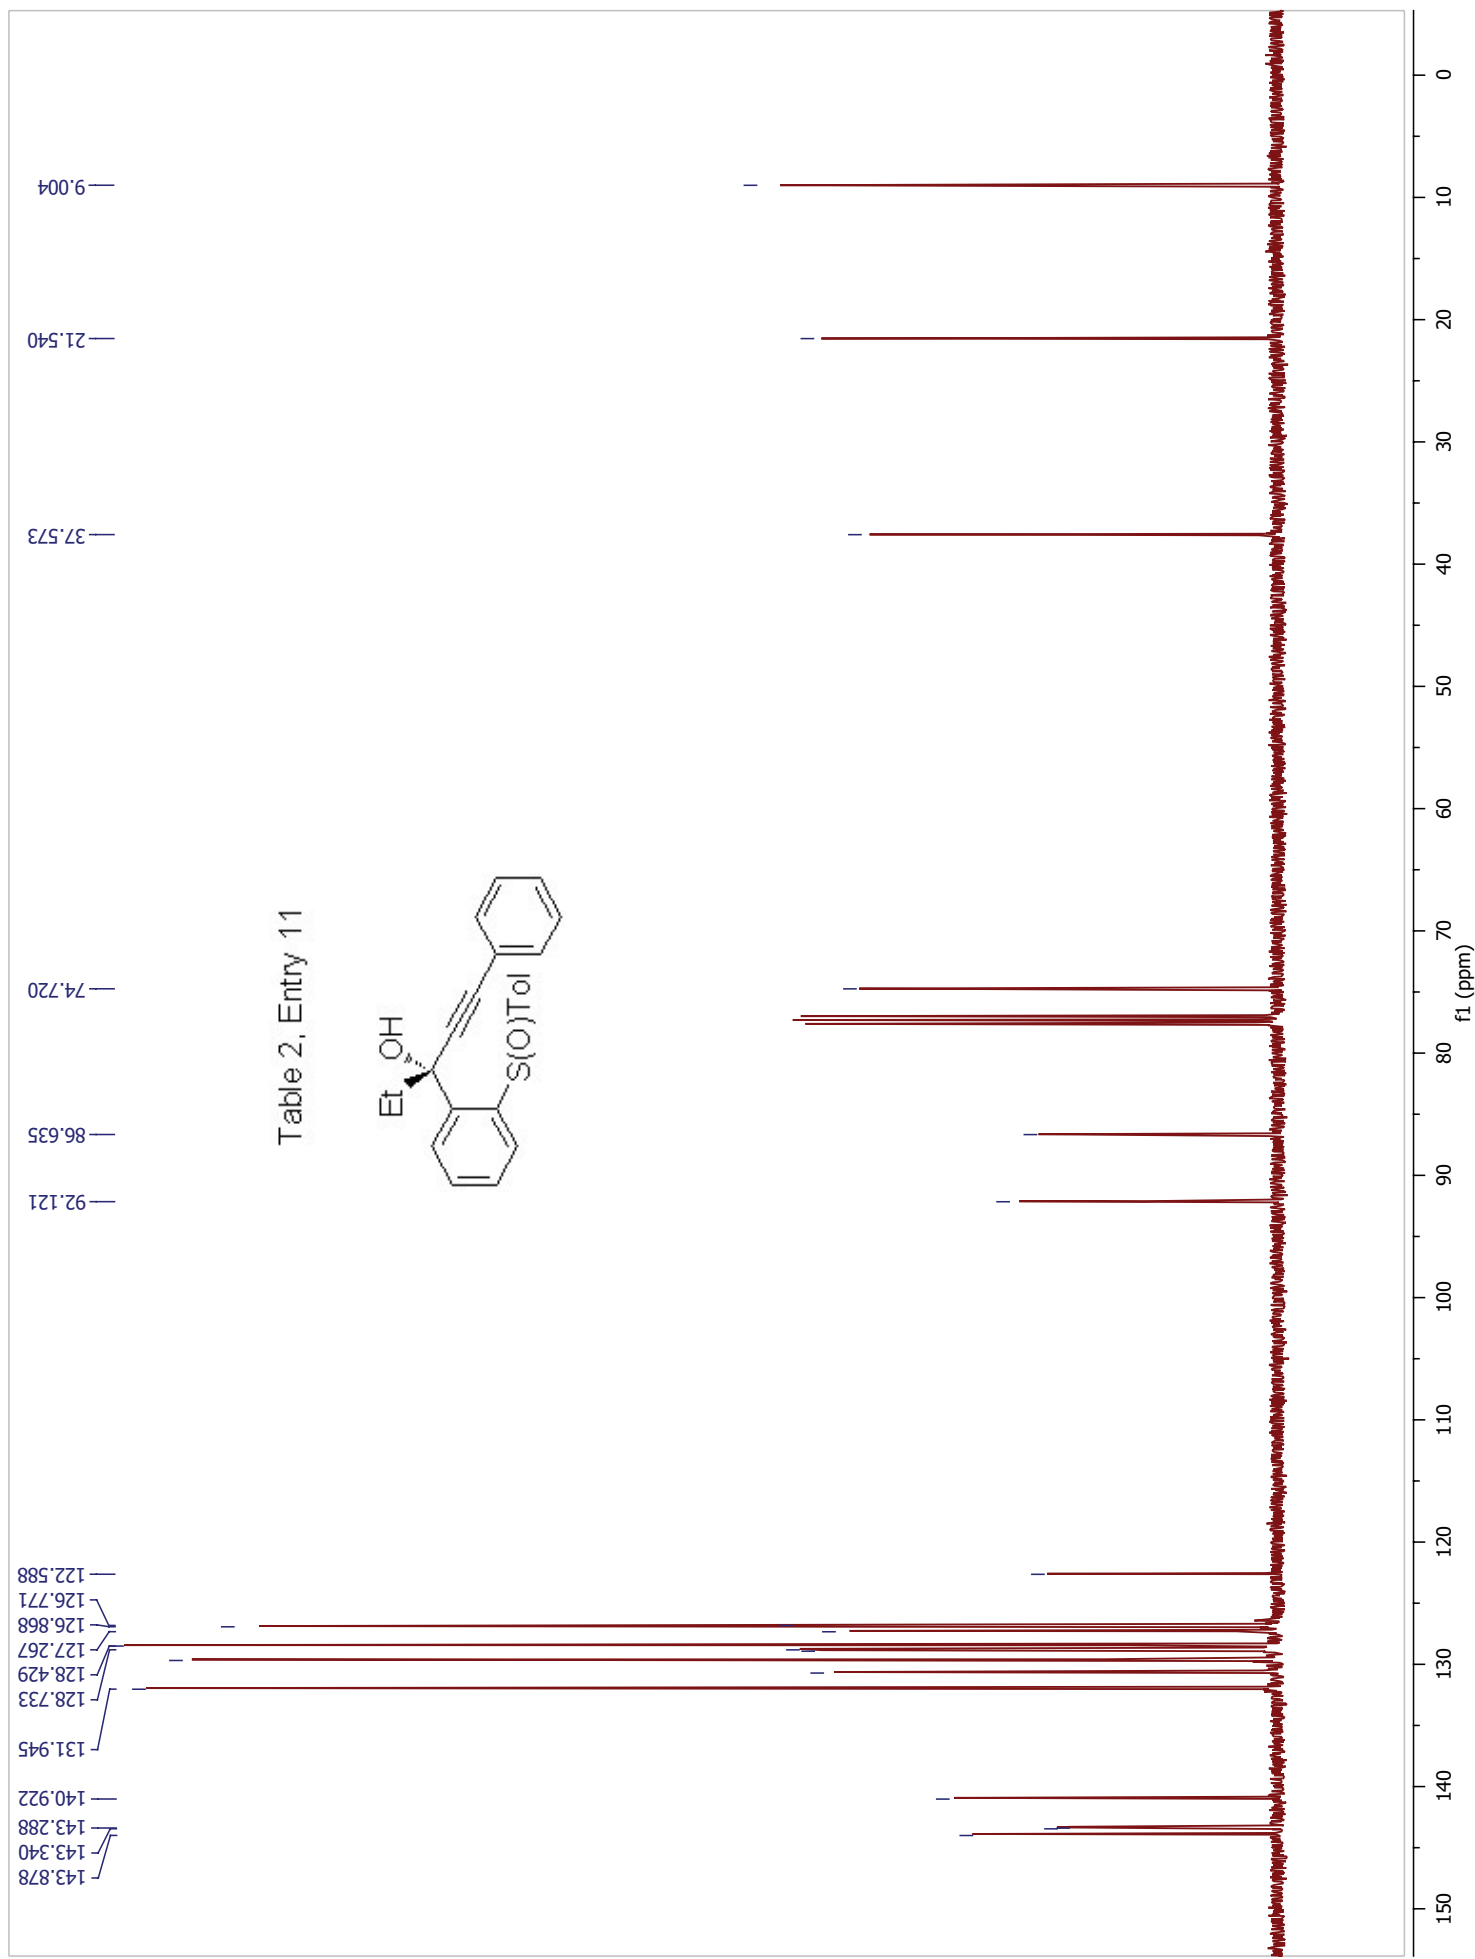

Table 2, Entry 12

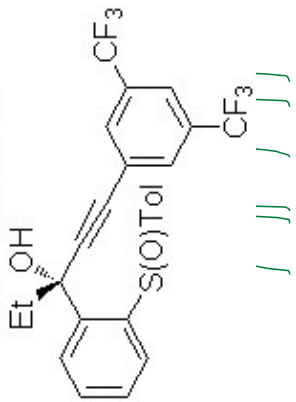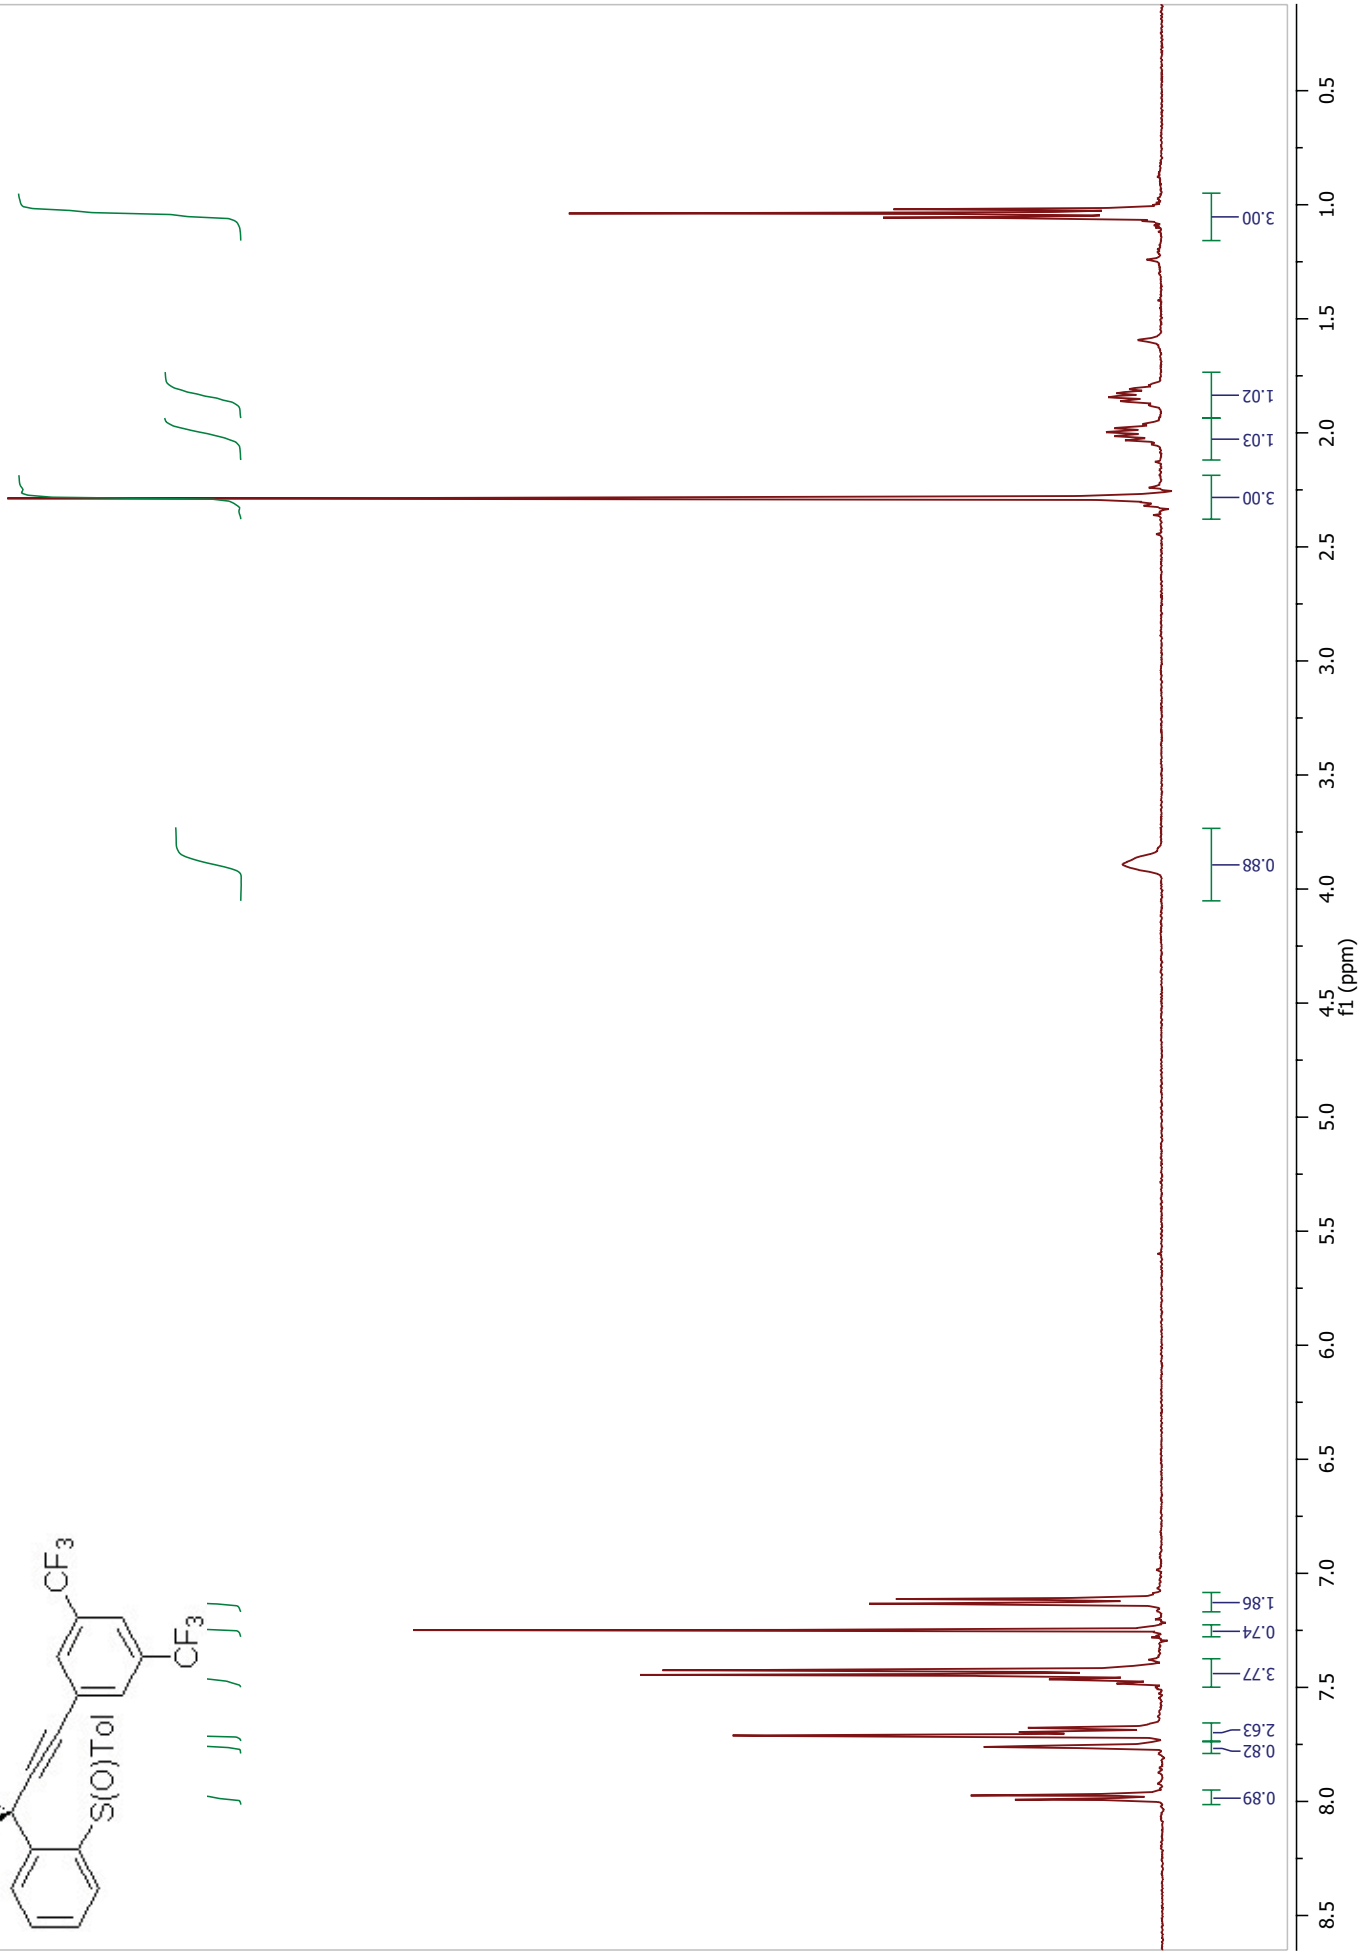

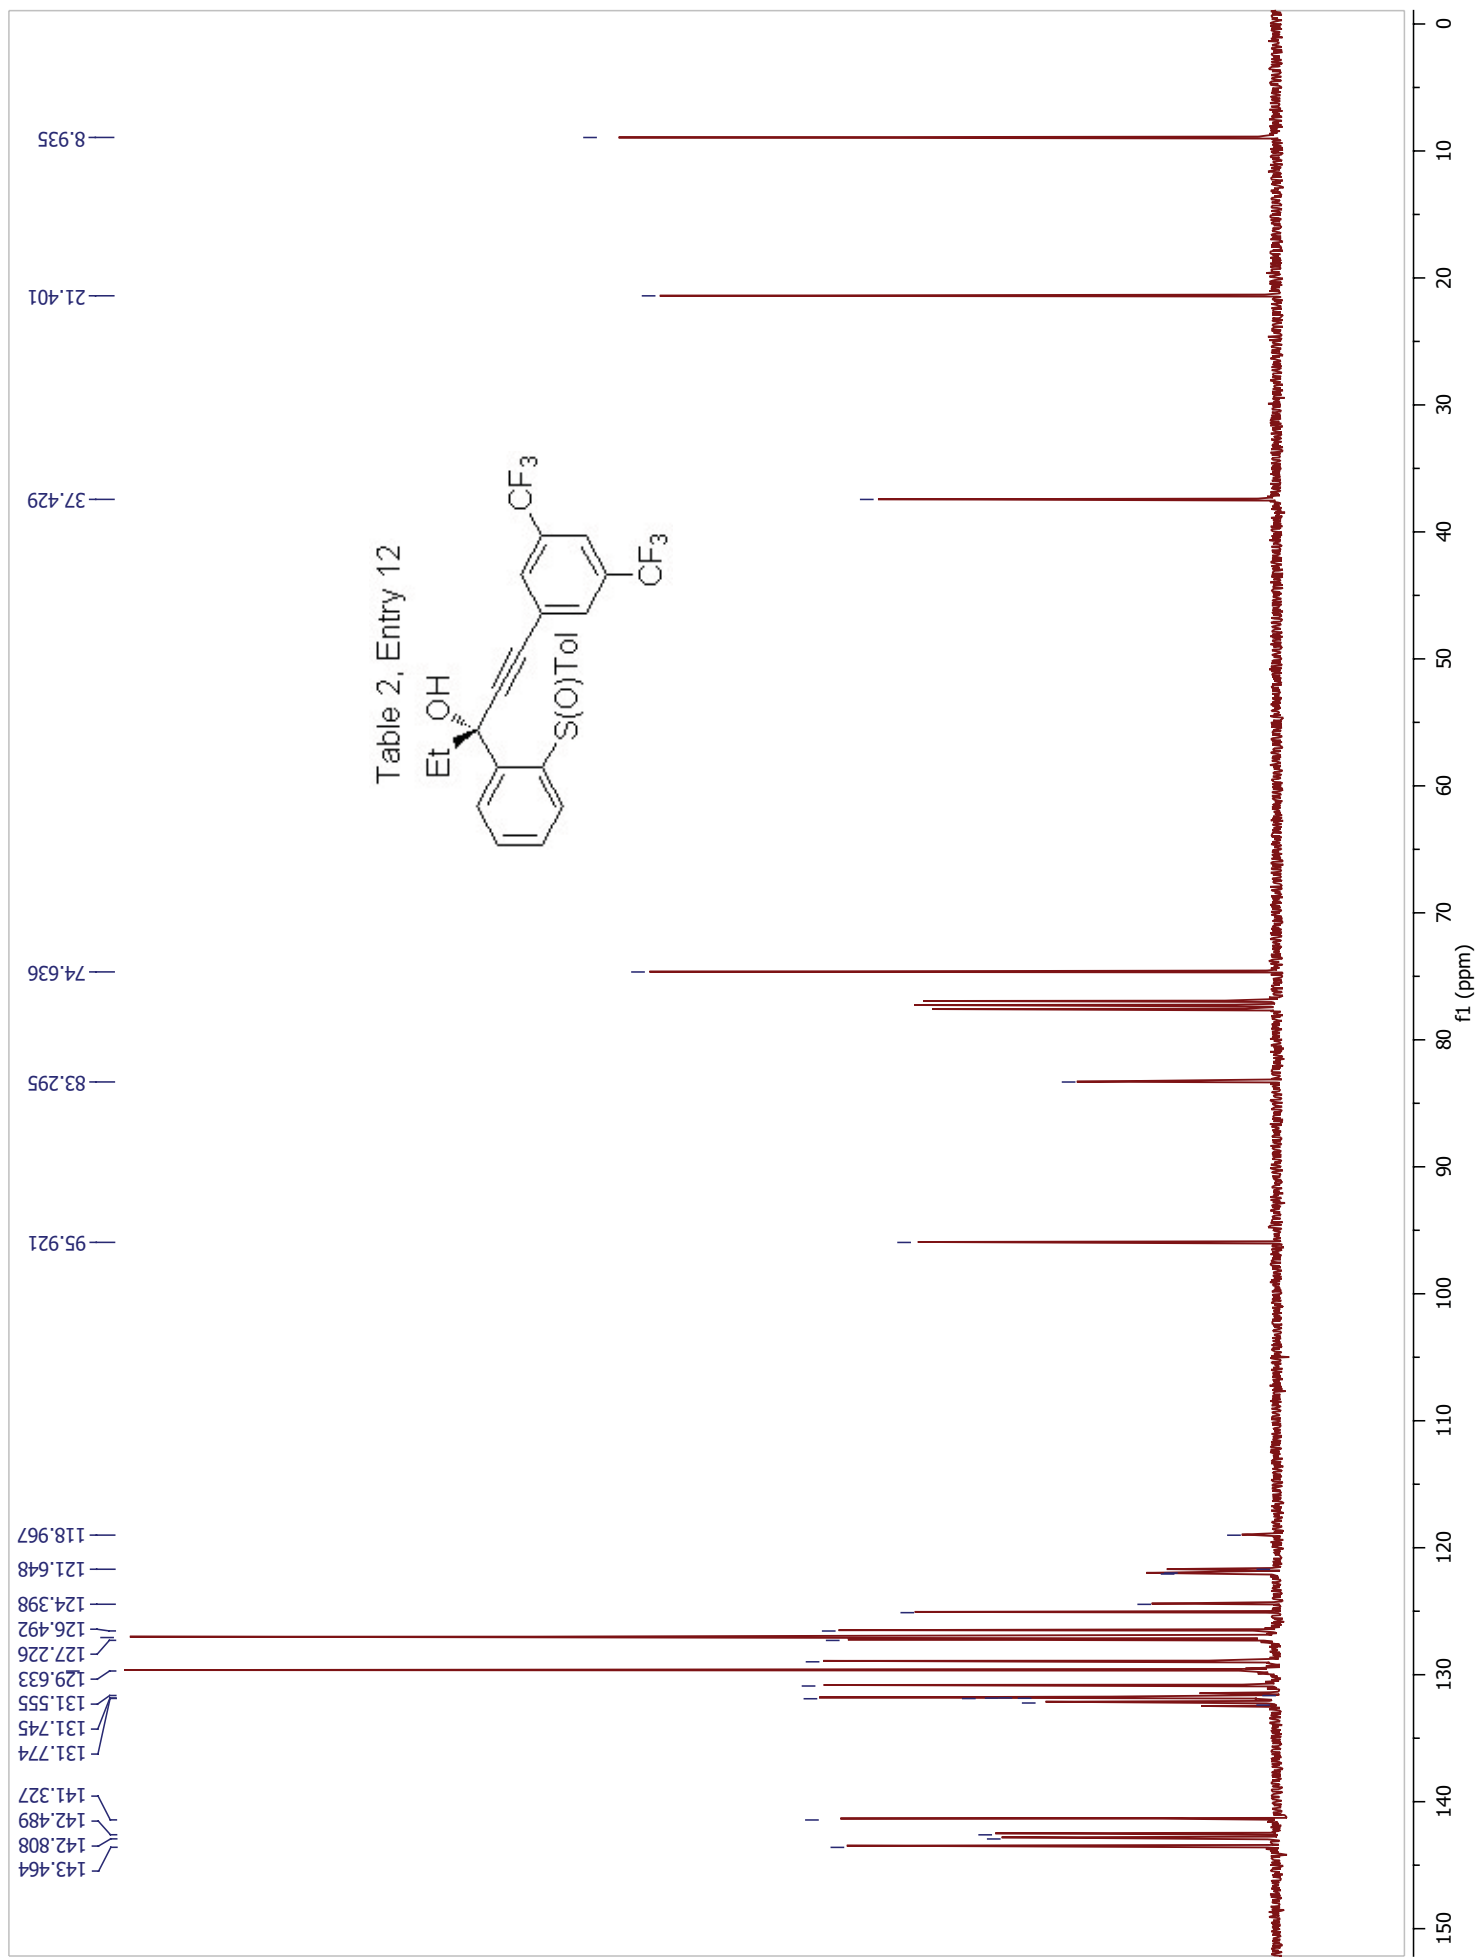

Table 2, Entry 13

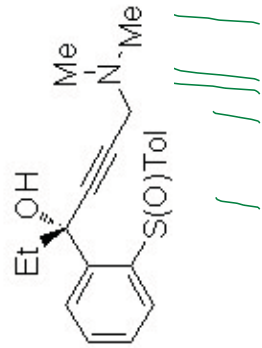

0.29  
0.31  
0.67  
0.61  
0.59

1.06  
1.87  
0.35  
0.35  
1.00

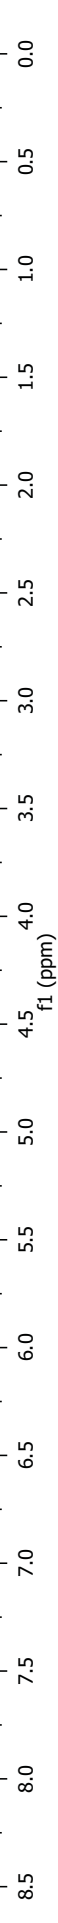



Table 2, Entry 13

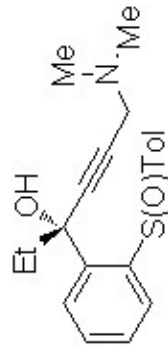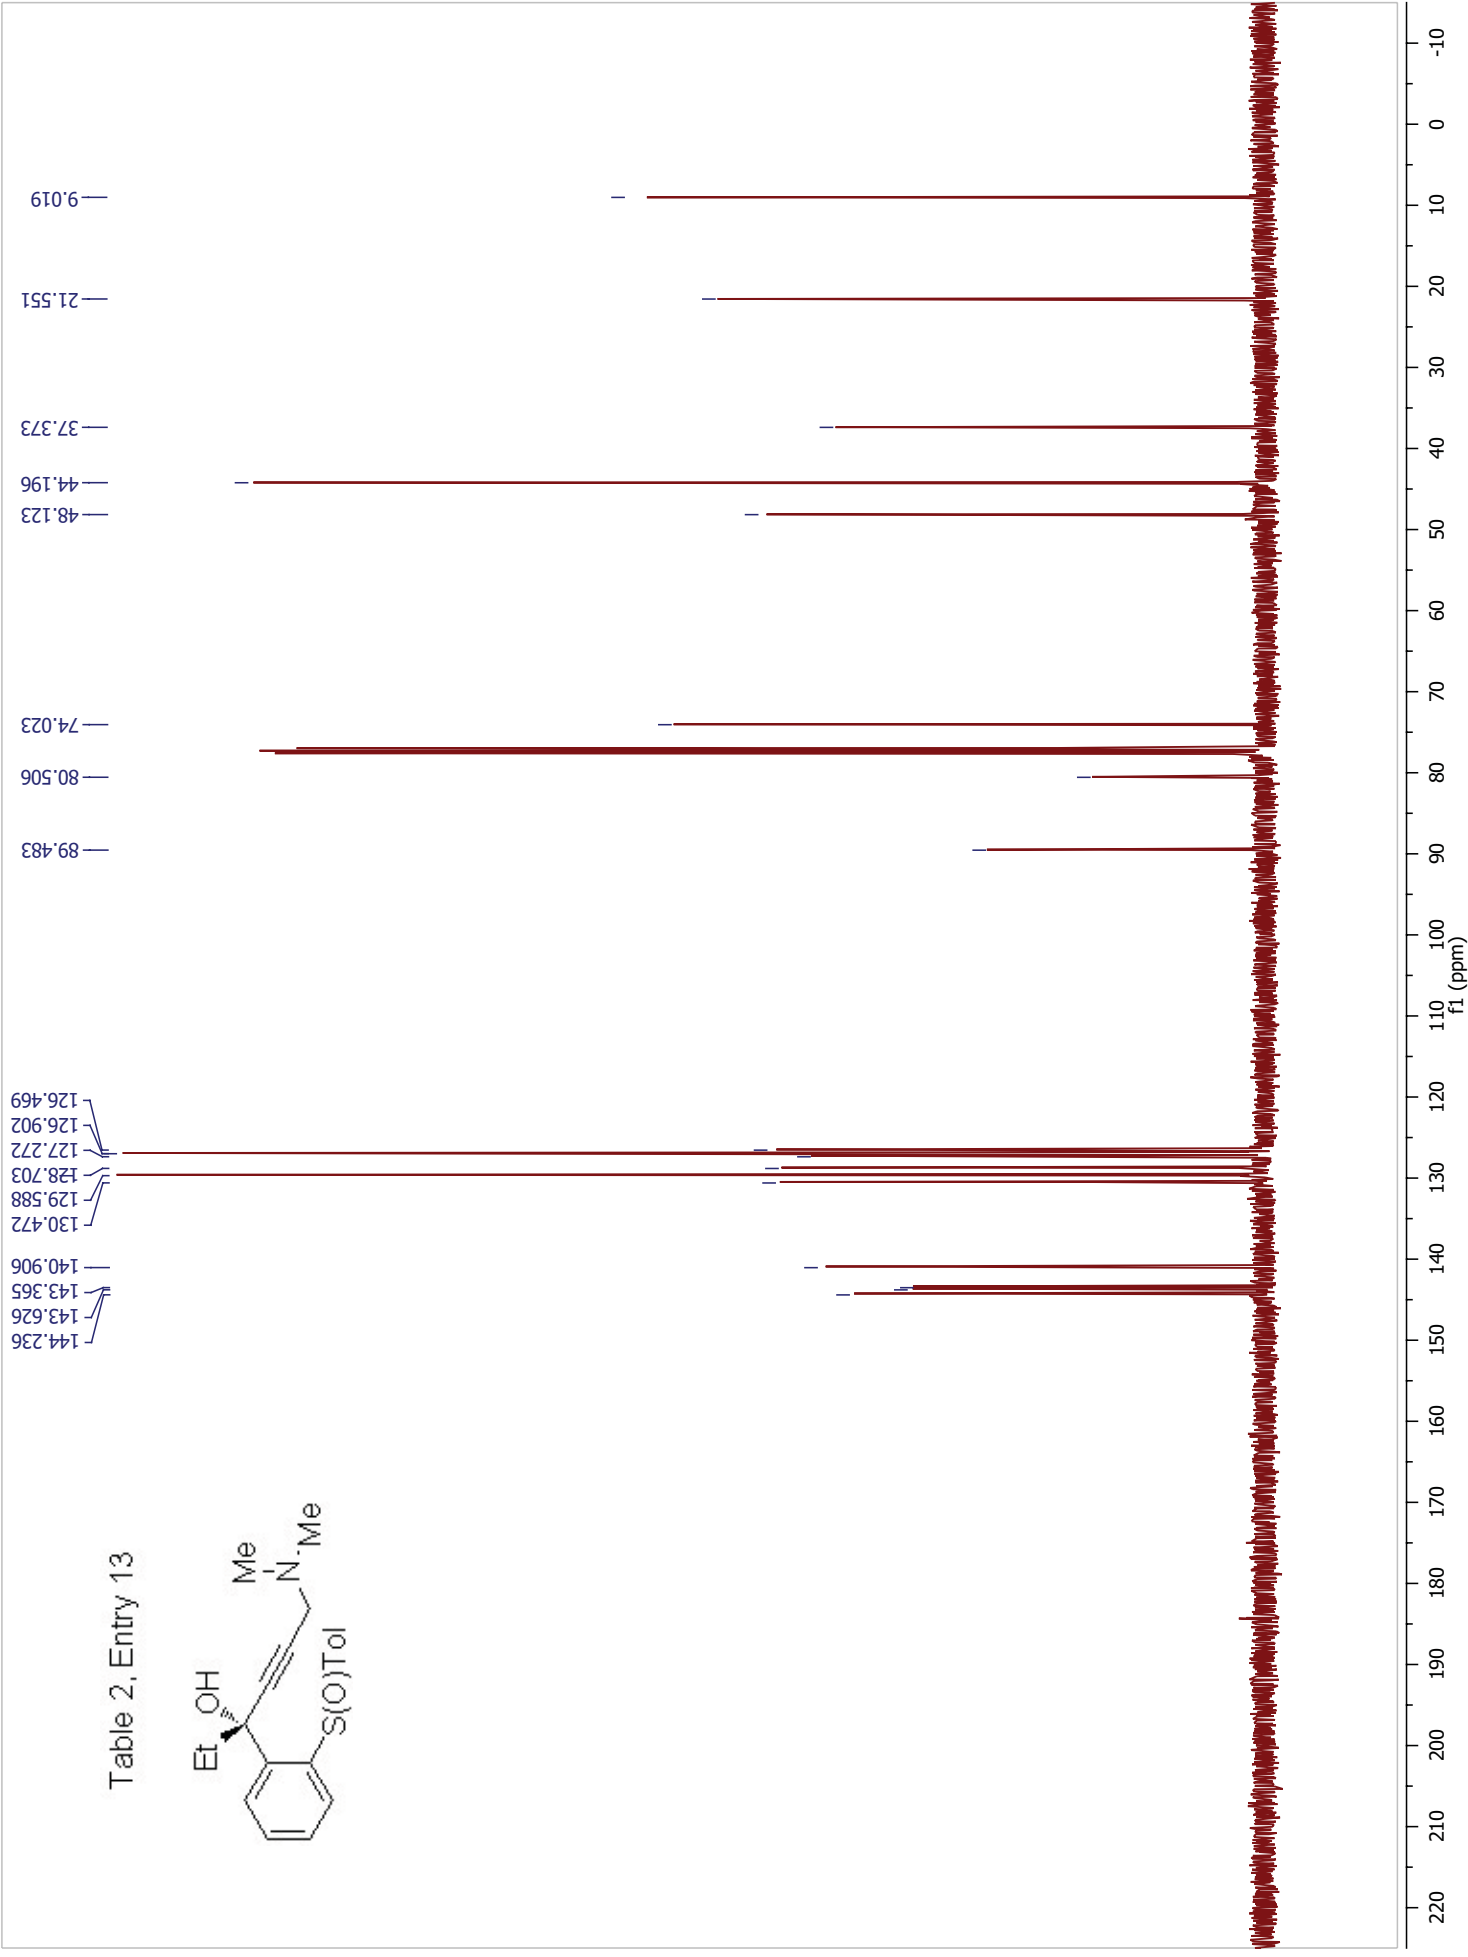

Table 2, Entry 14

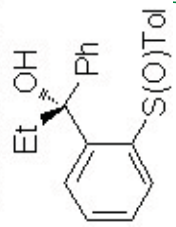

Handwritten annotations in green ink: a checkmark and a series of vertical lines.

Handwritten annotations in green ink: a checkmark and a series of vertical lines.

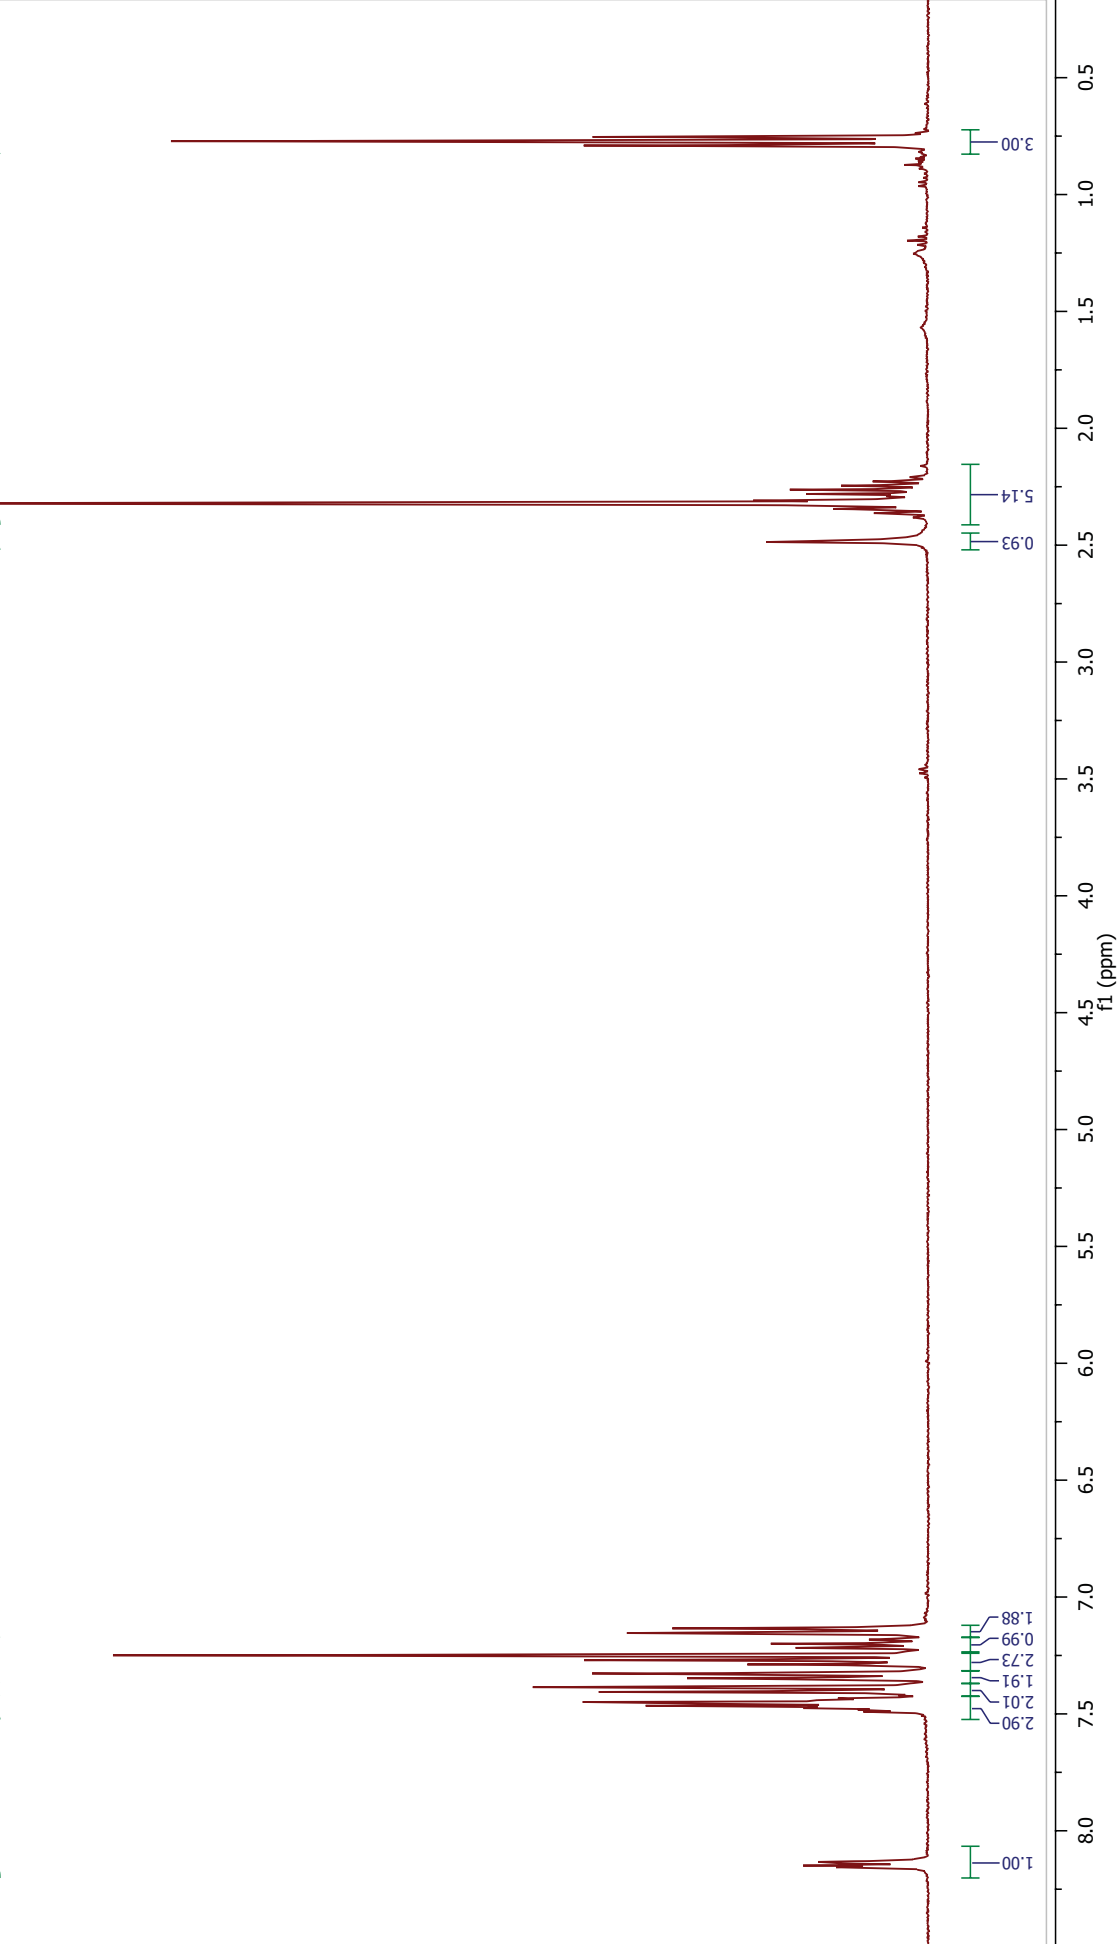

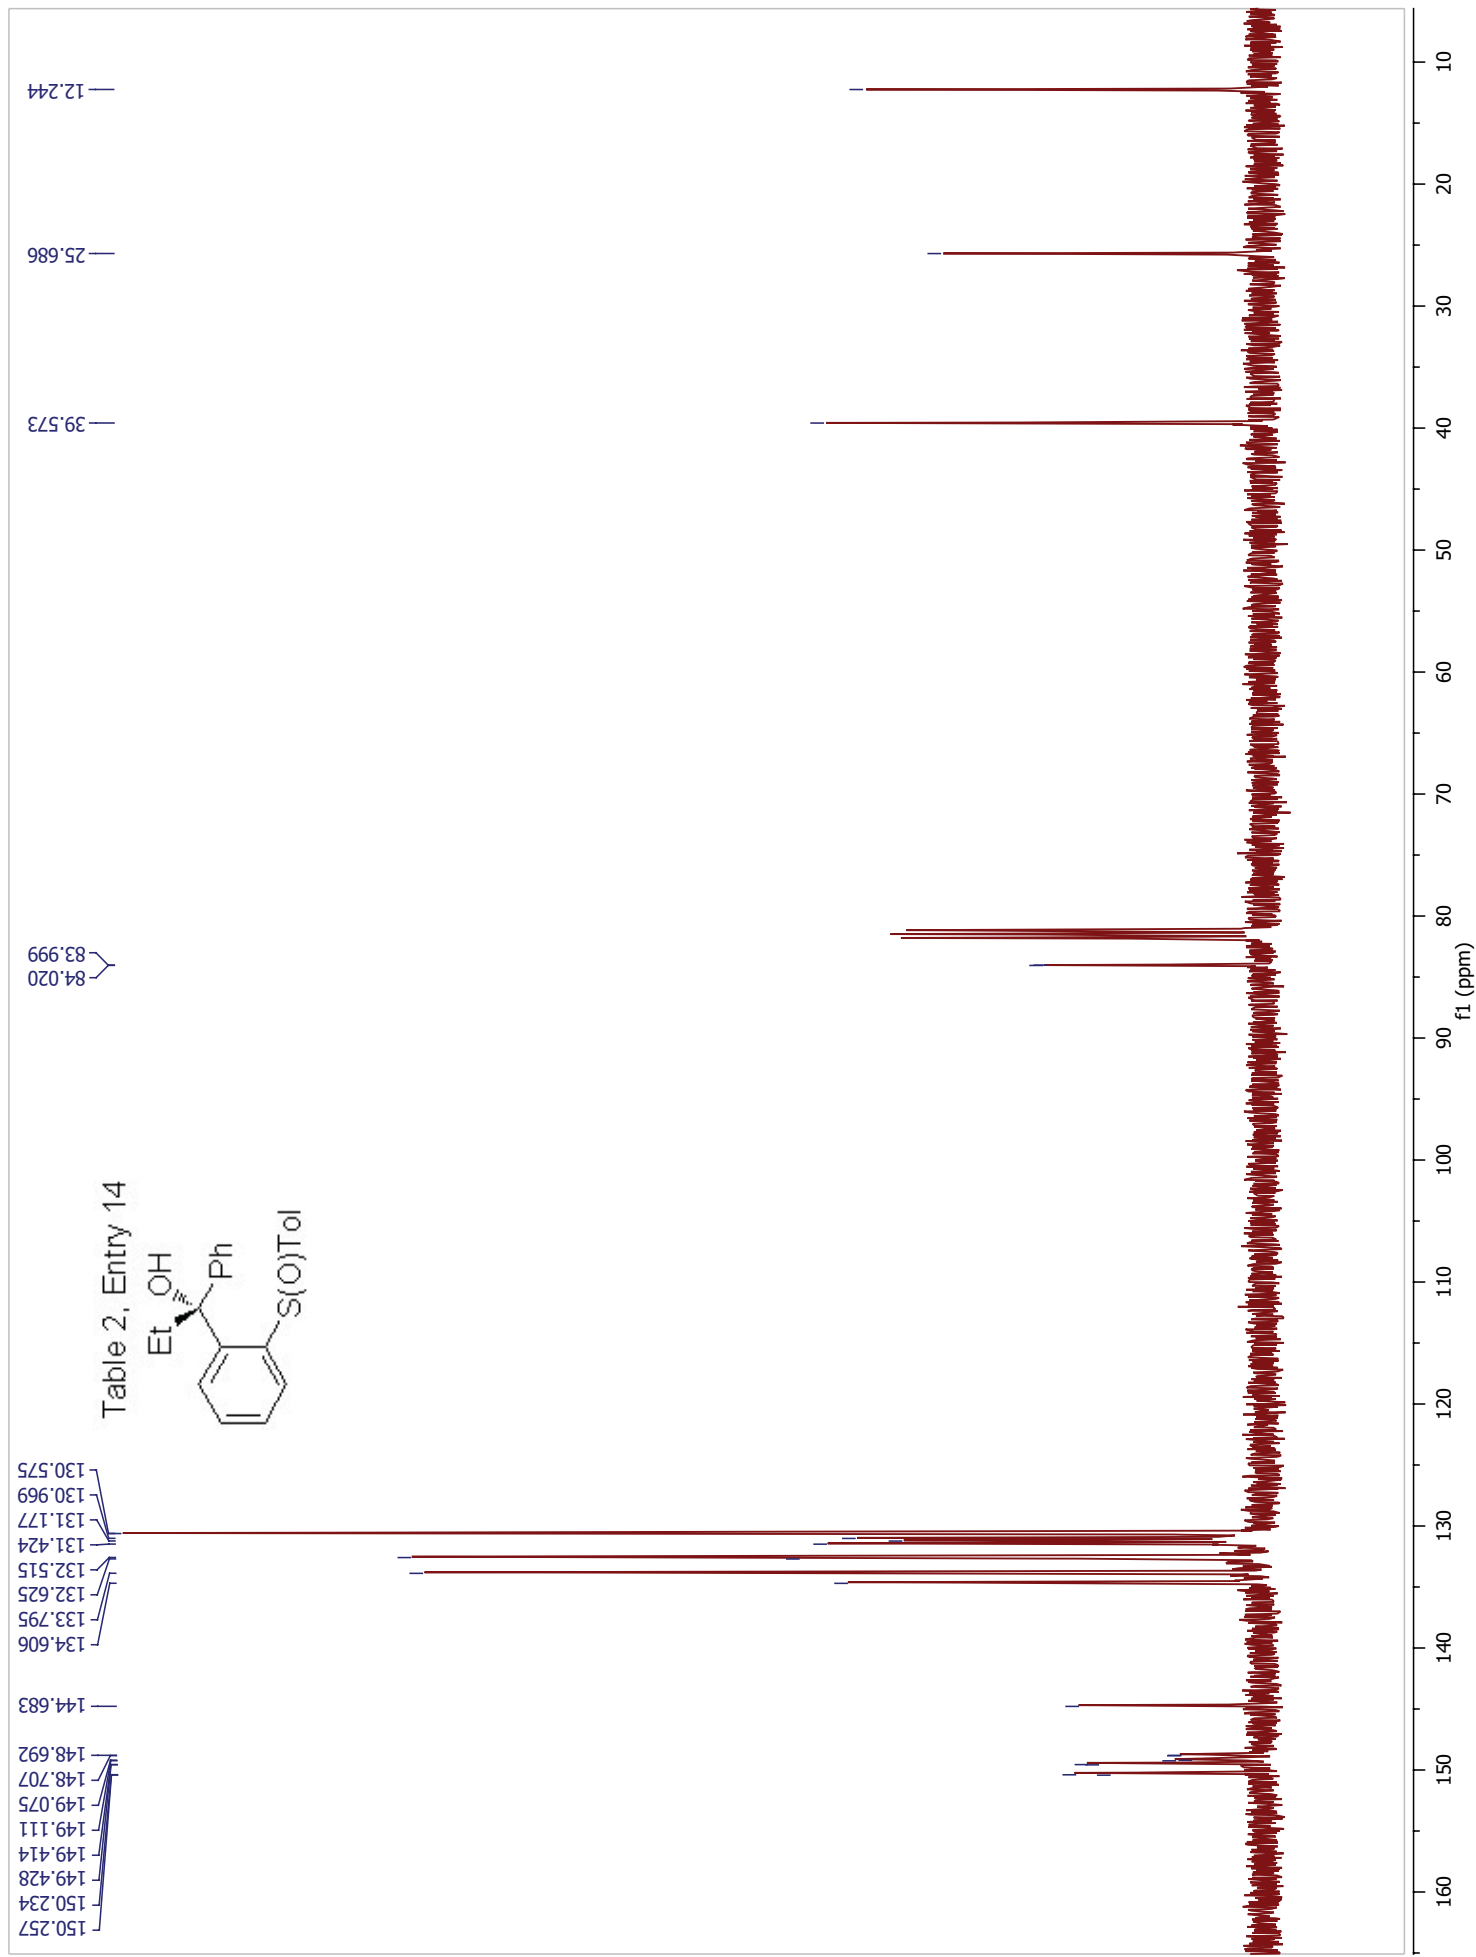

Table 2, Entry 15

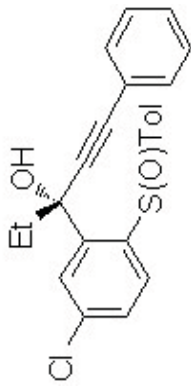

Handwritten annotations in green ink: a bracket on the left side of the structure and several vertical lines on the right side, likely indicating integration regions for the NMR spectrum.

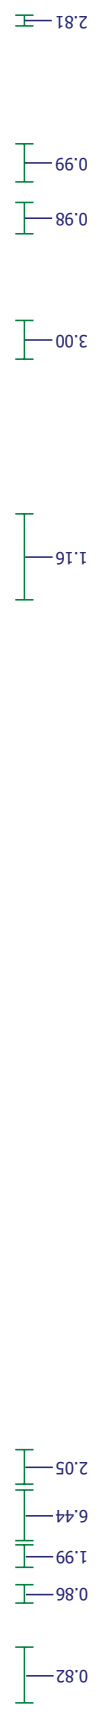

Table 2, Entry 15

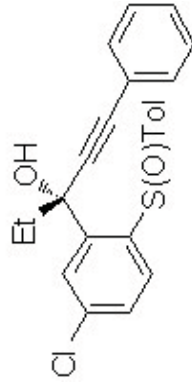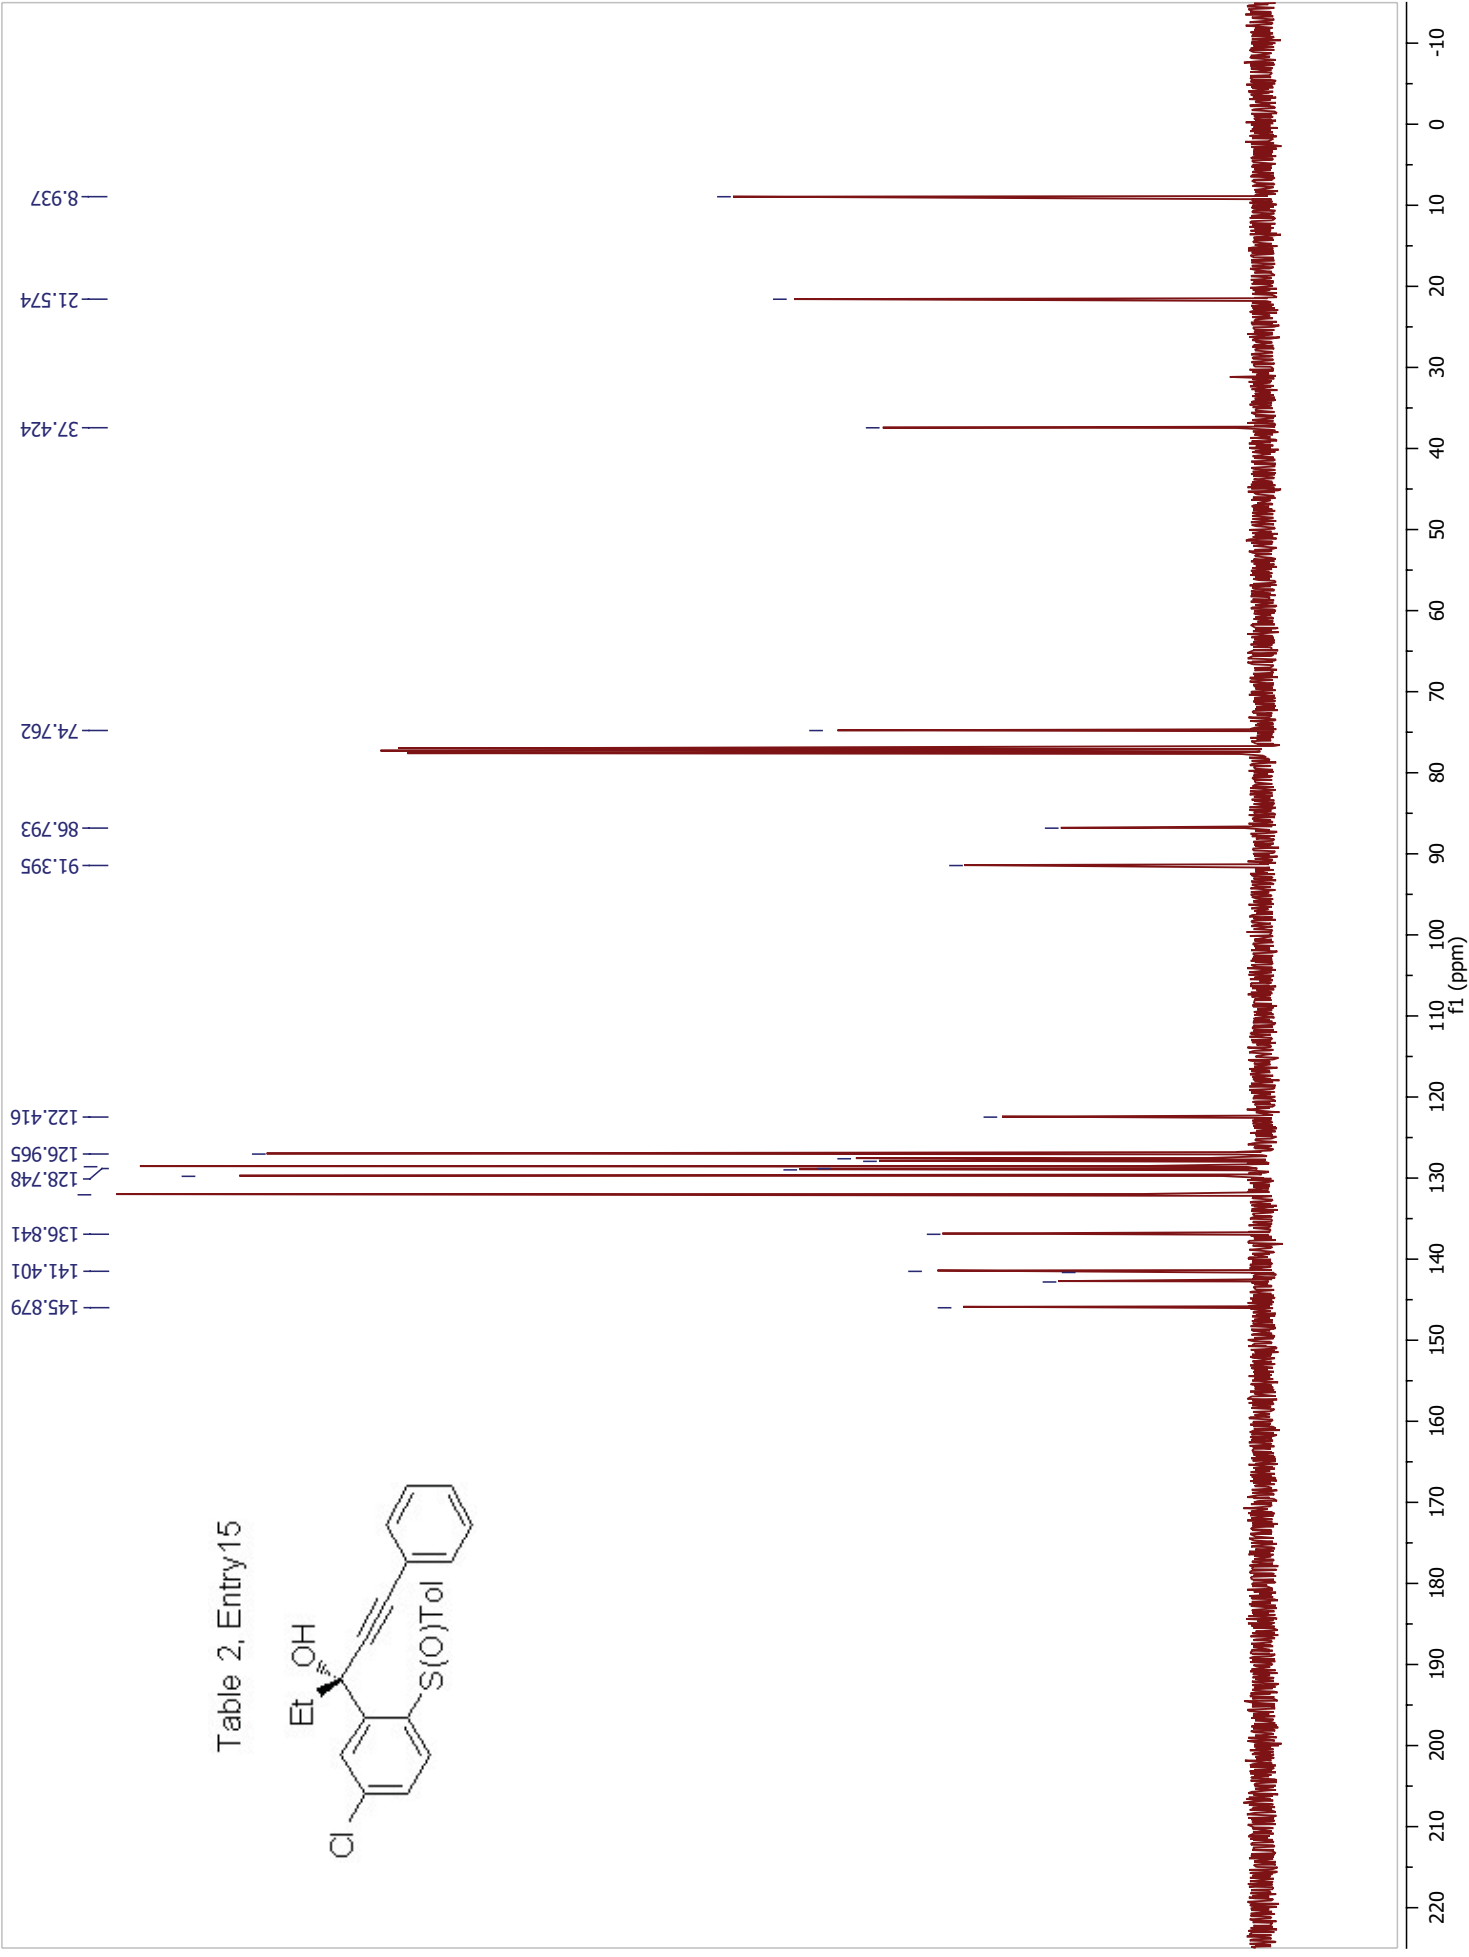

Table 2, Entry 16

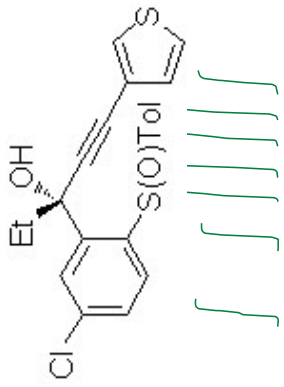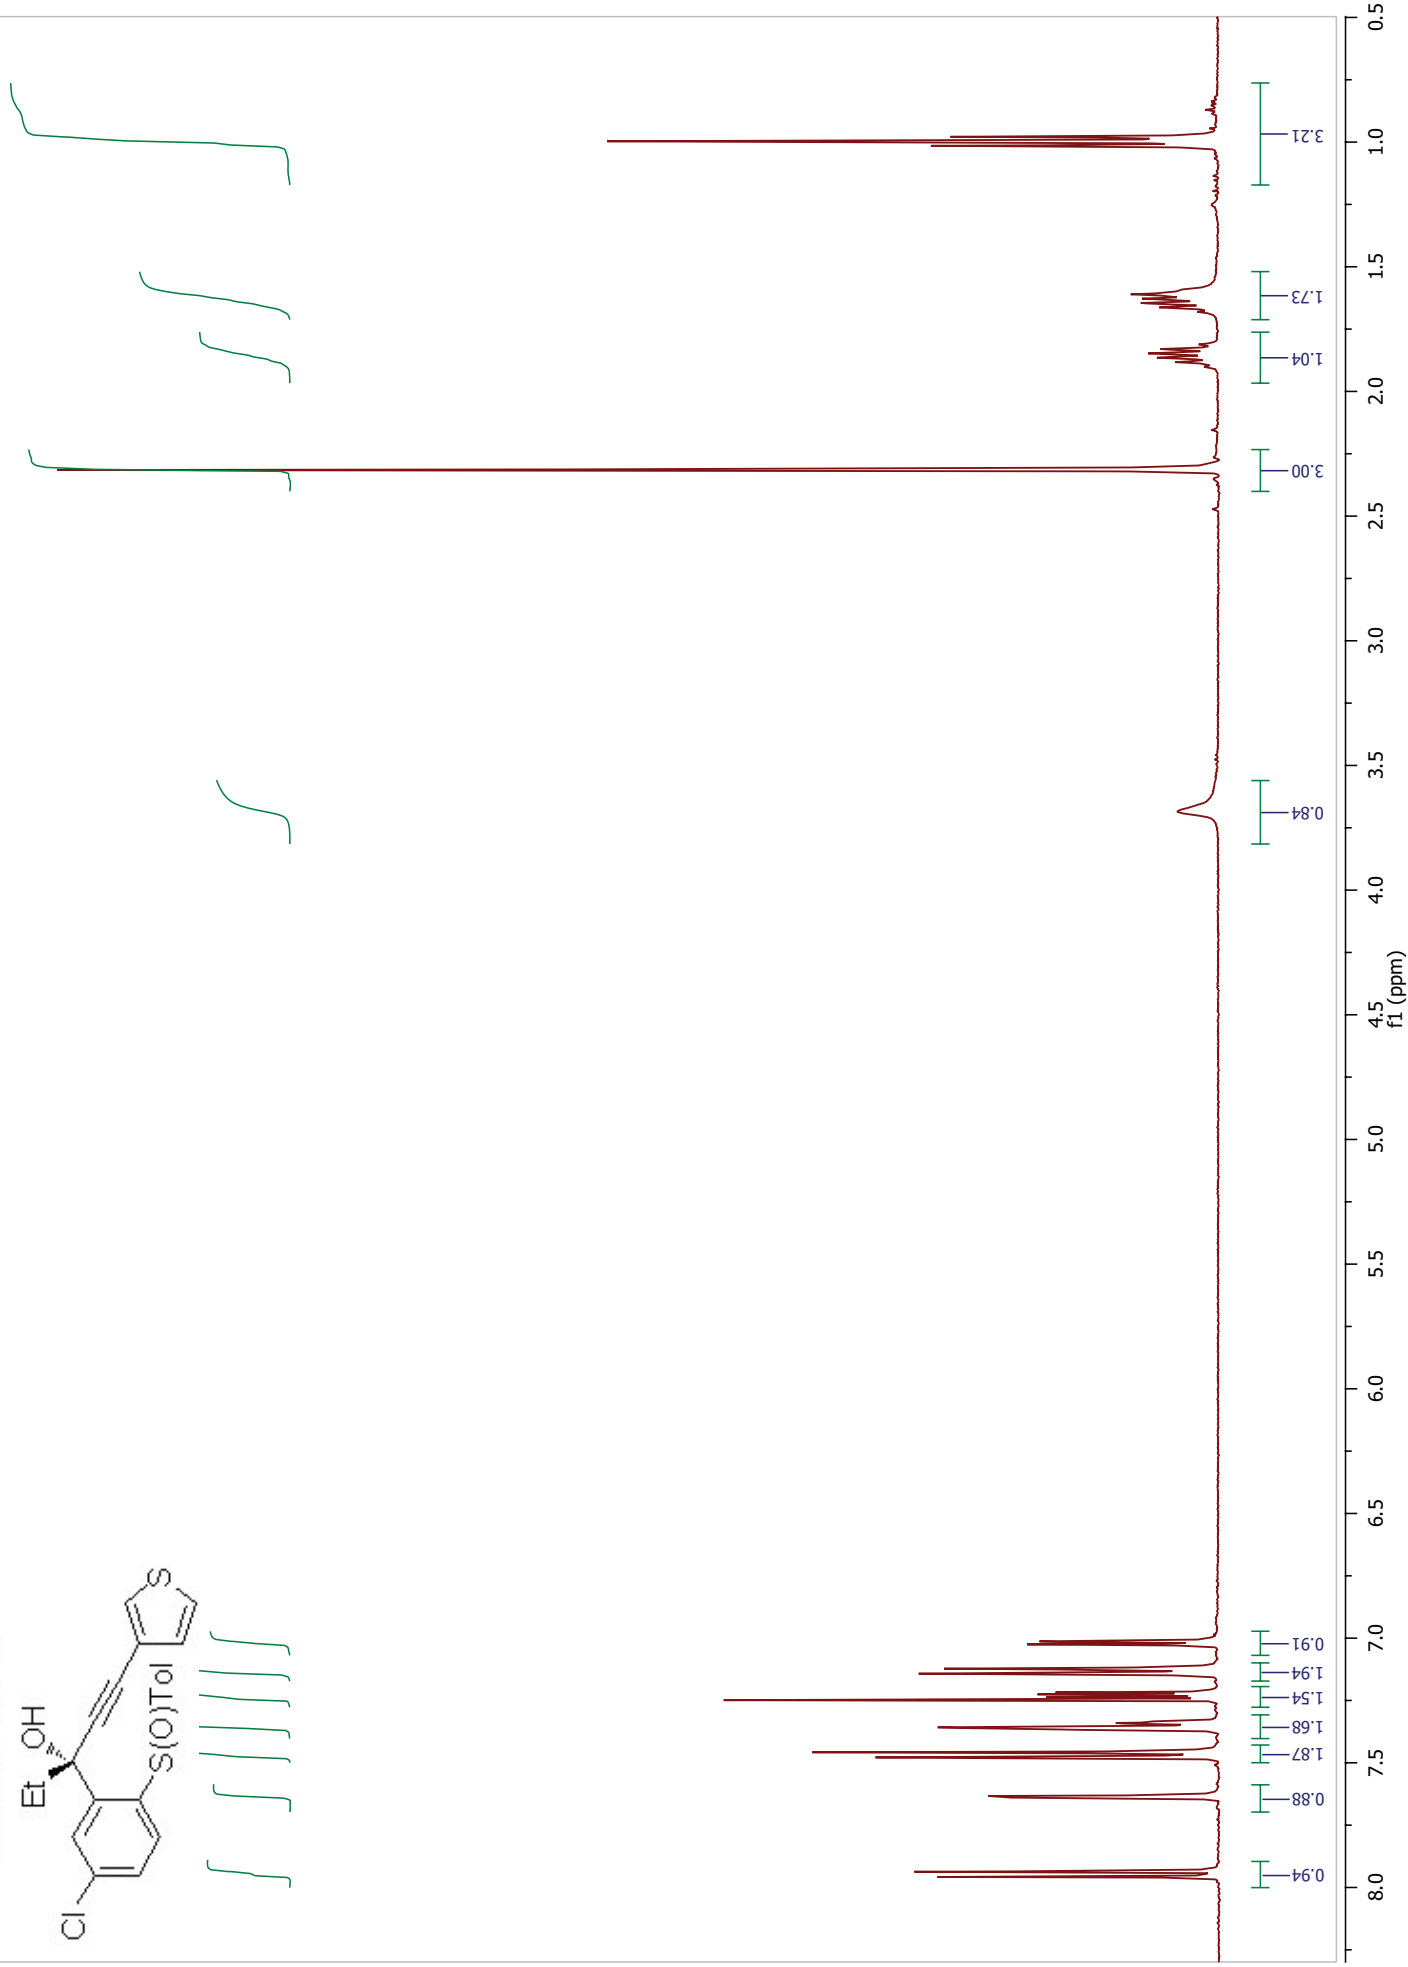

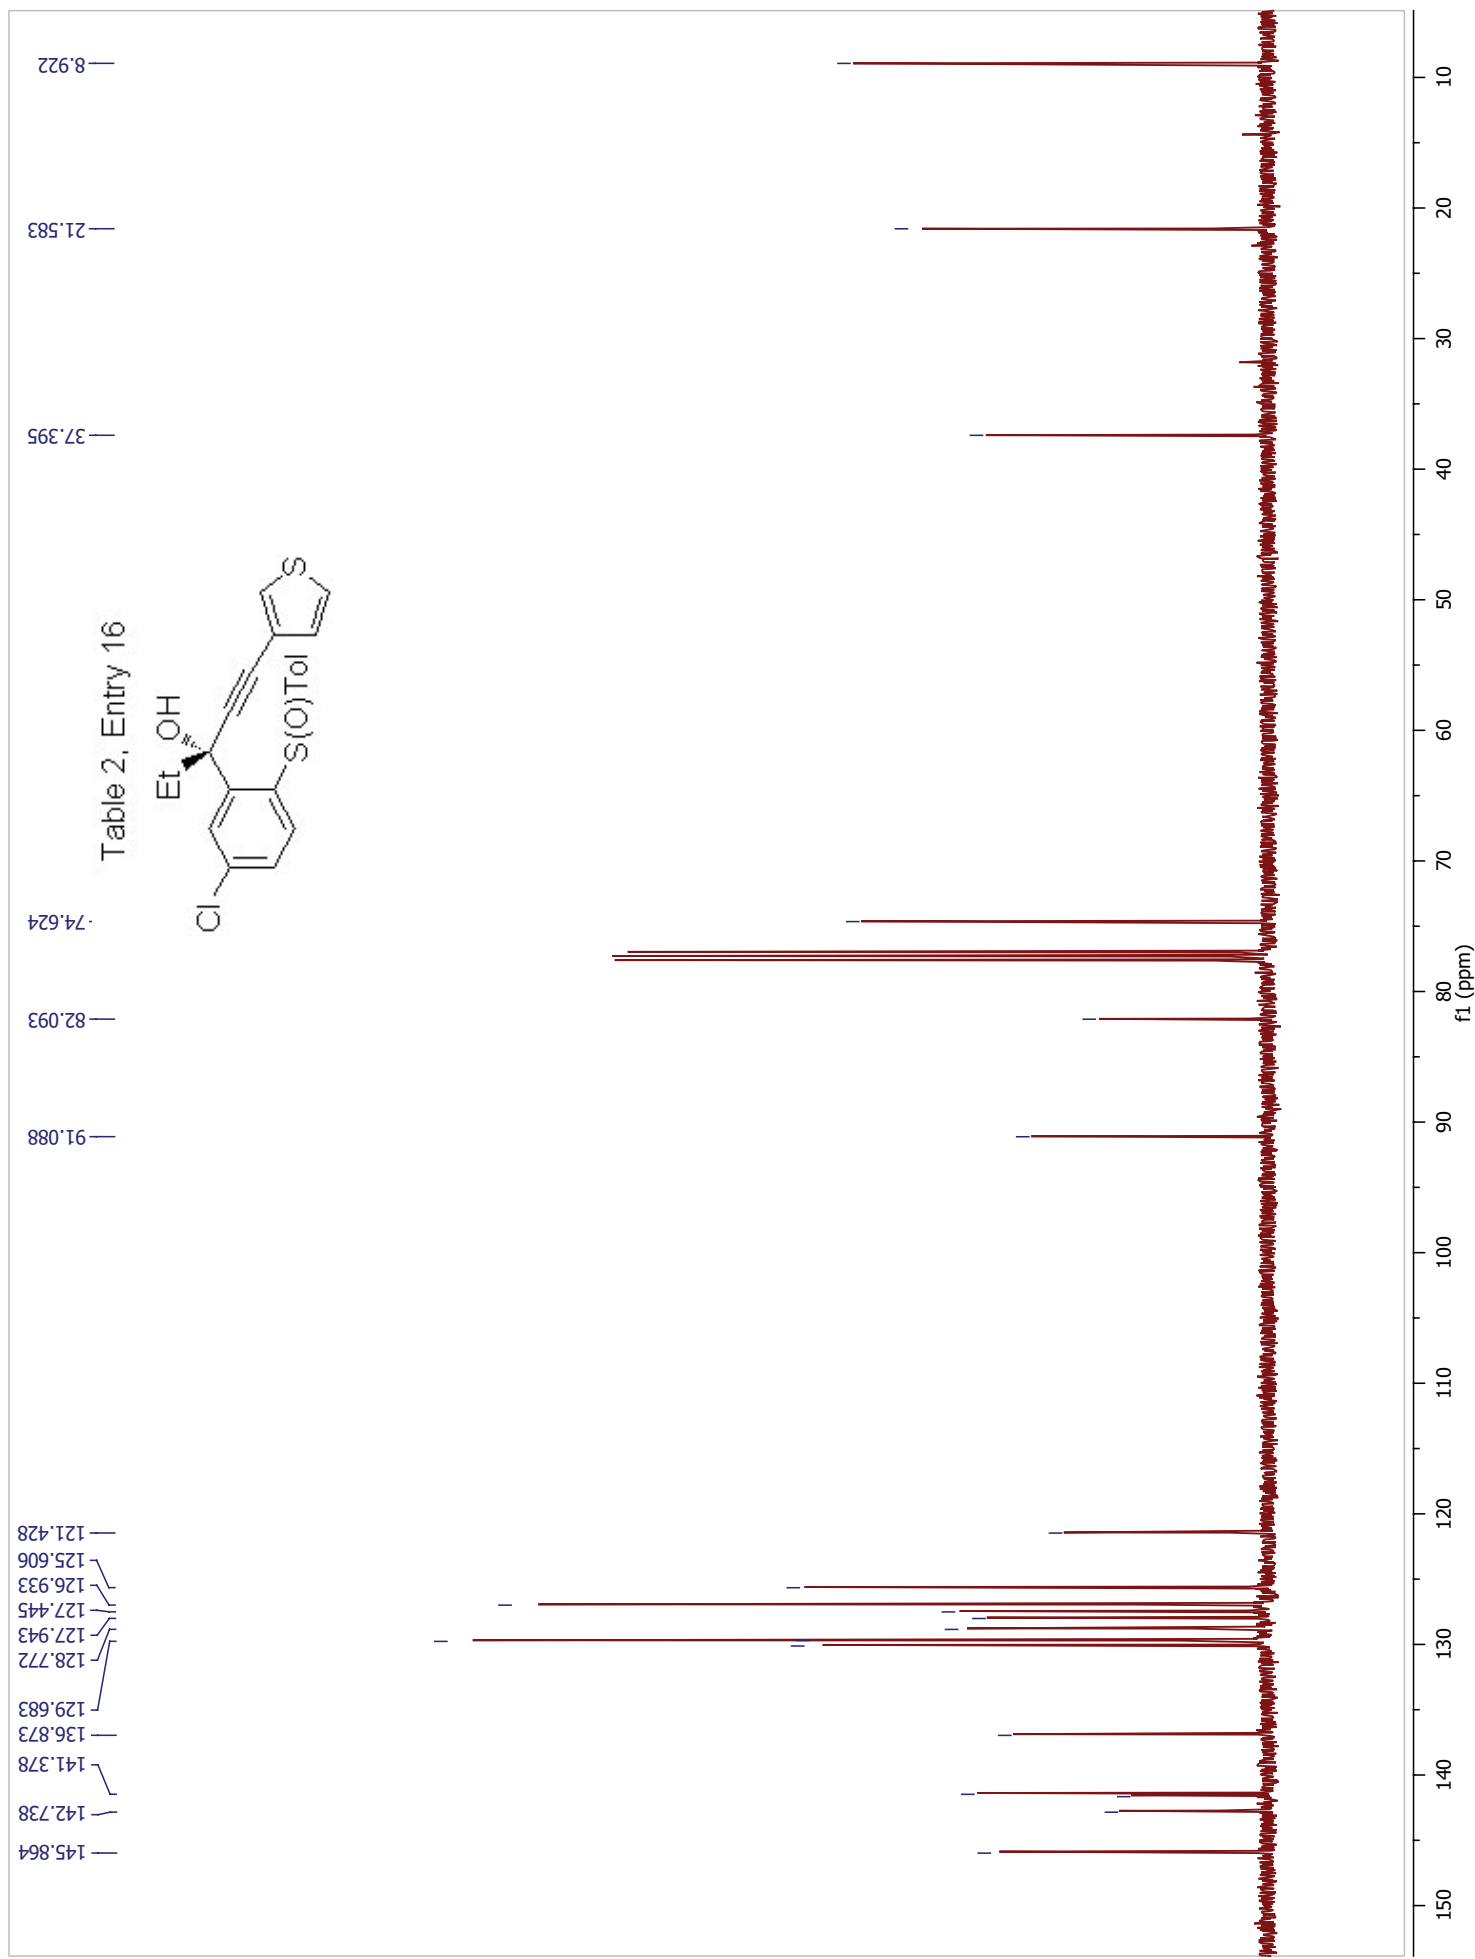

Table 2, Entry 17

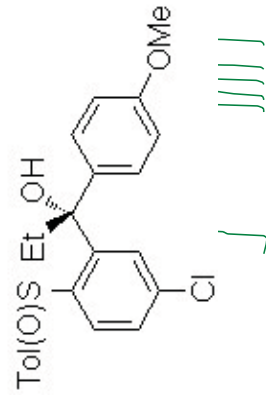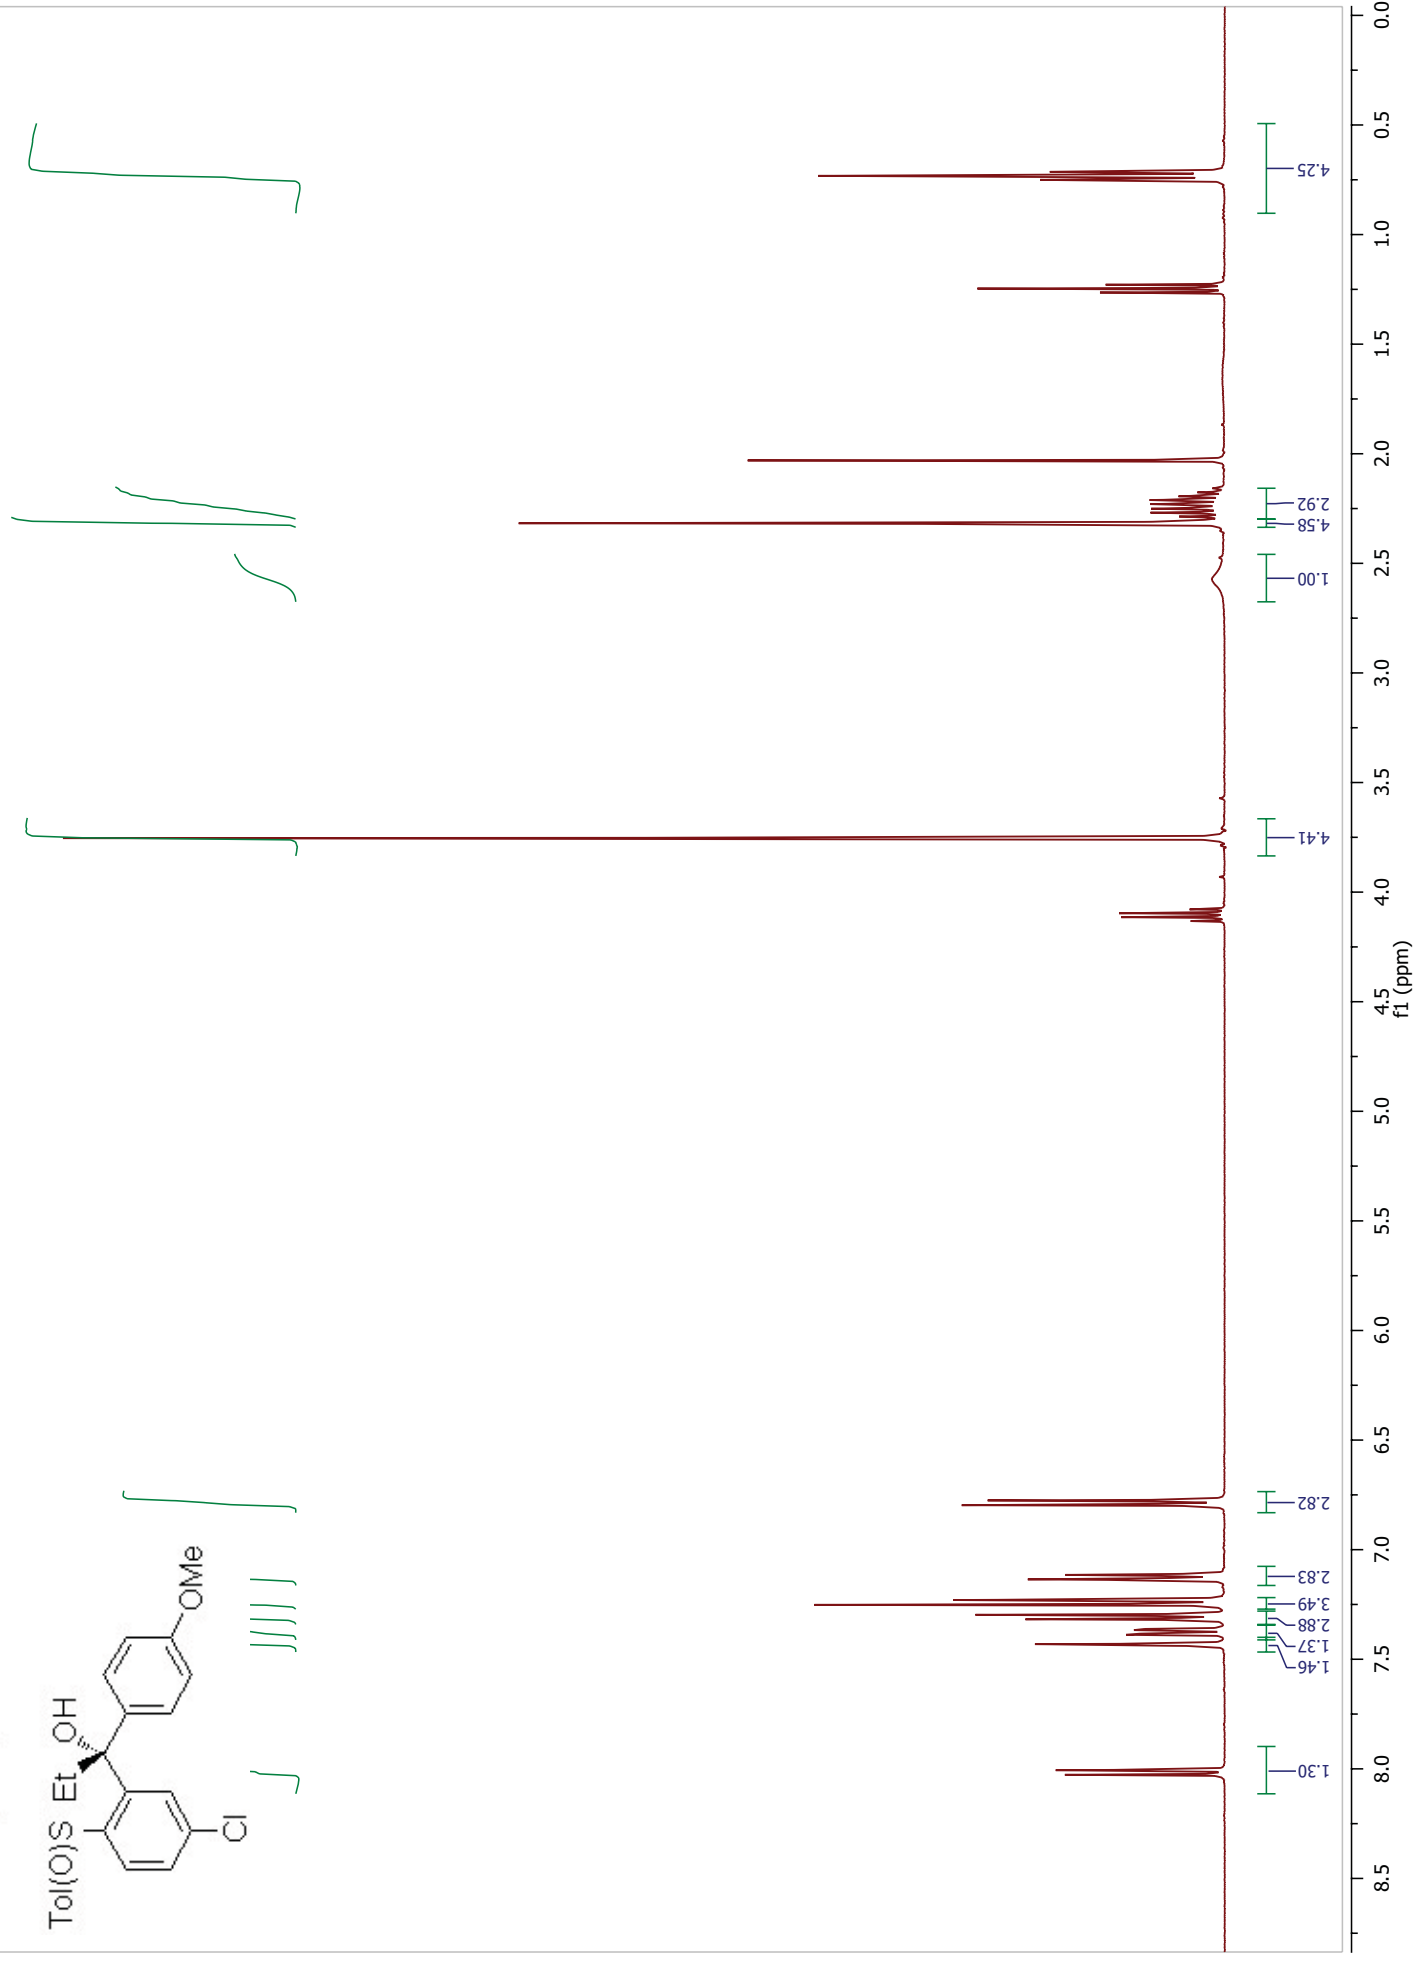



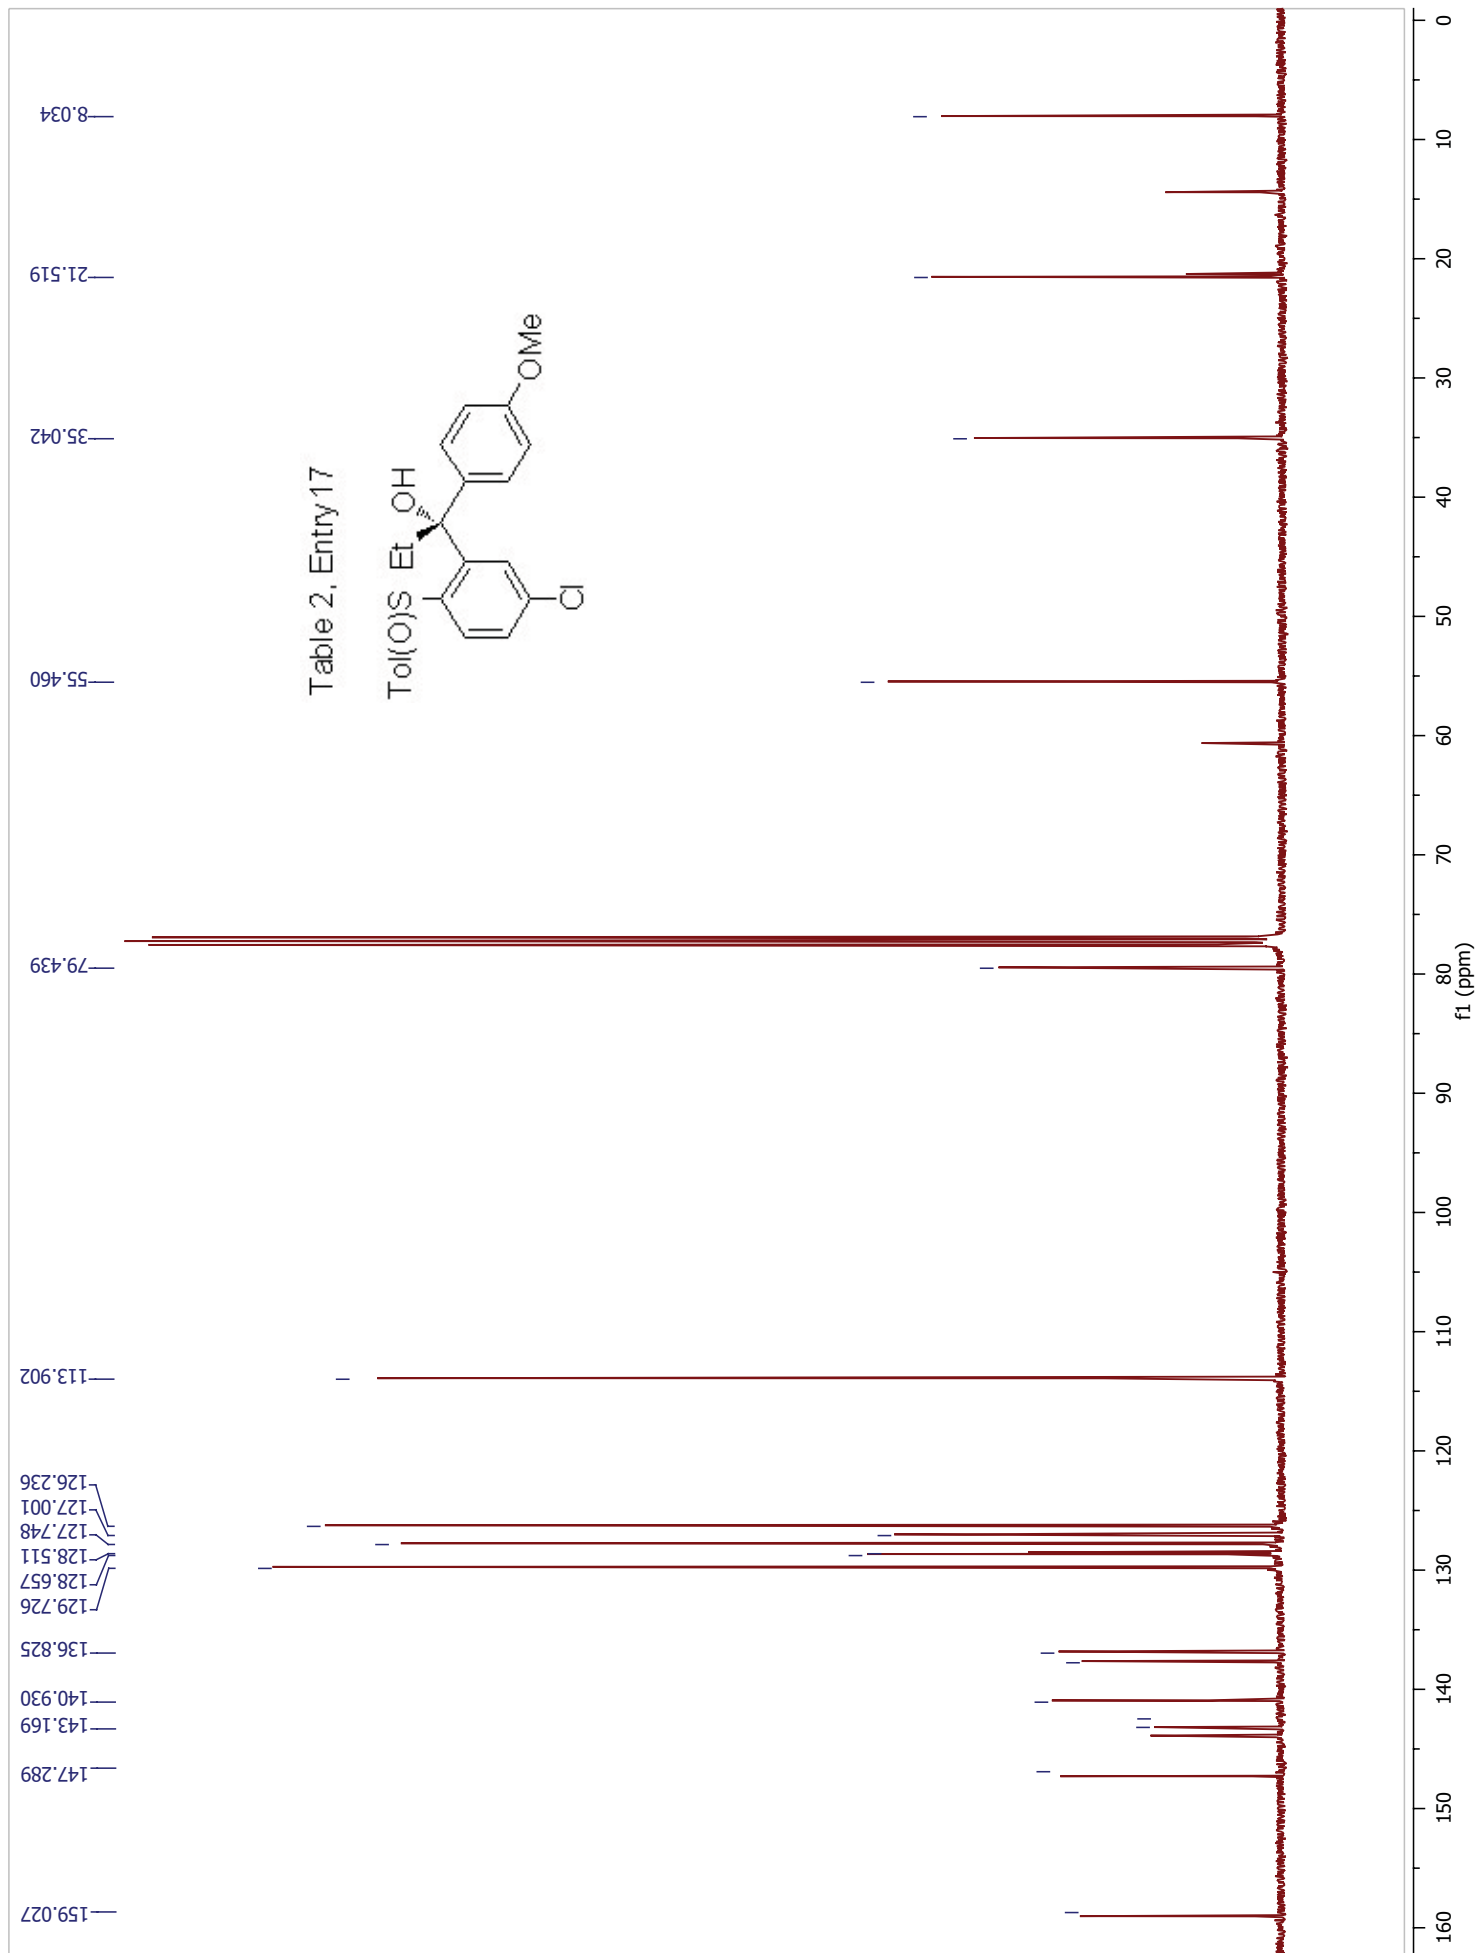

Table 2, Entry 18

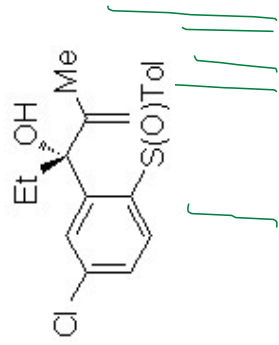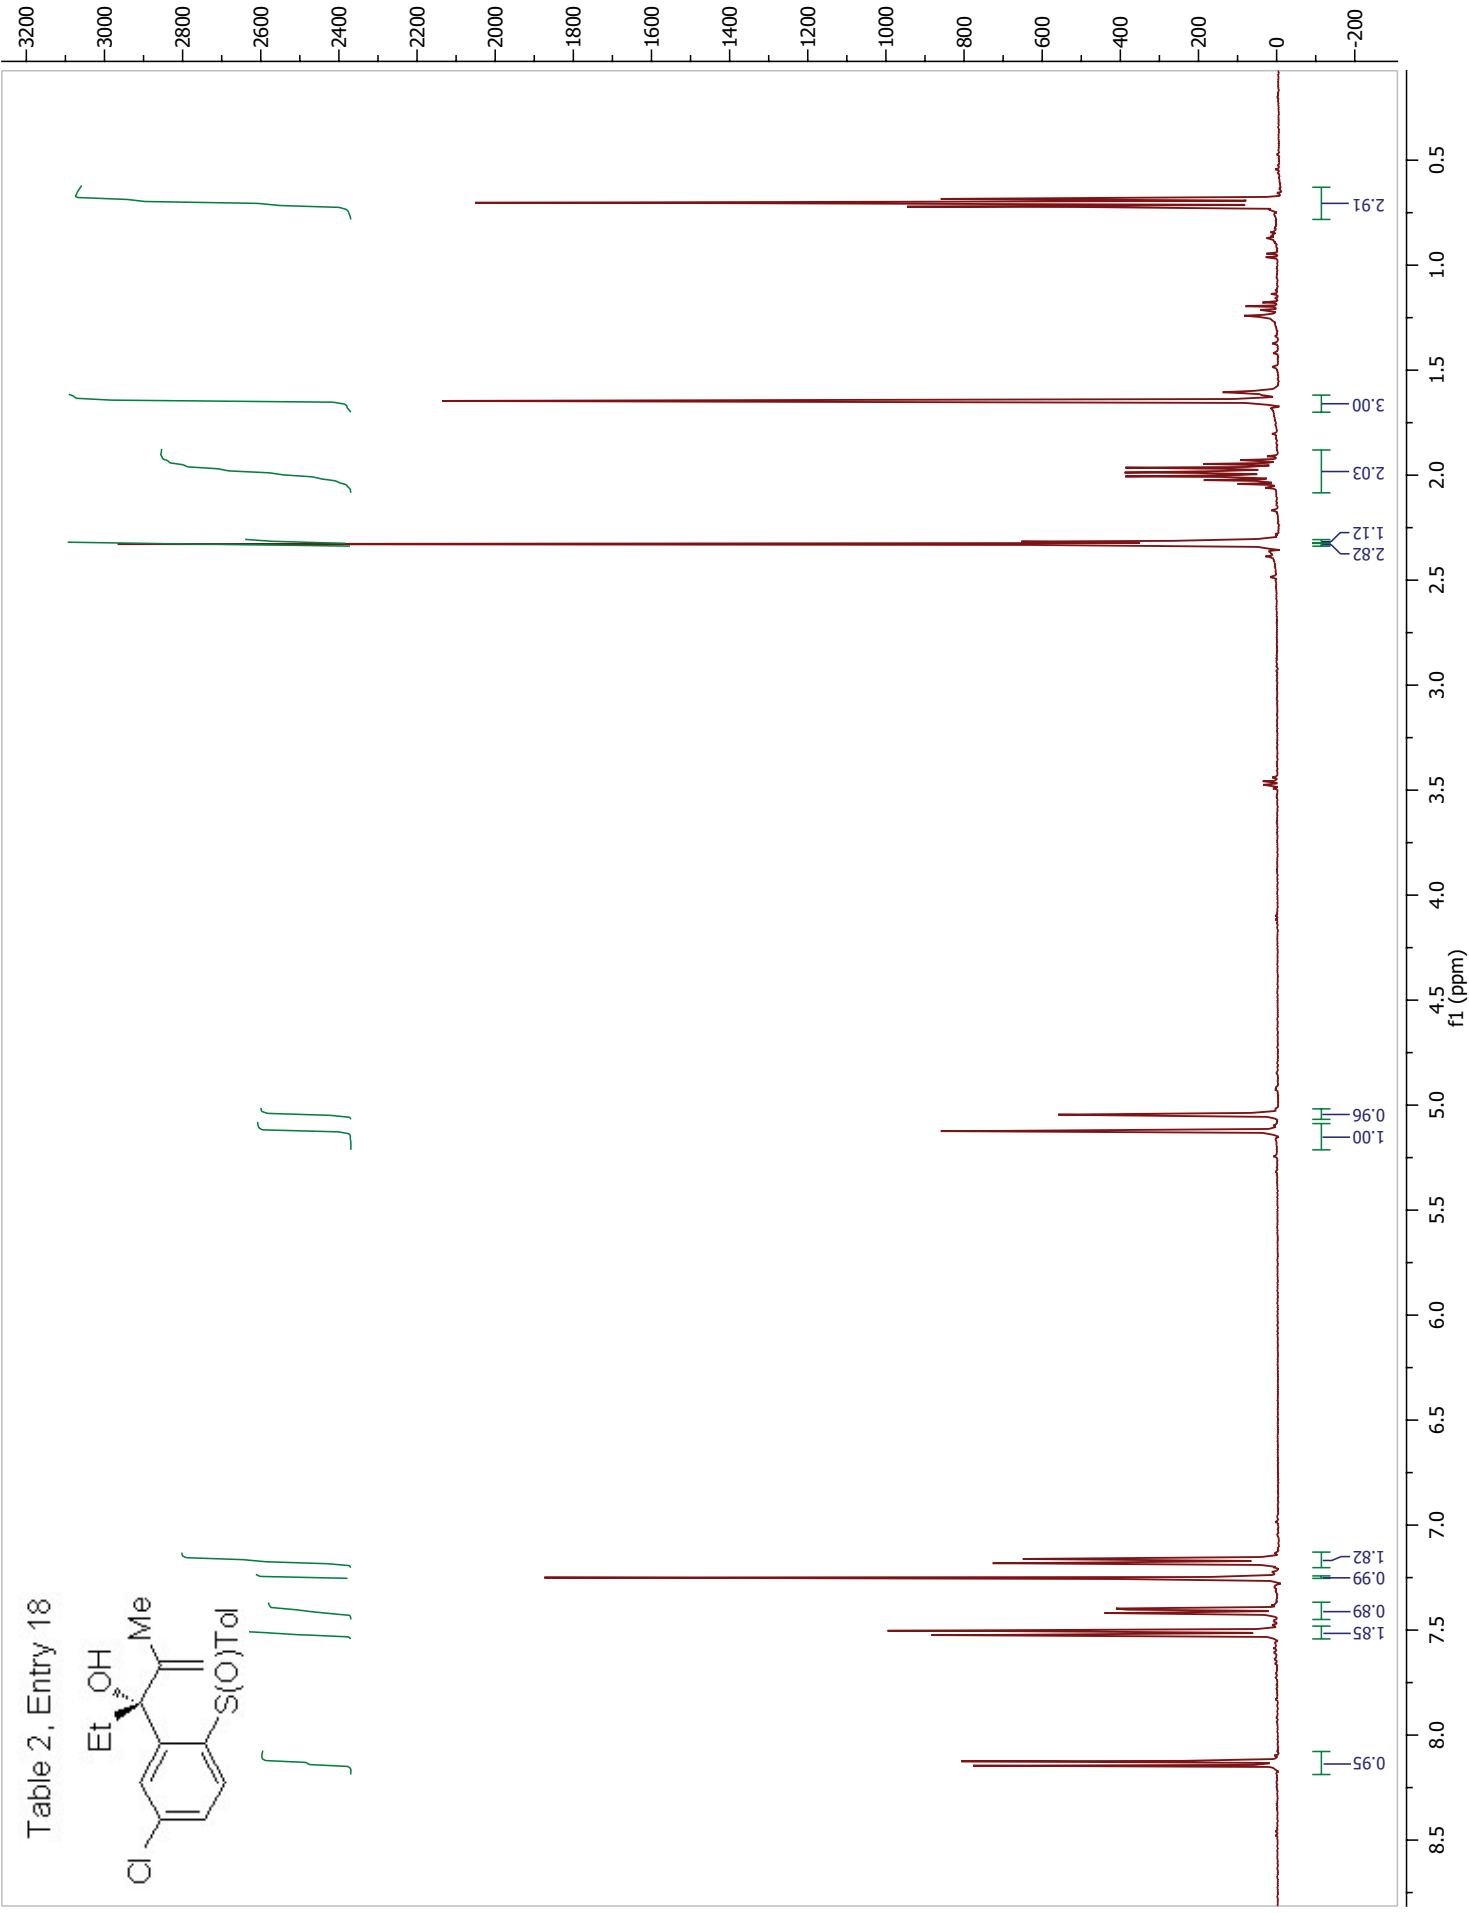

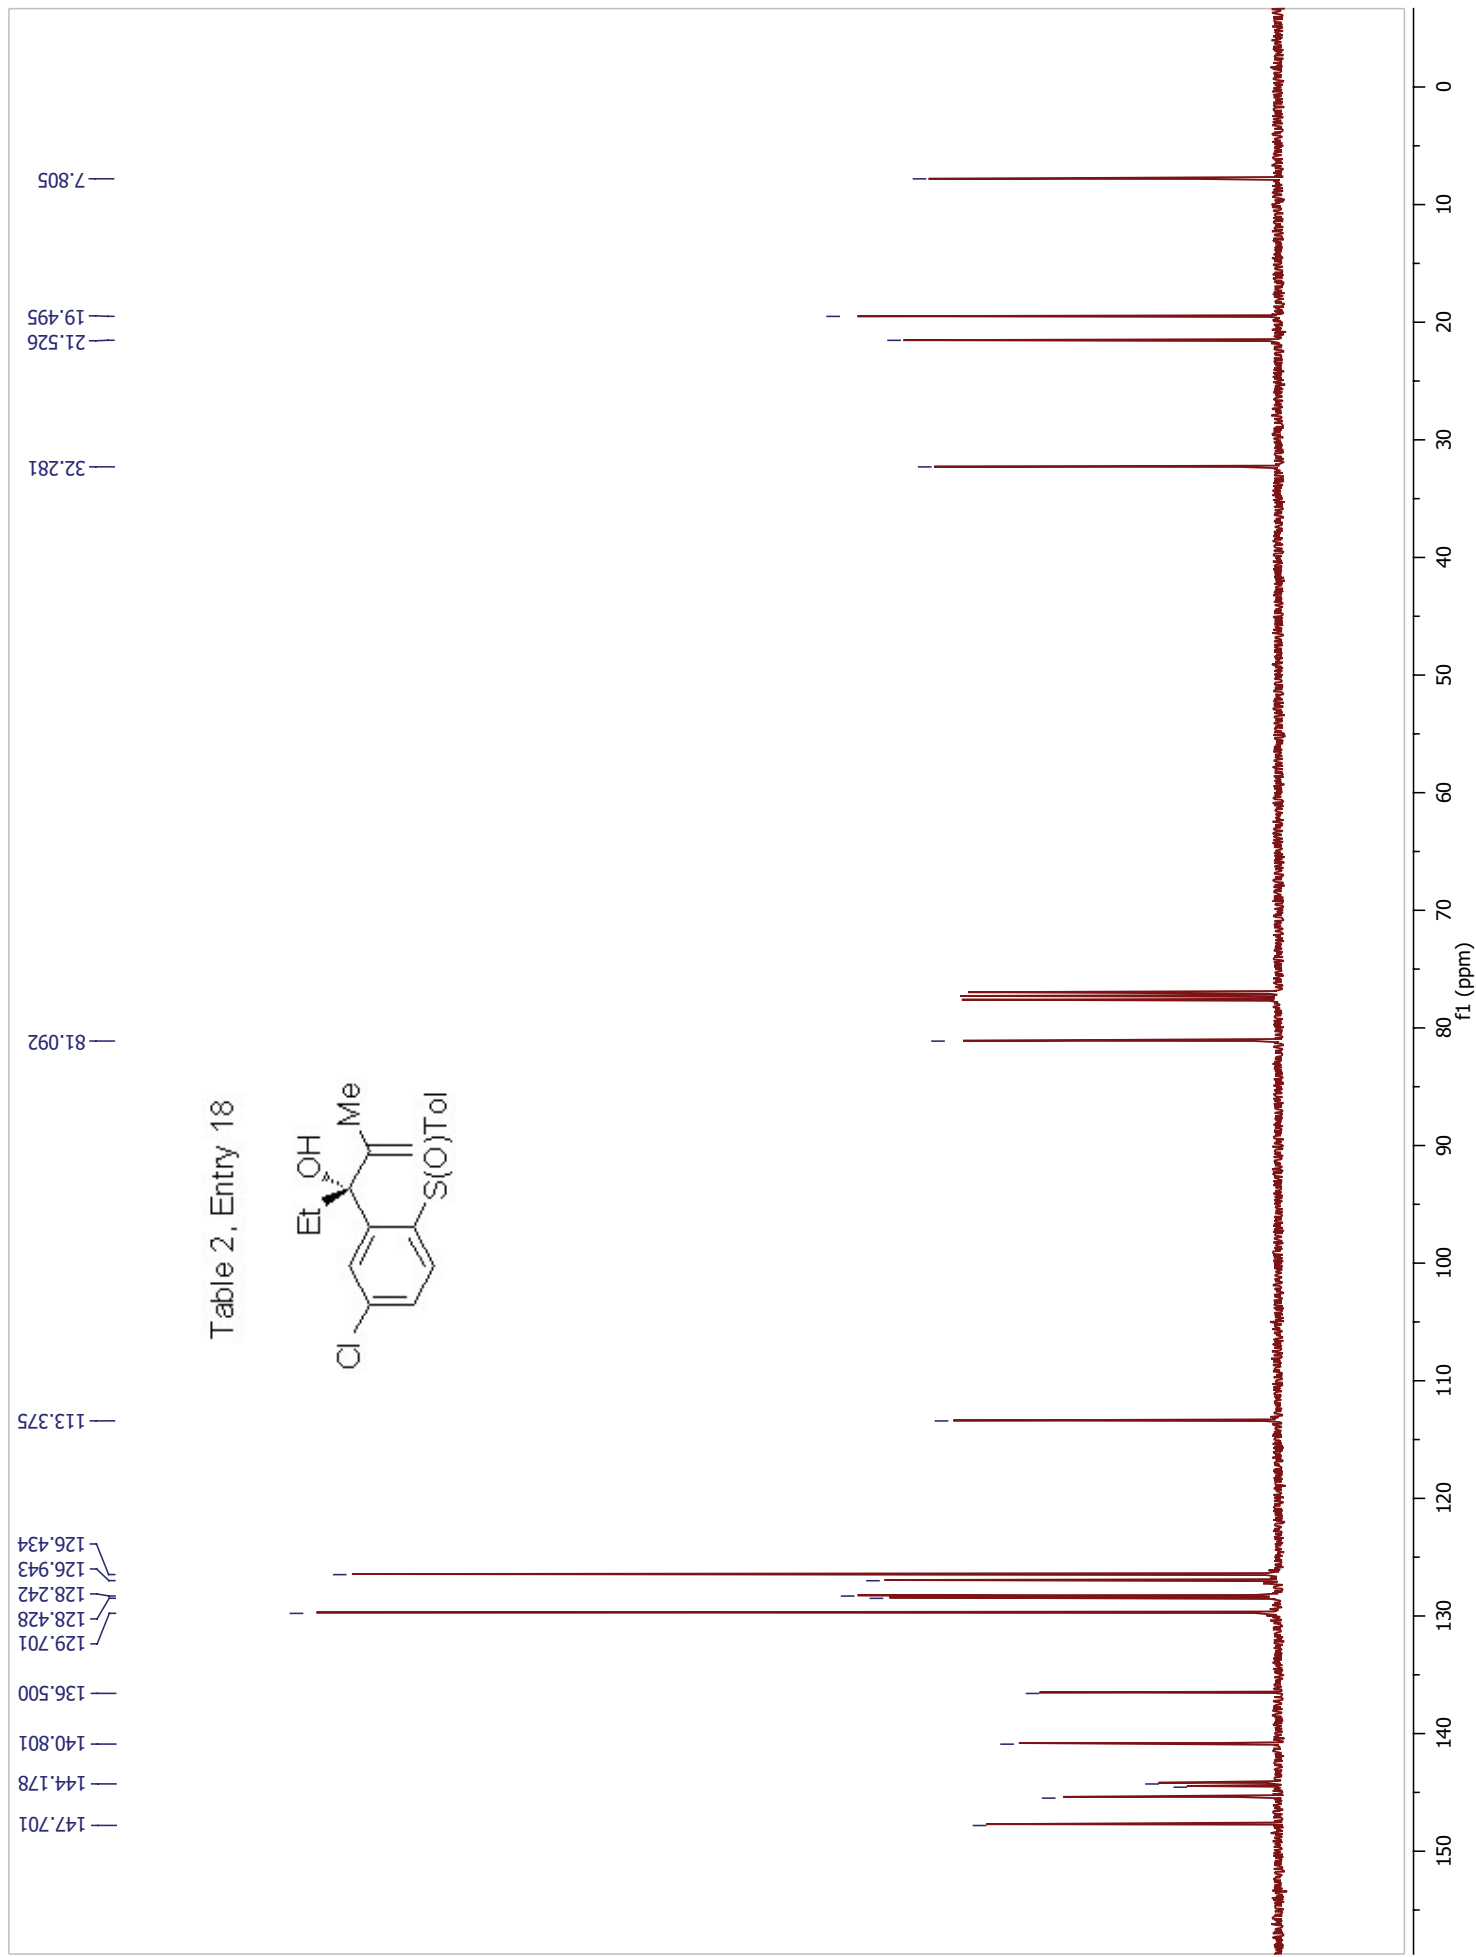

Table 2, Entry 19

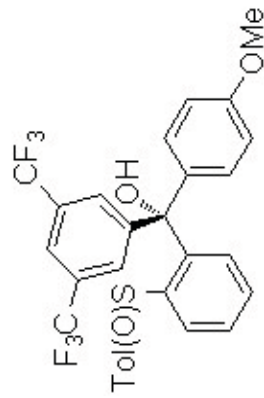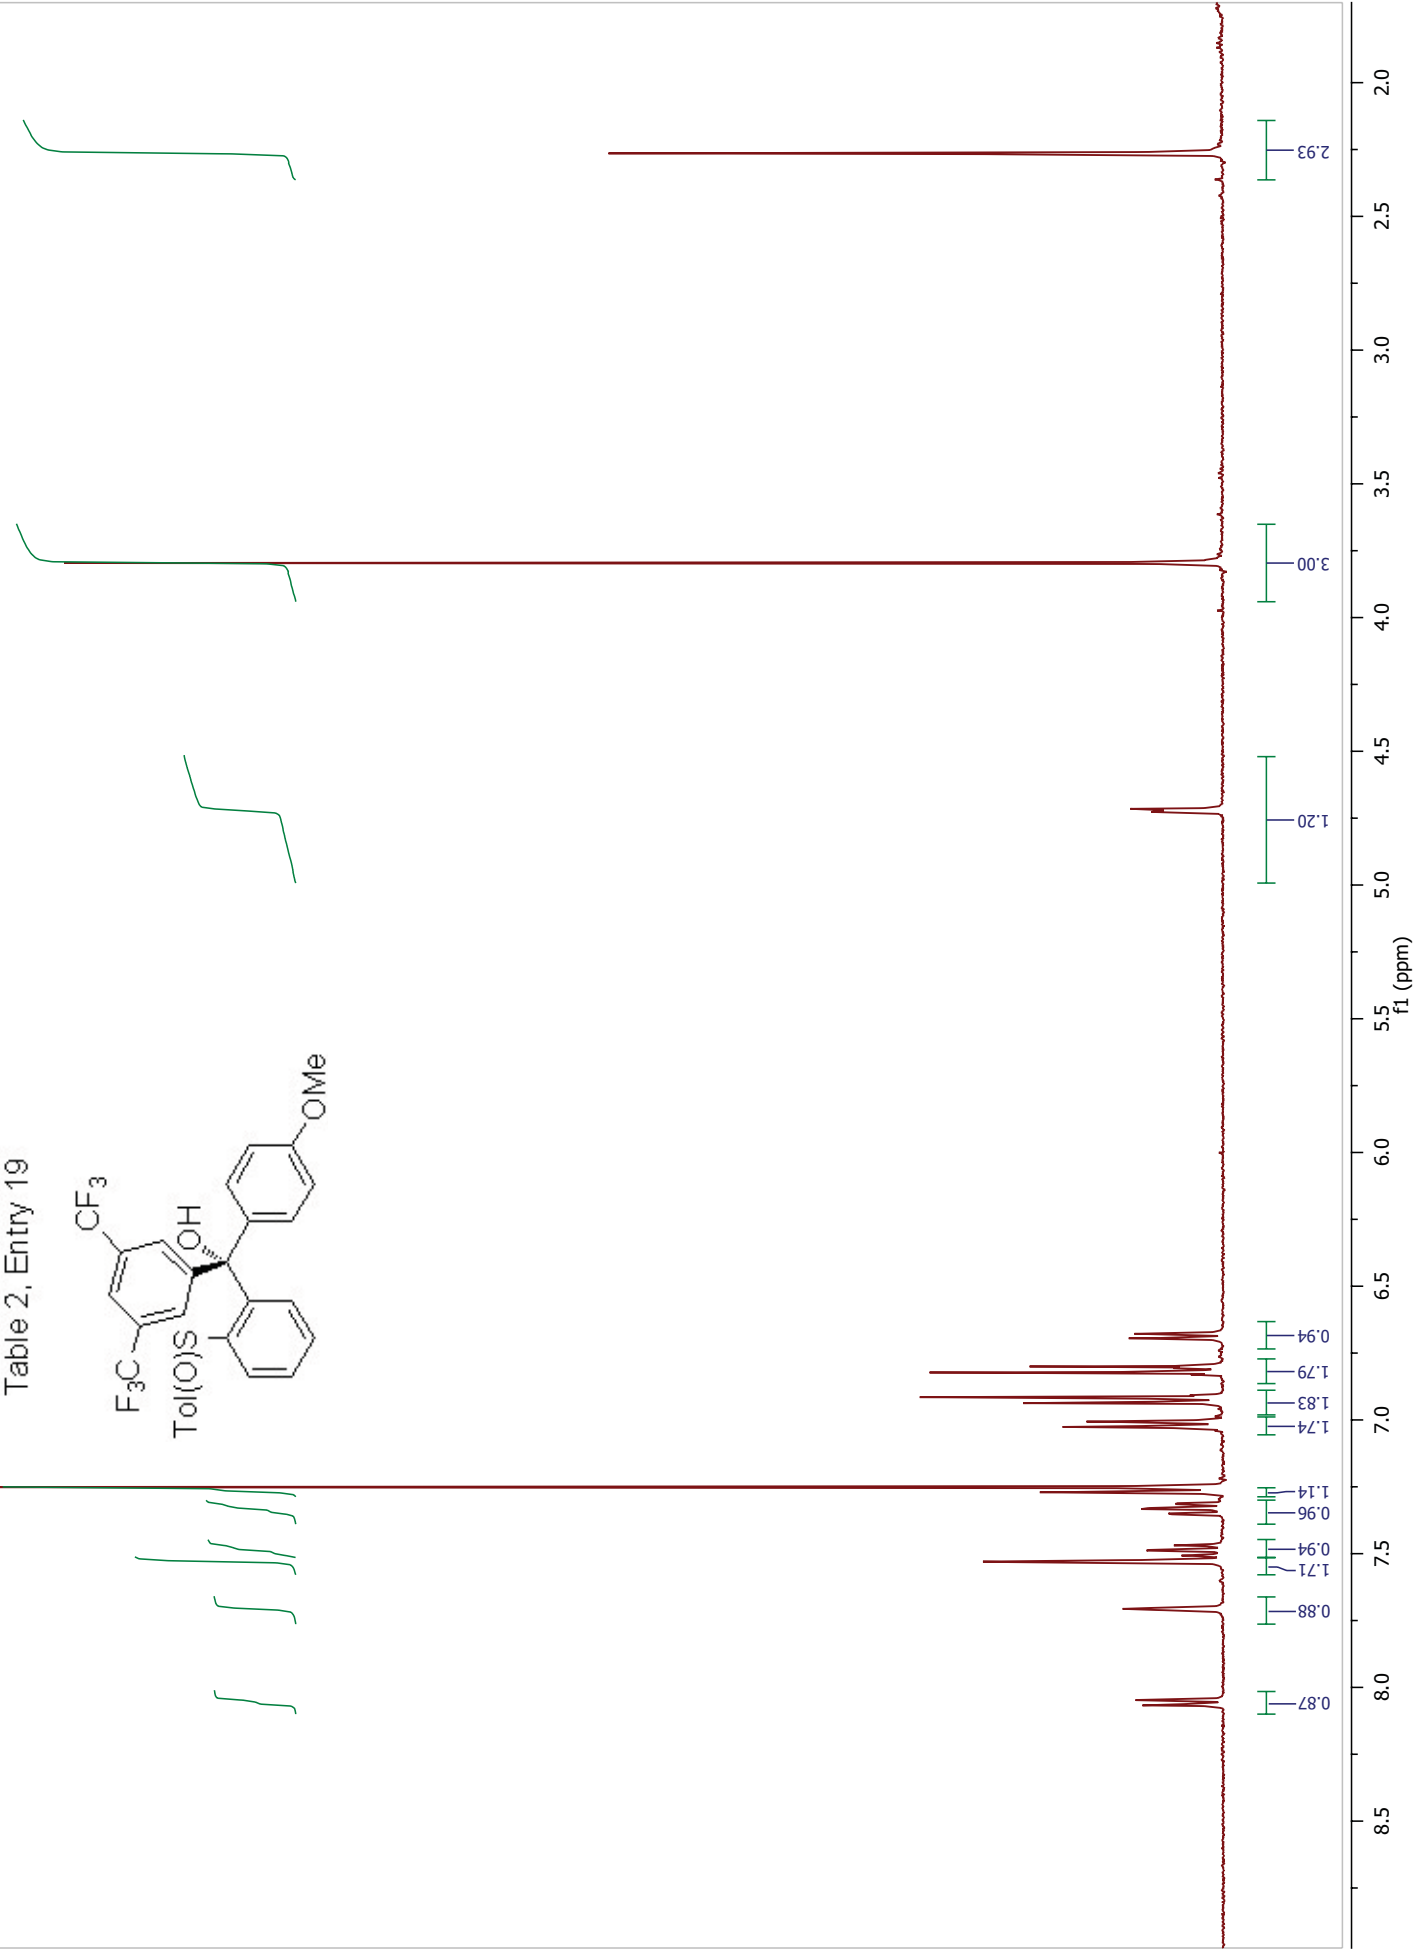

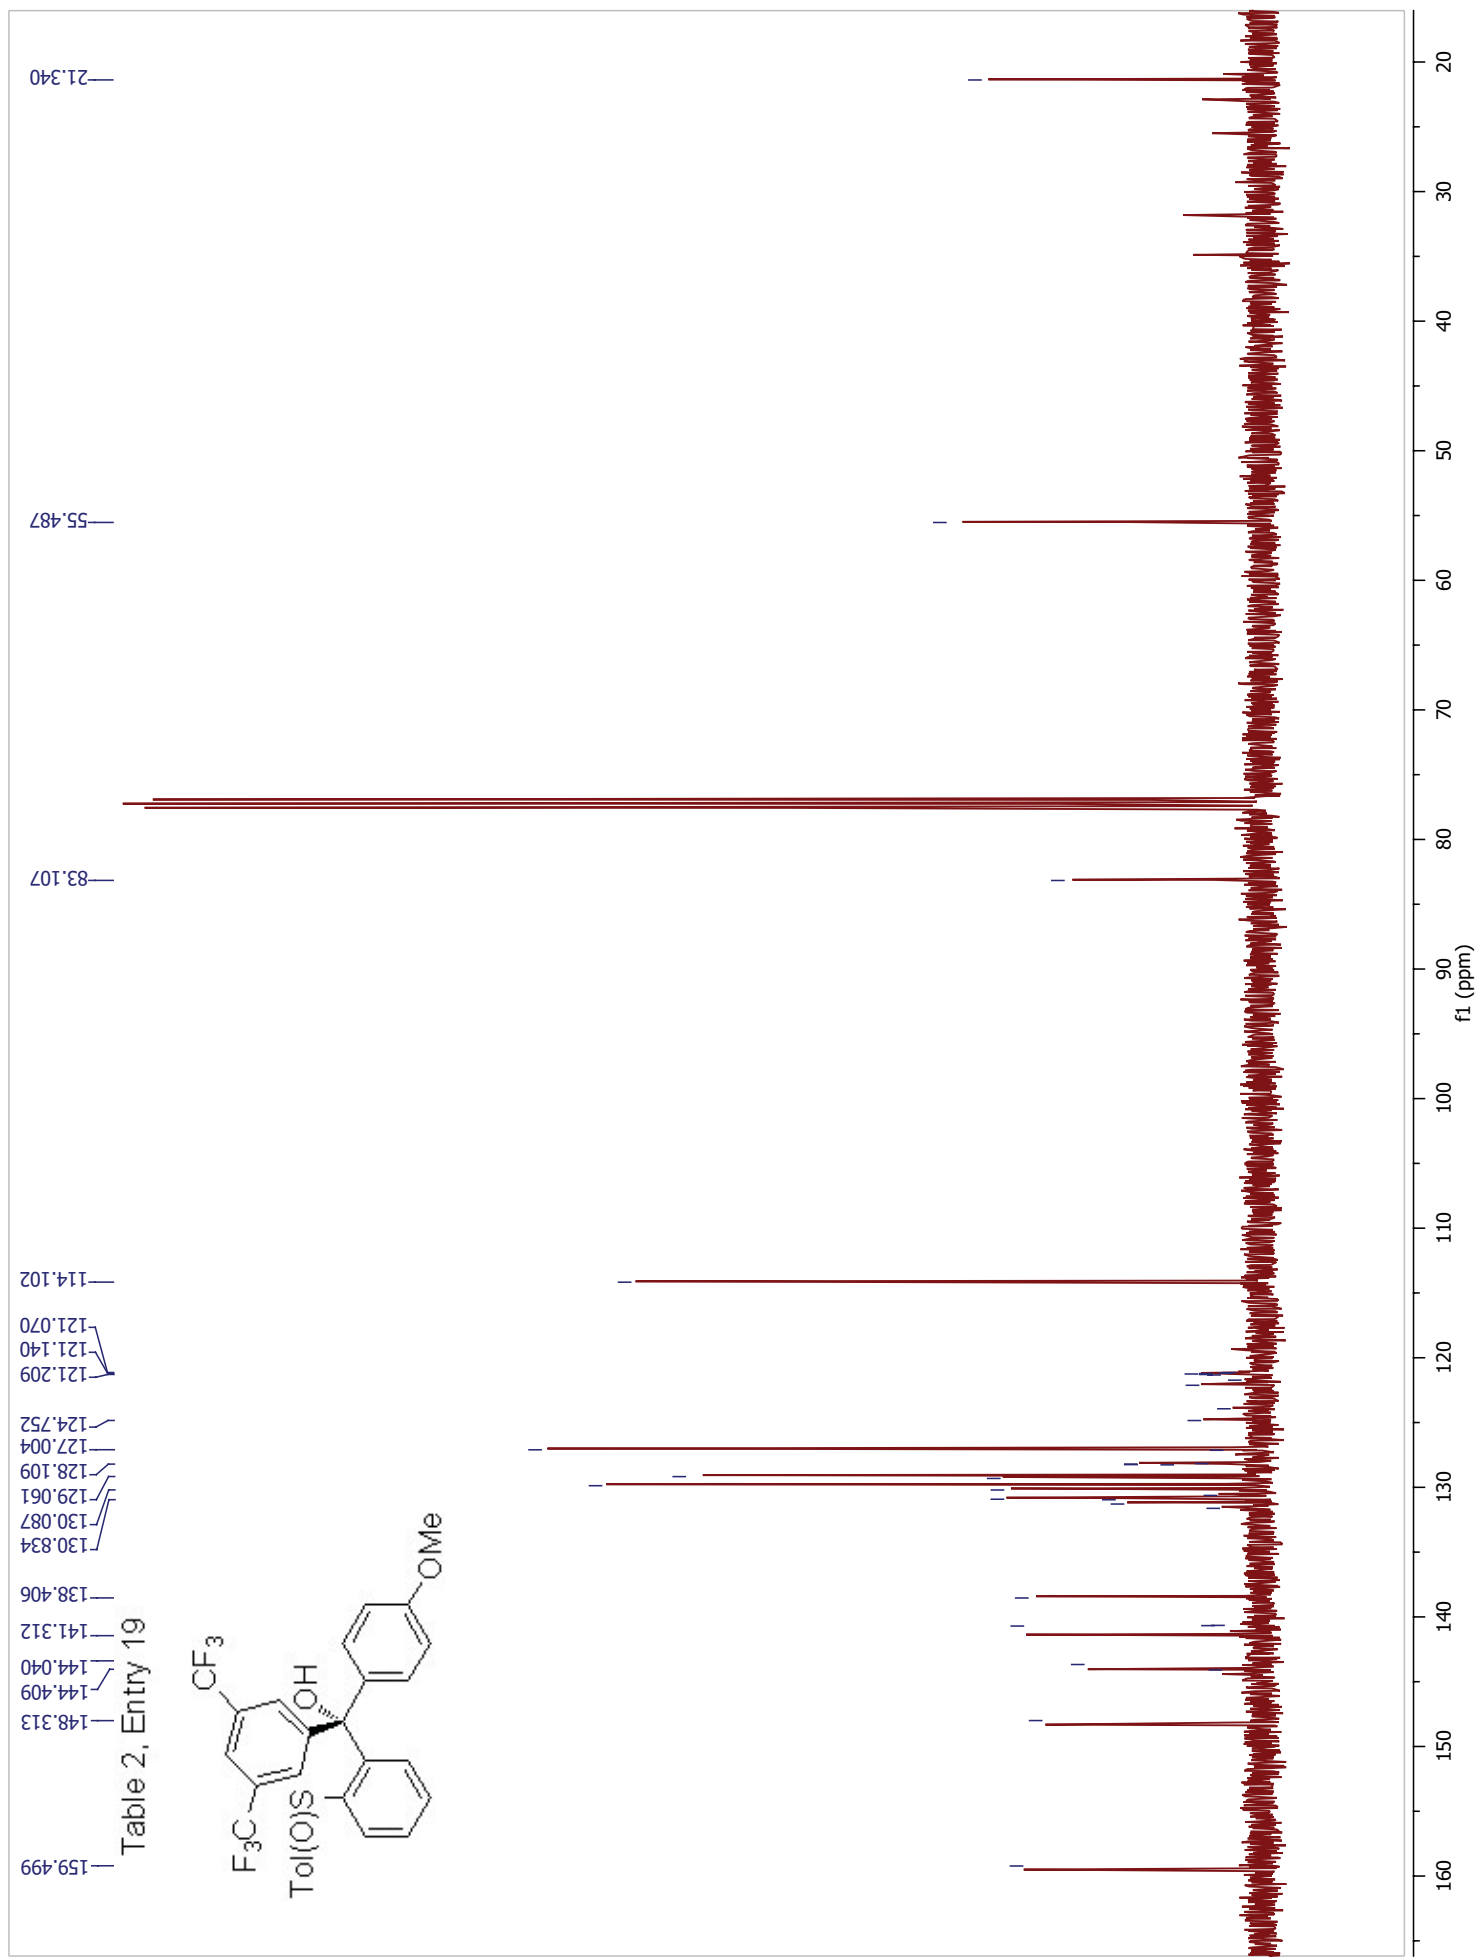

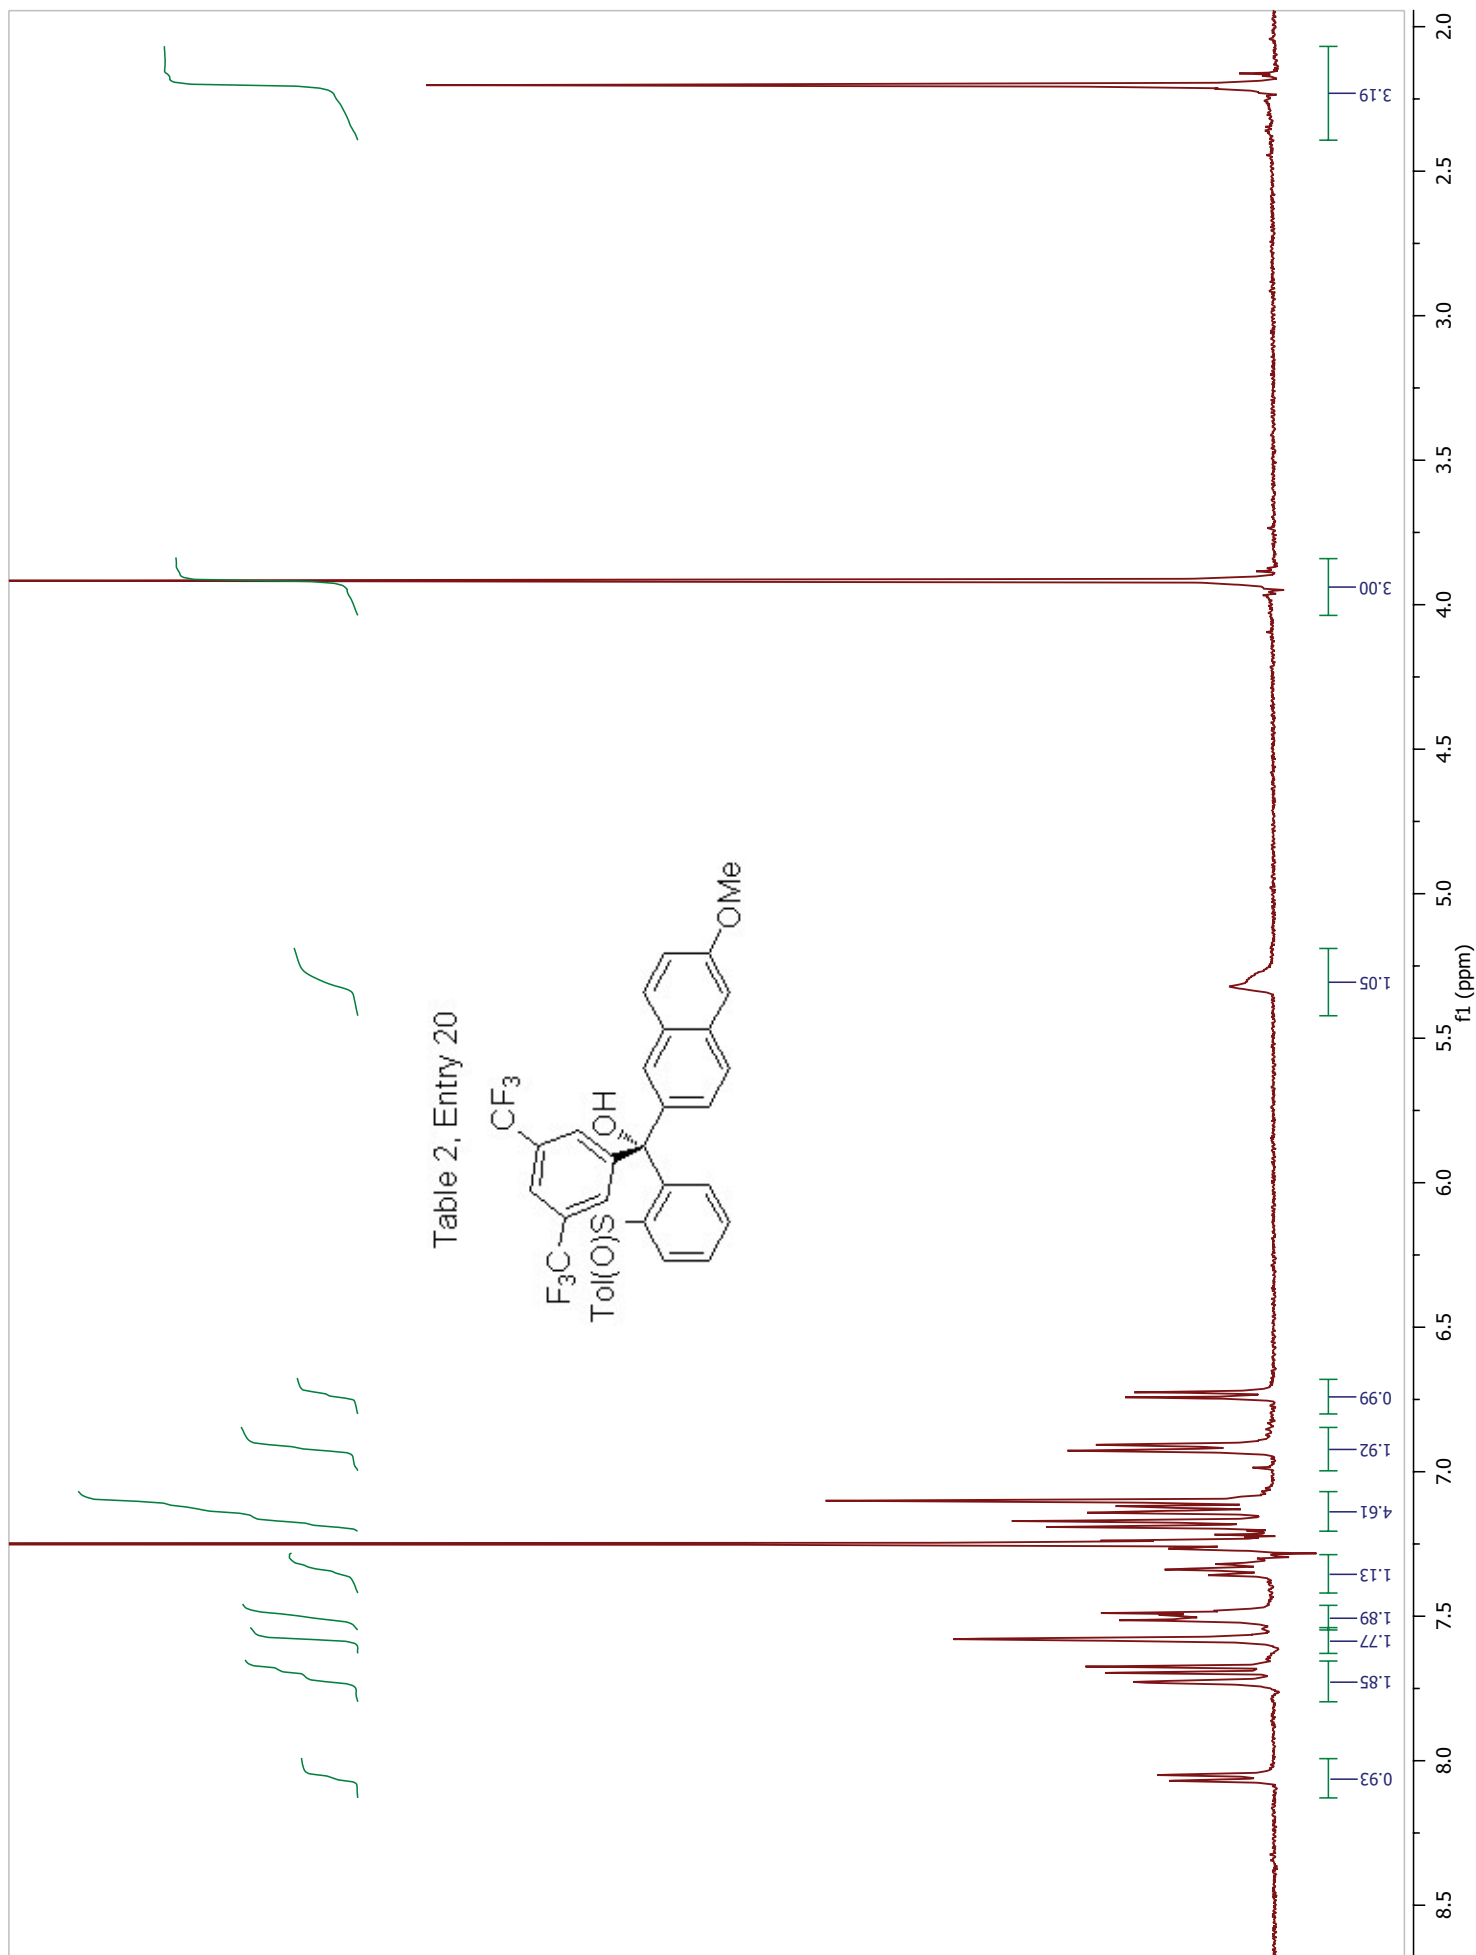

Table 2, Entry 20

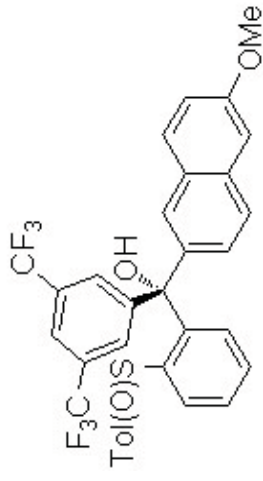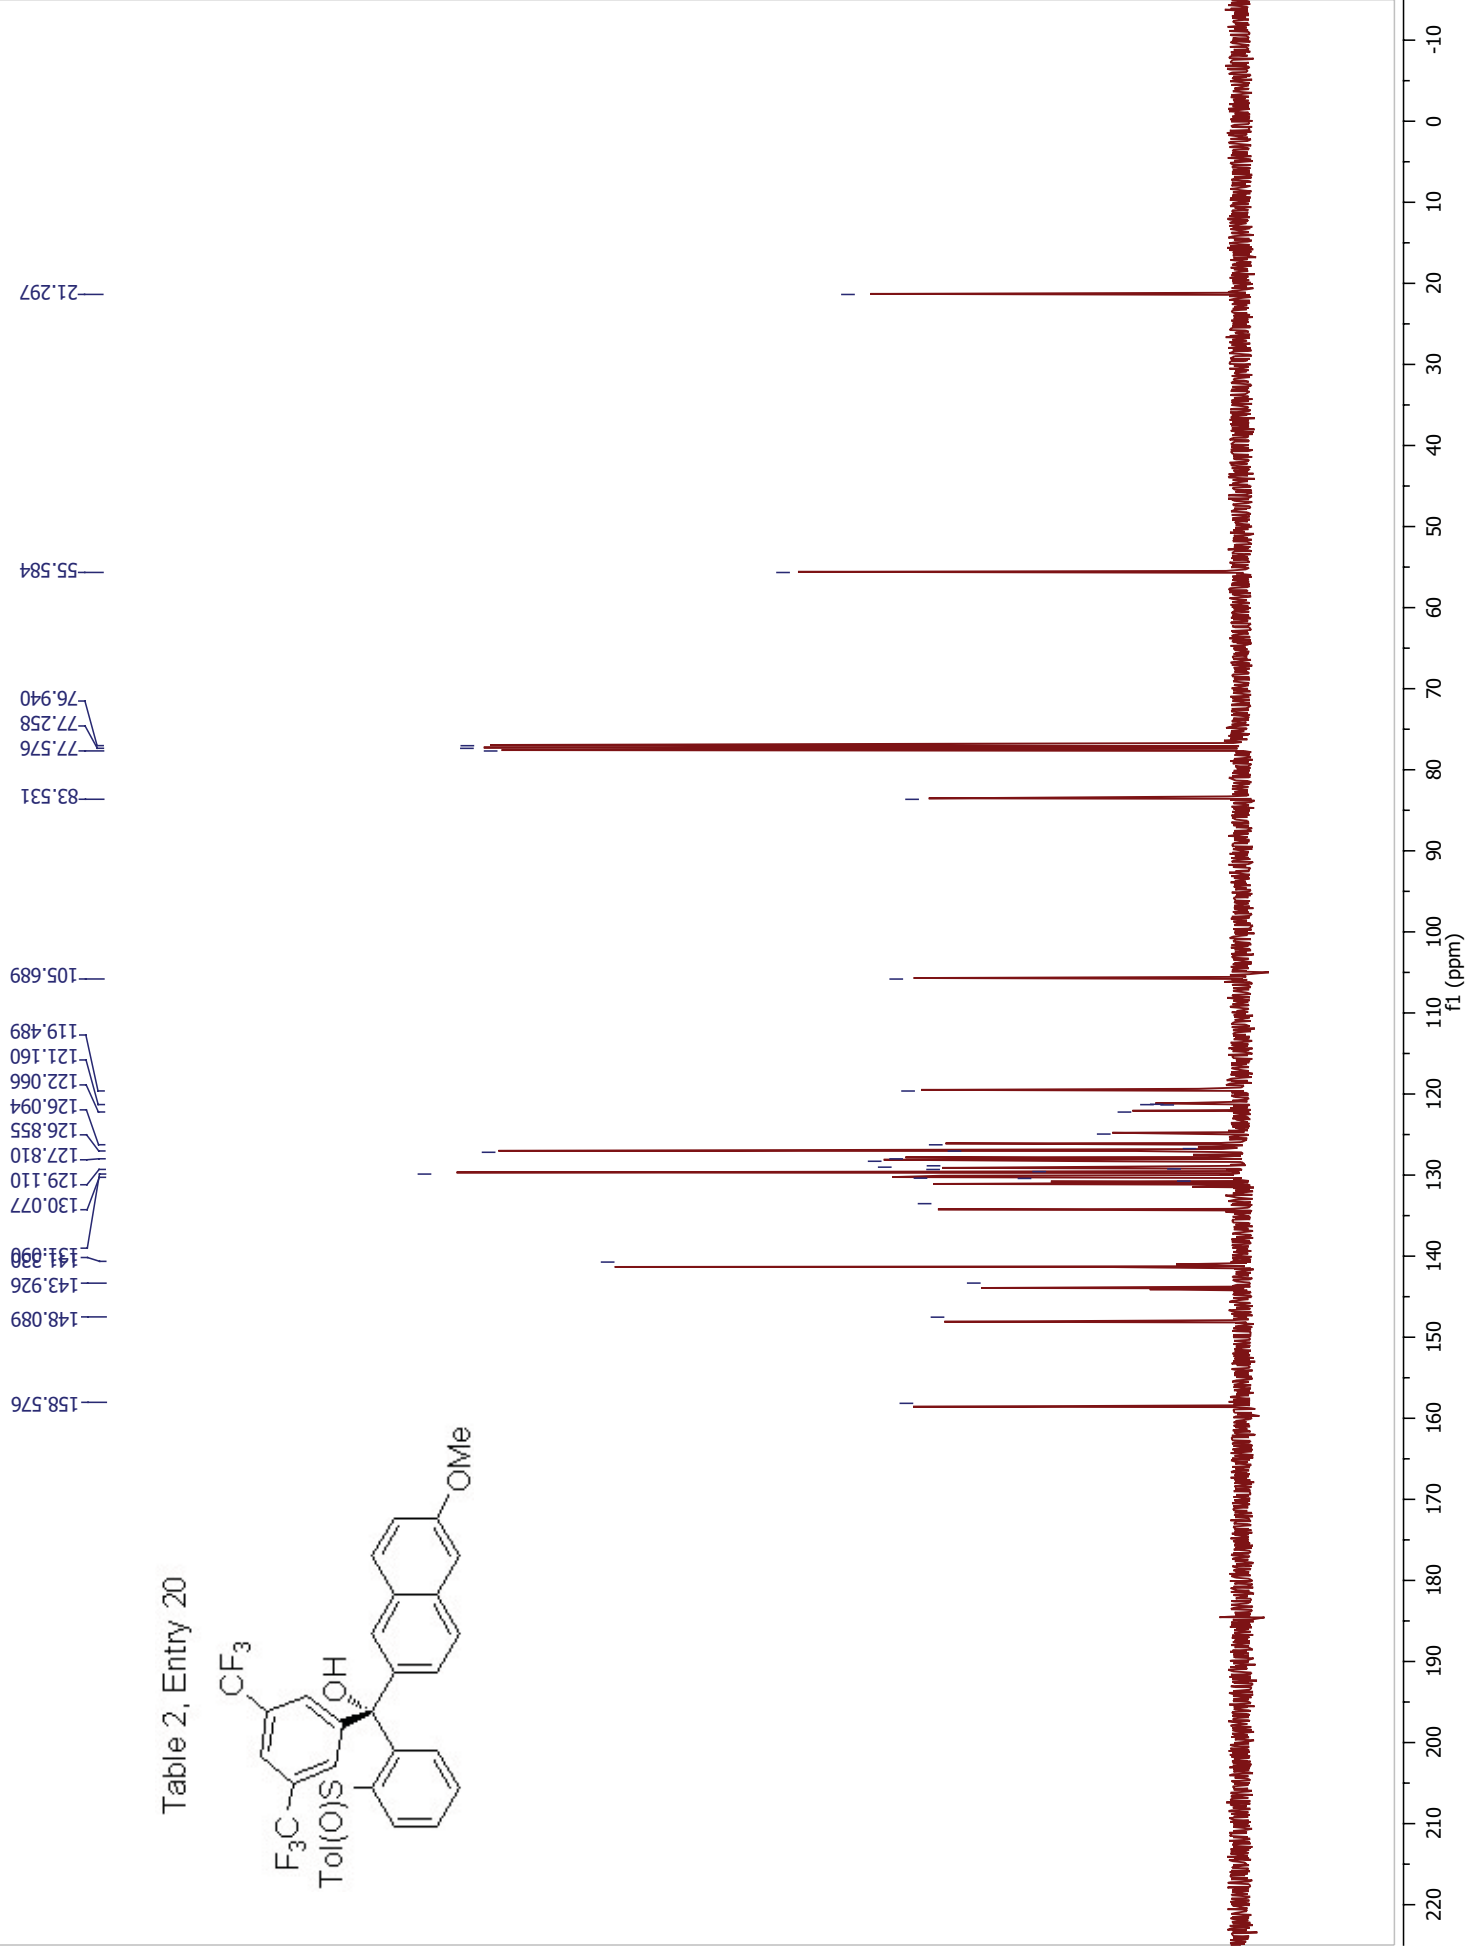

Table 2, Entry 21

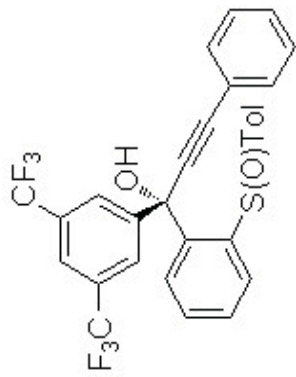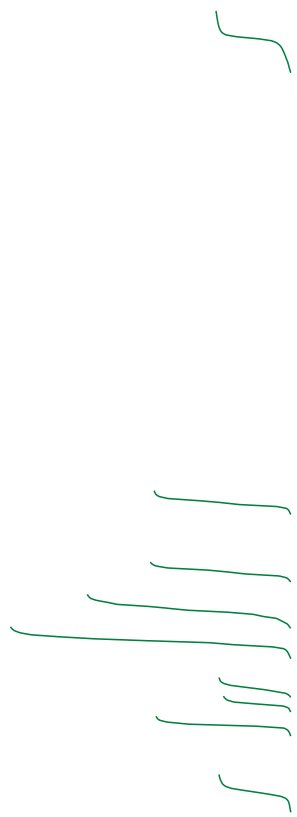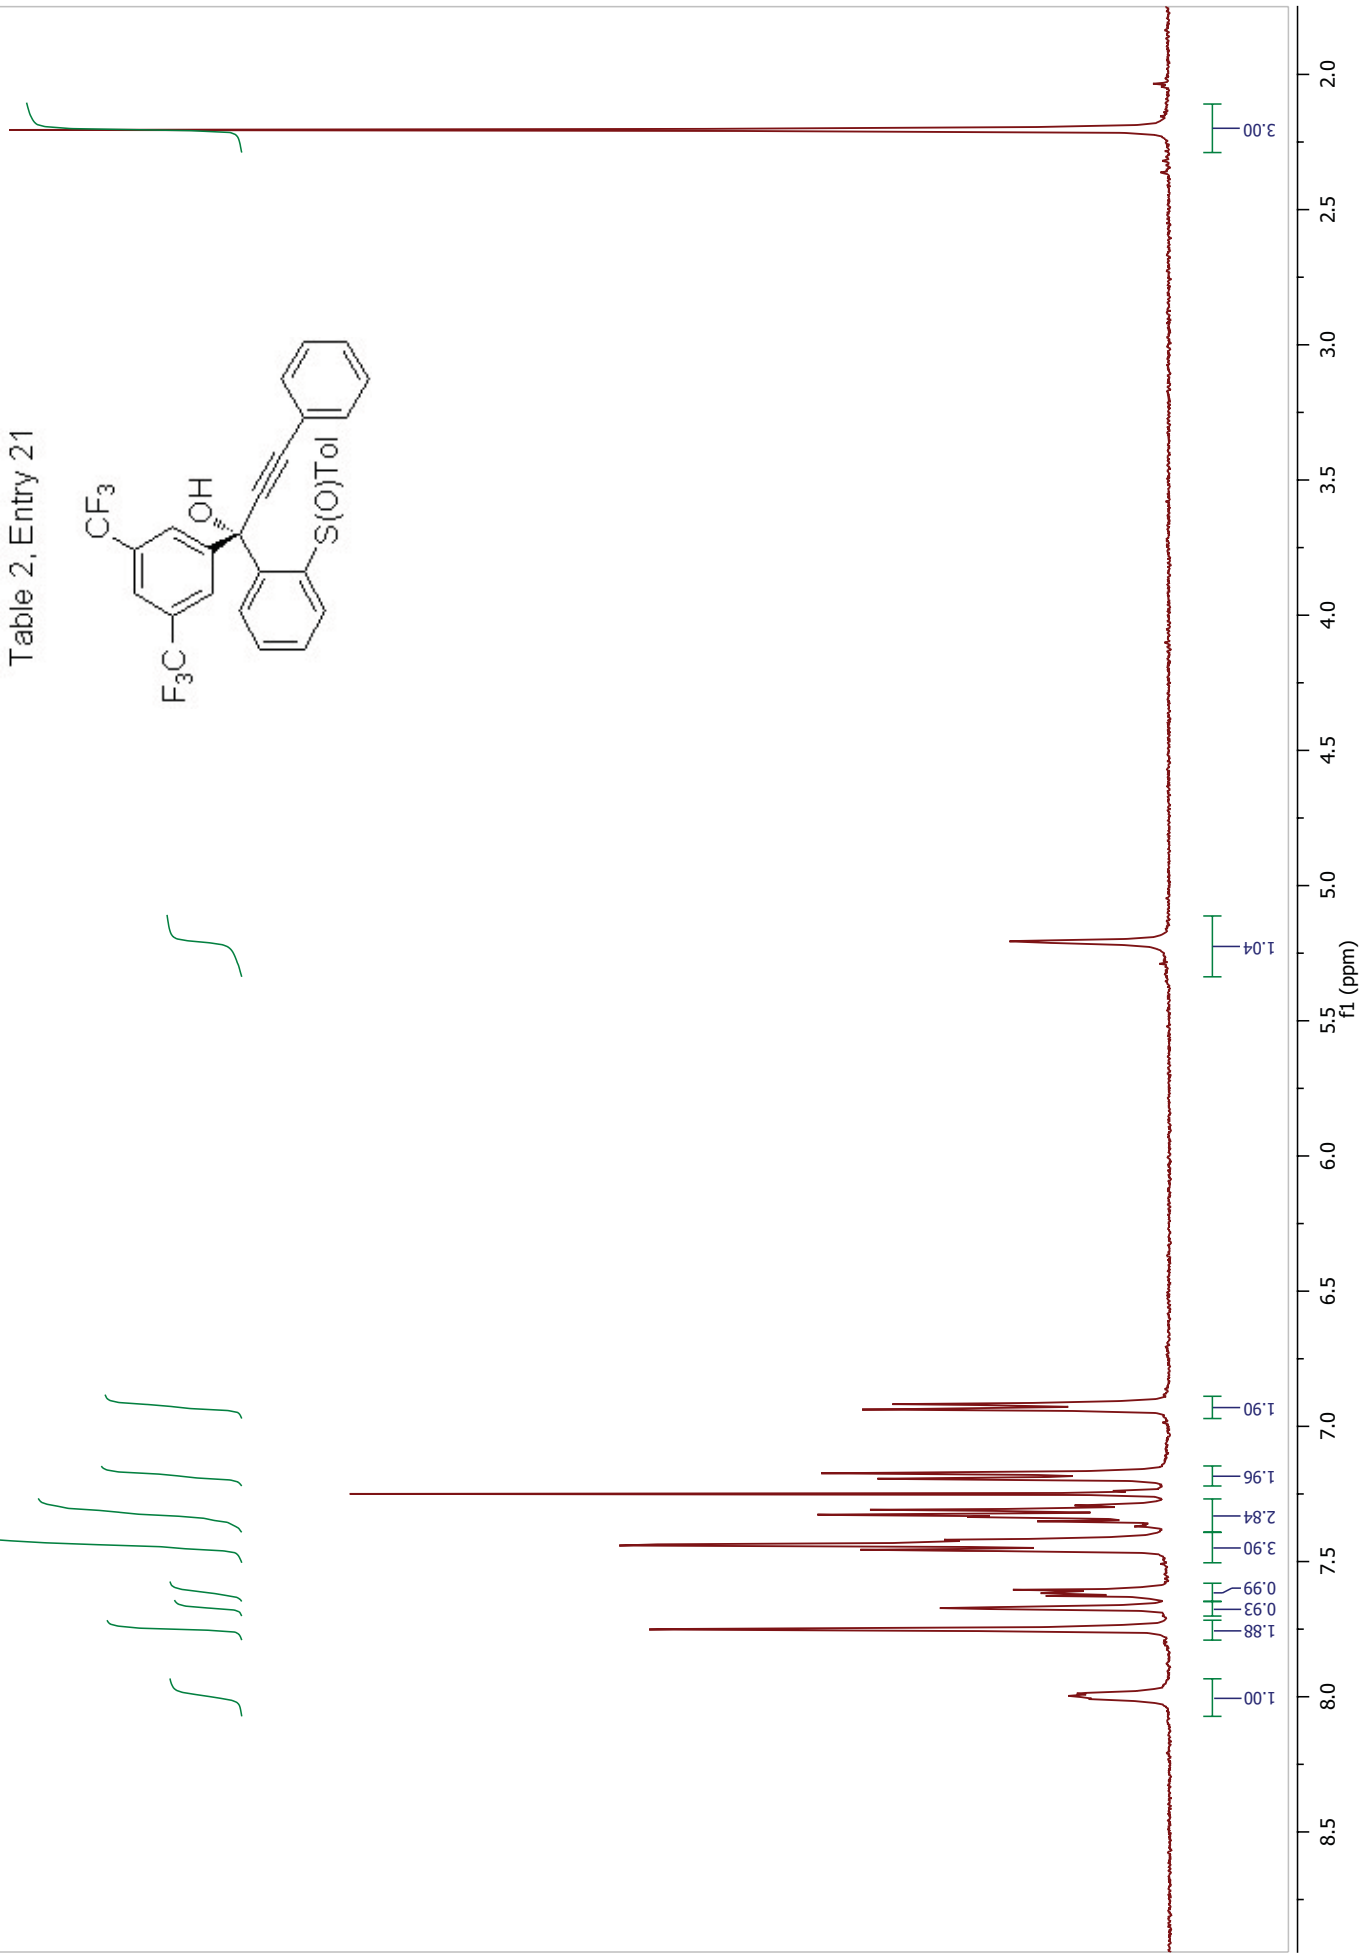



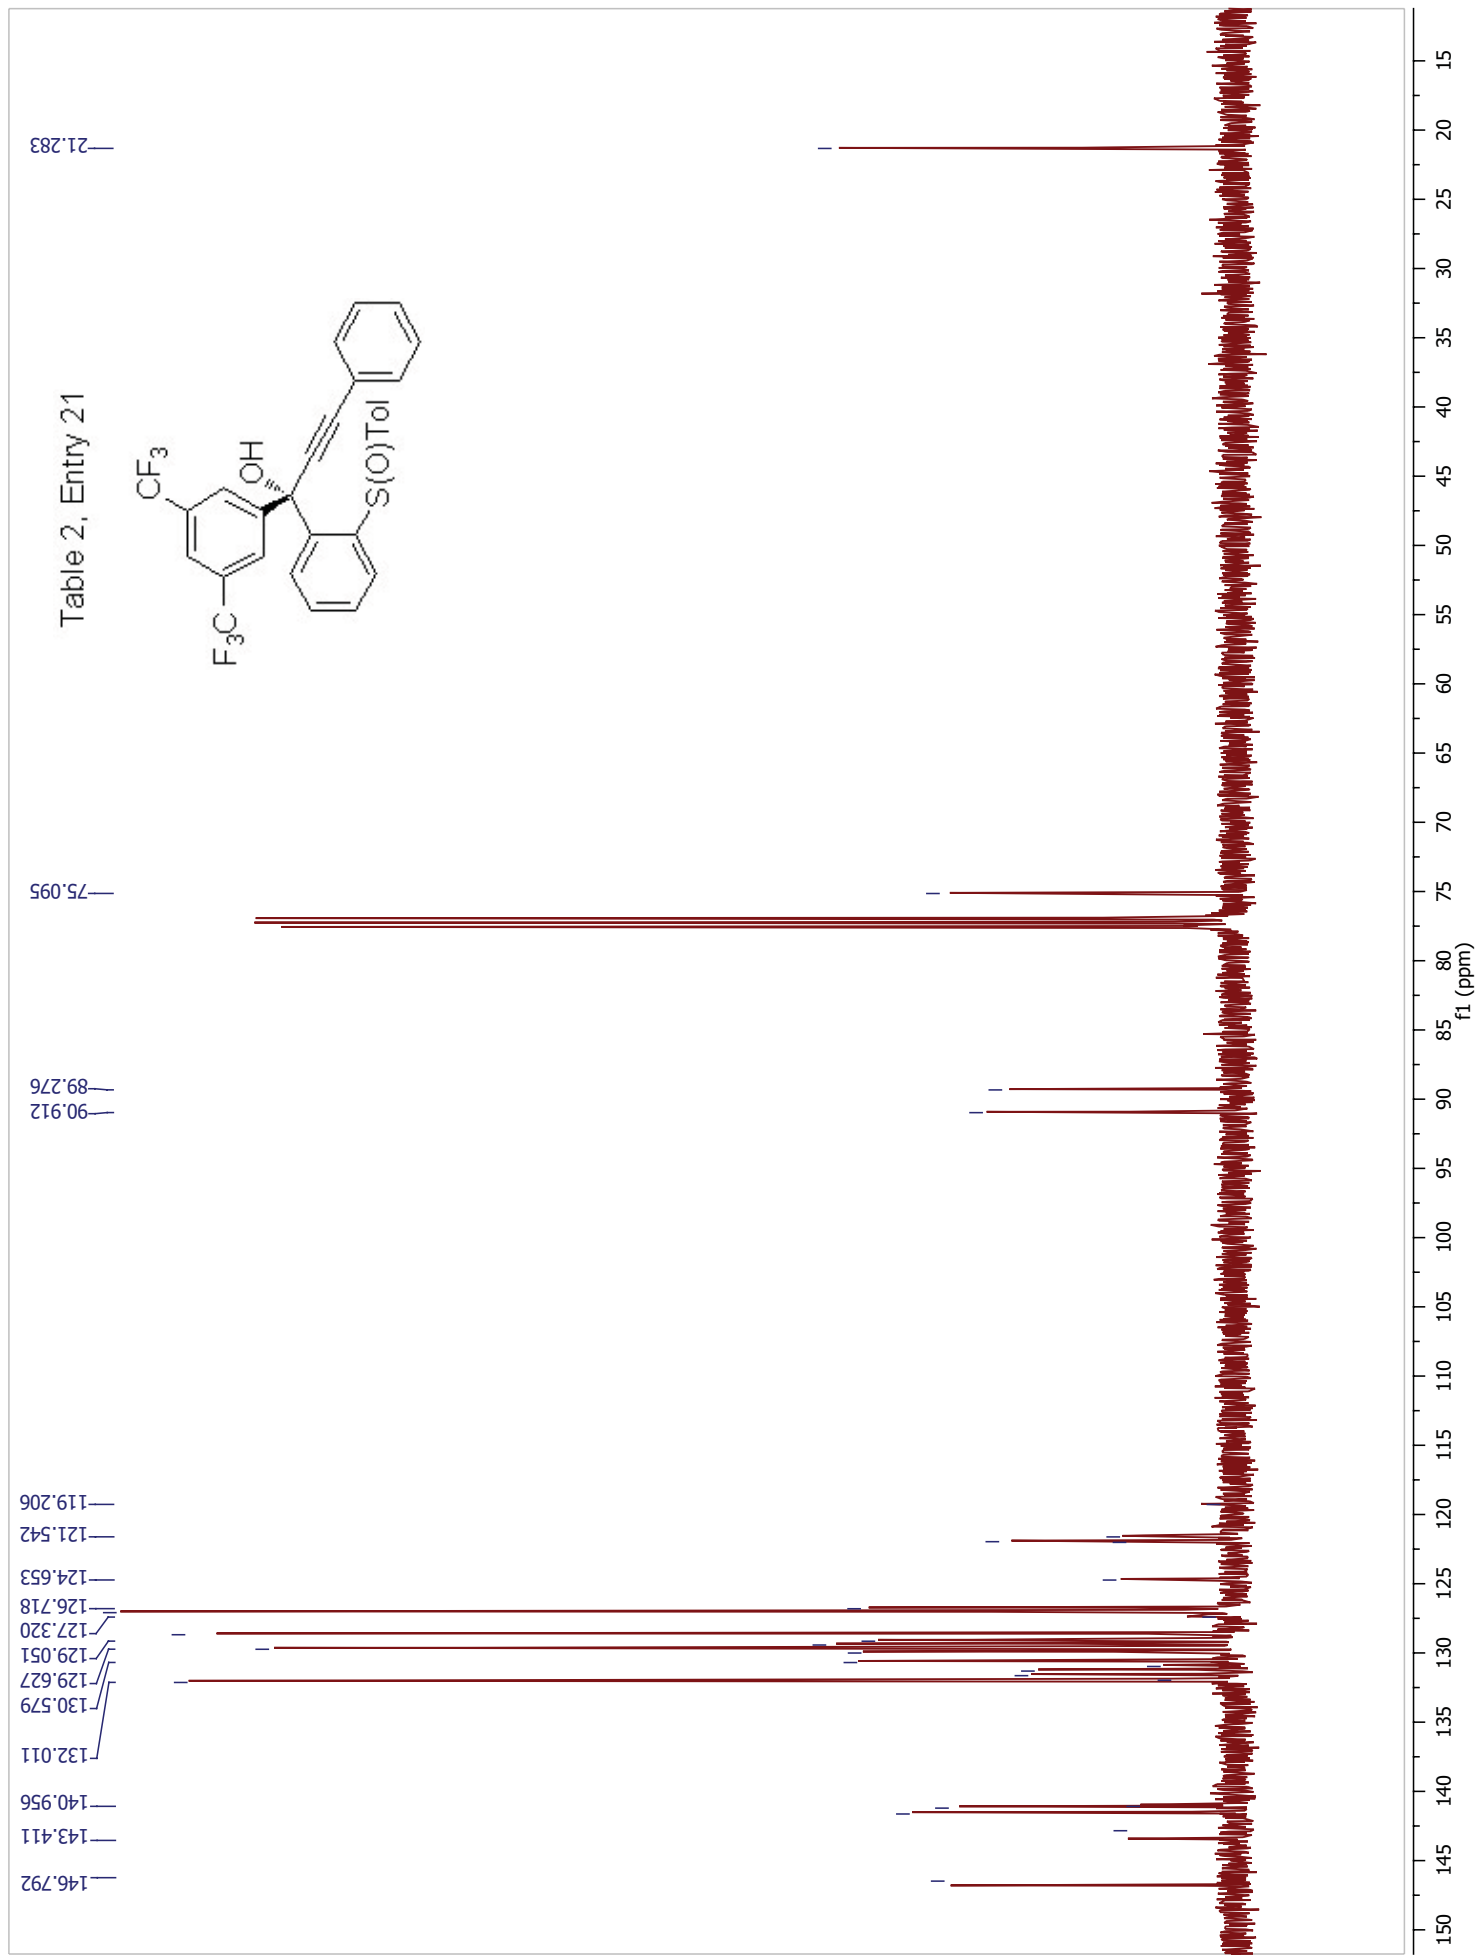

Table 1, Entry 22

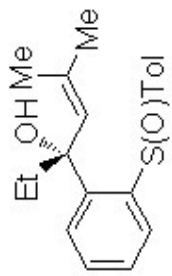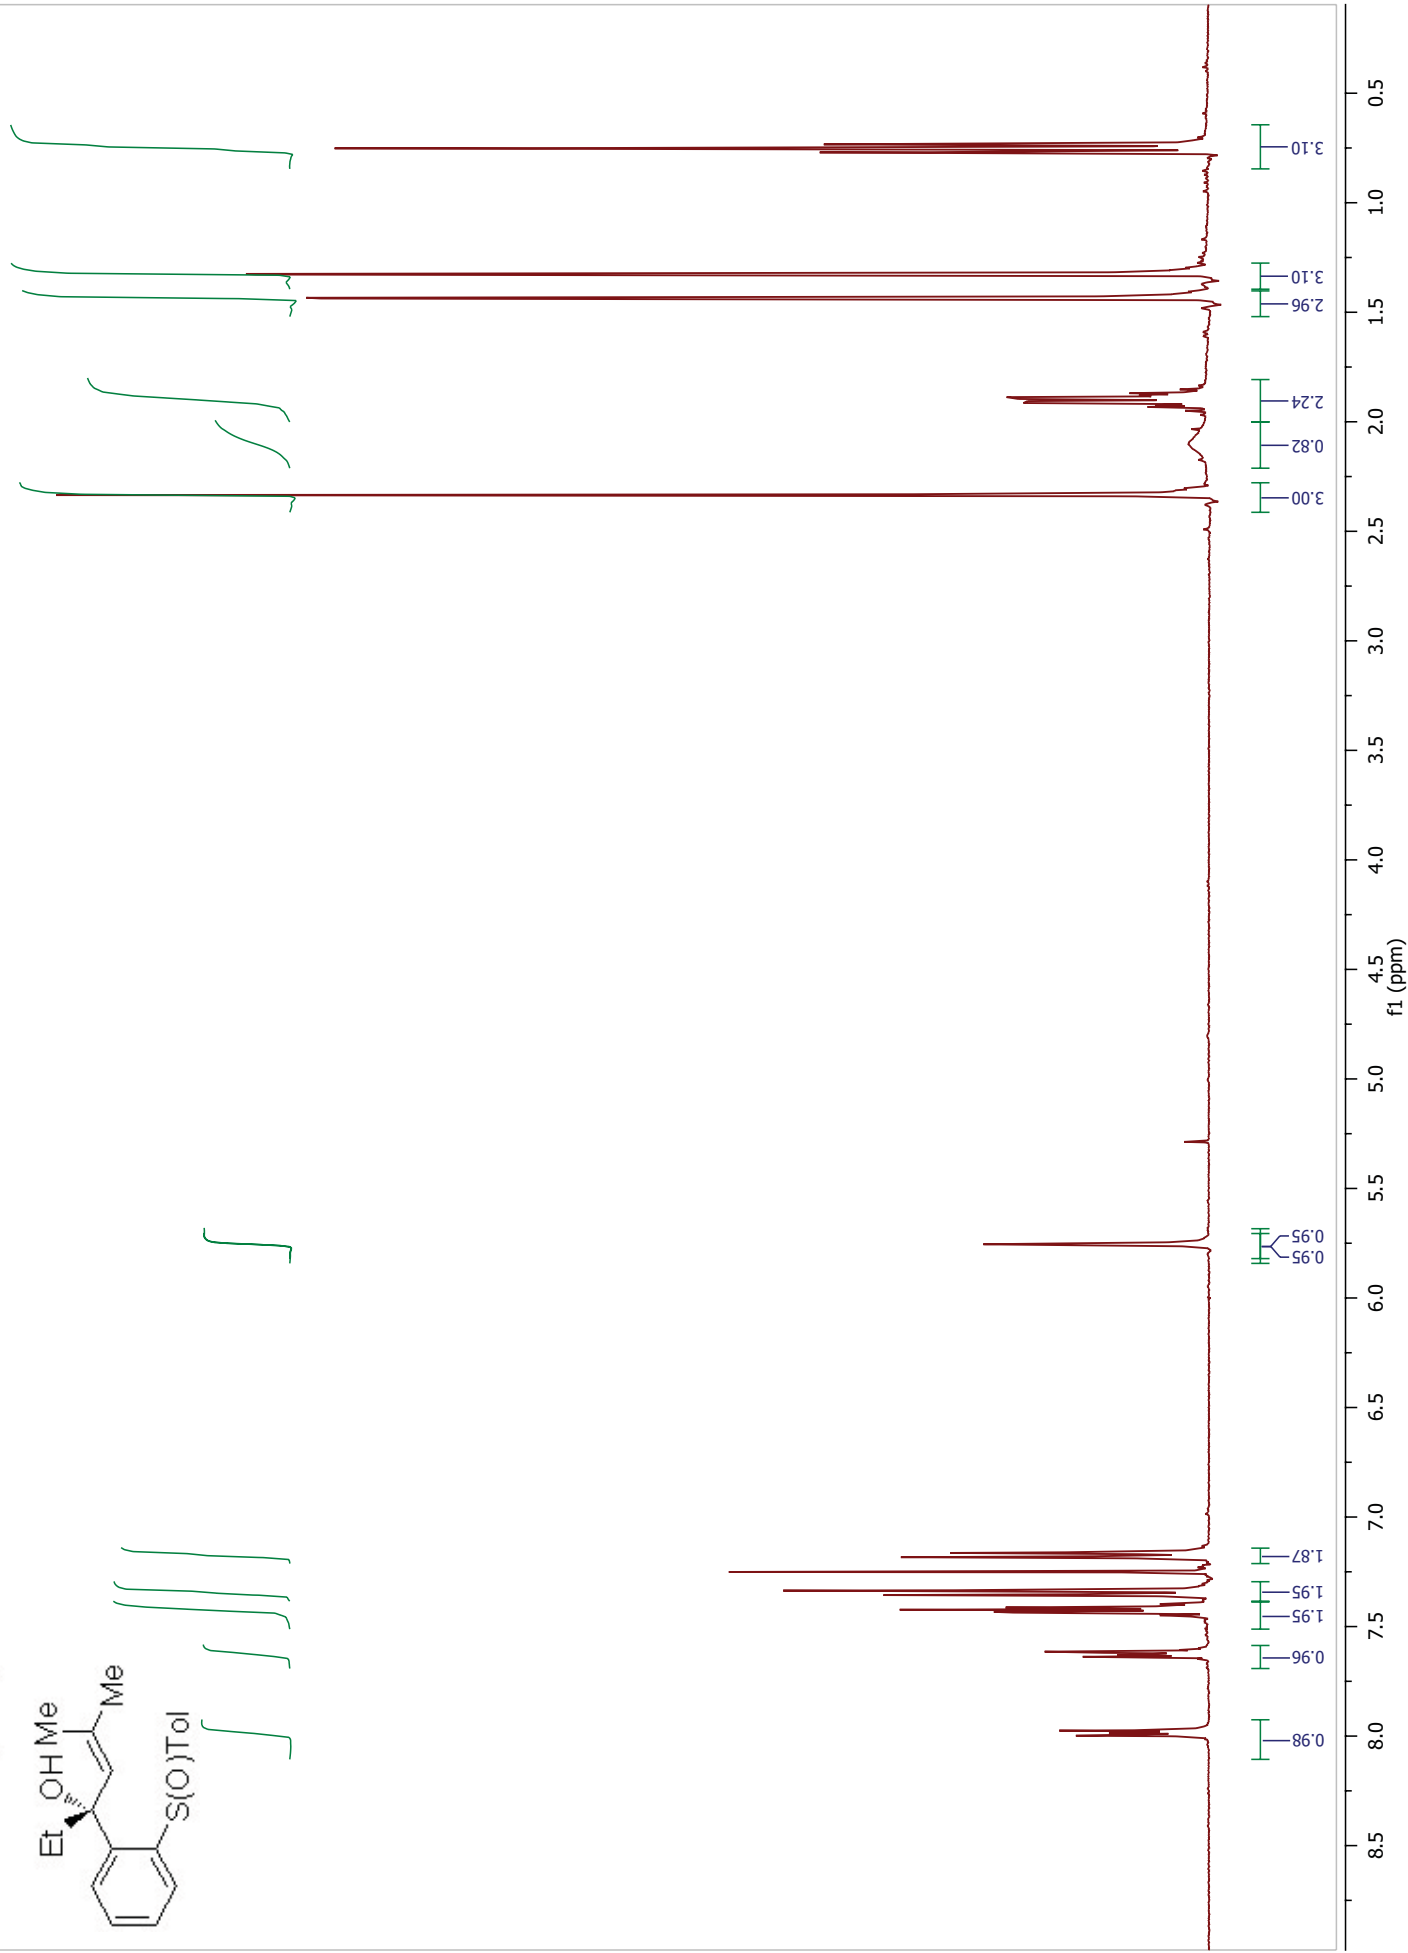

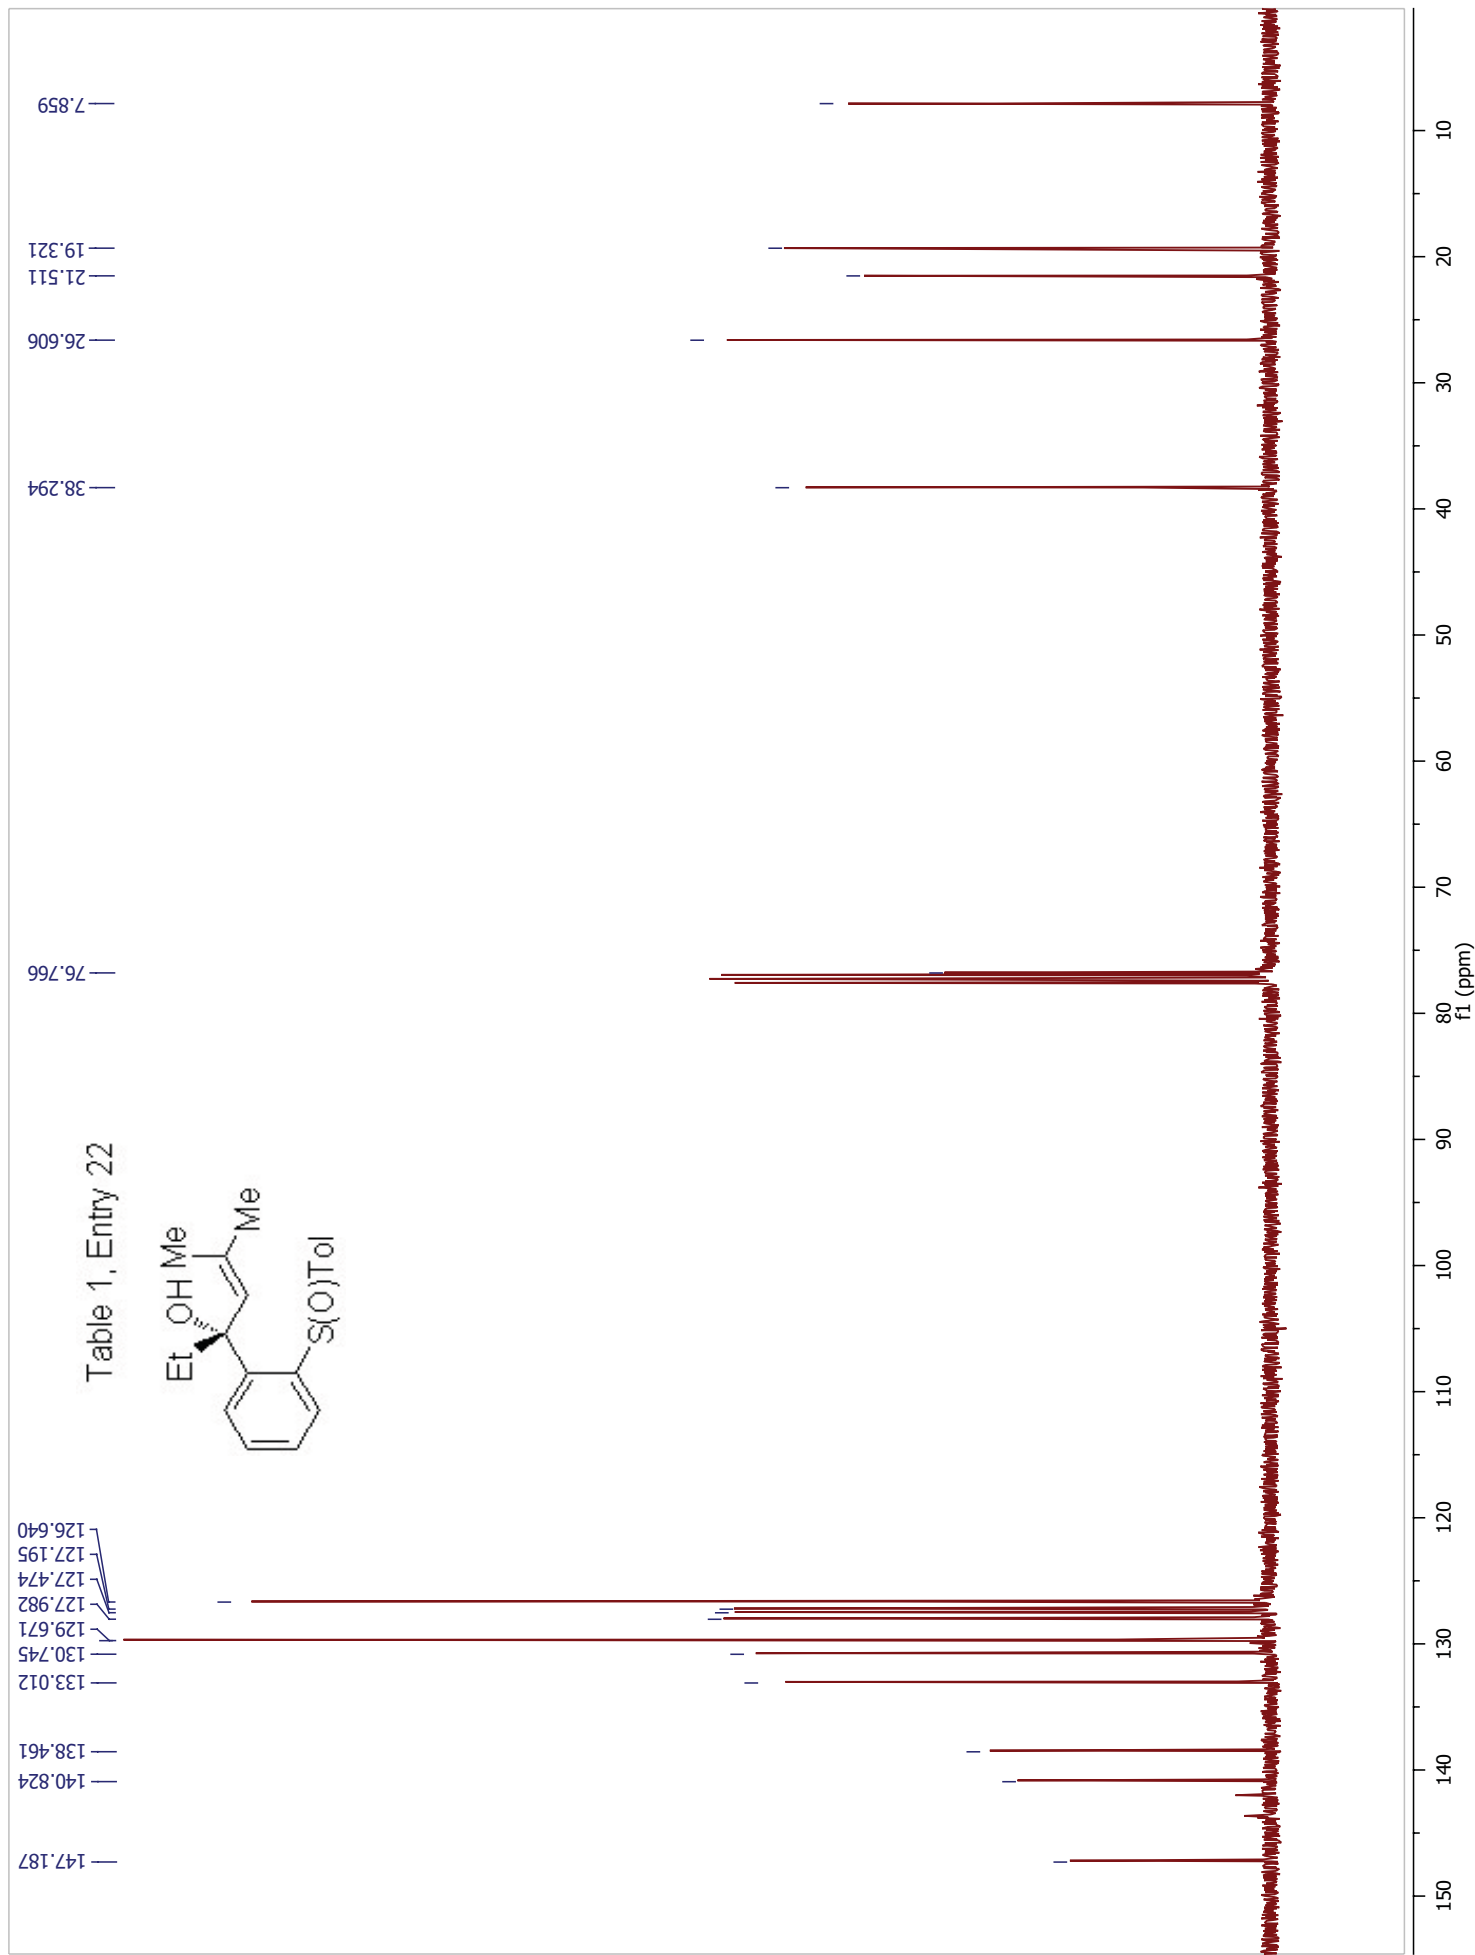

Table 2, Entry 23

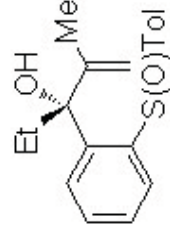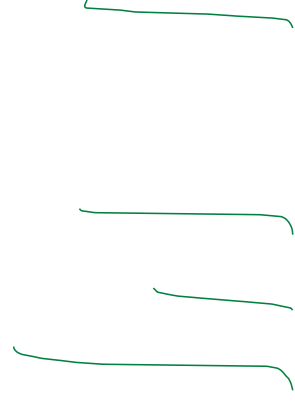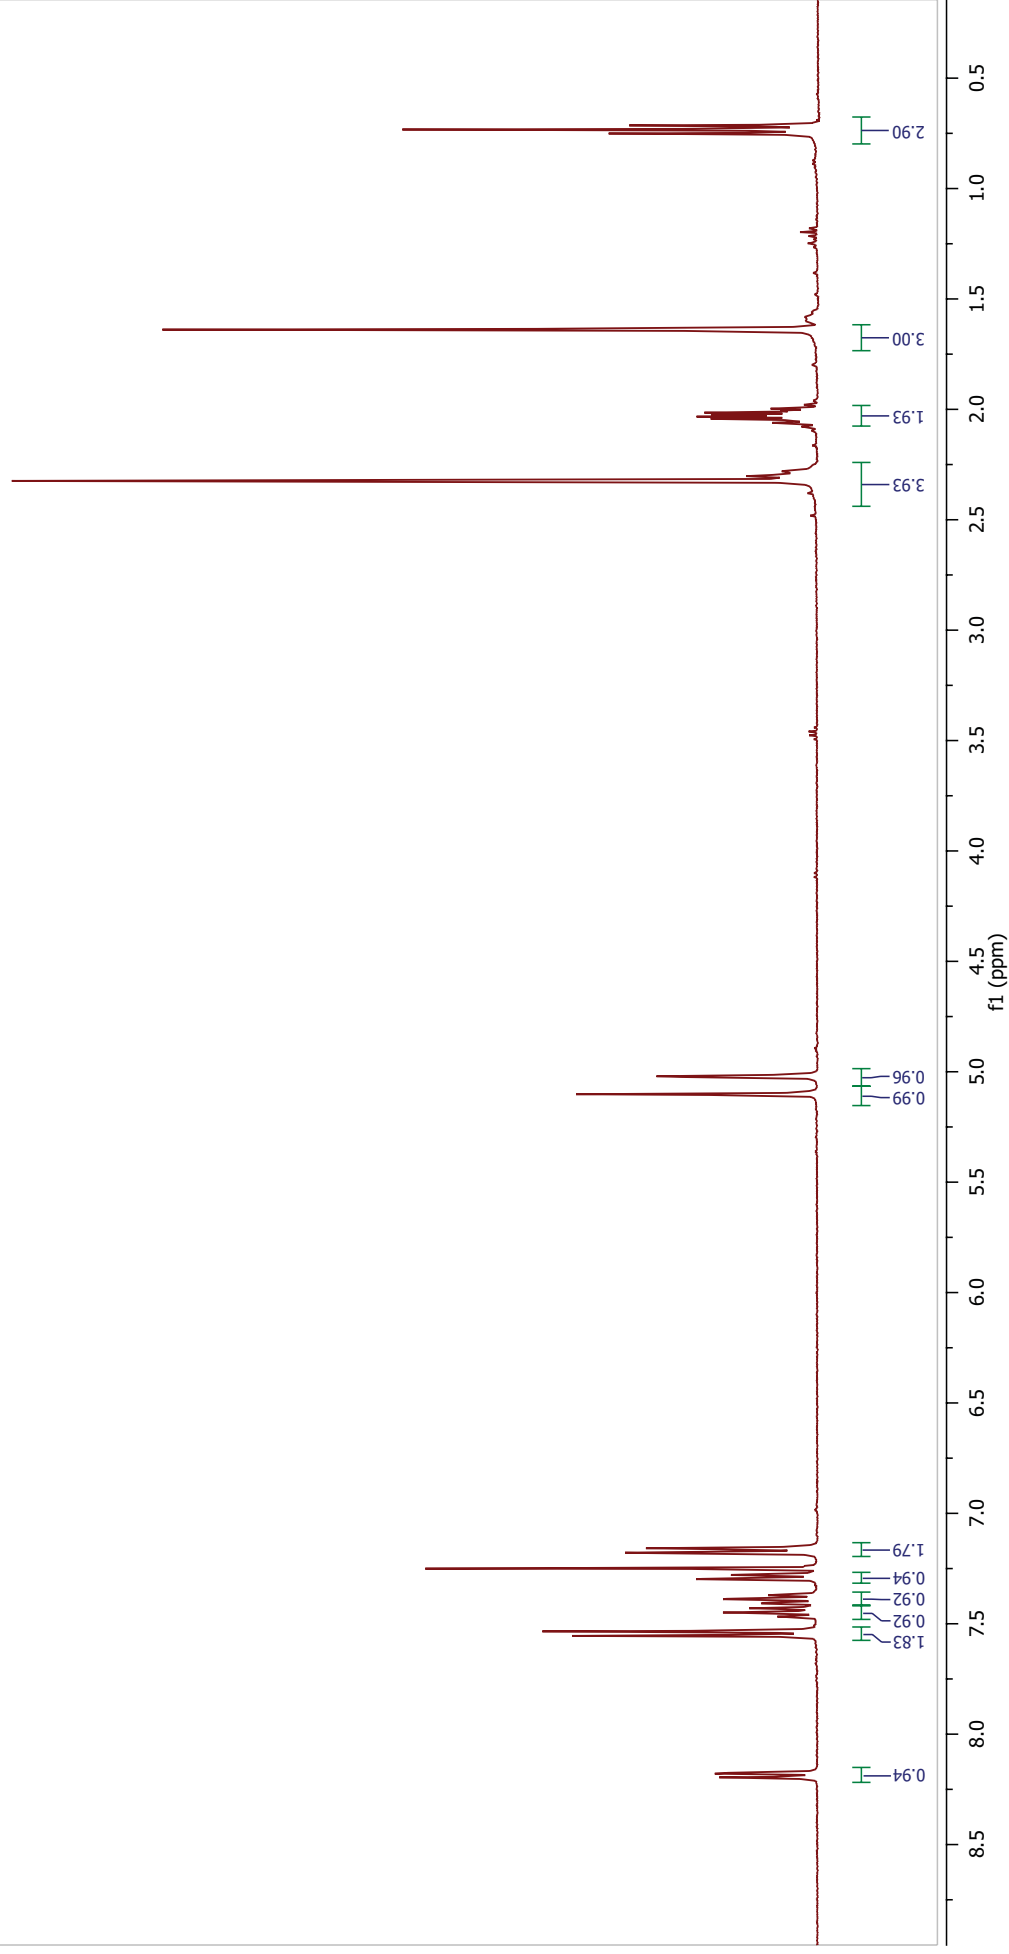

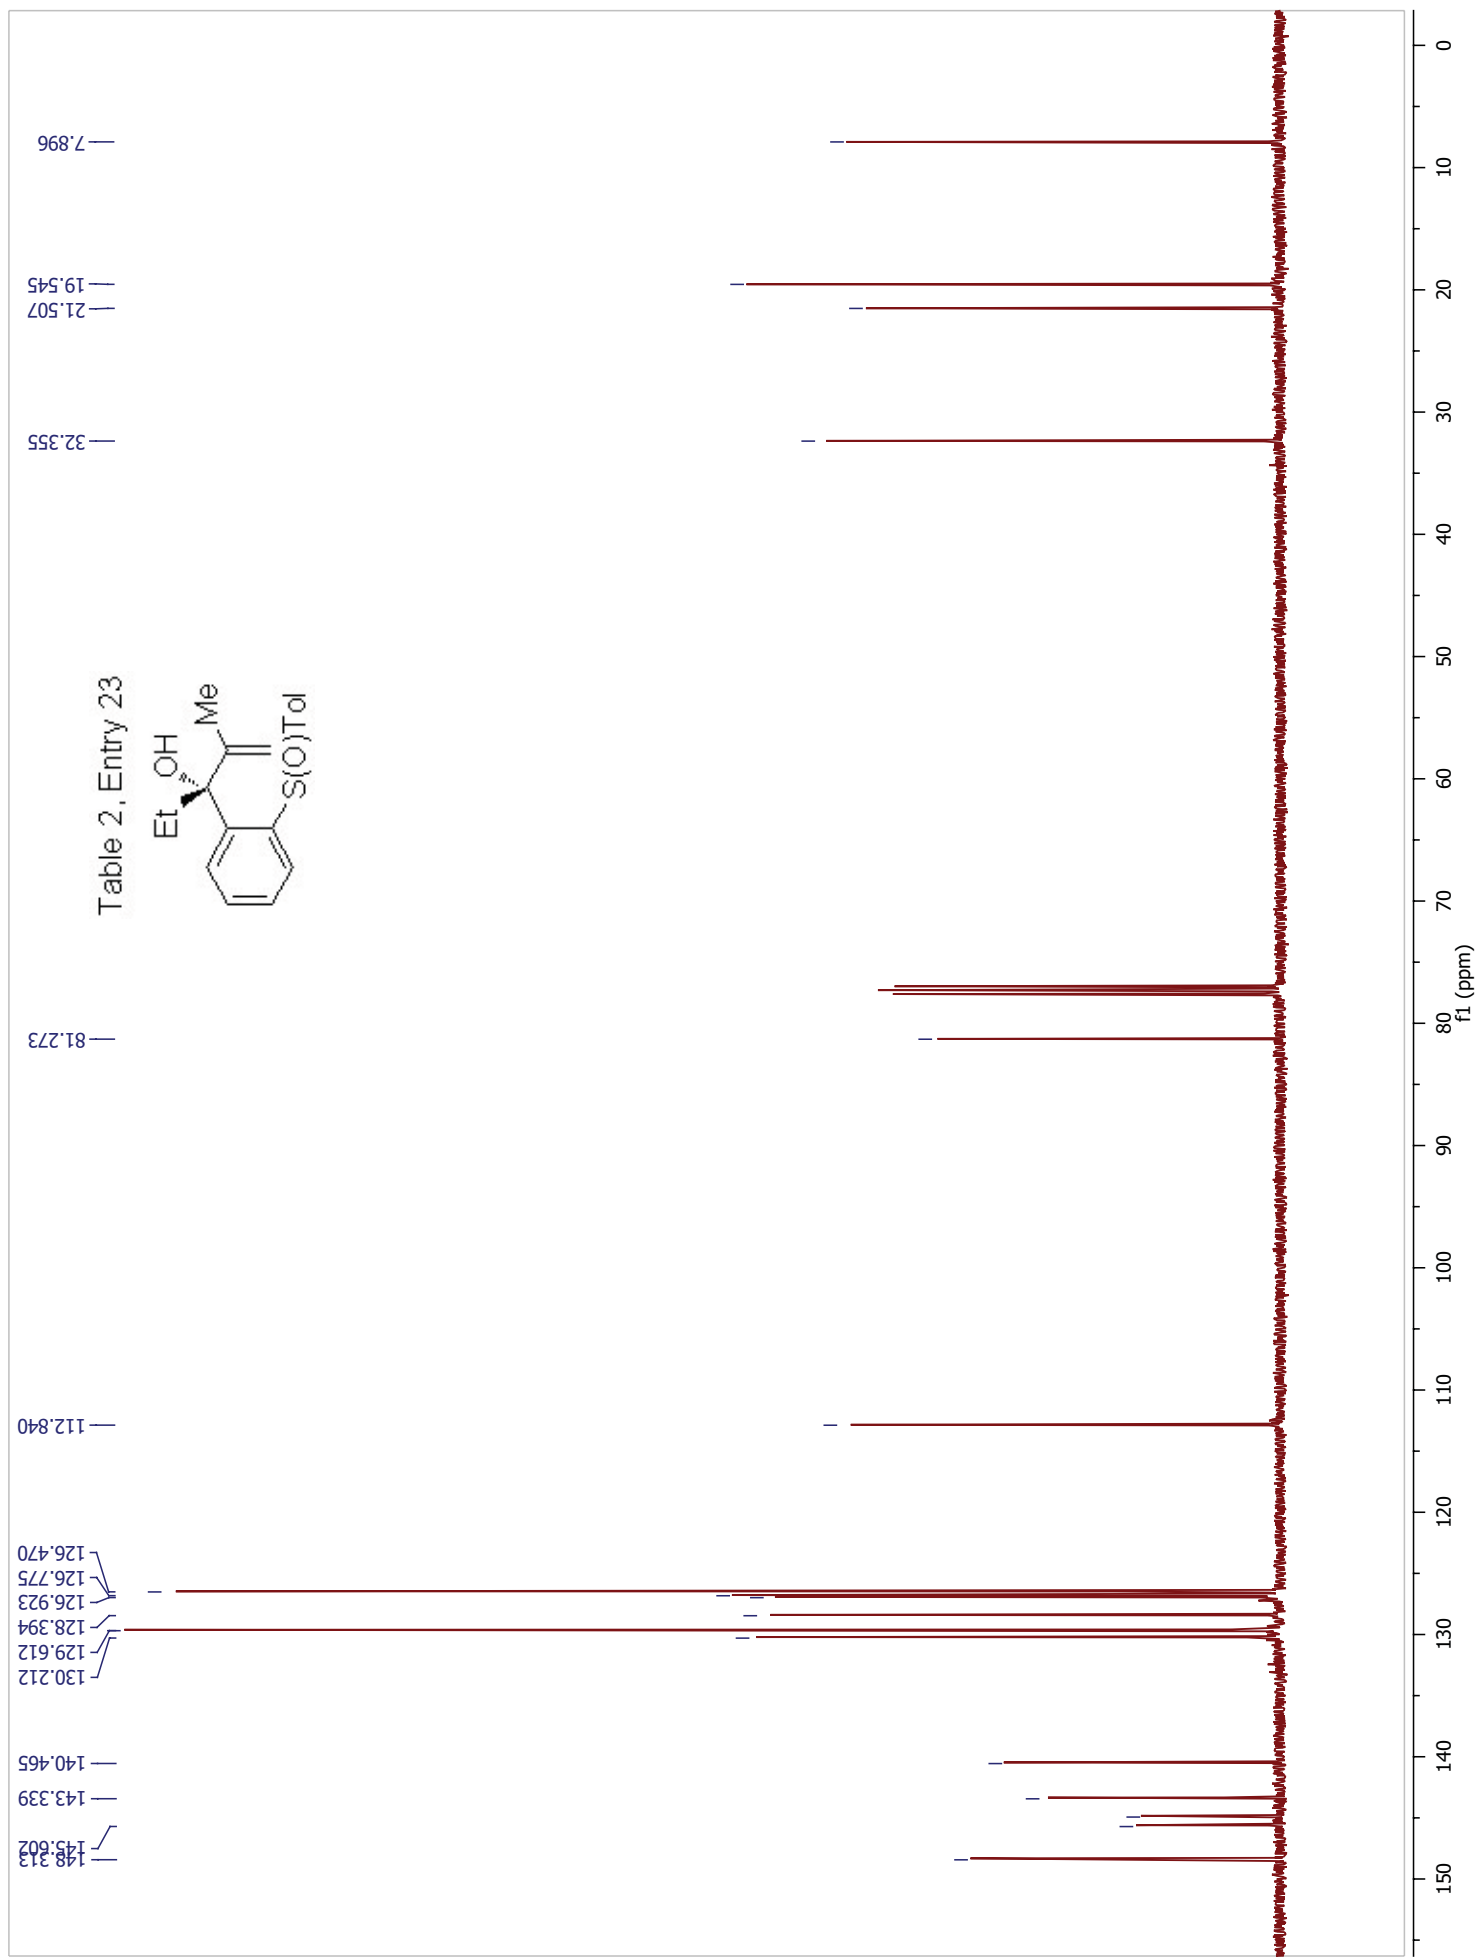

Table 2, Entry 24

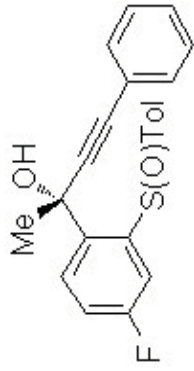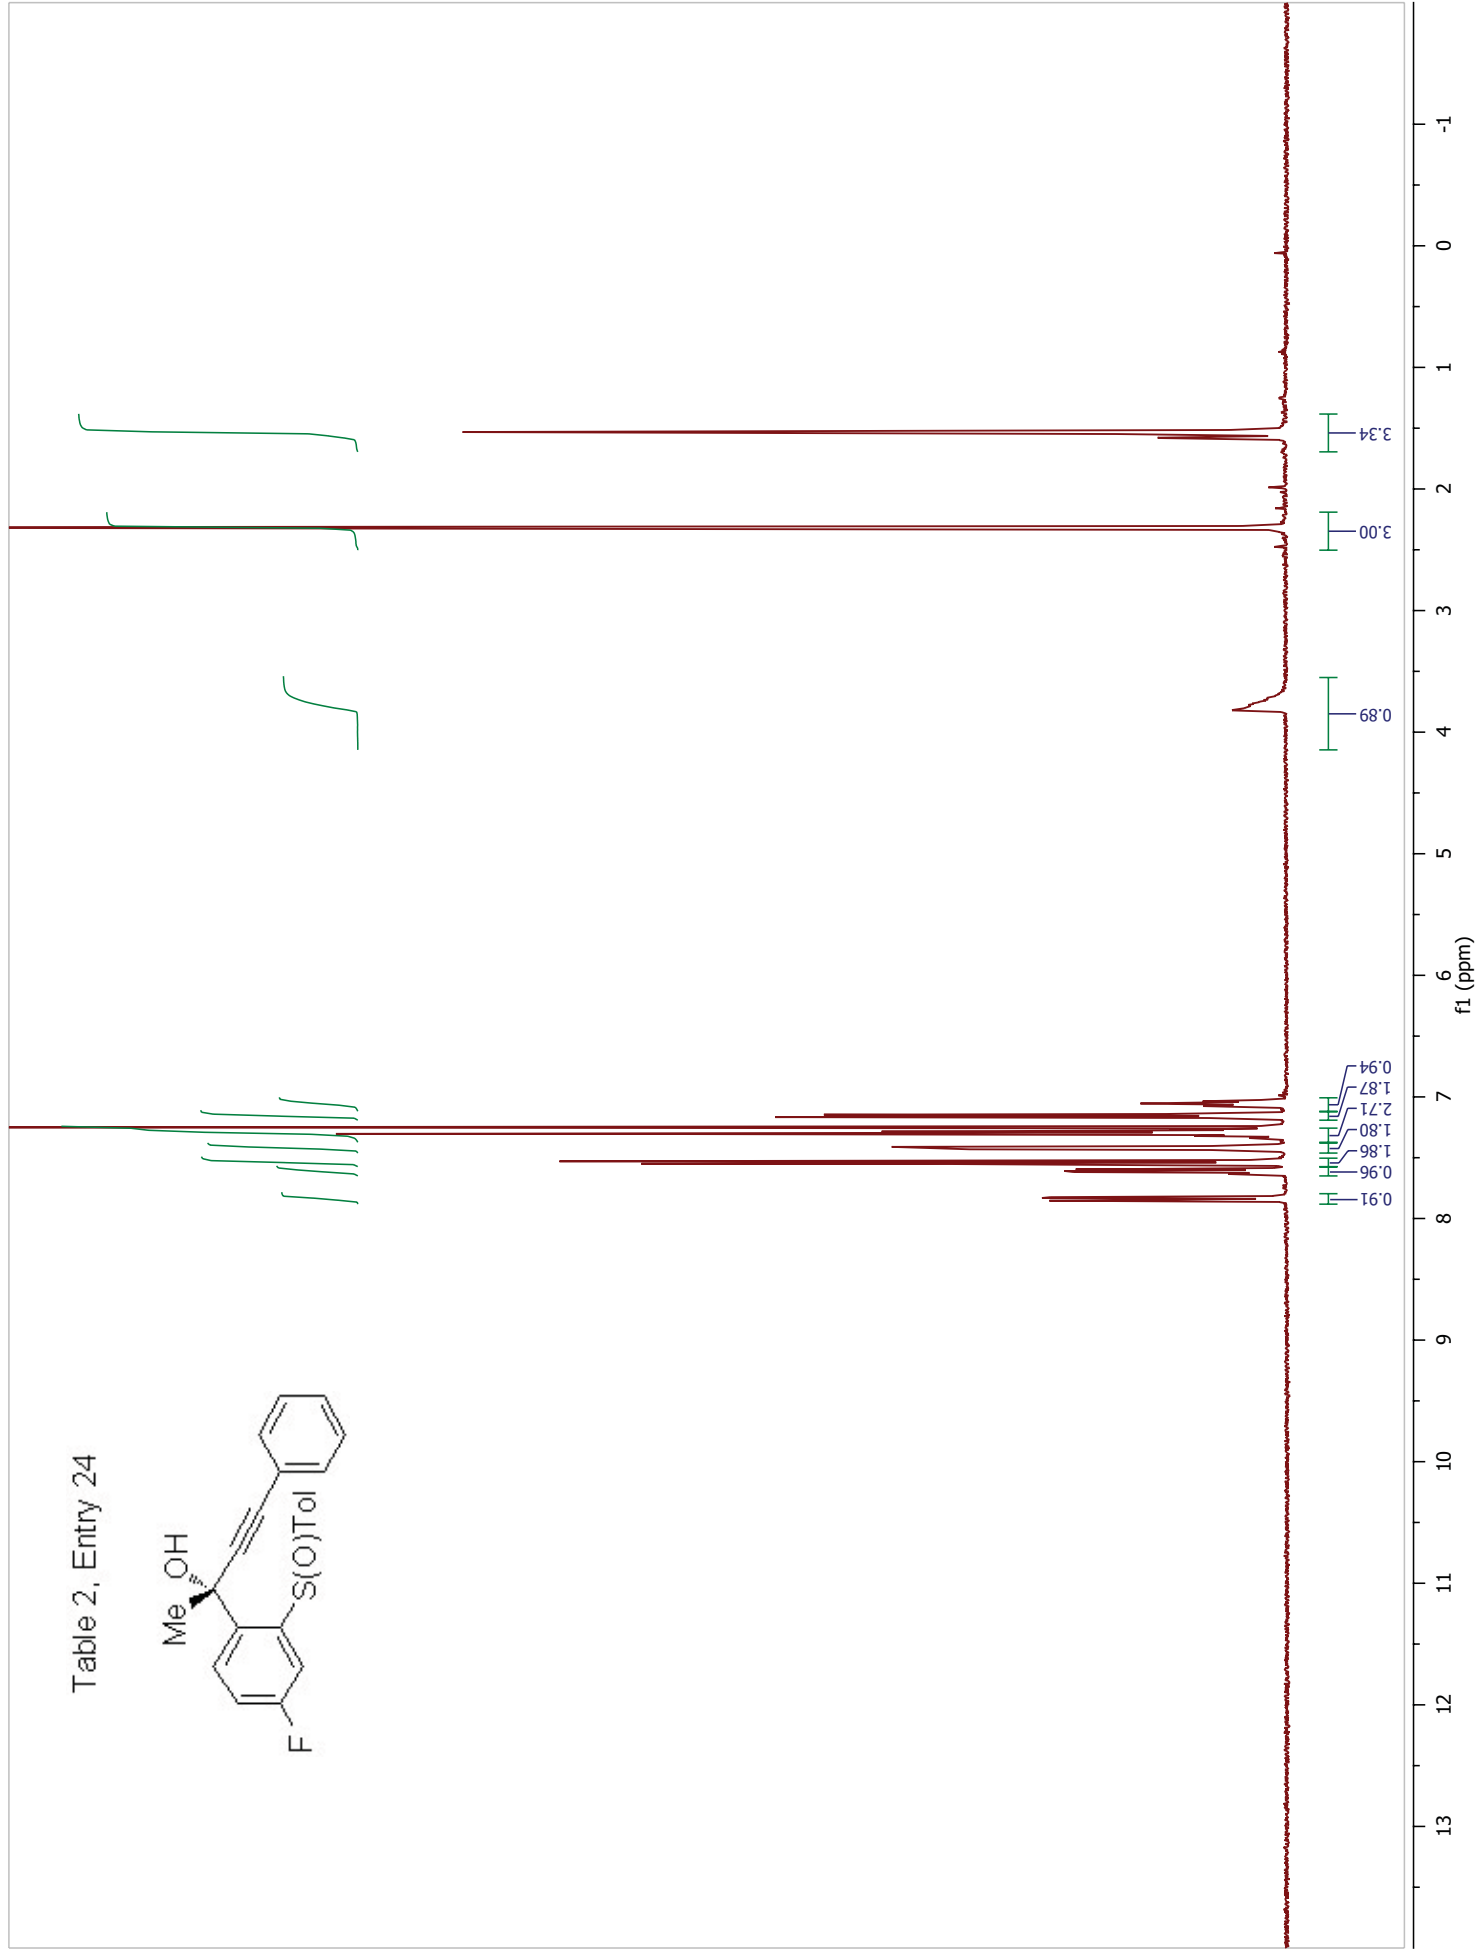

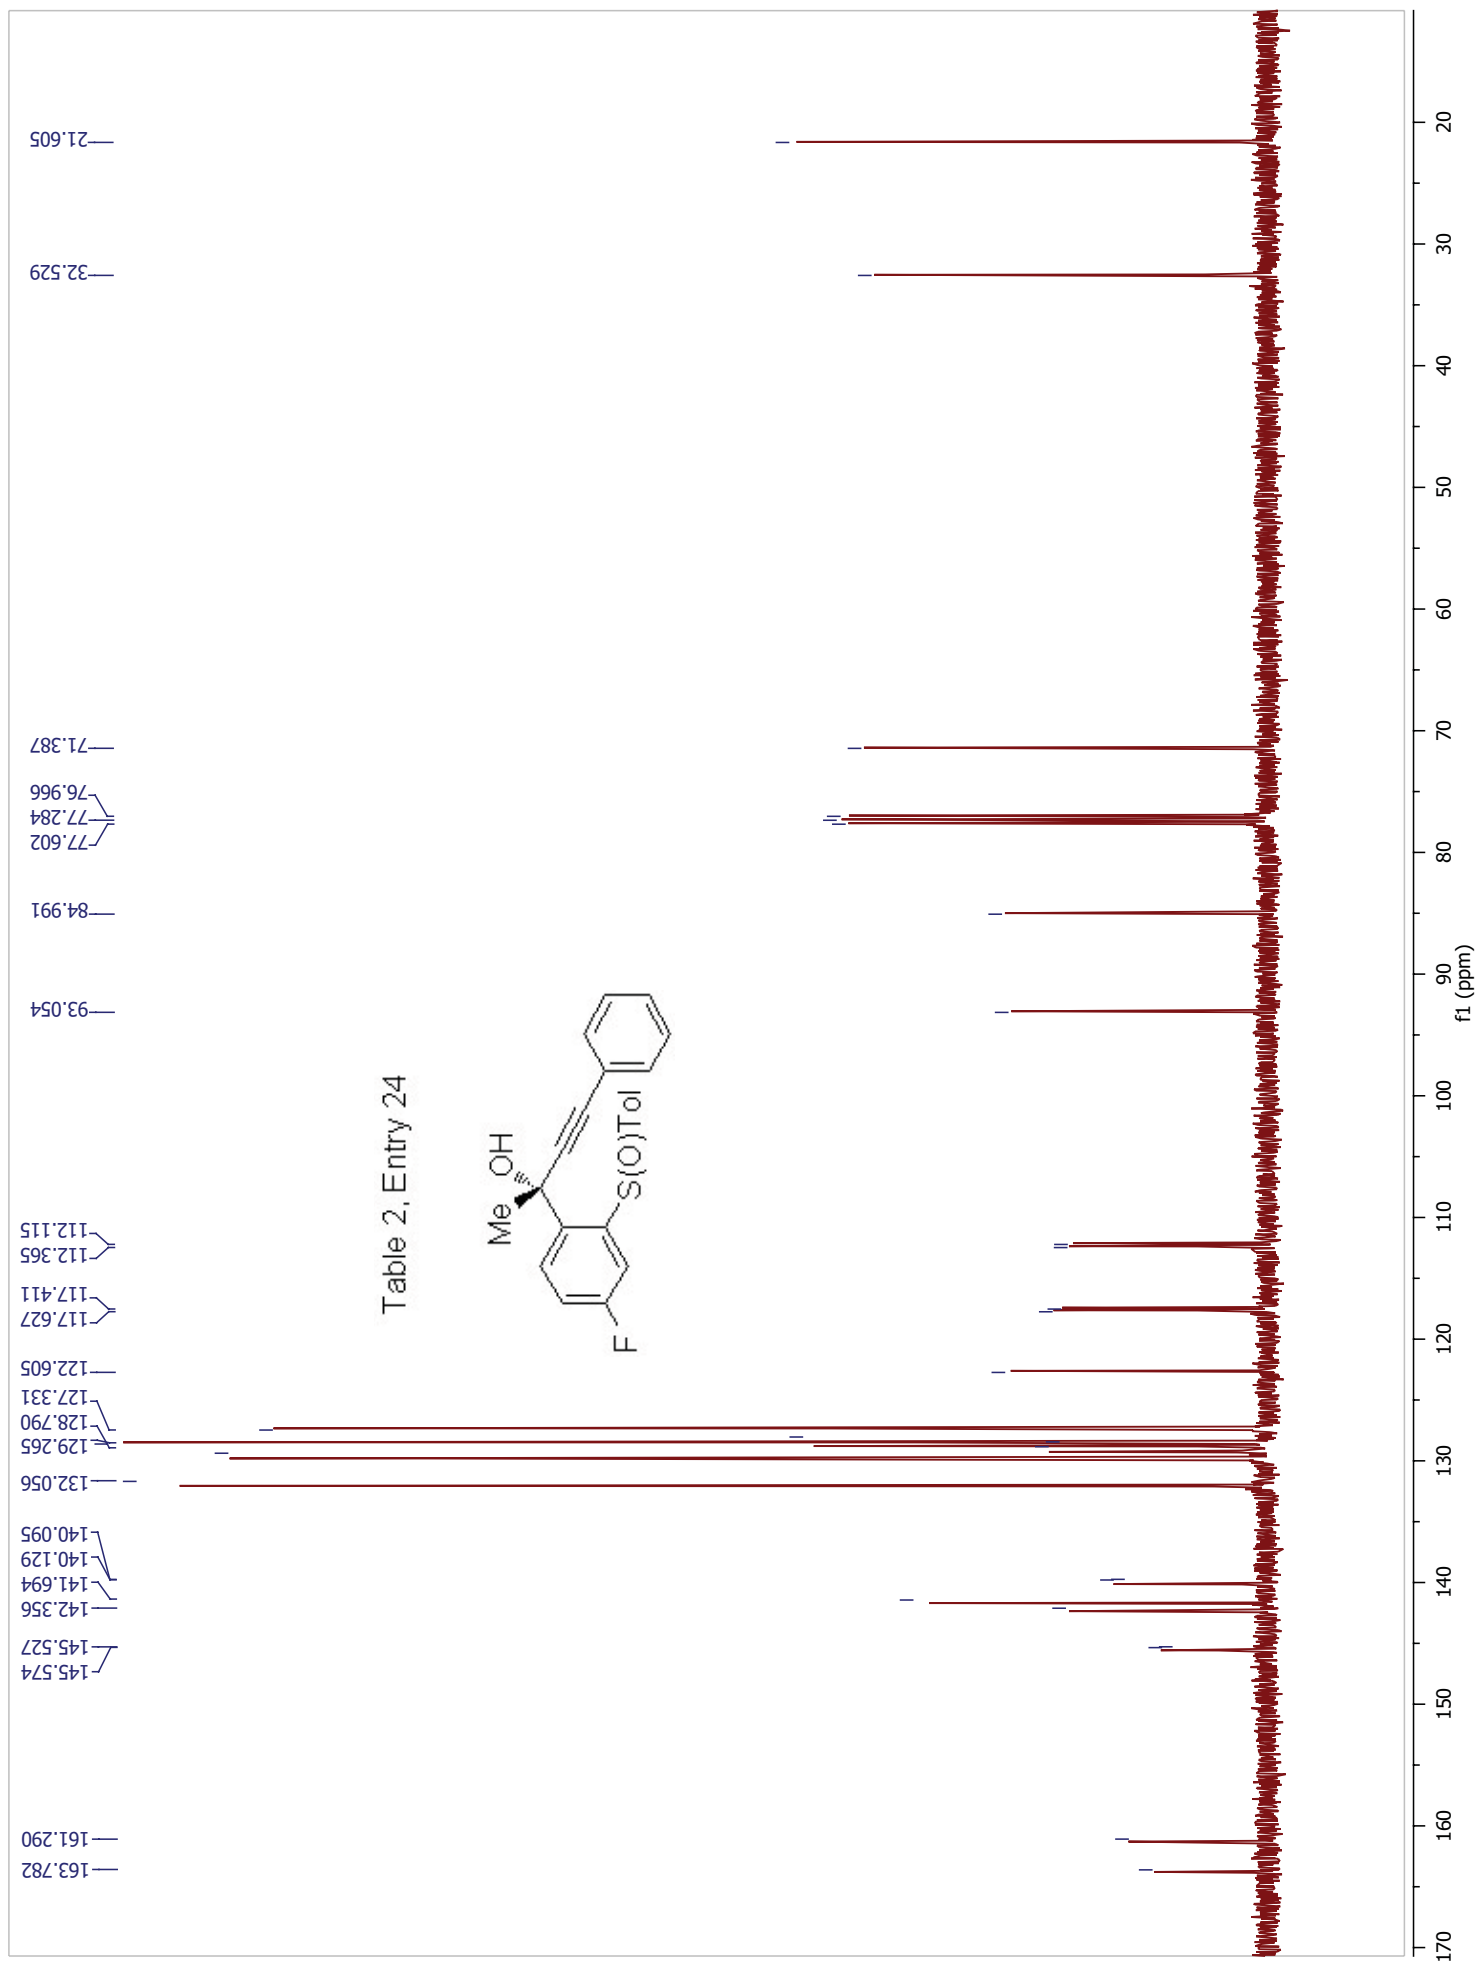

Table 2, Entry 25

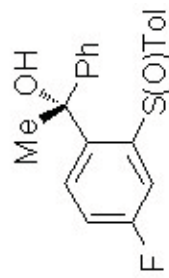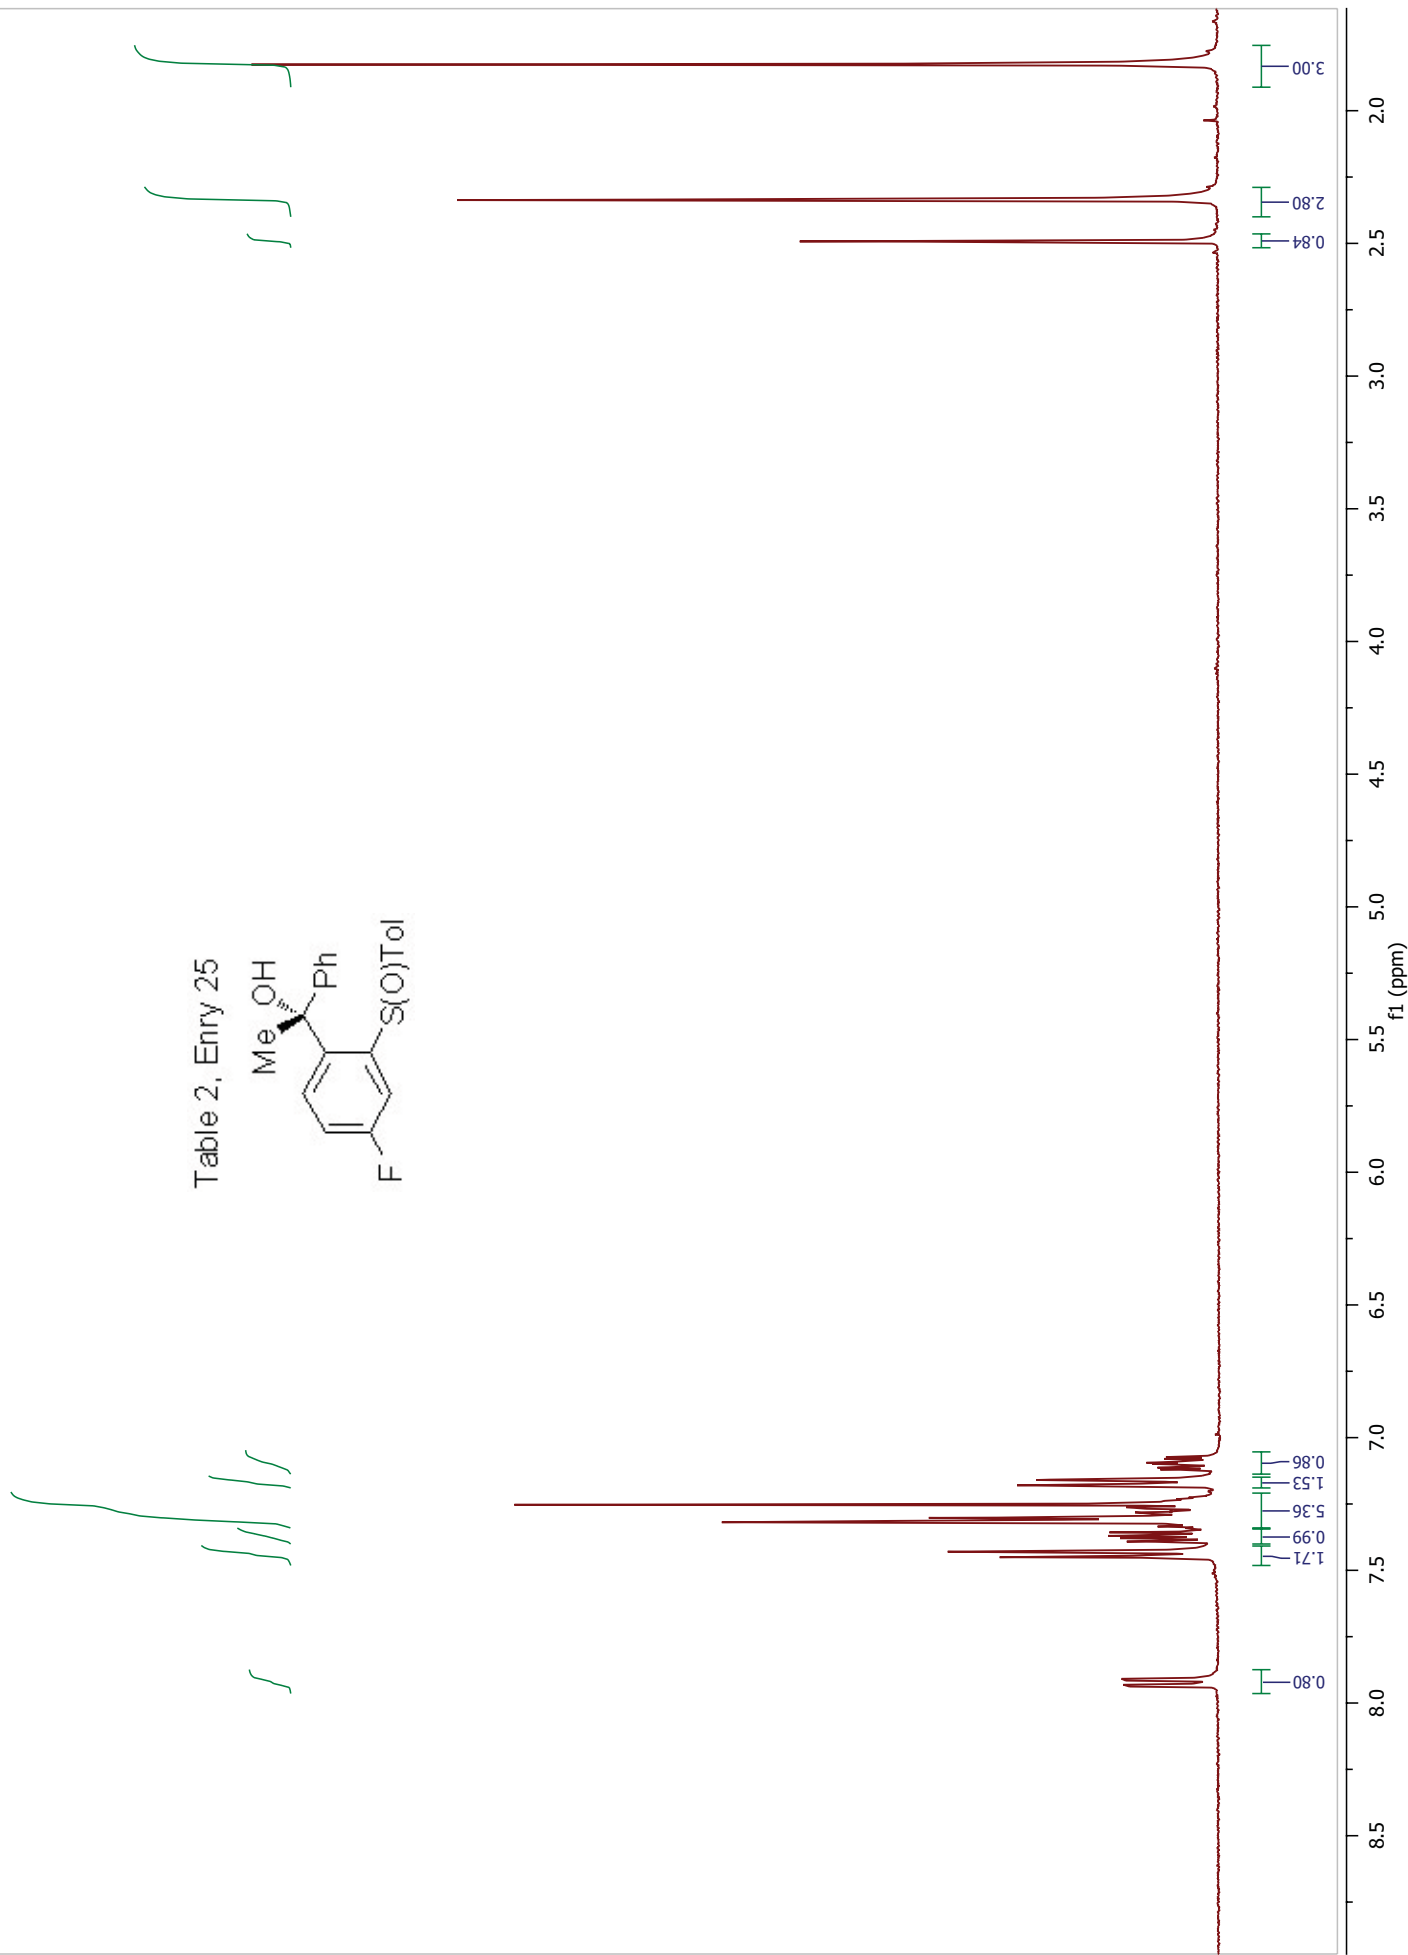



Table 2, Entry 25

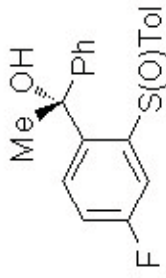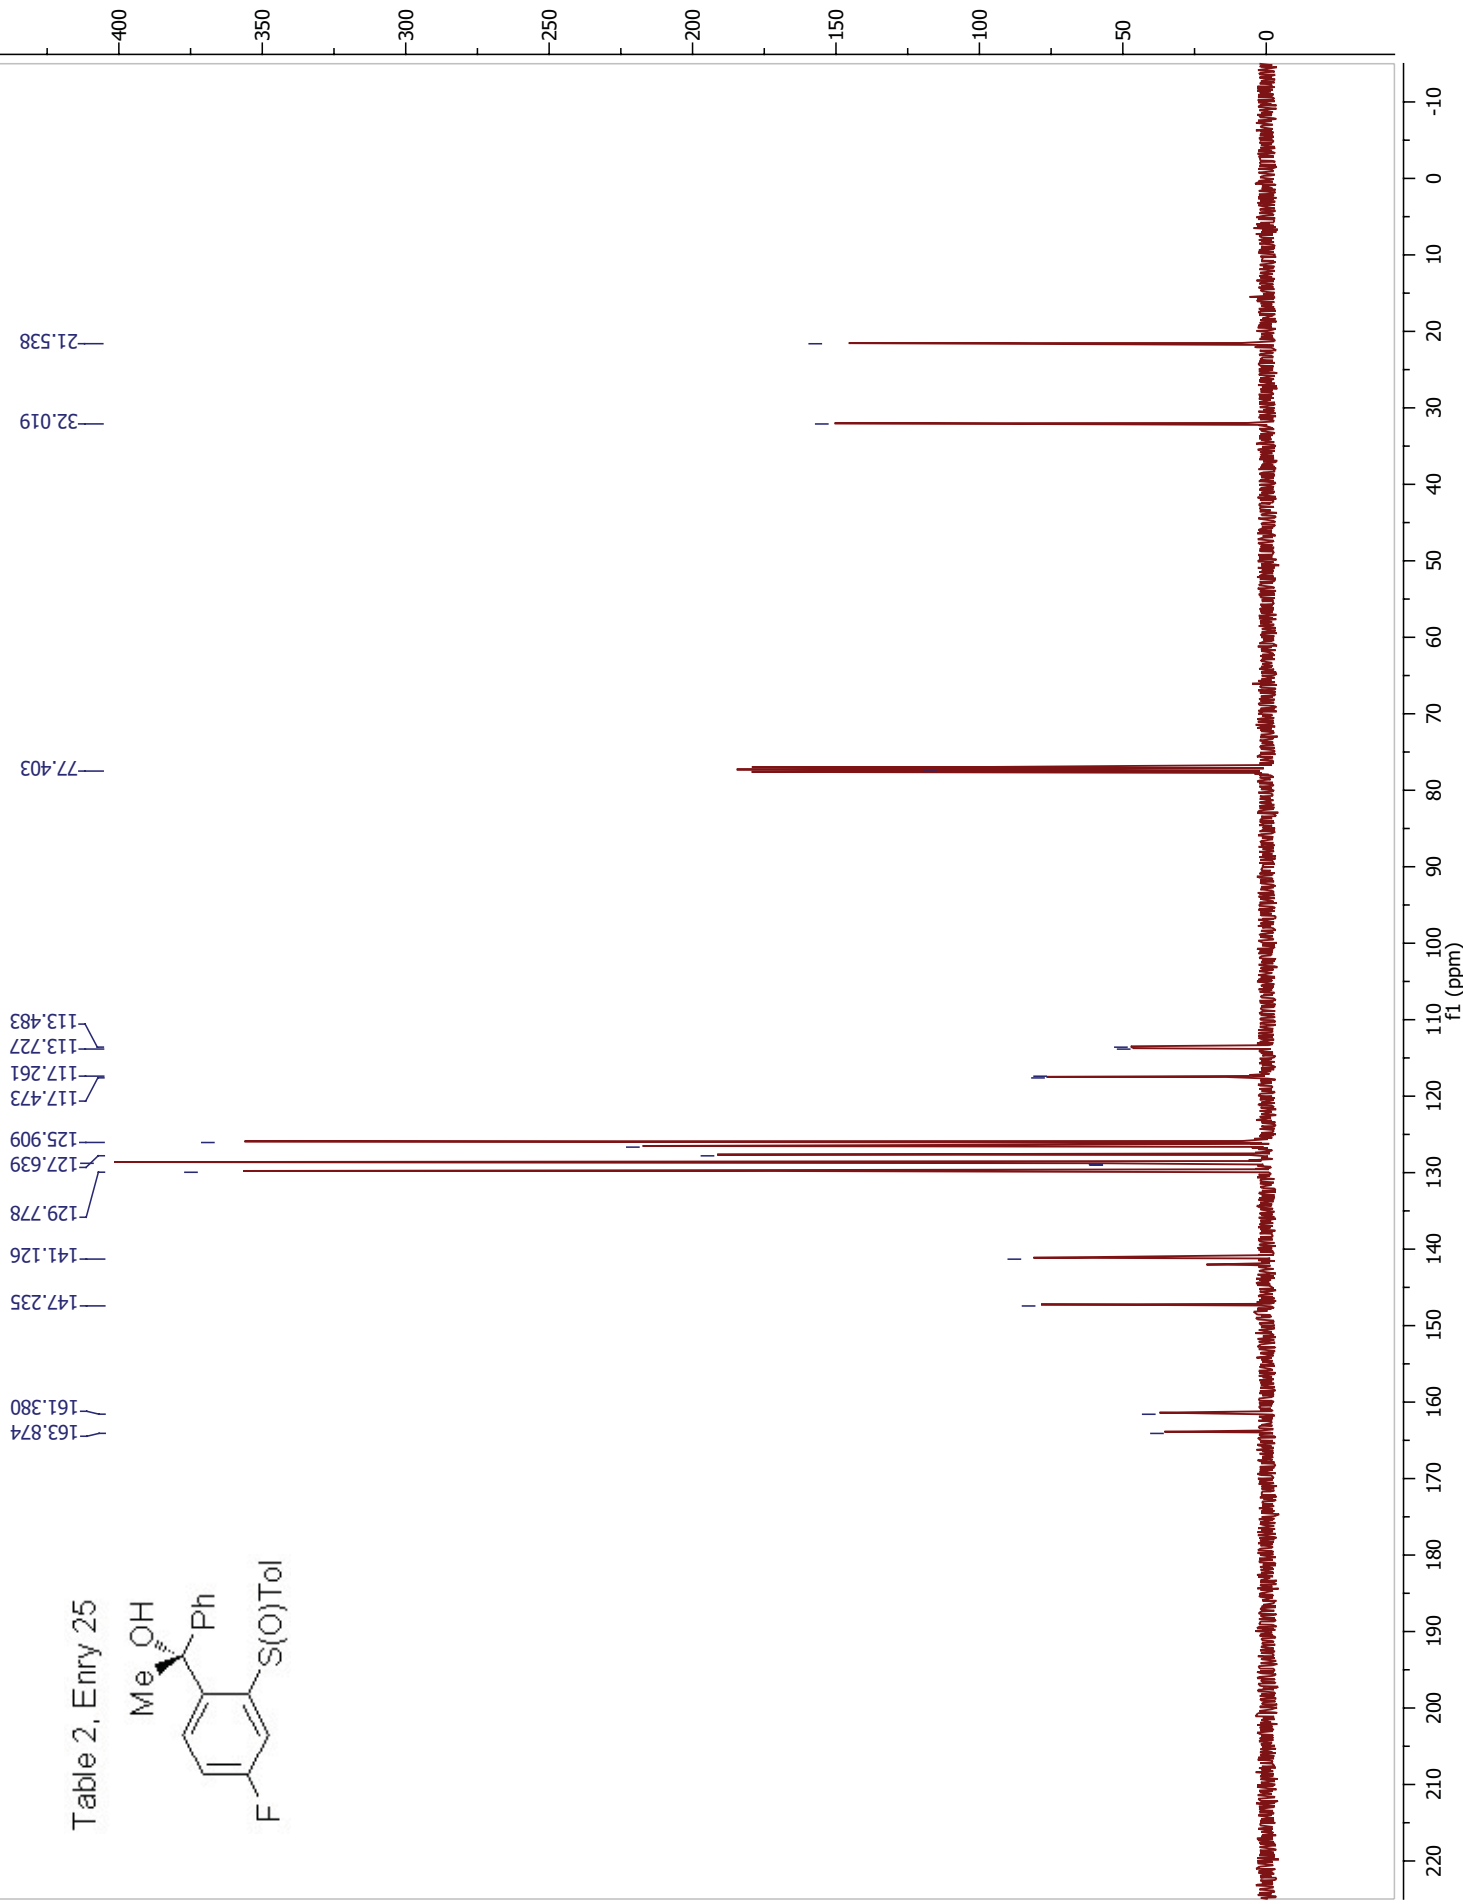

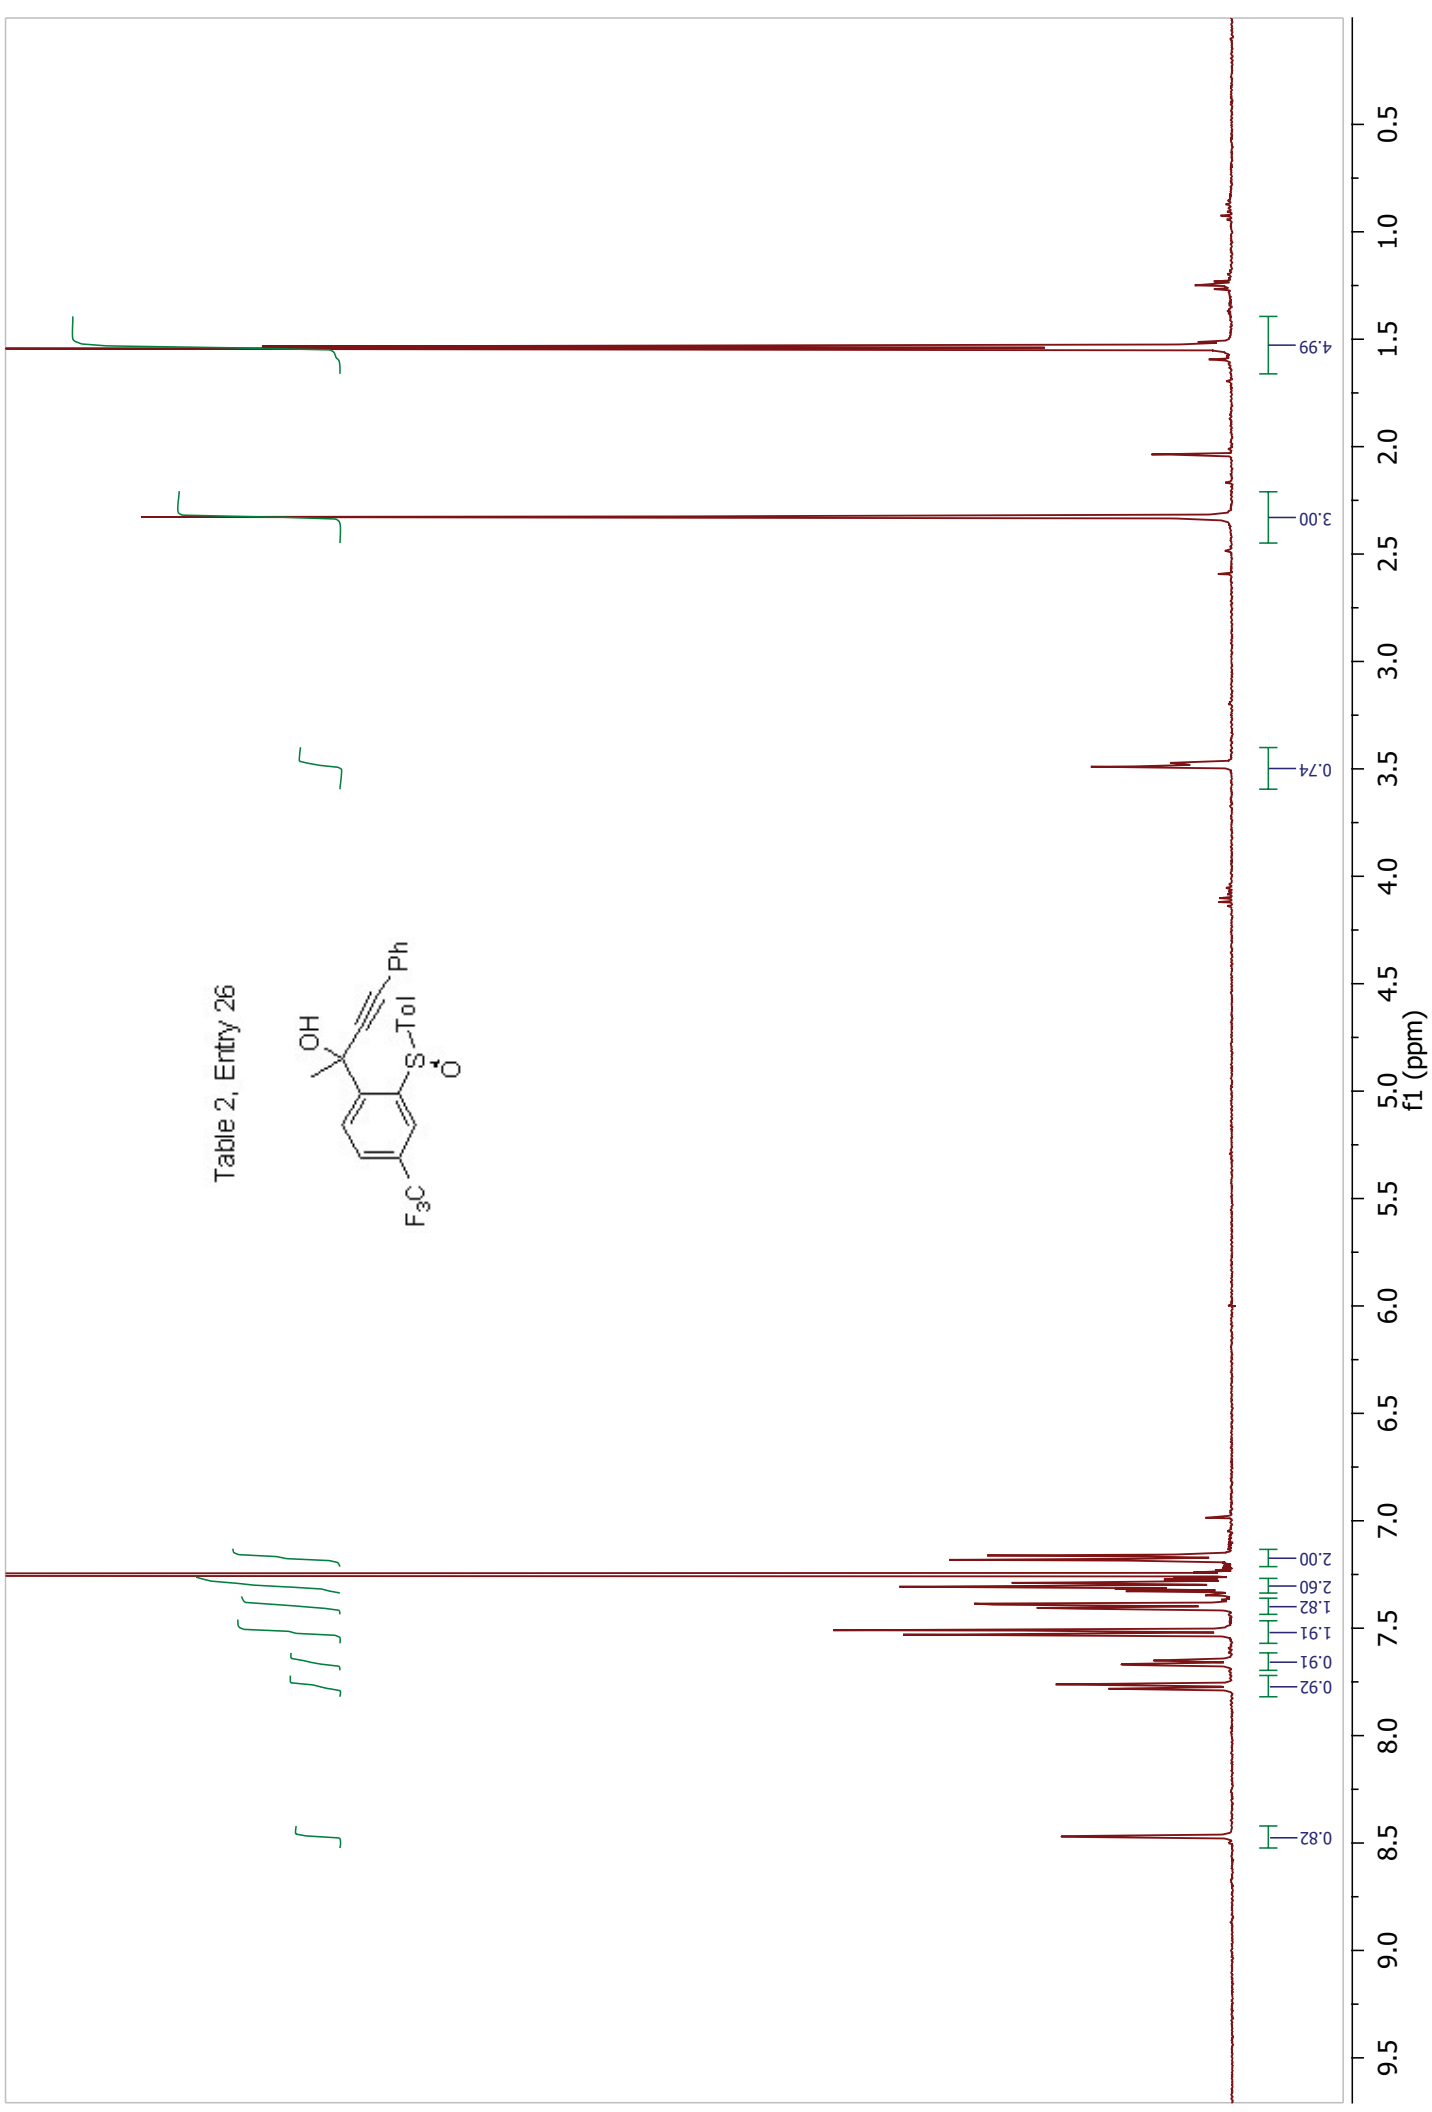

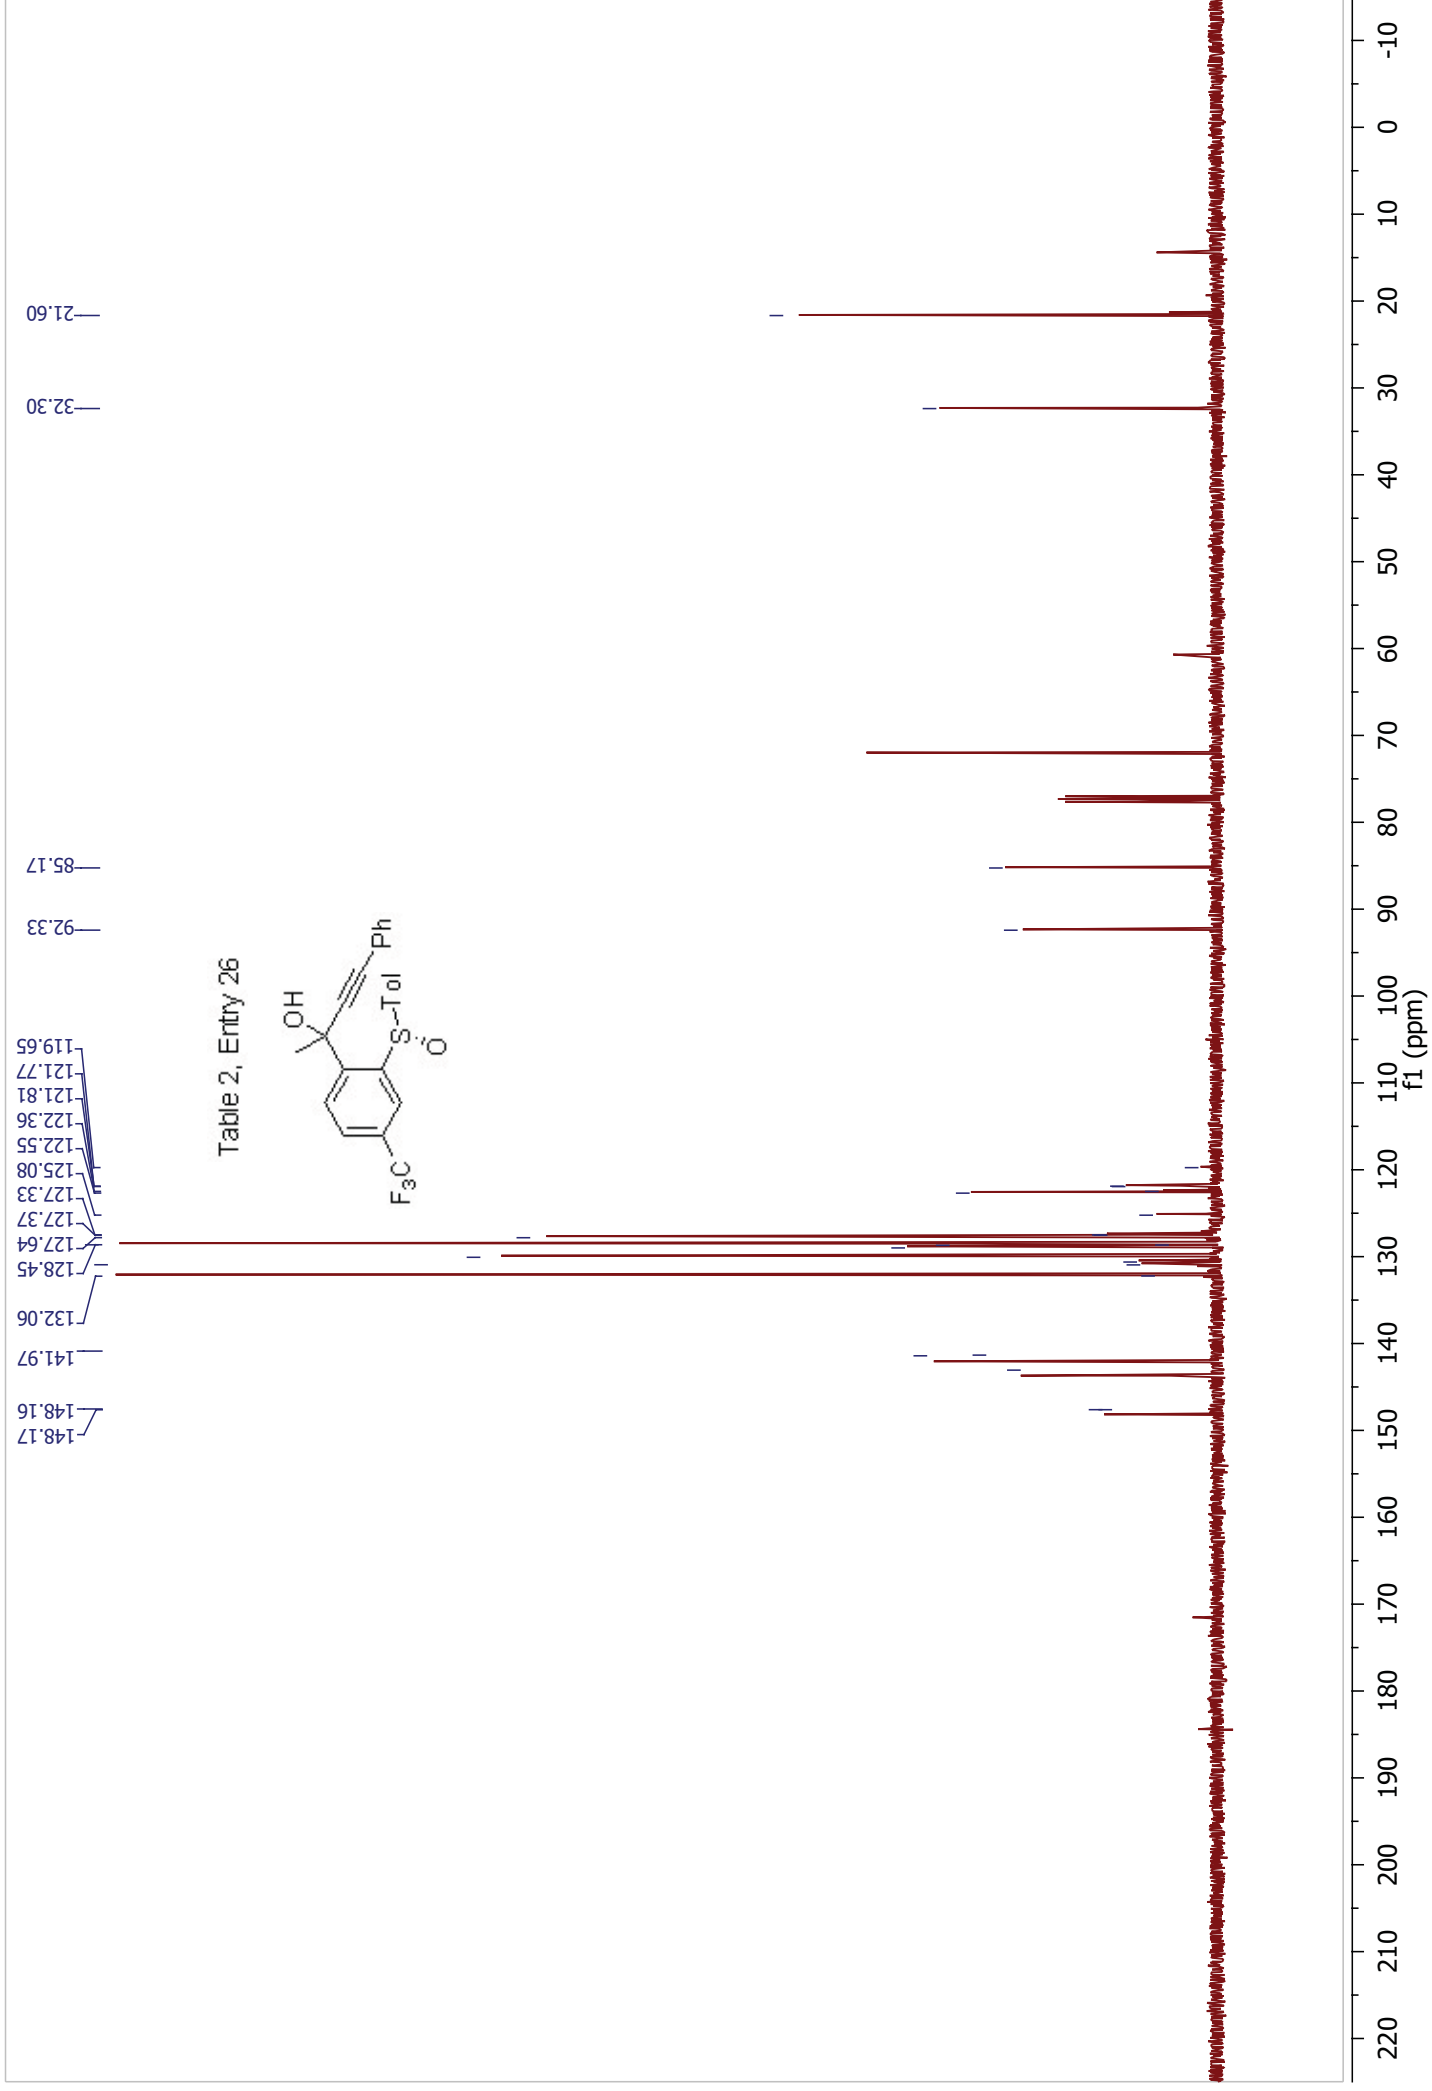

Table 3, Entry 1

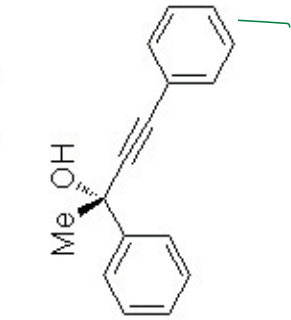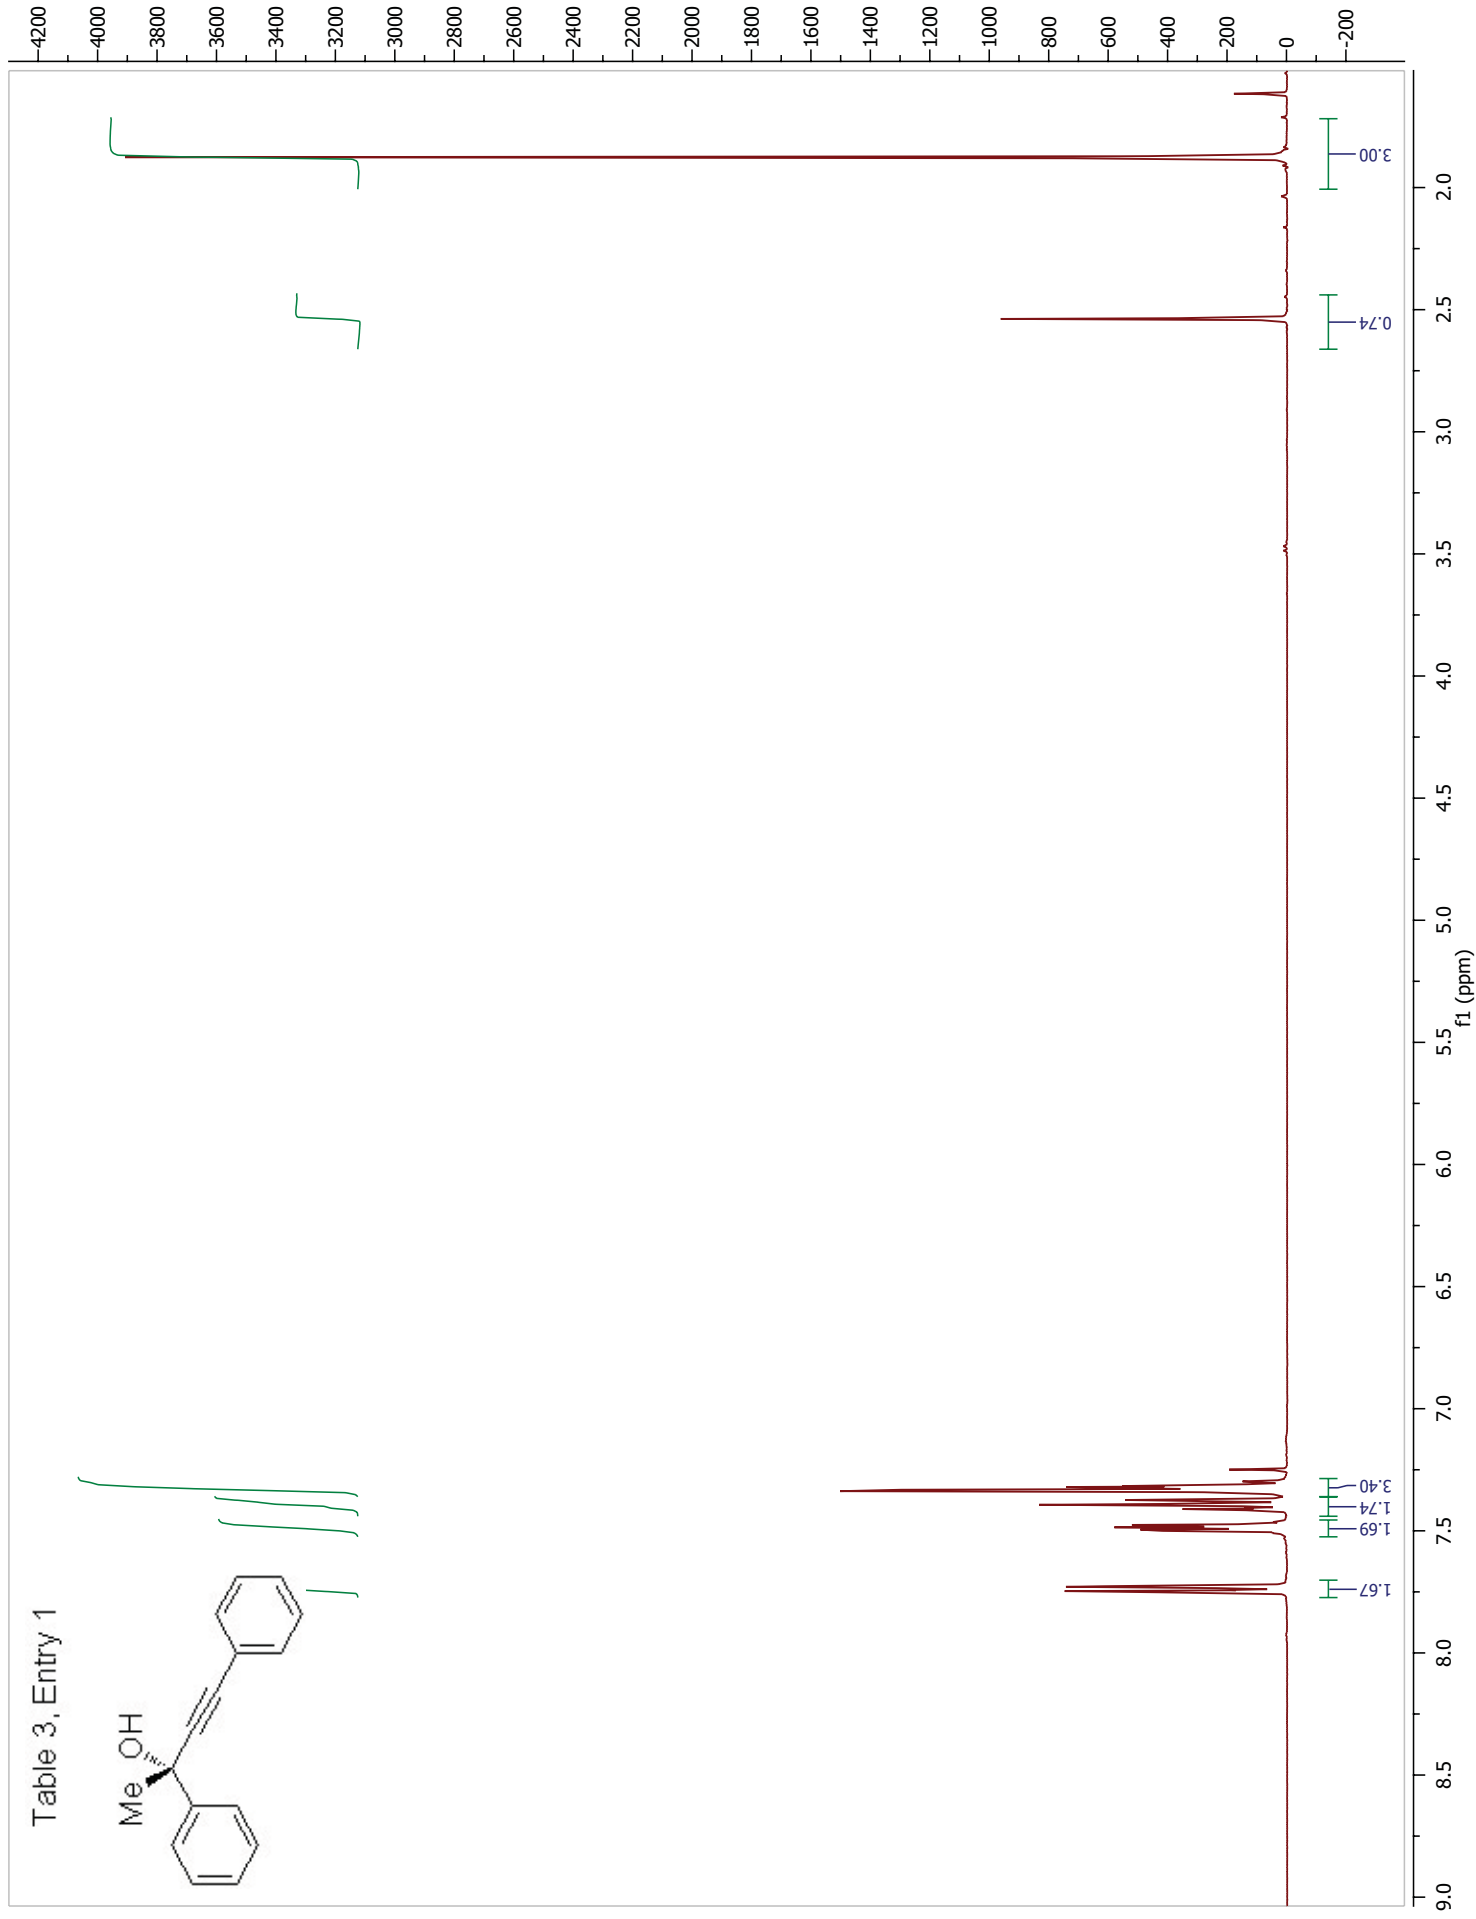

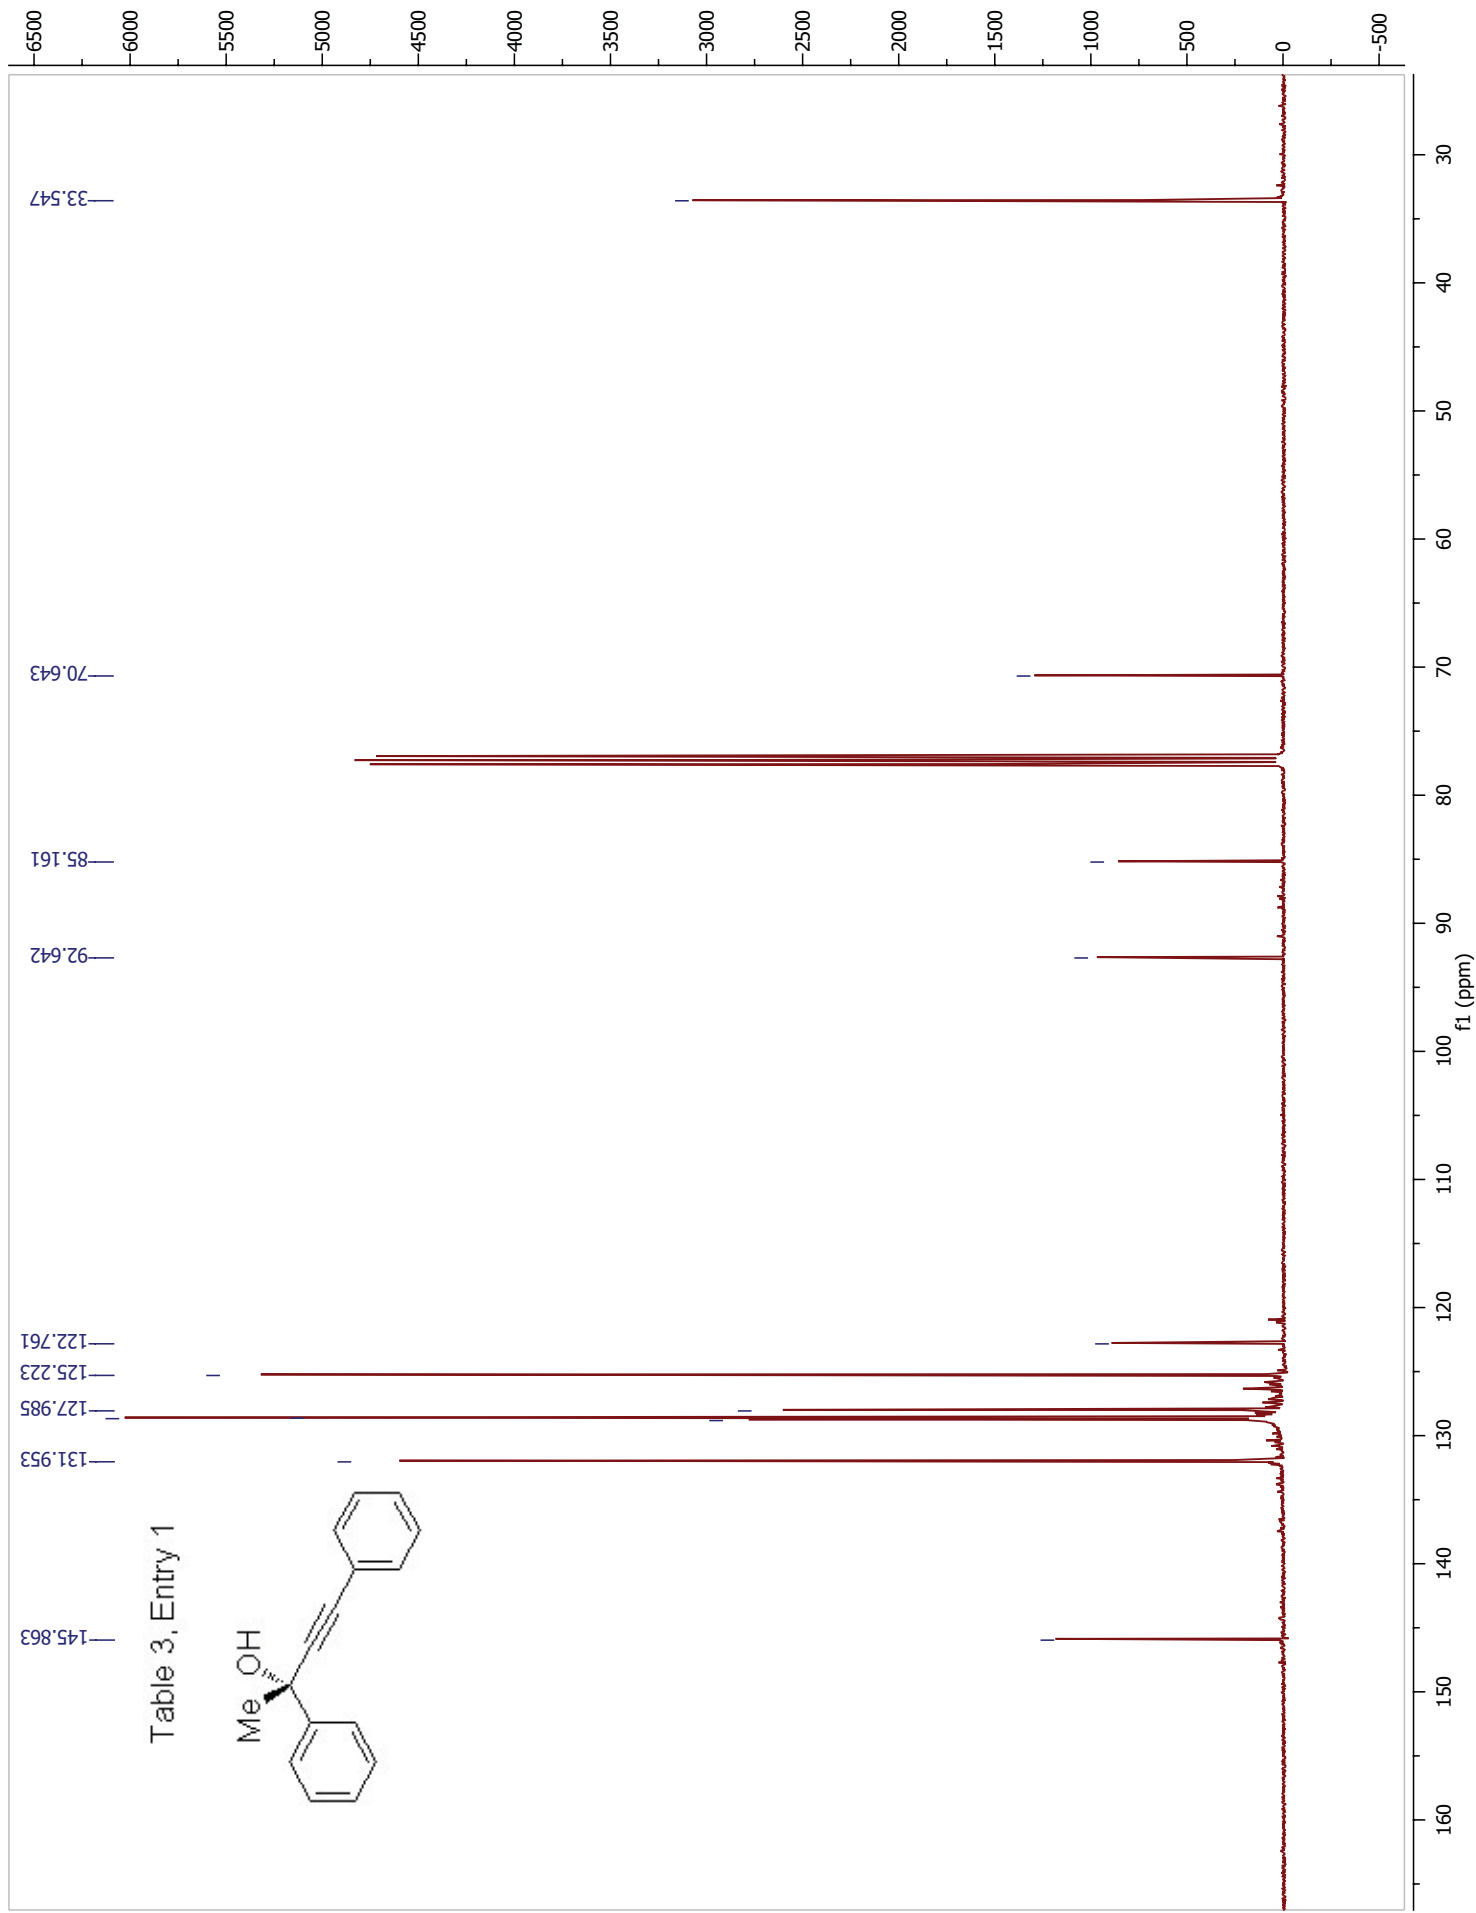



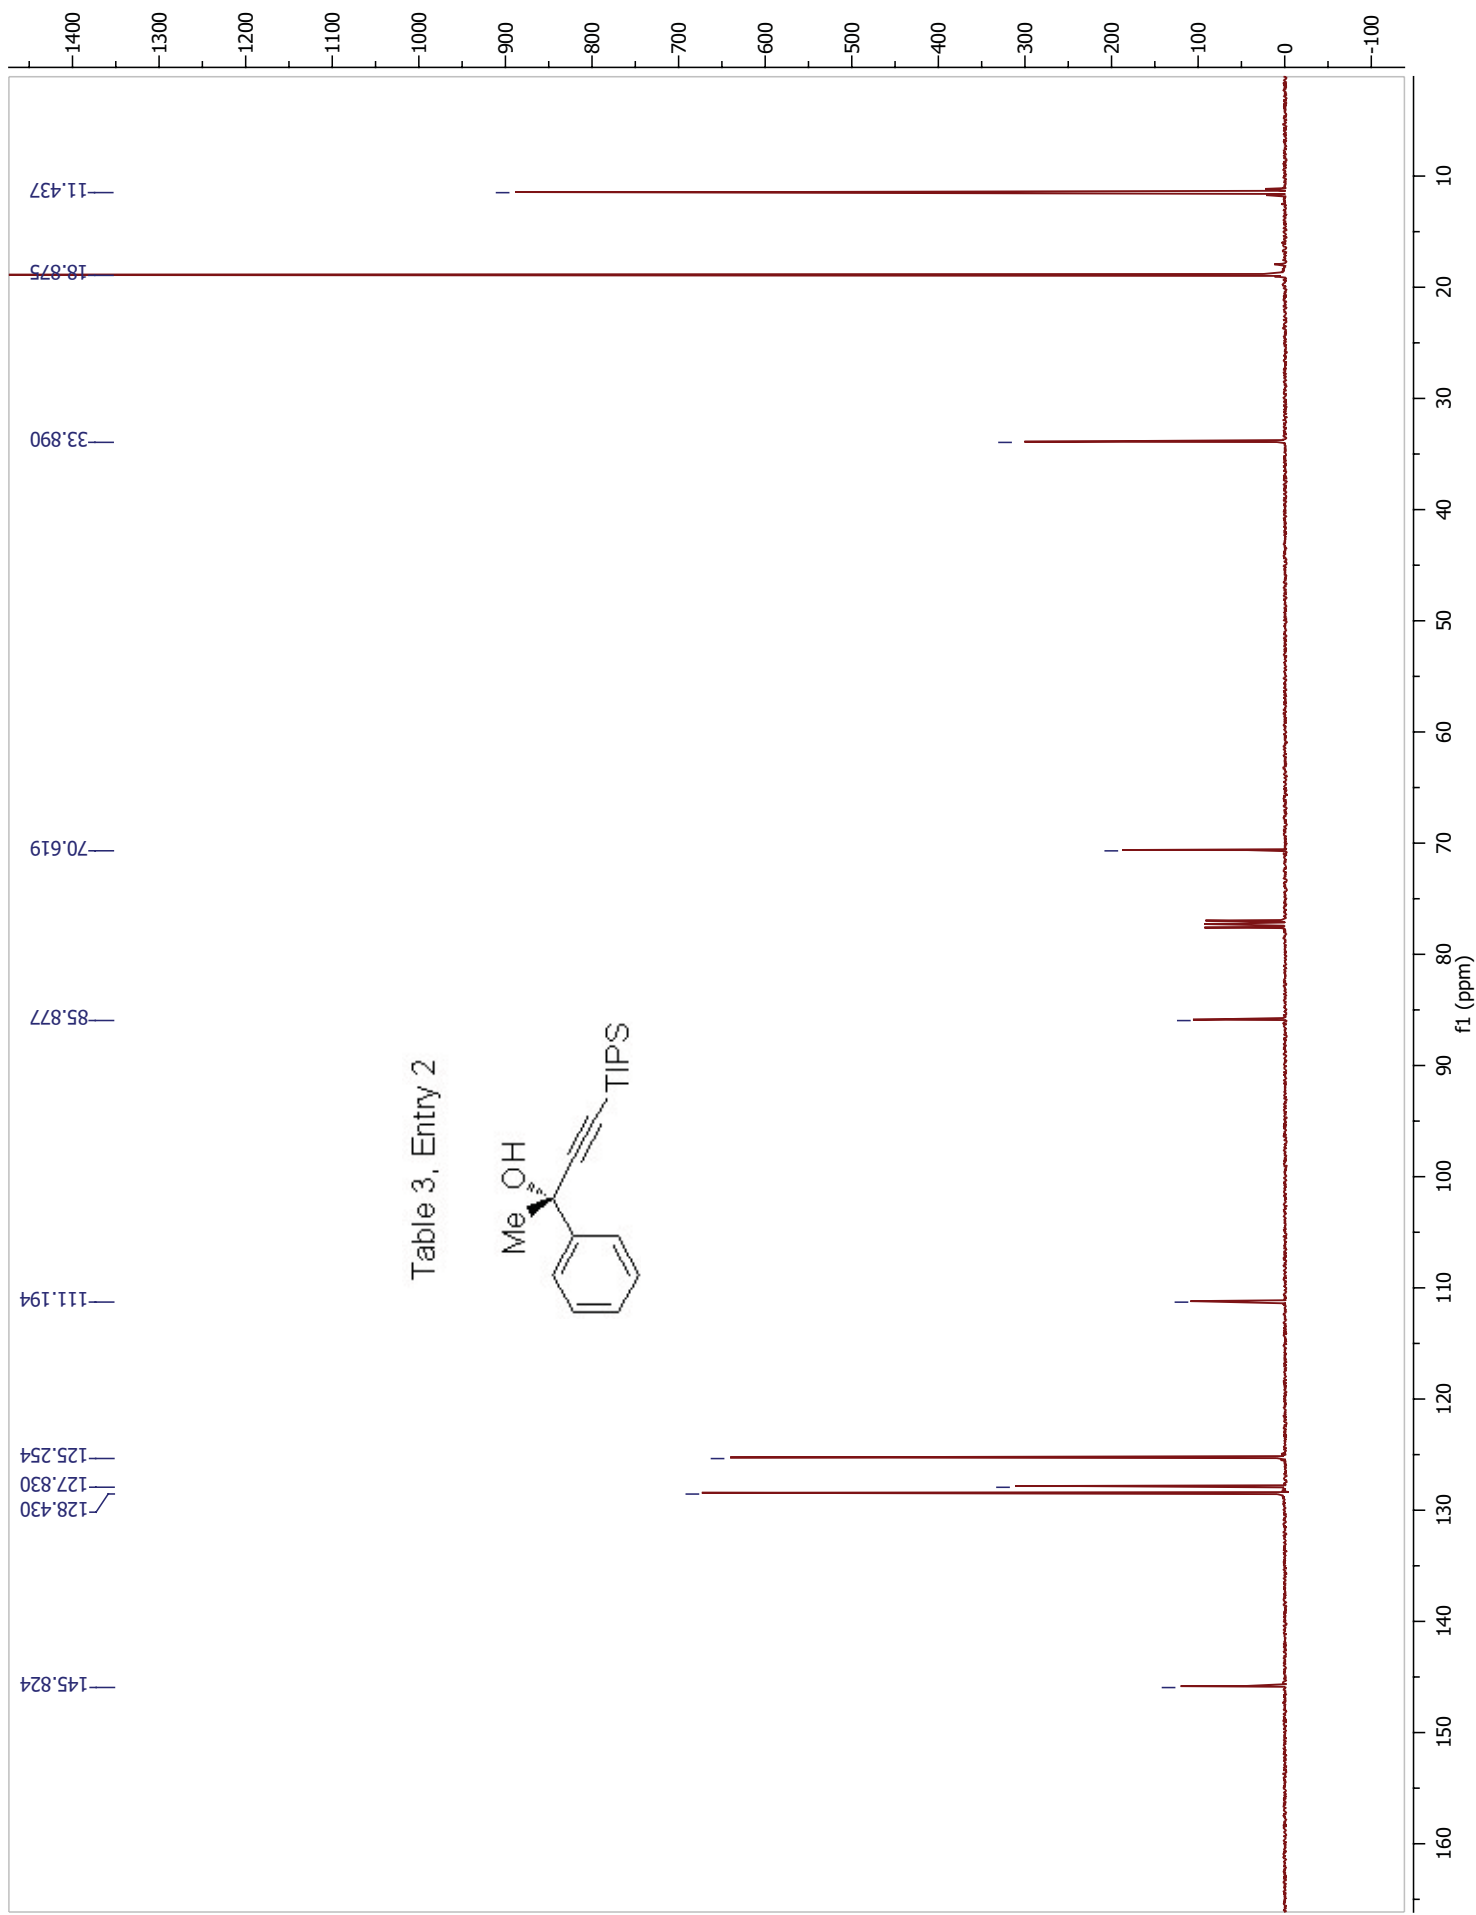

Table 3, Entry 3

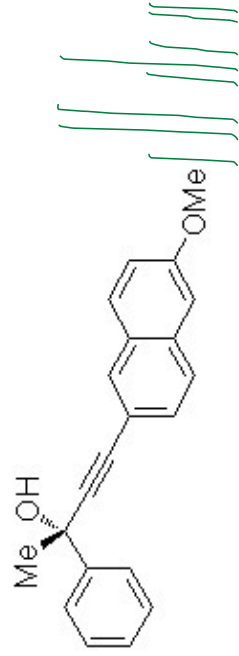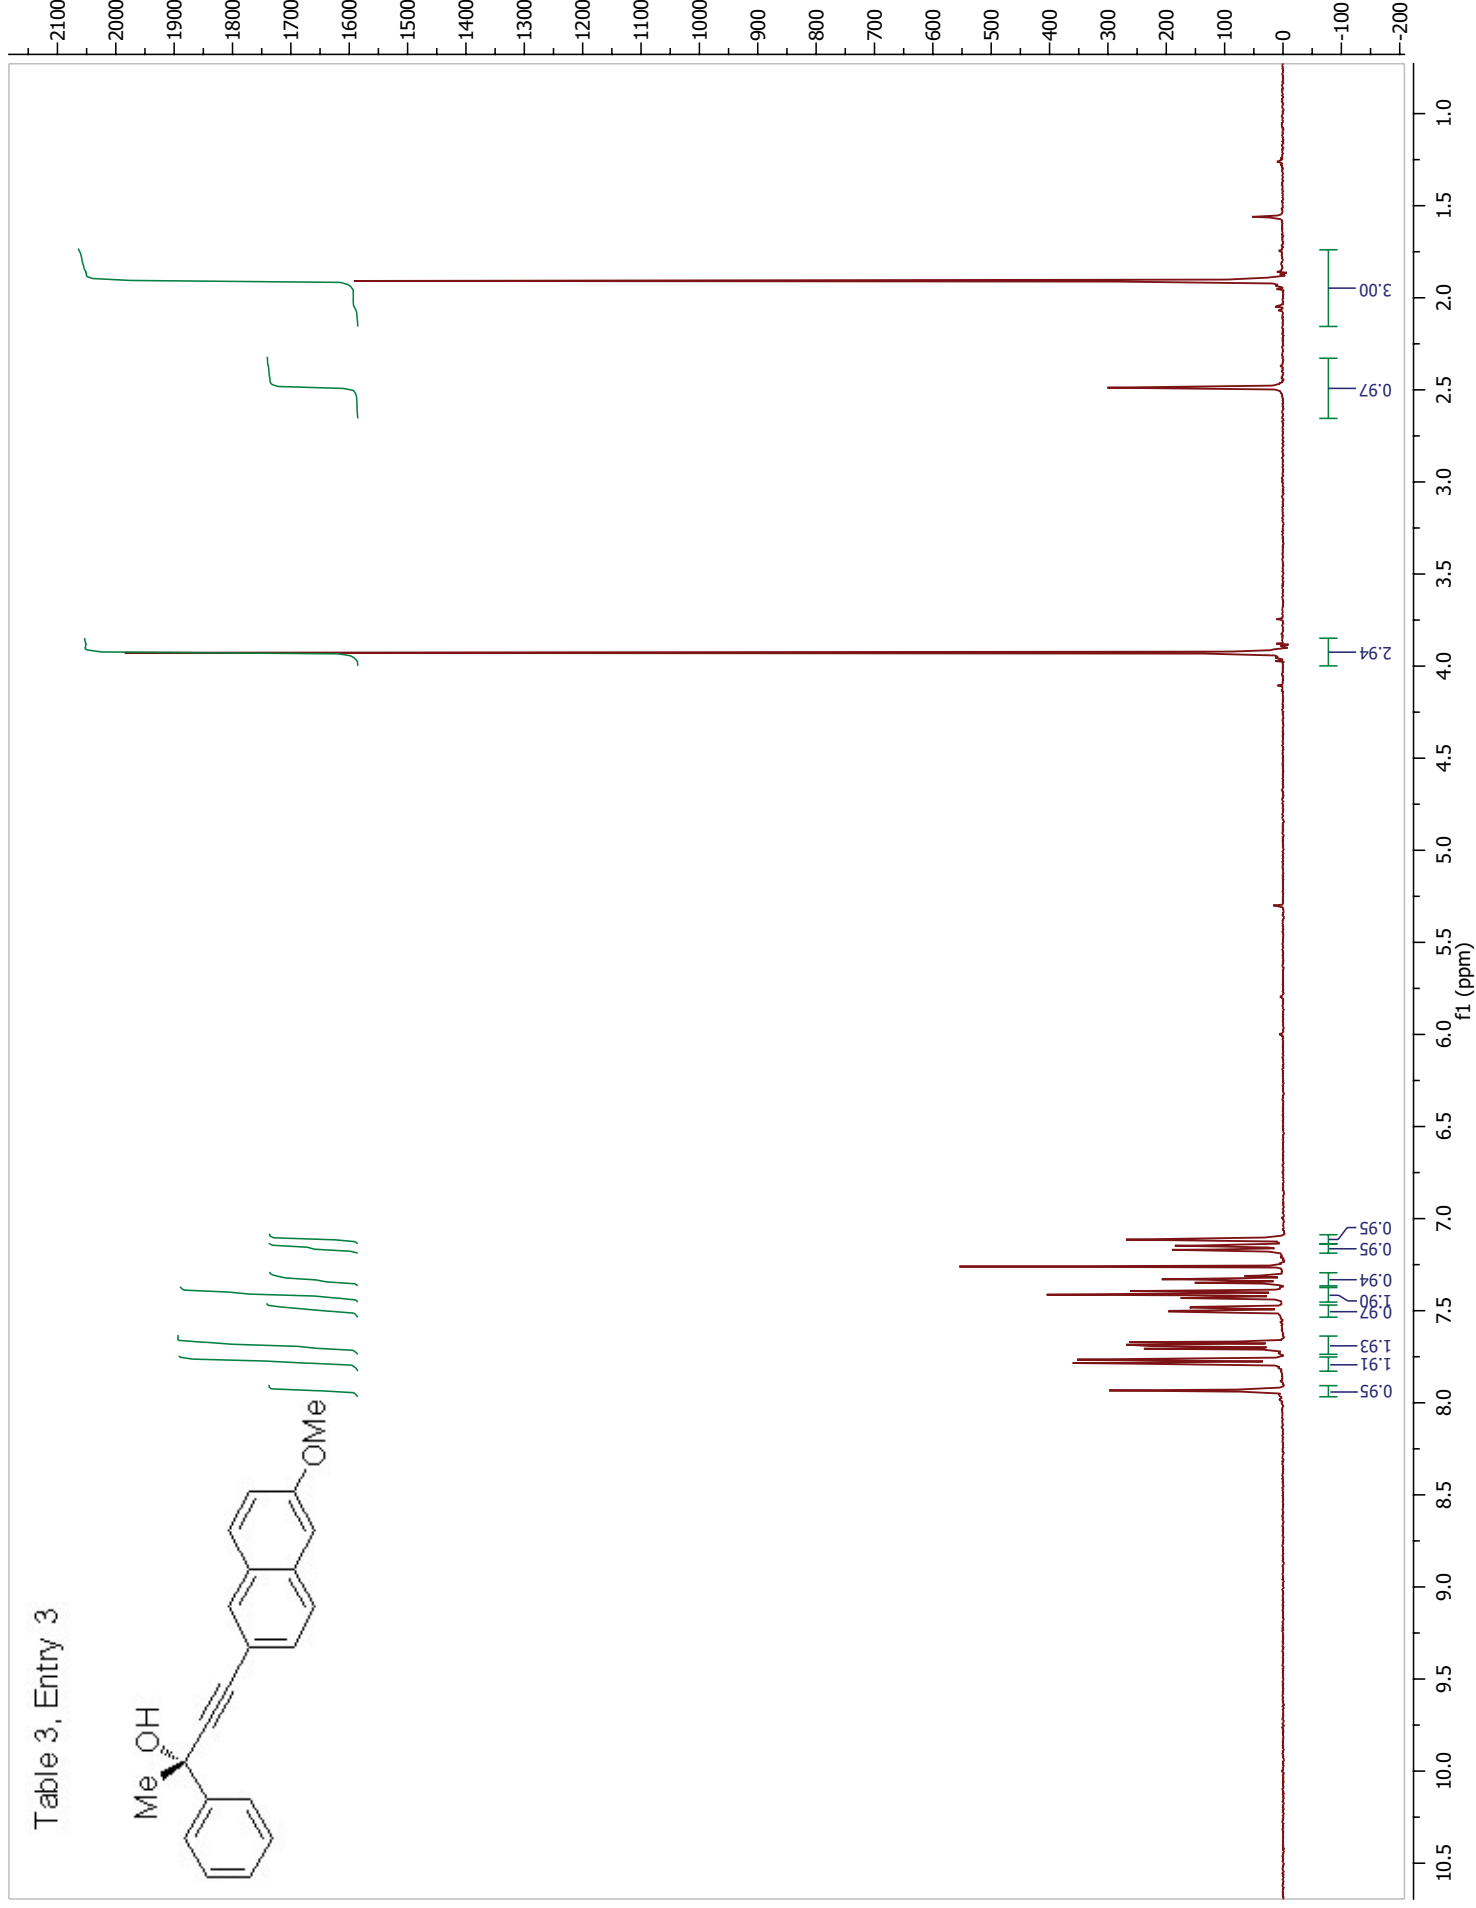



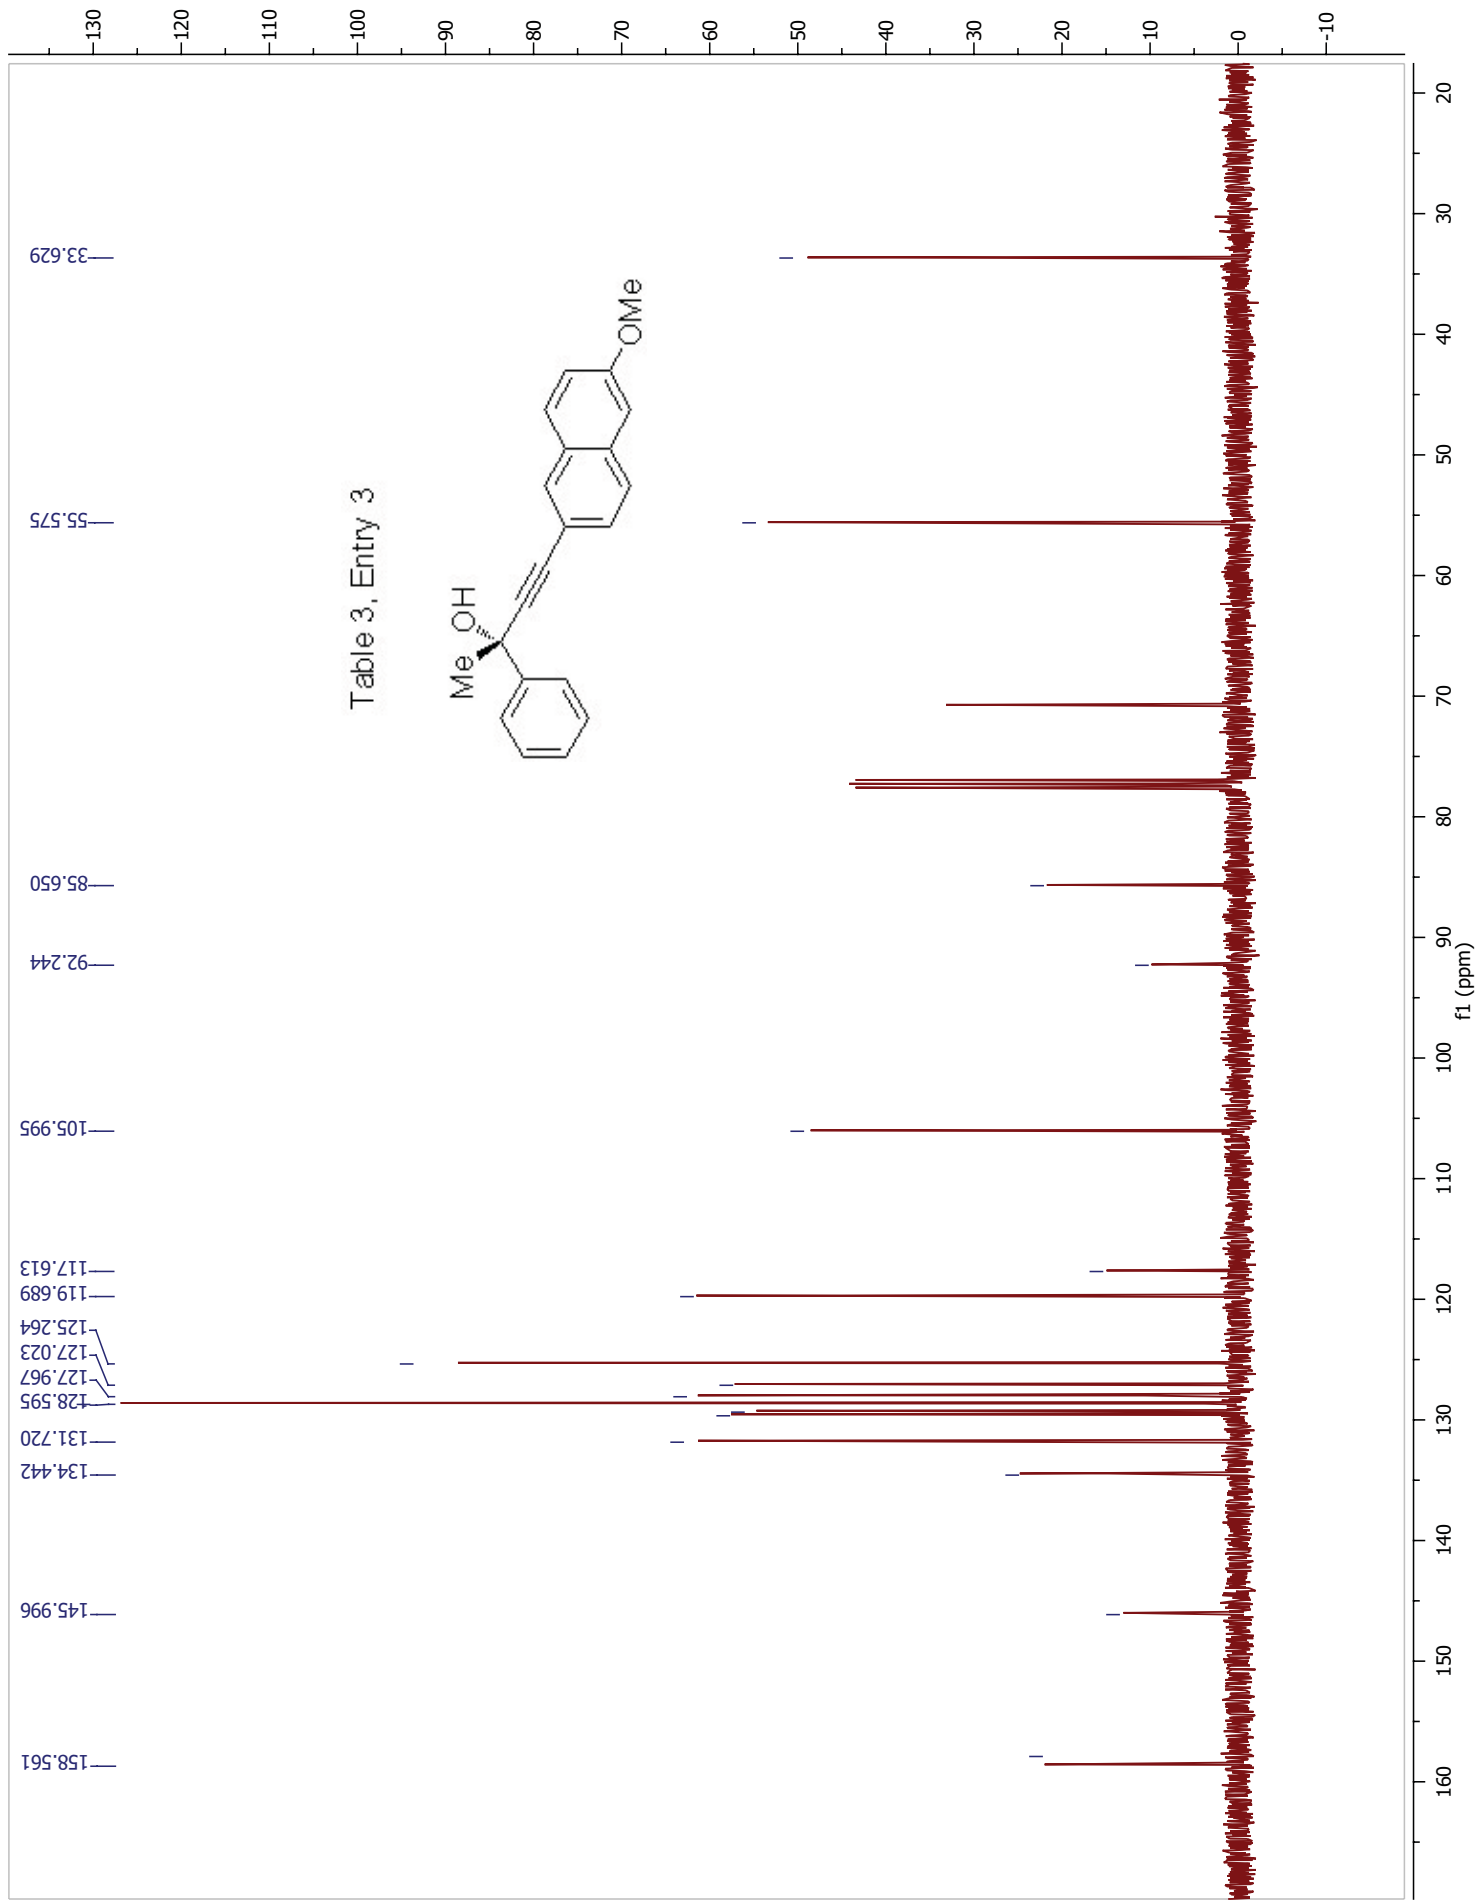

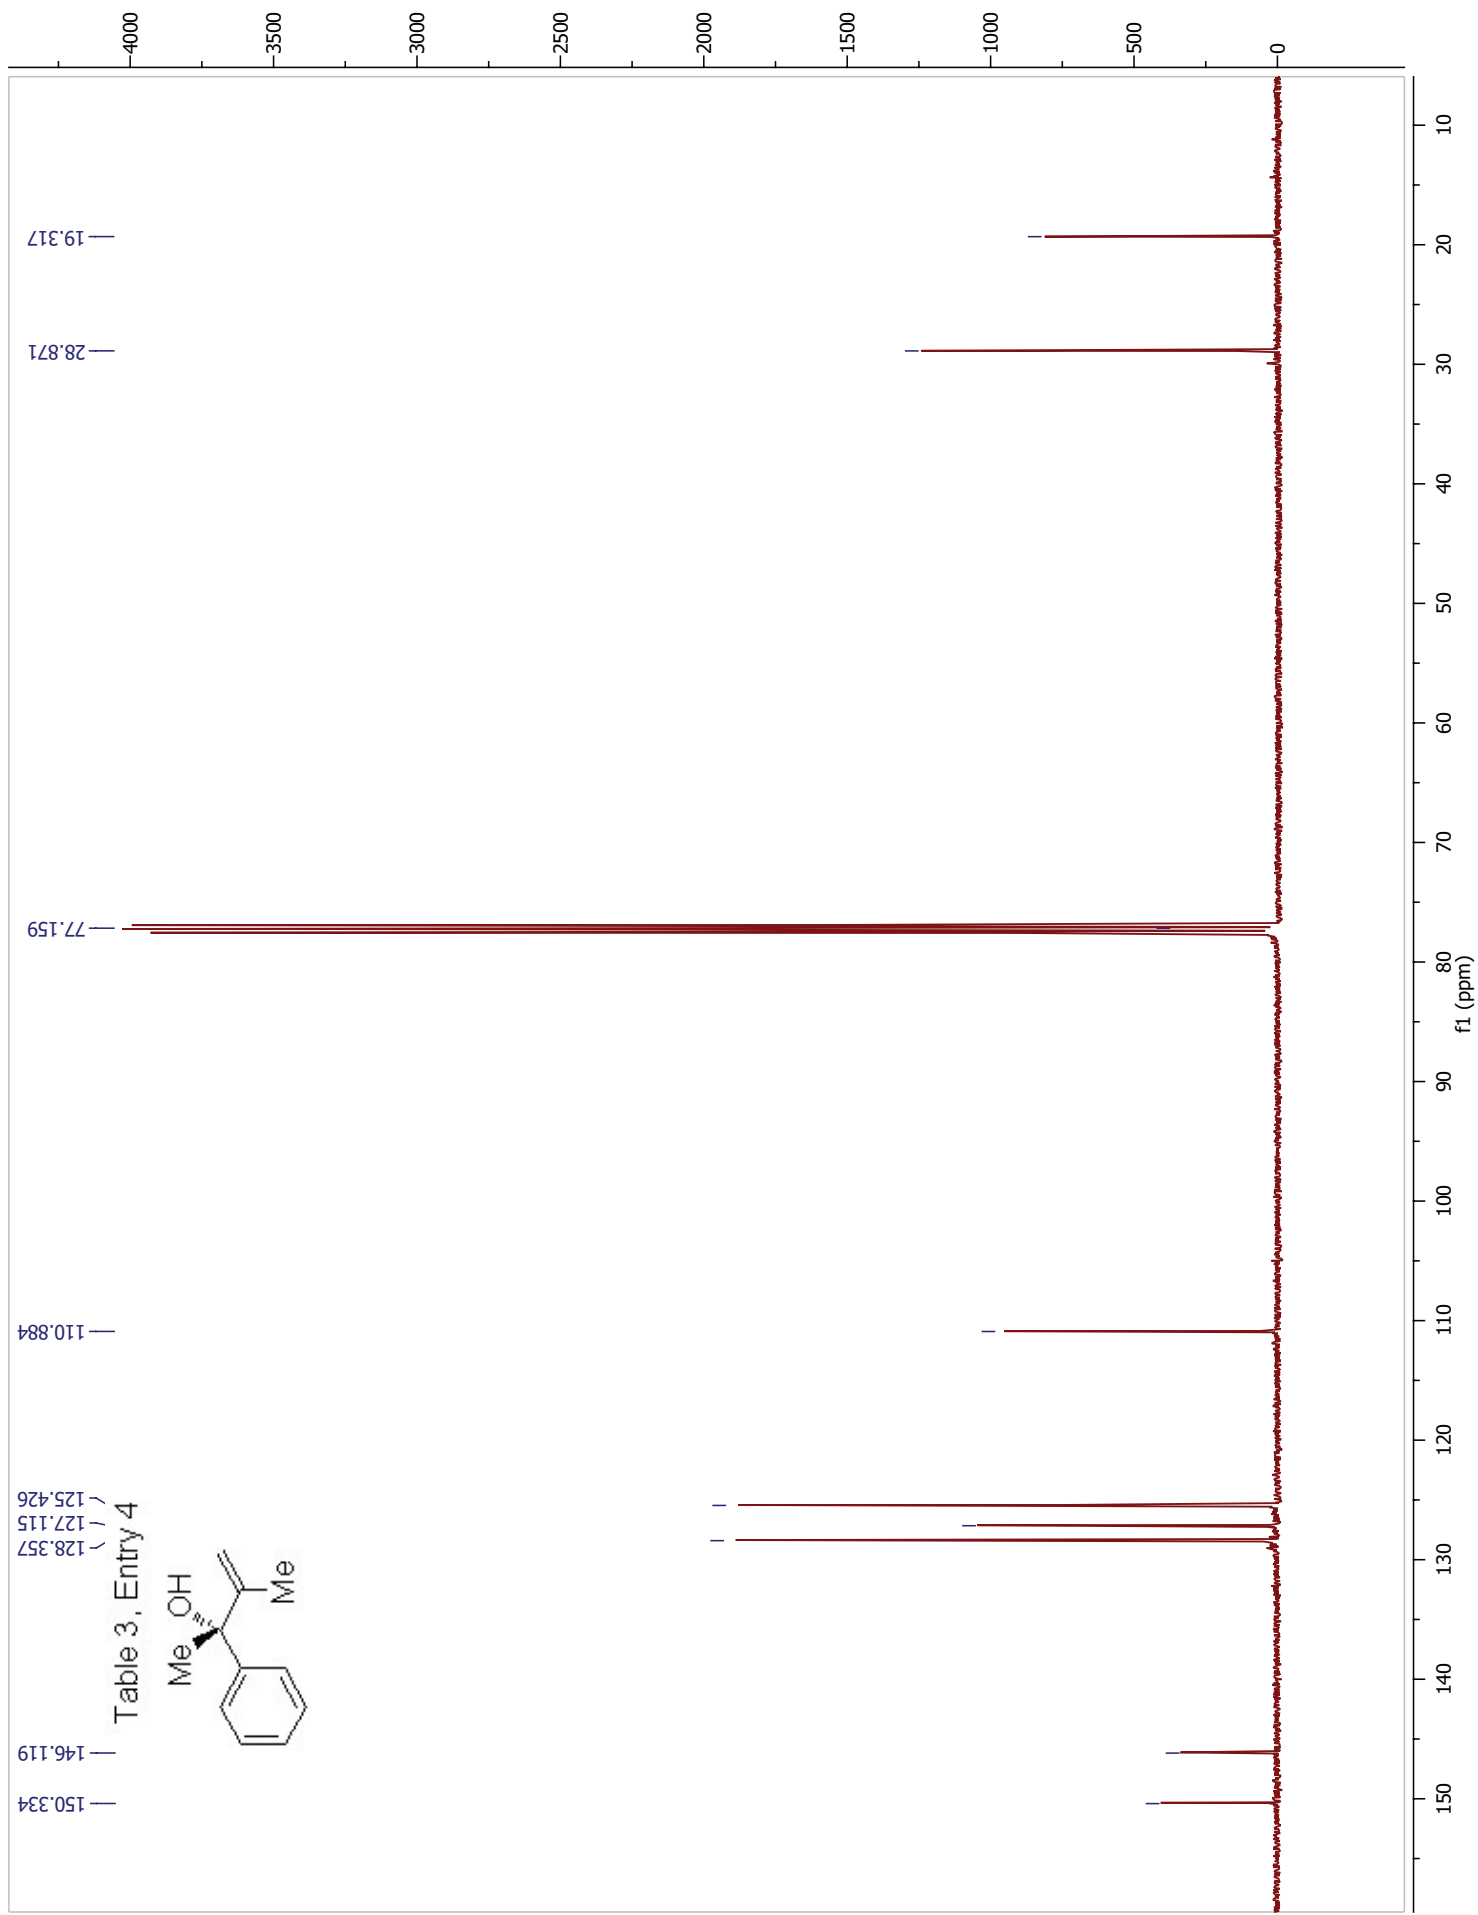

Table 3, Entry 4

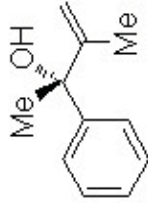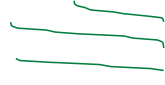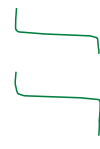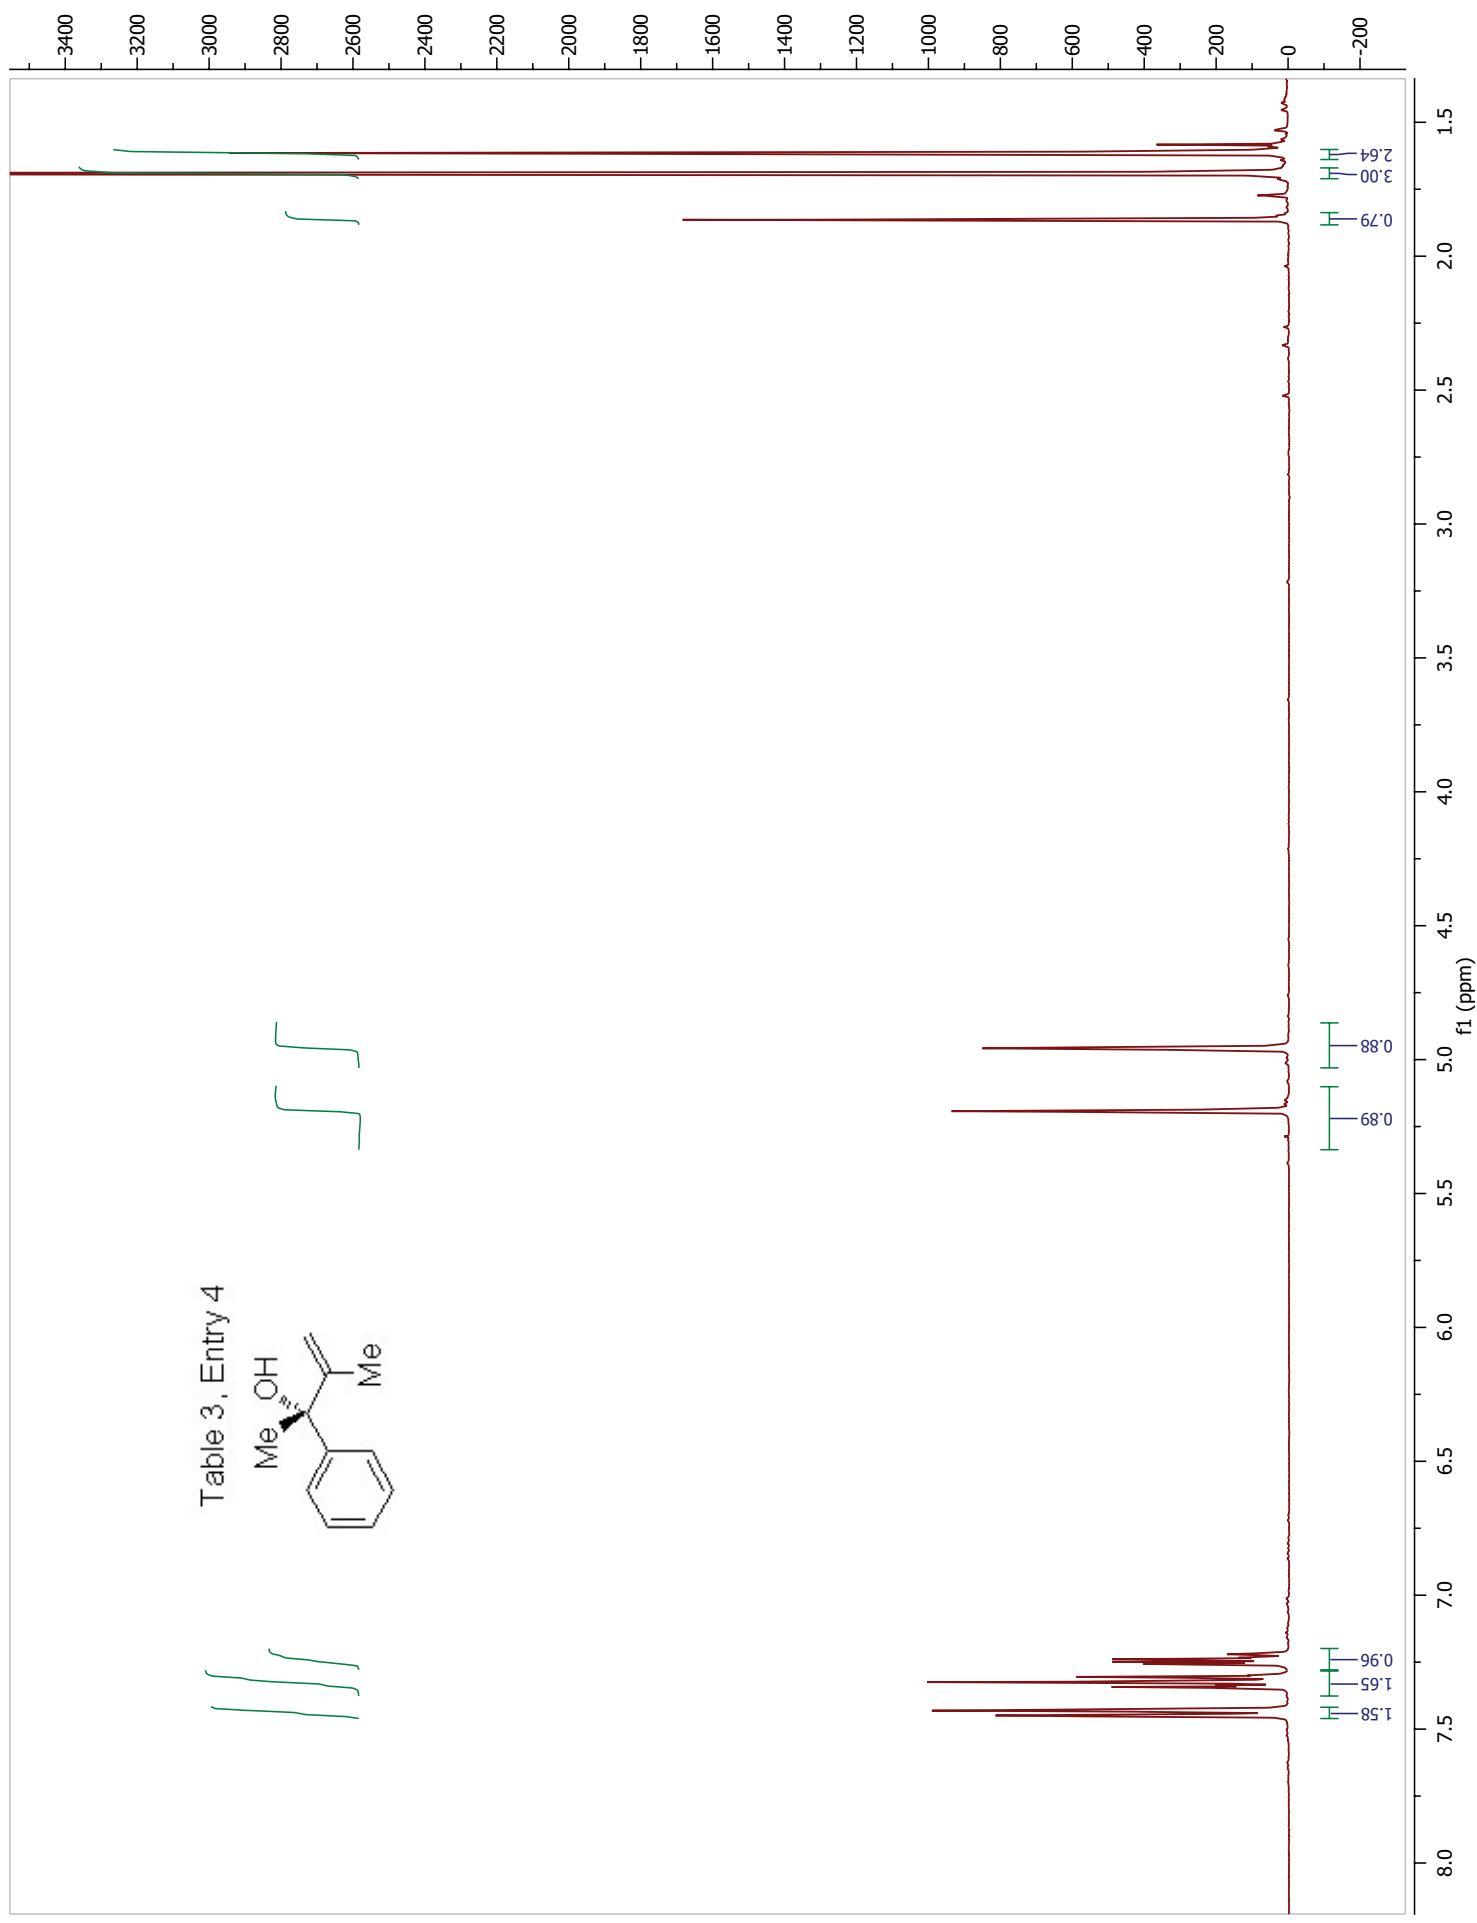

Table 3, Entry 5

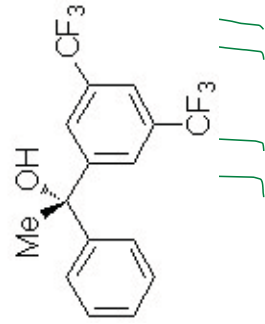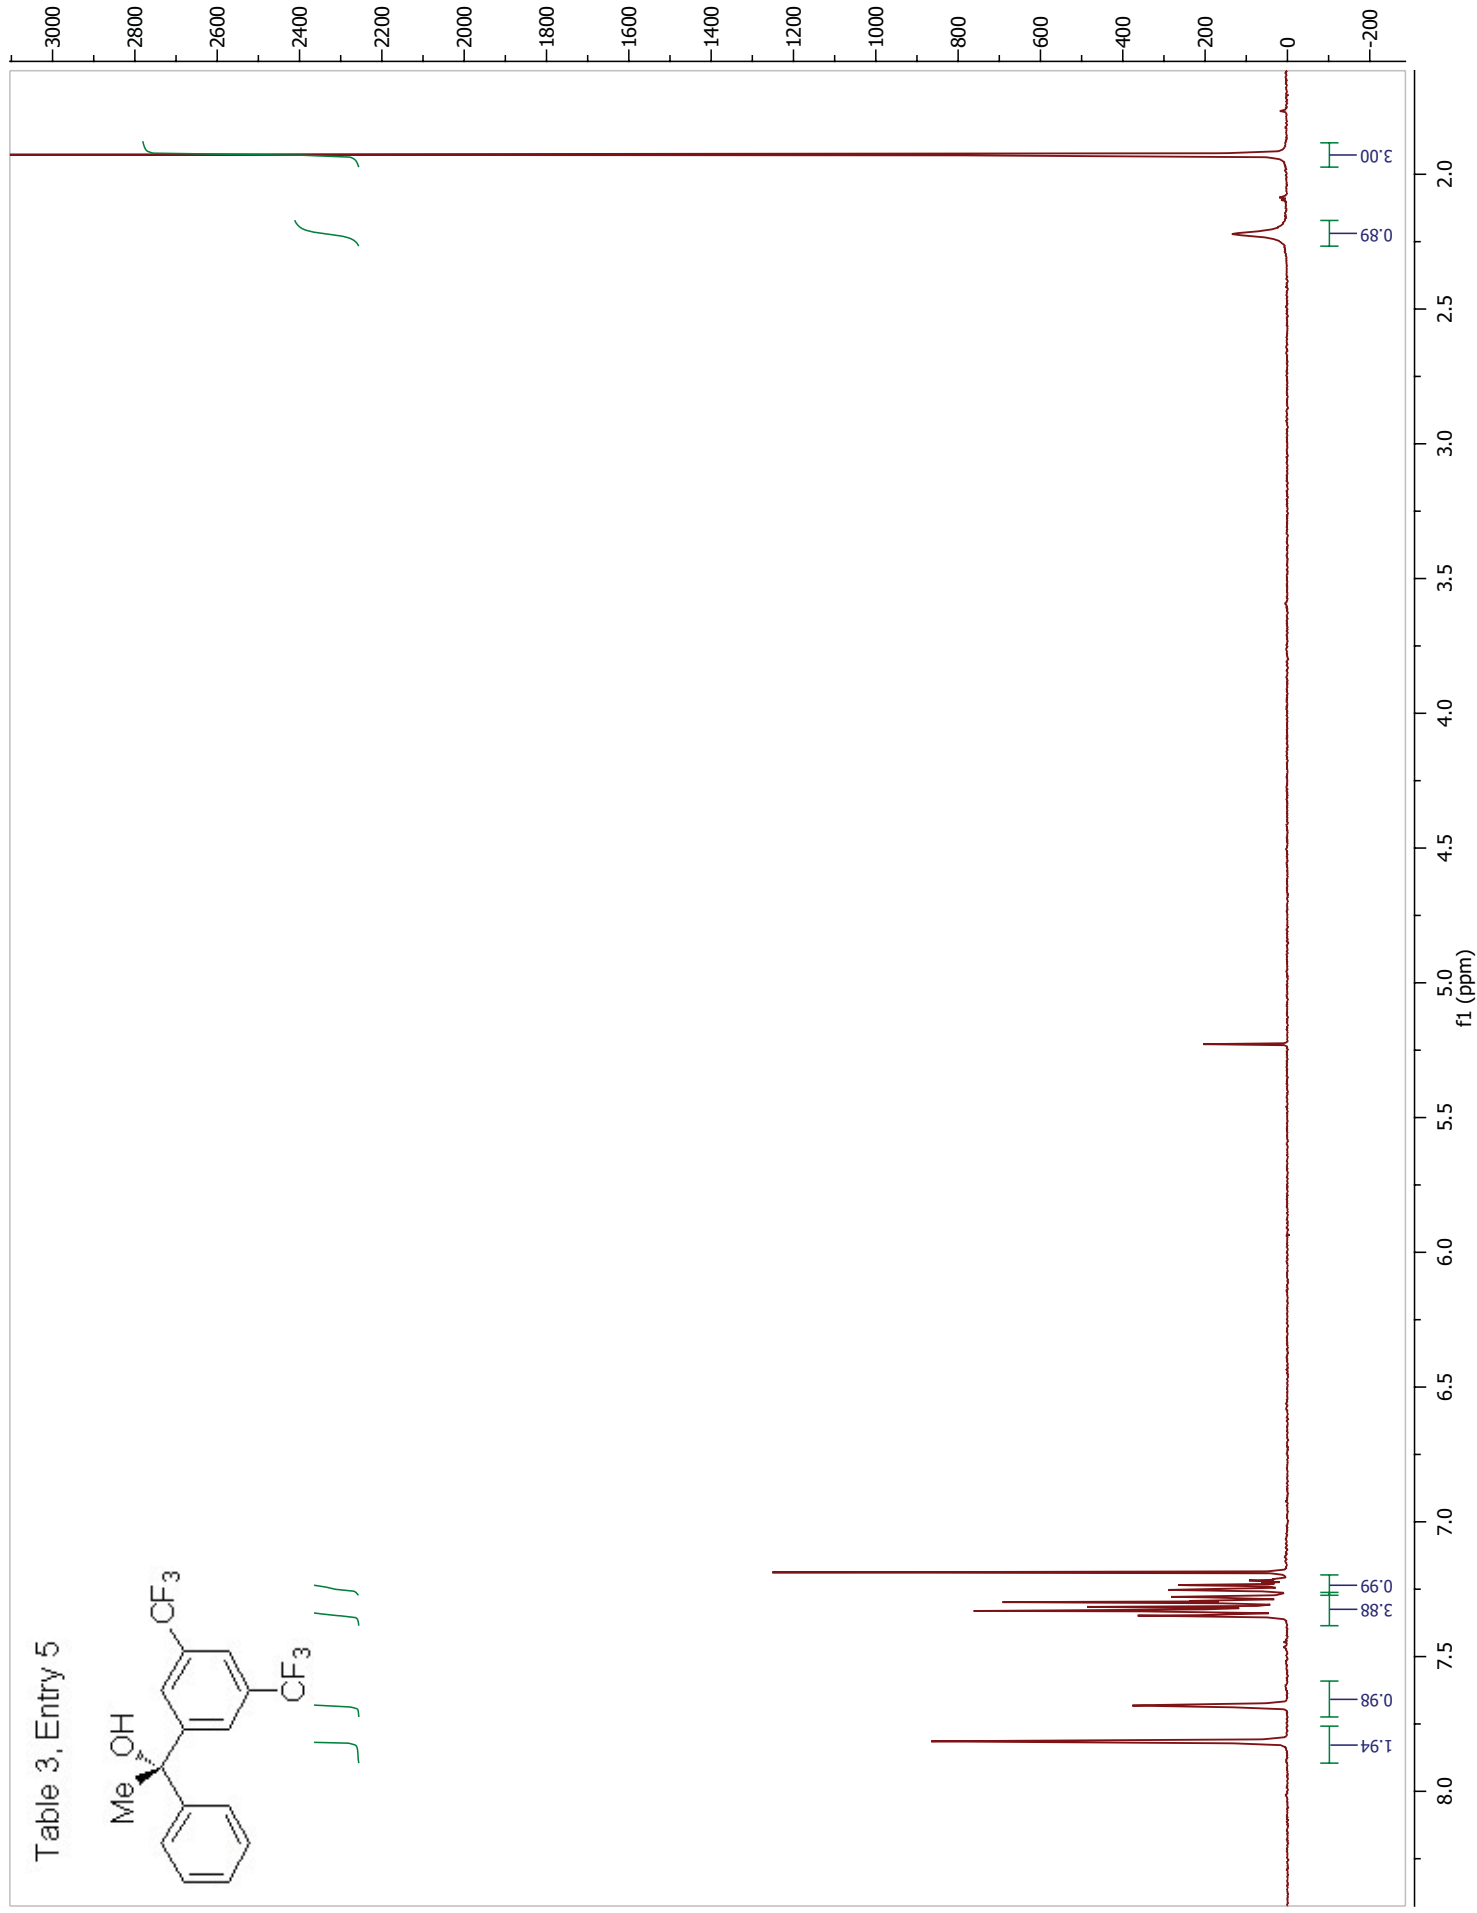

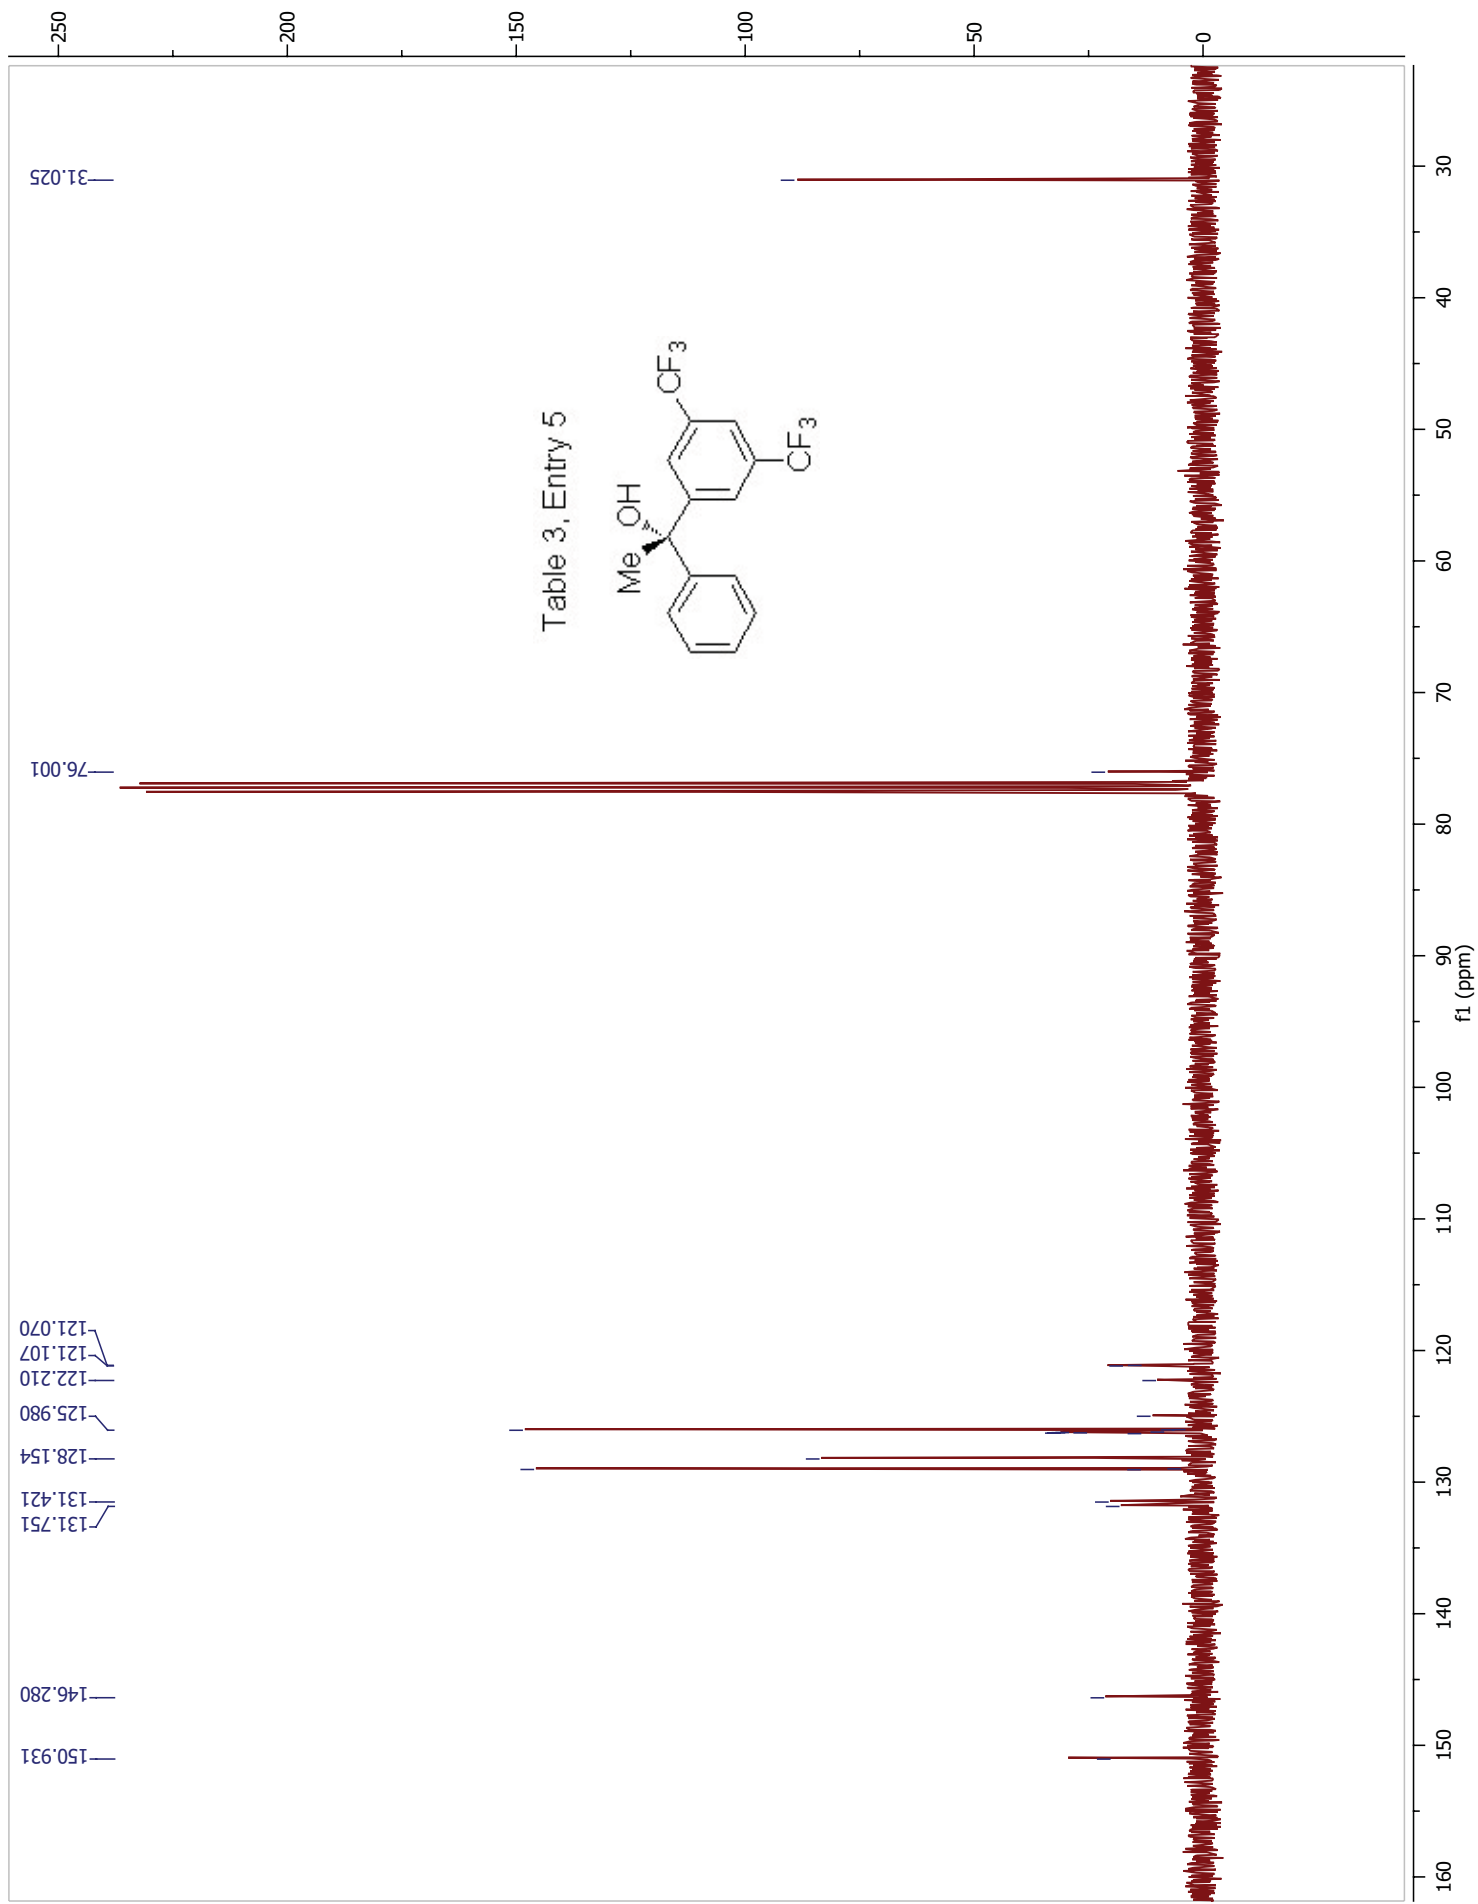

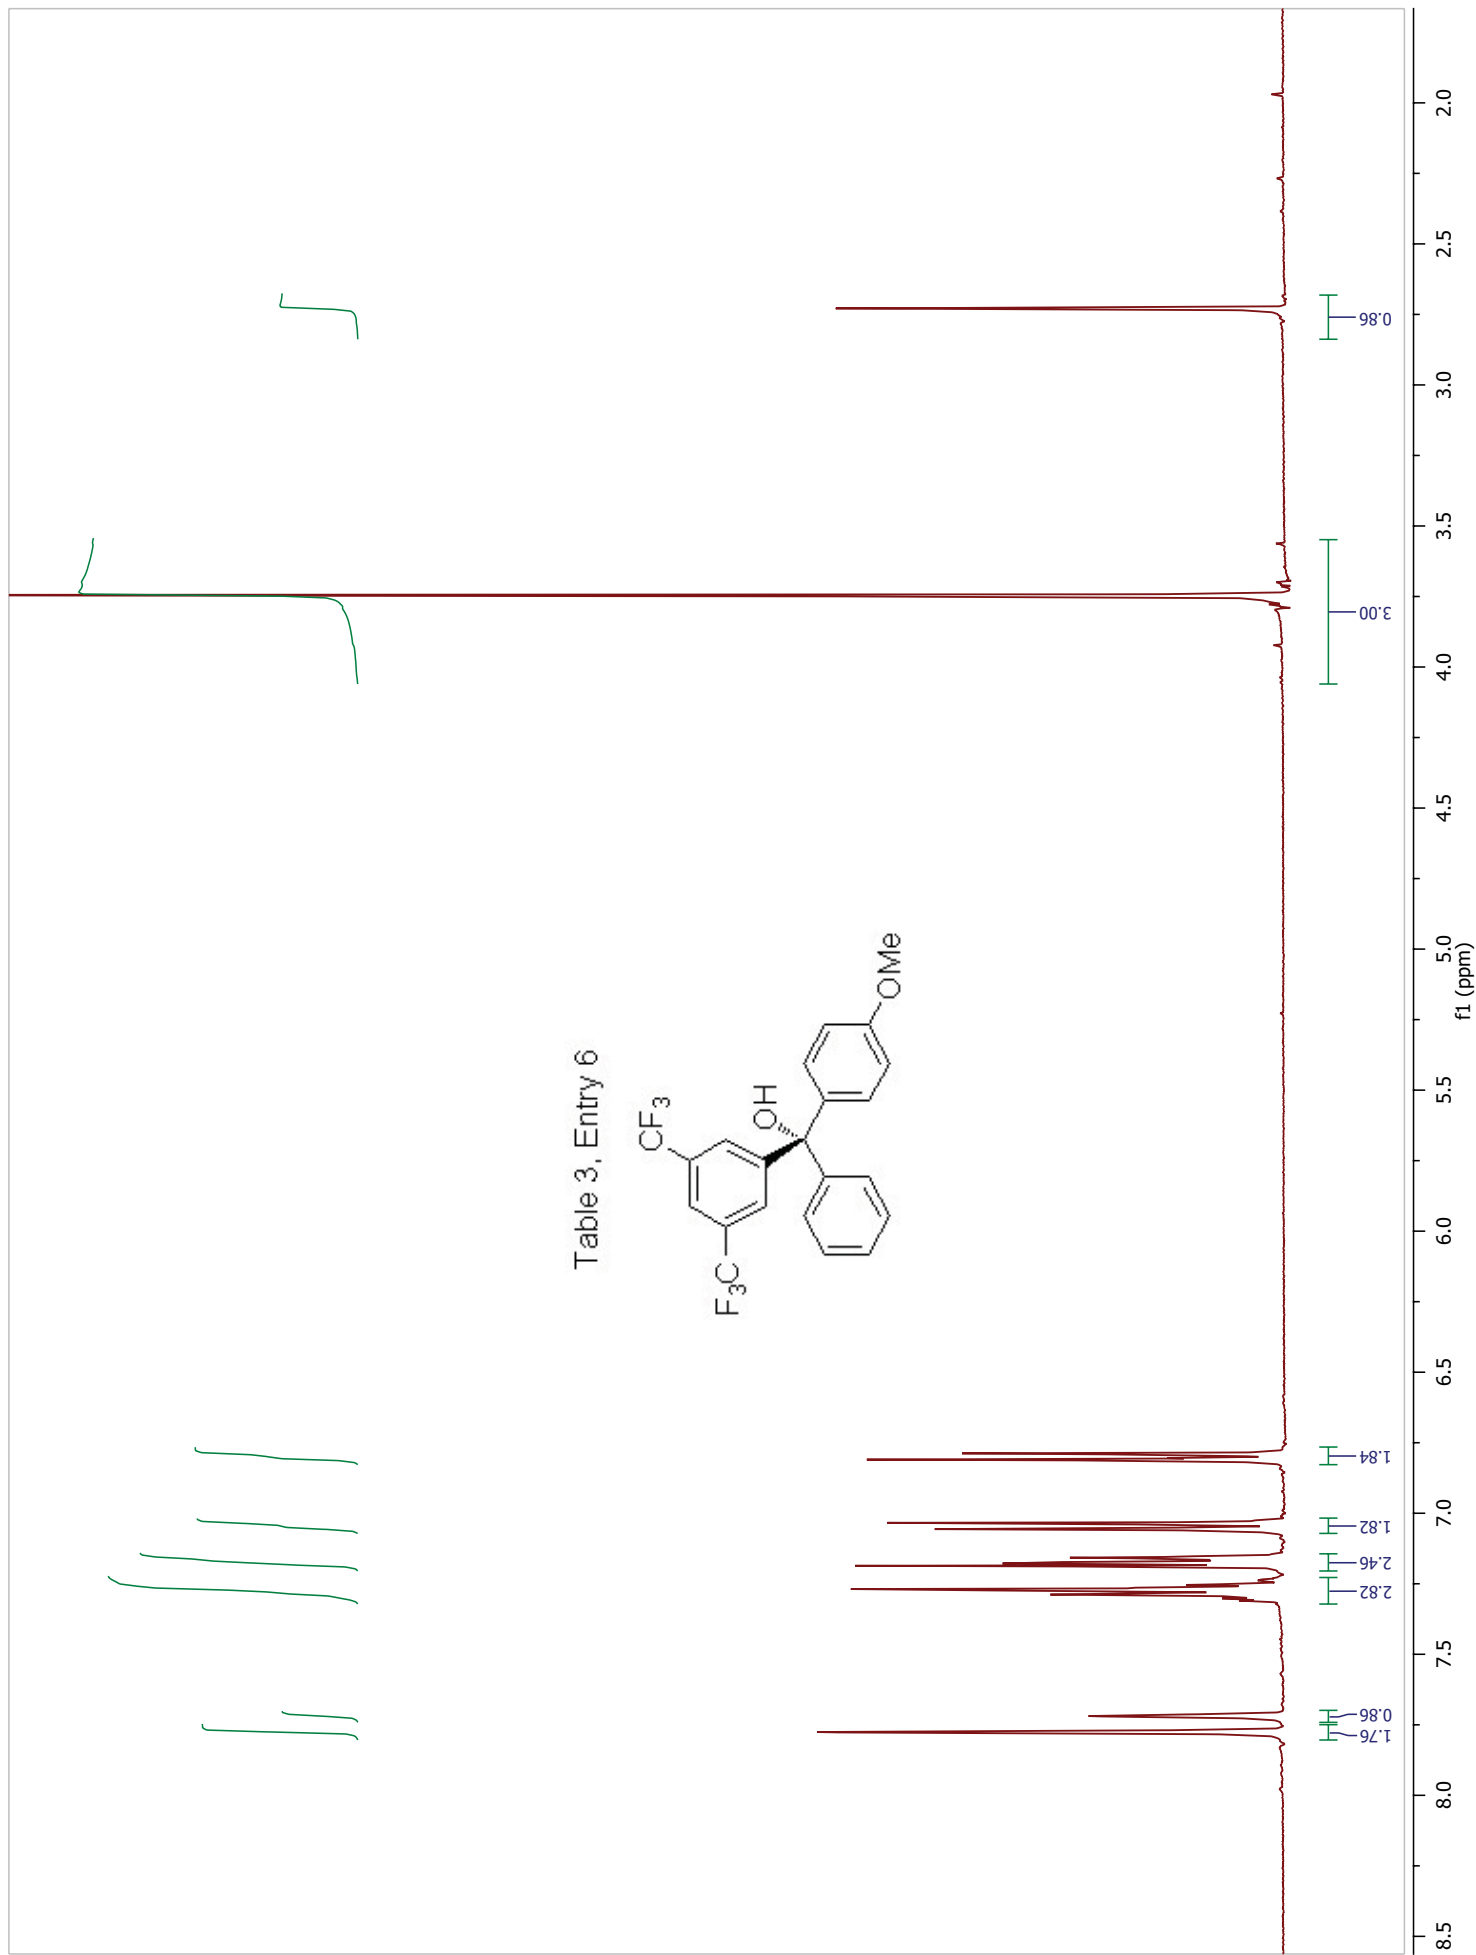

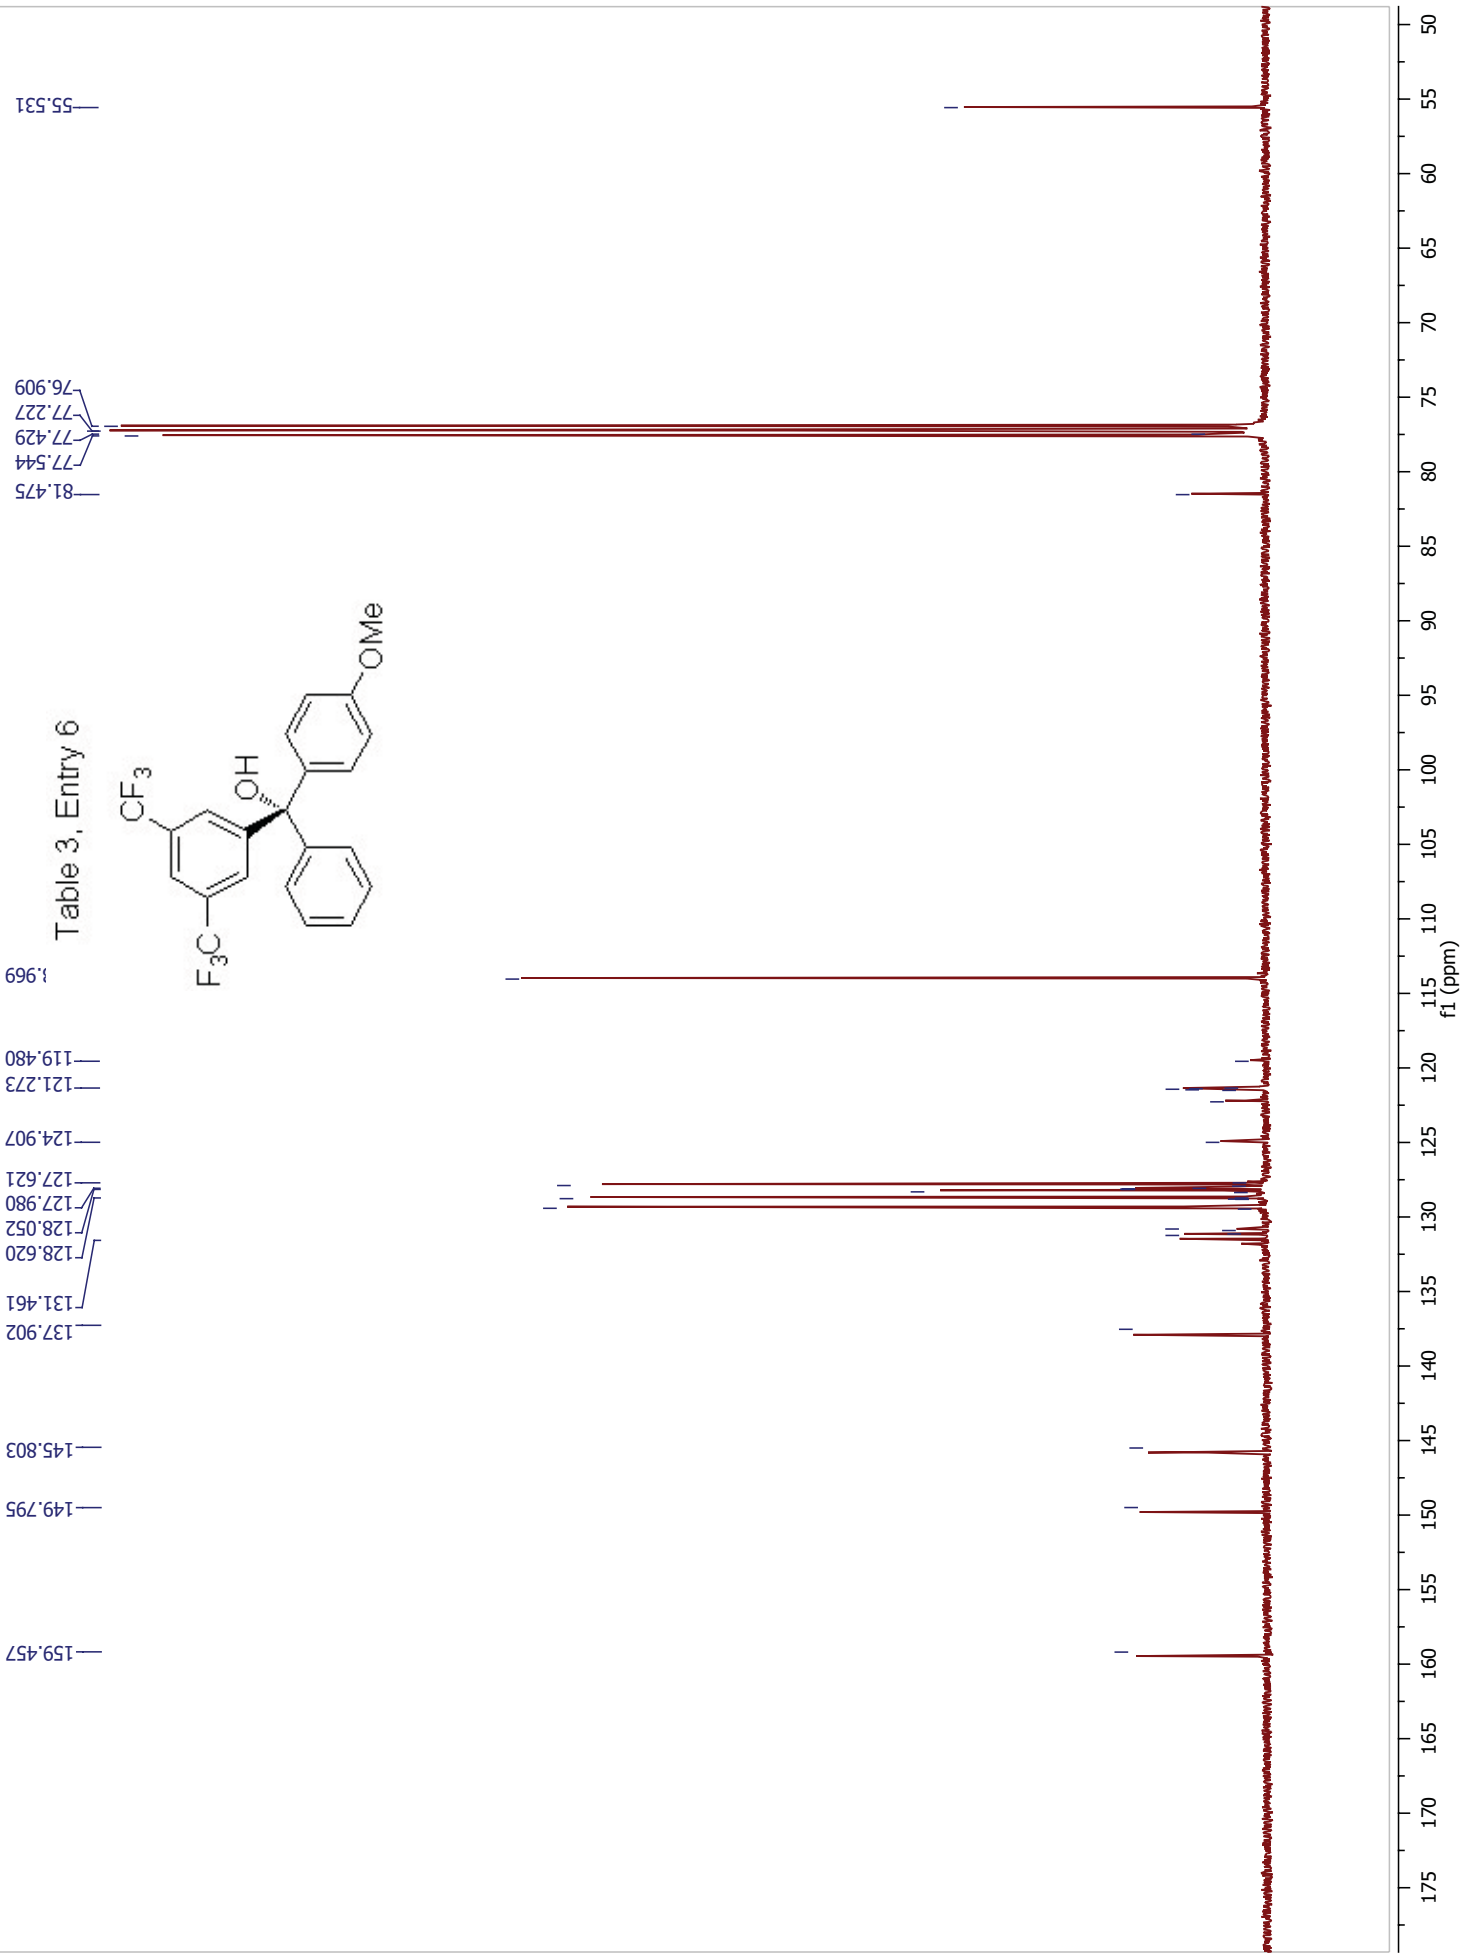

Table 3, Entry 7

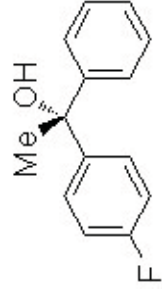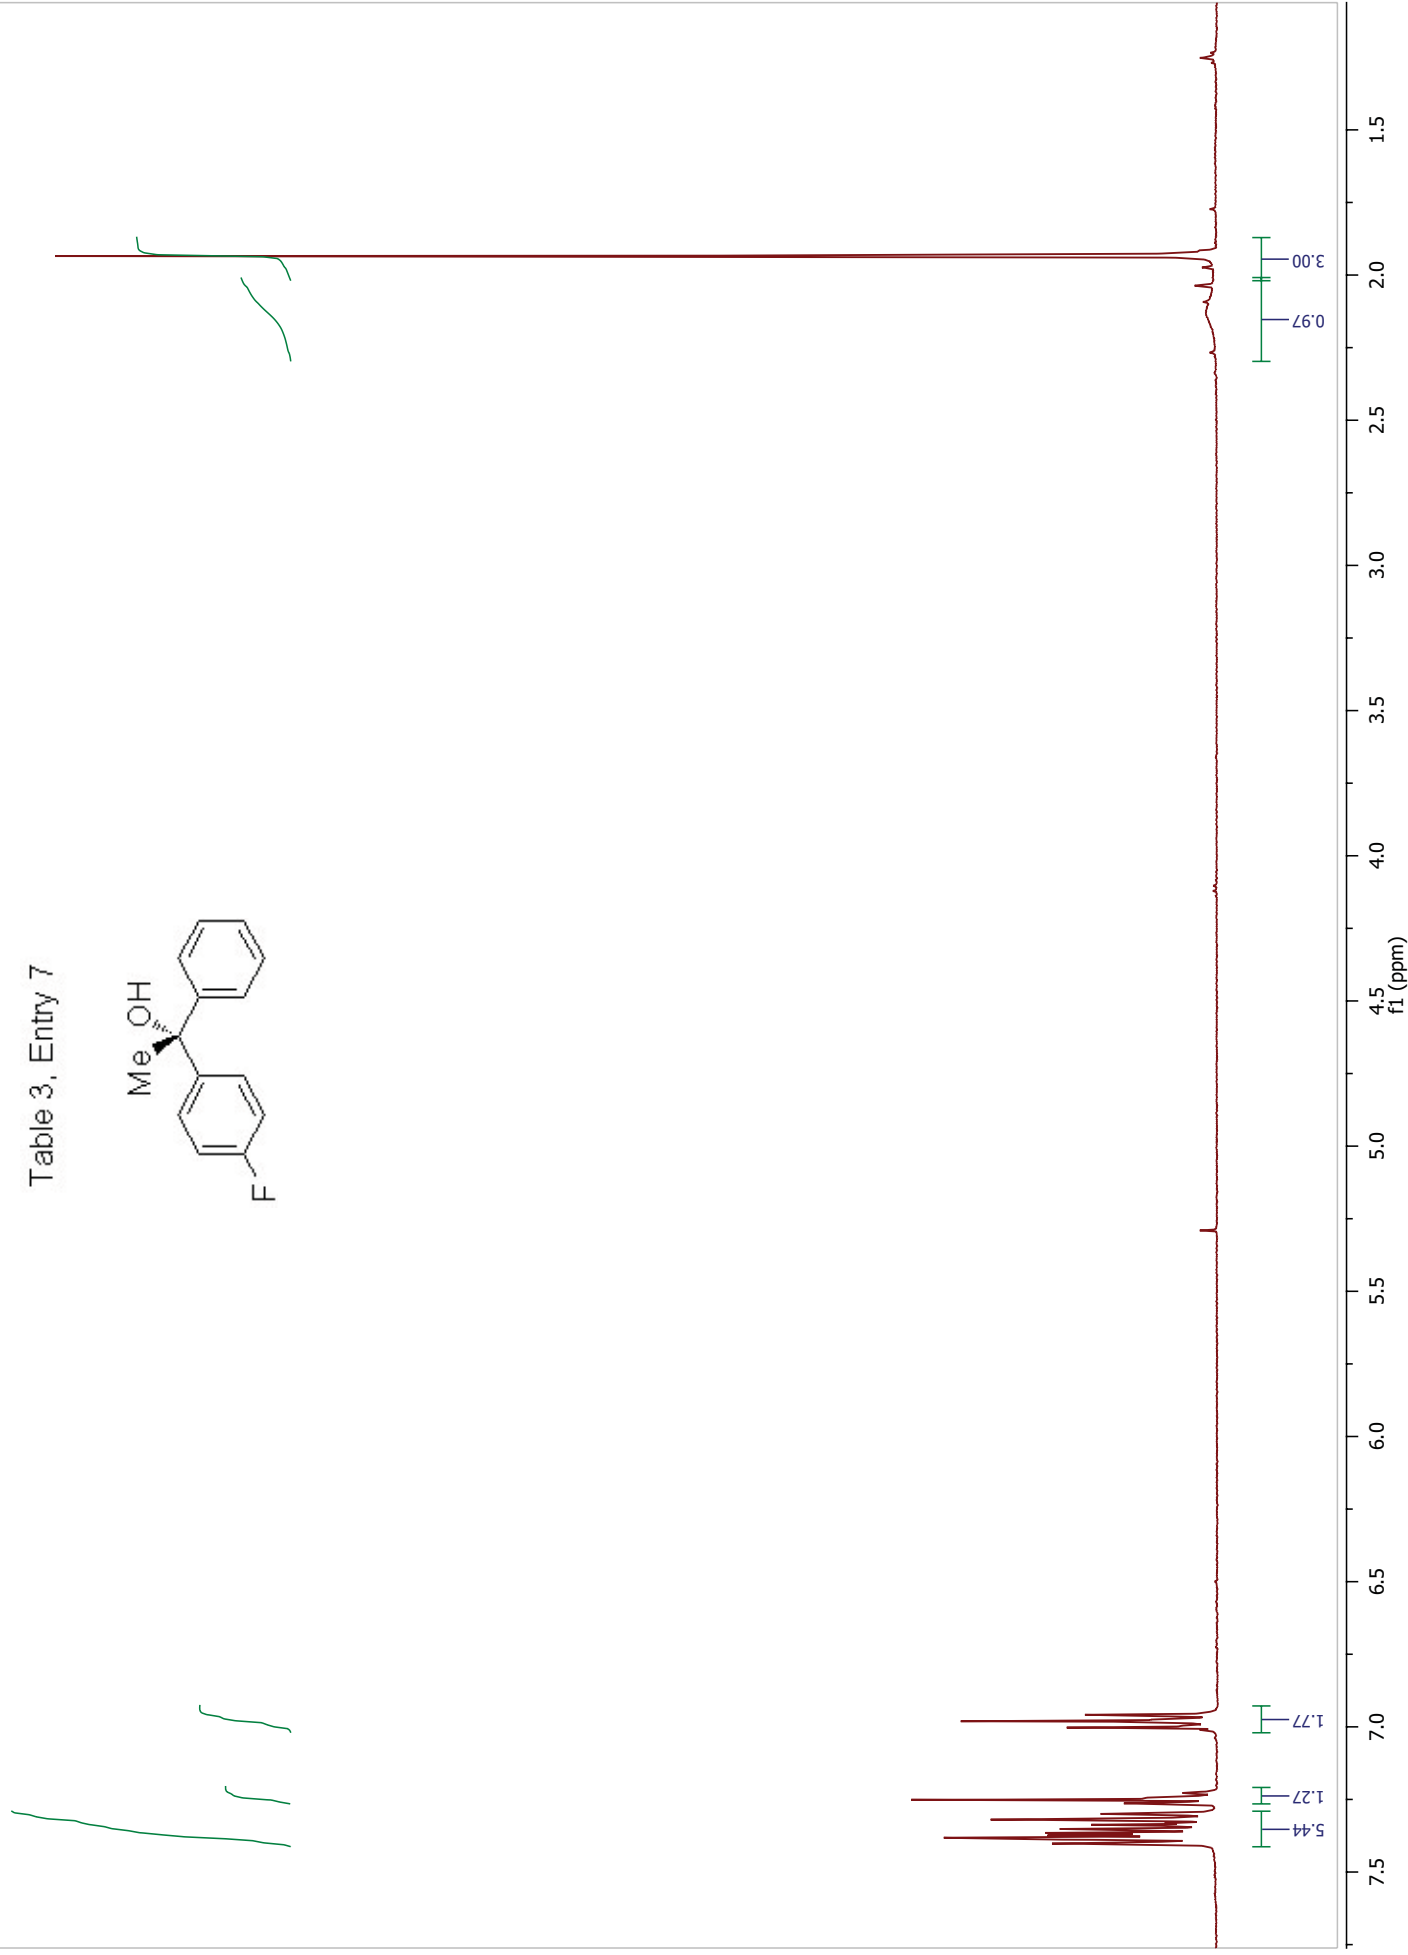



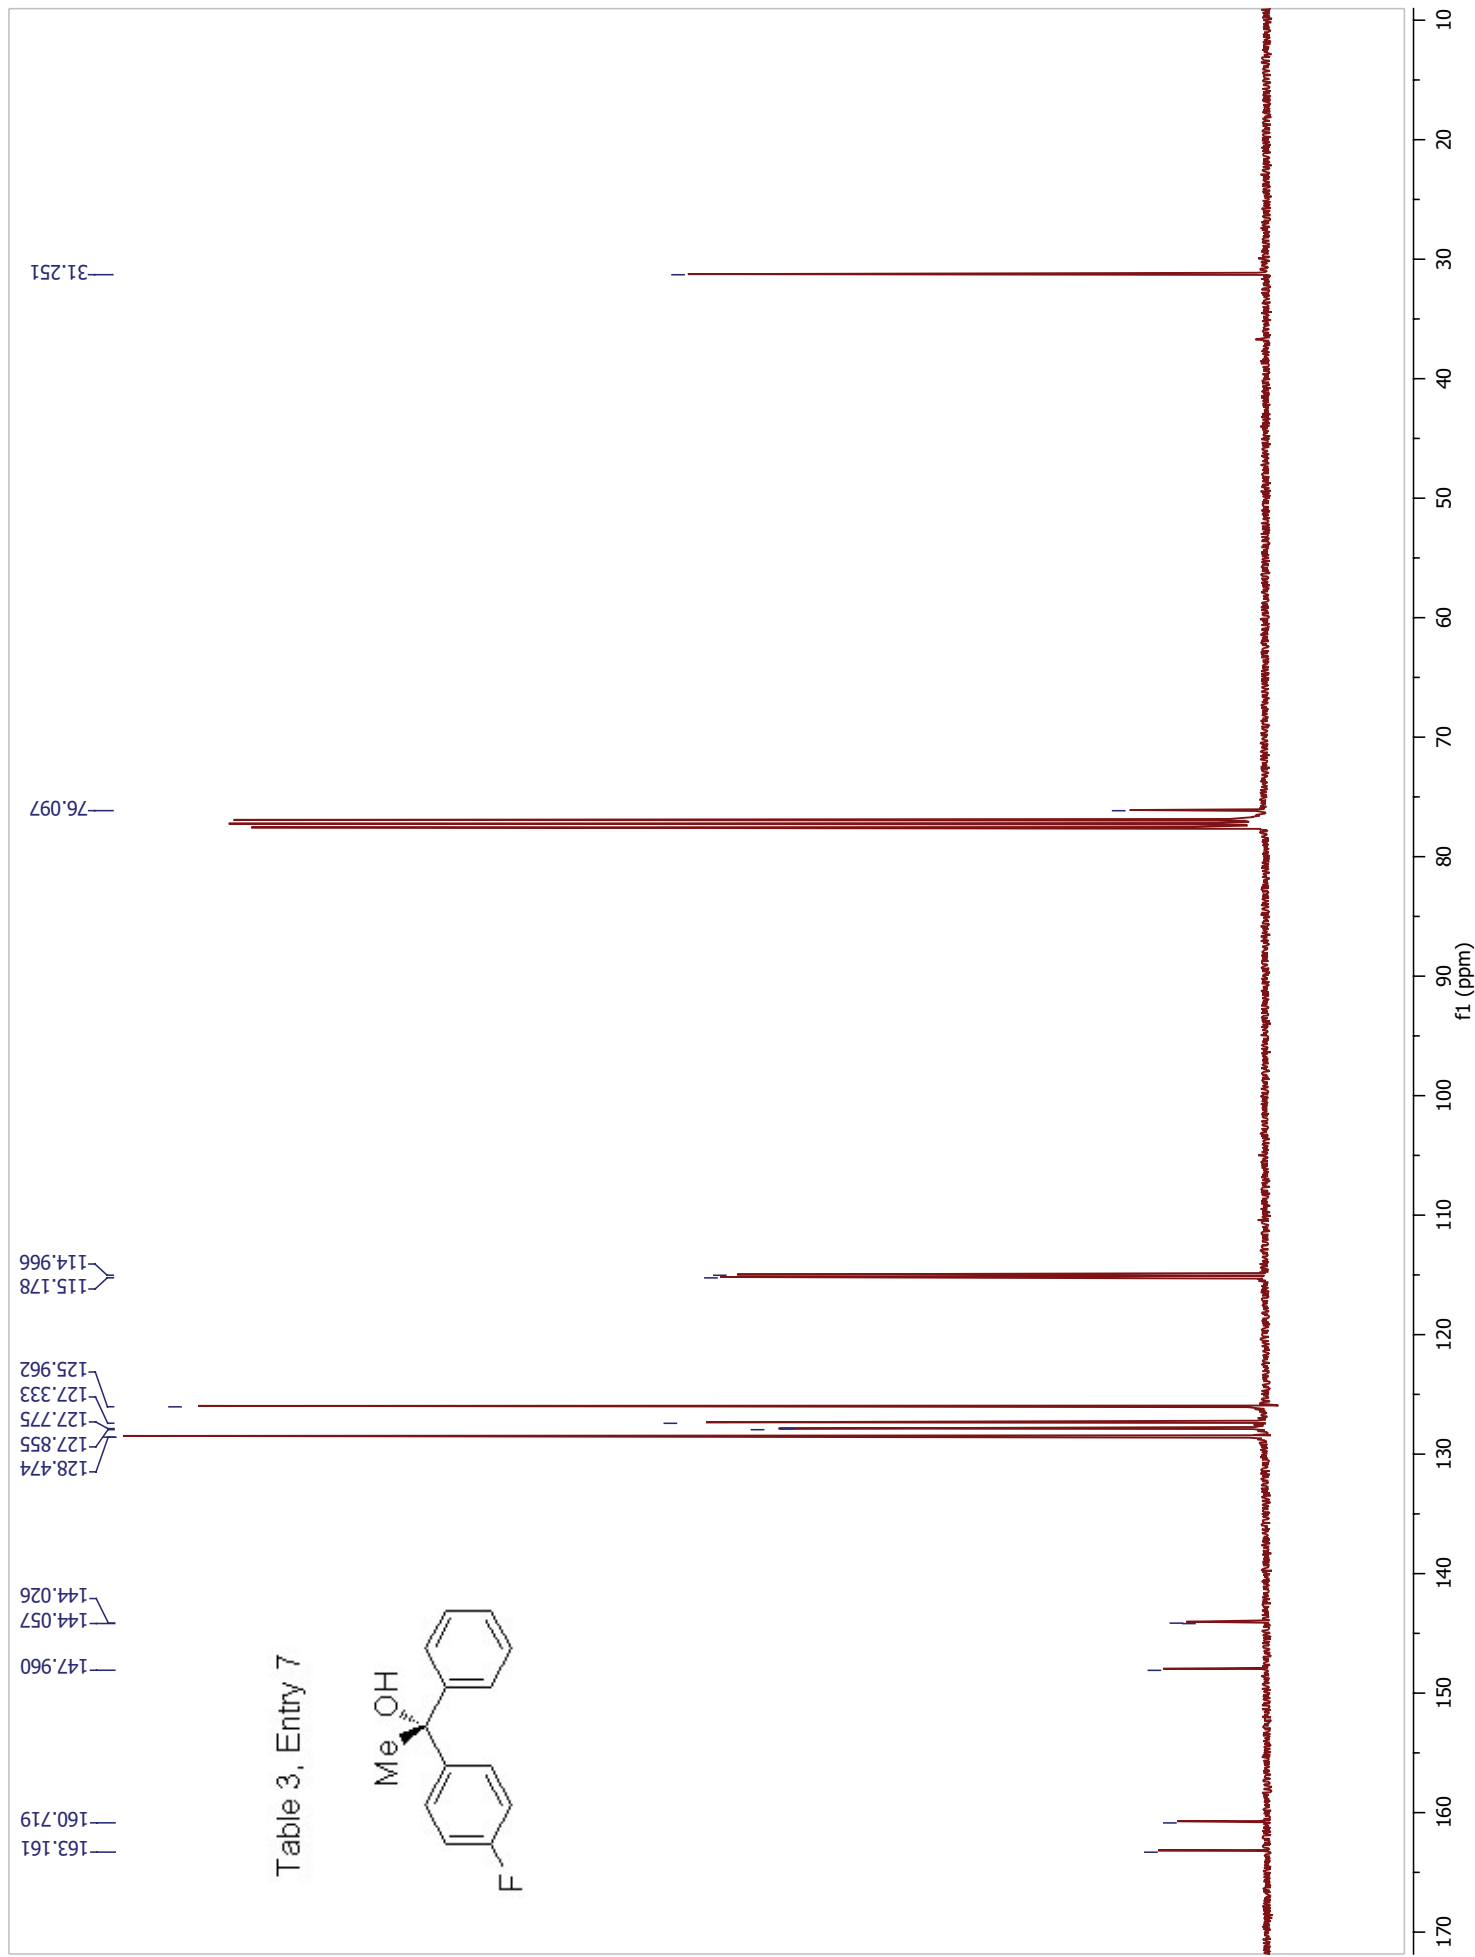

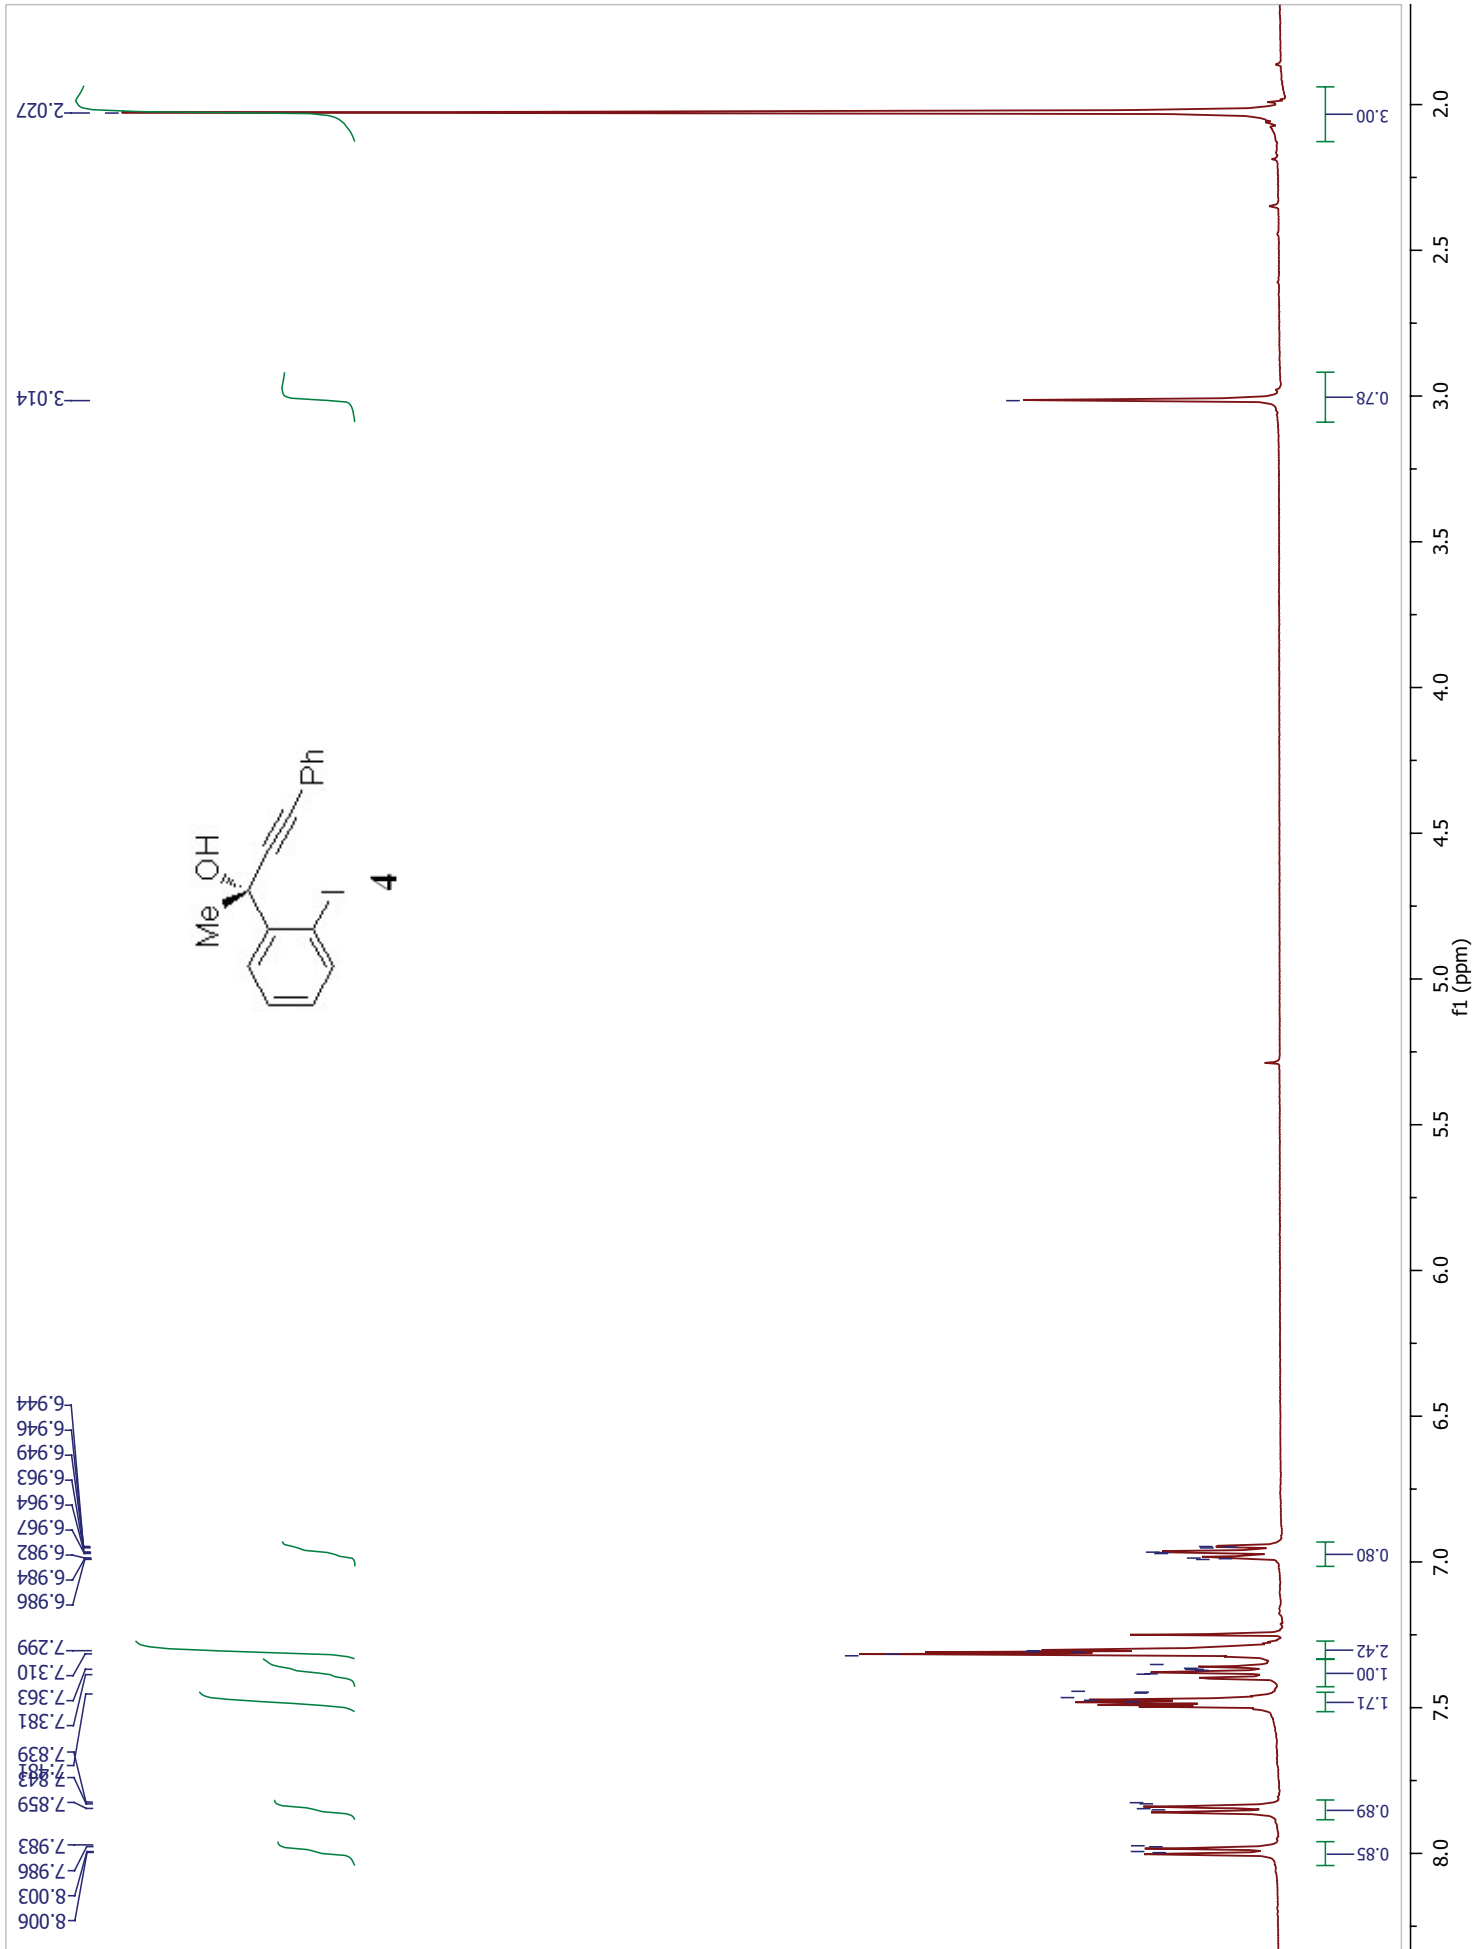

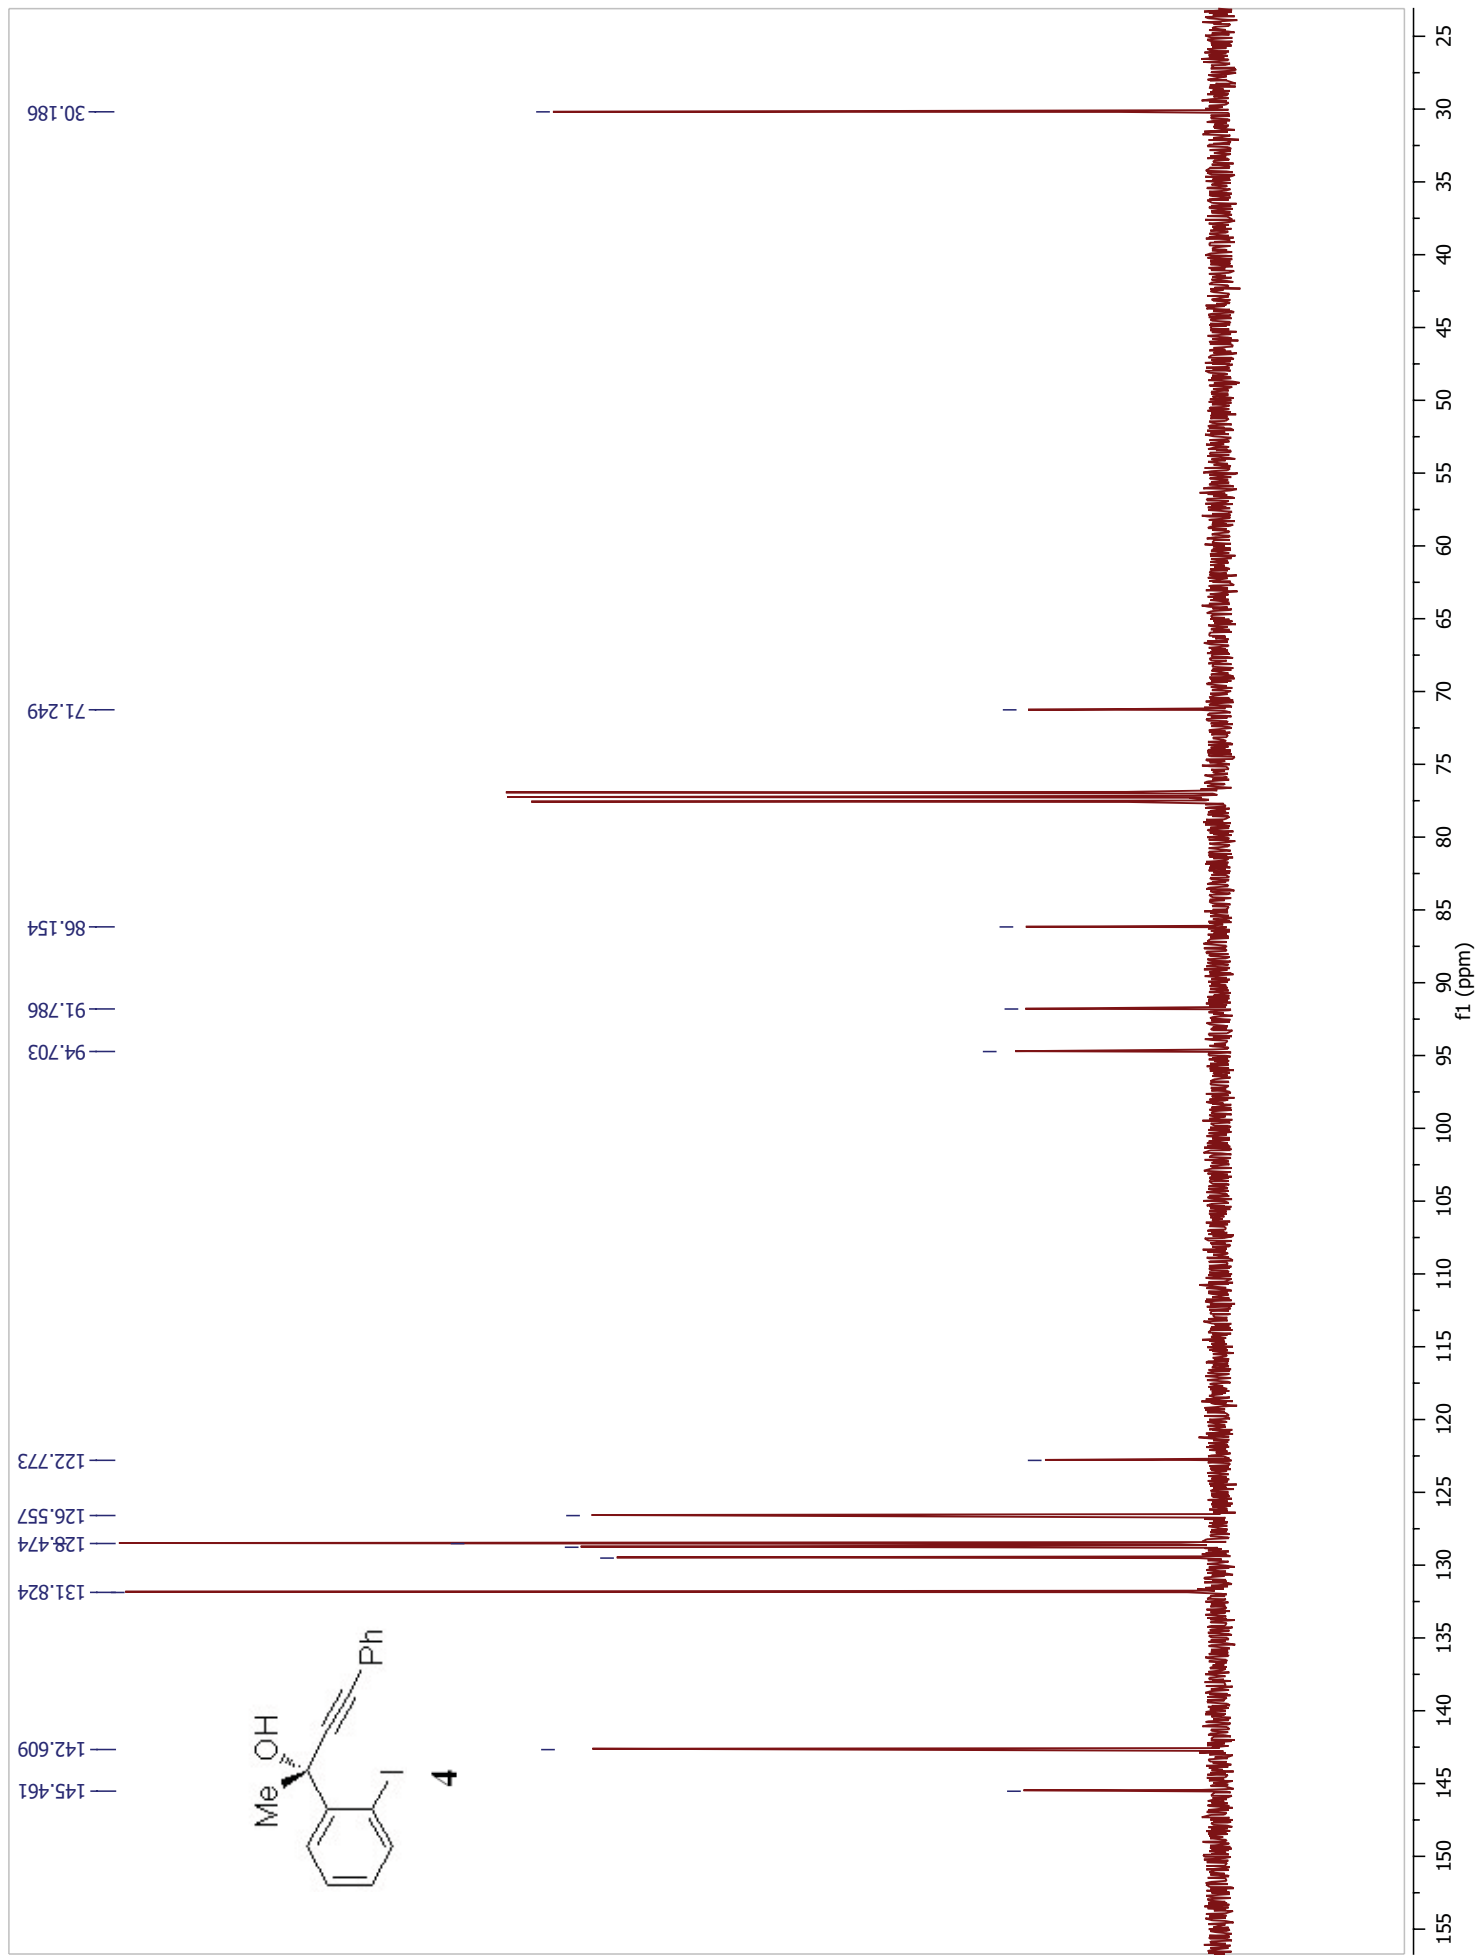

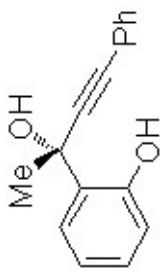

6

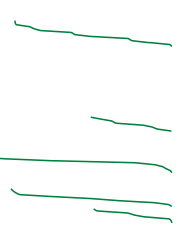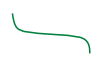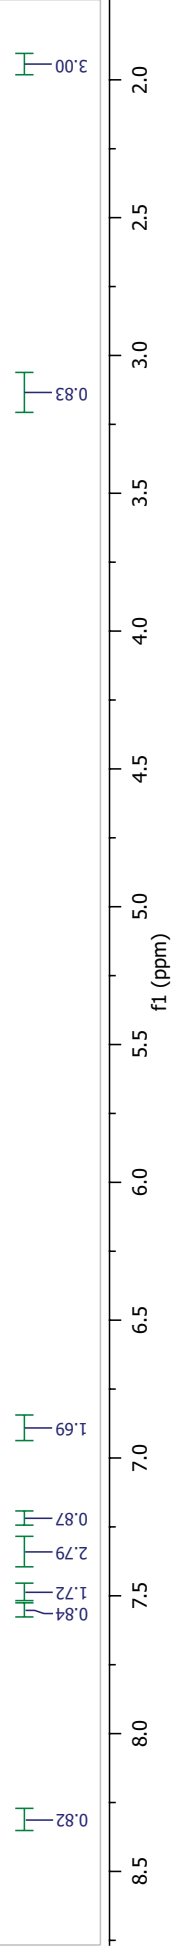

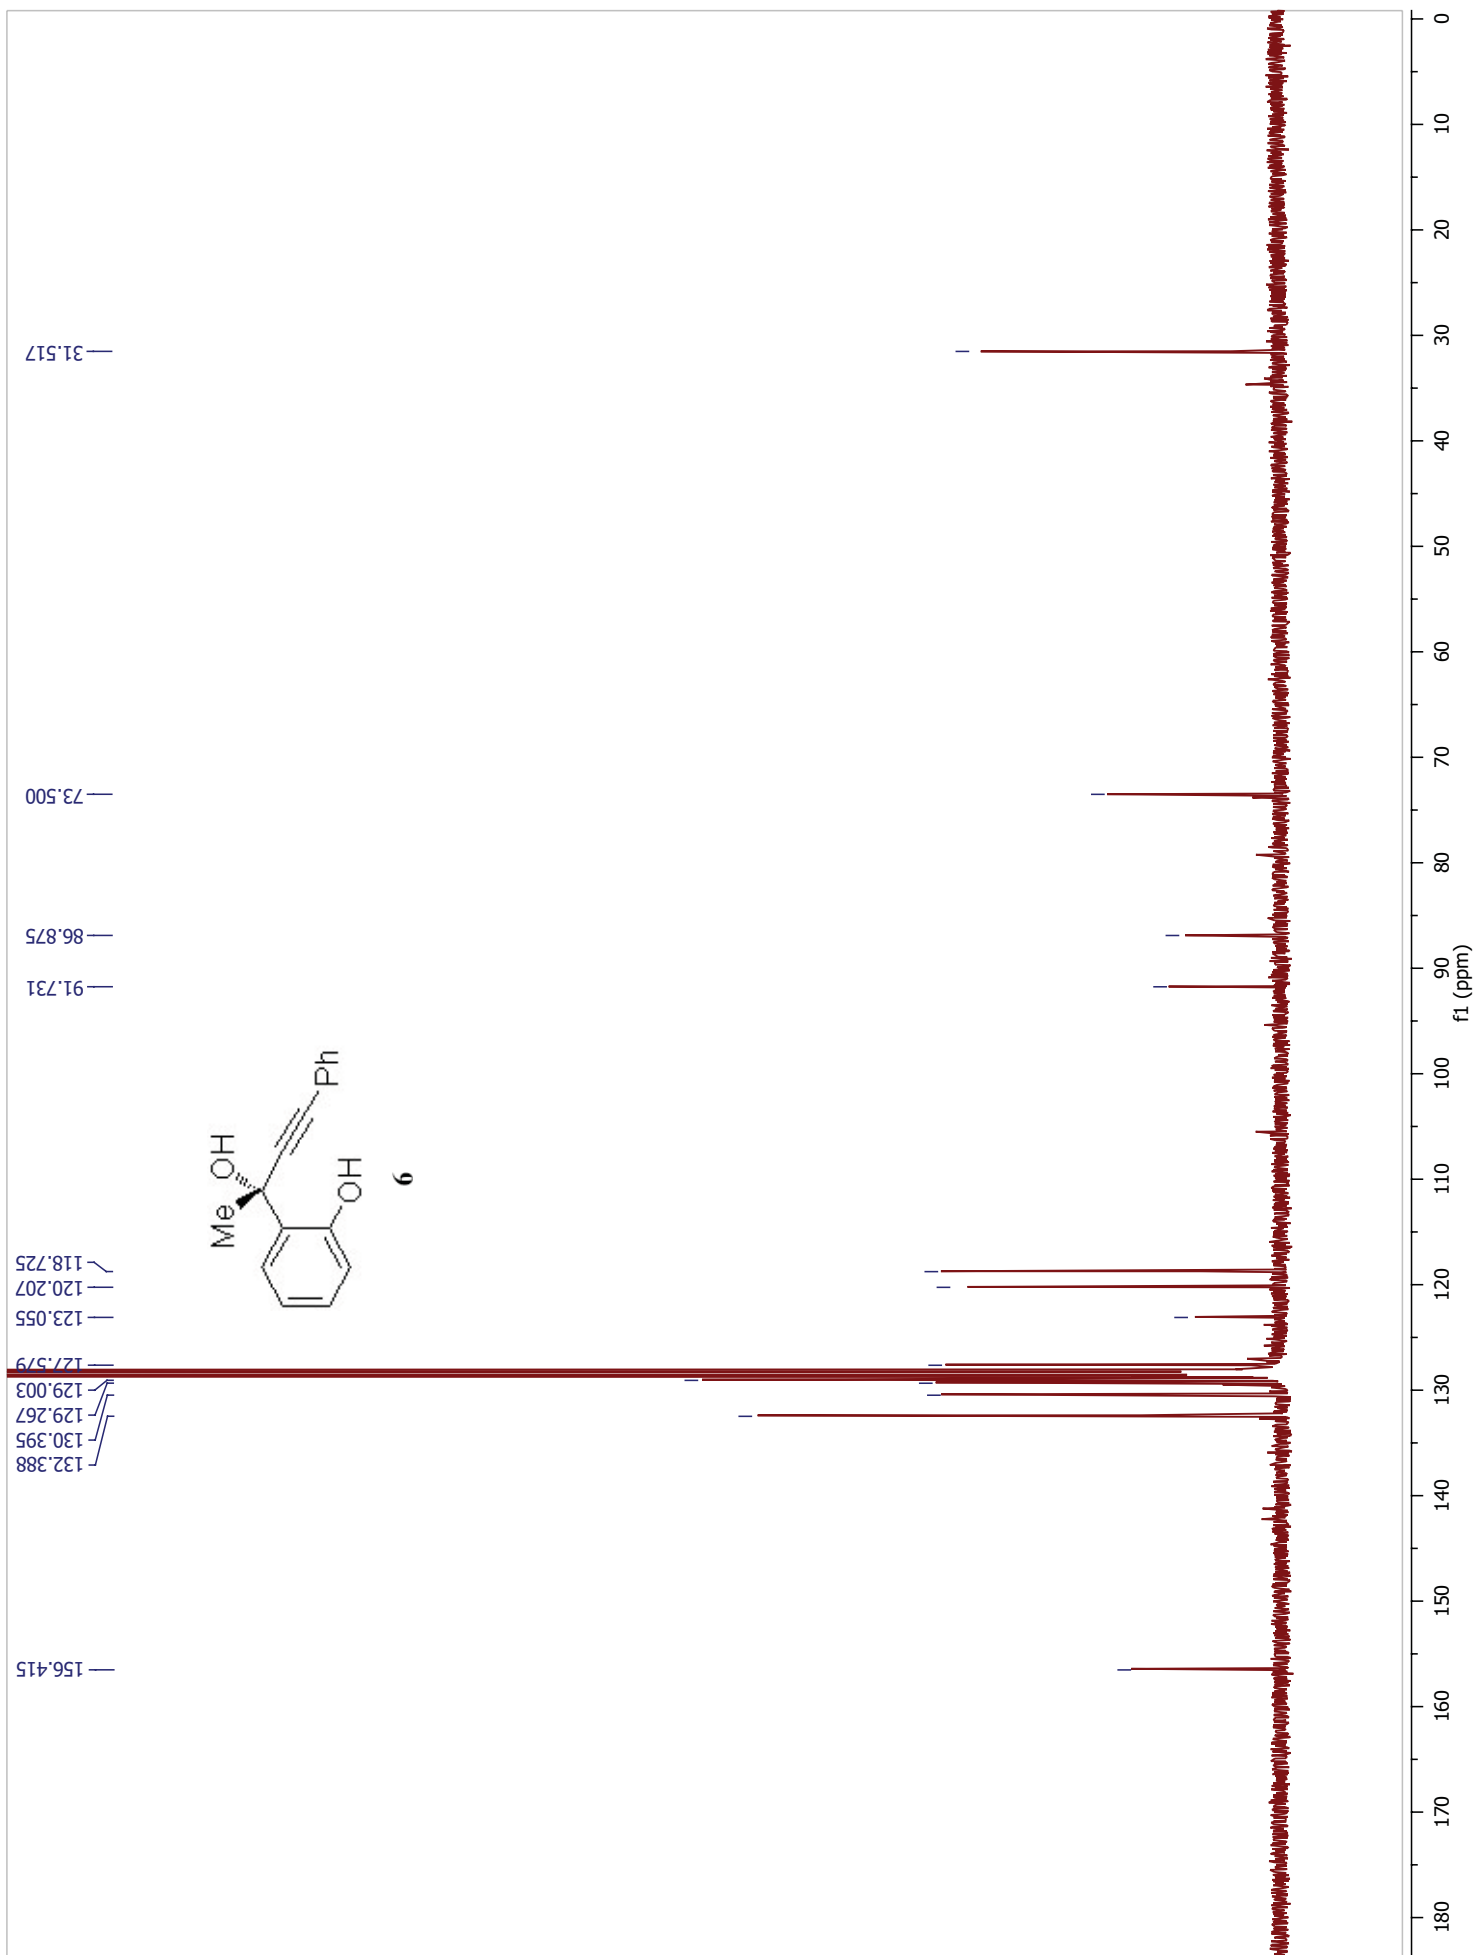

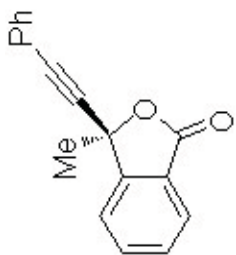

5

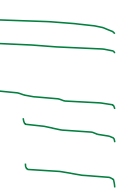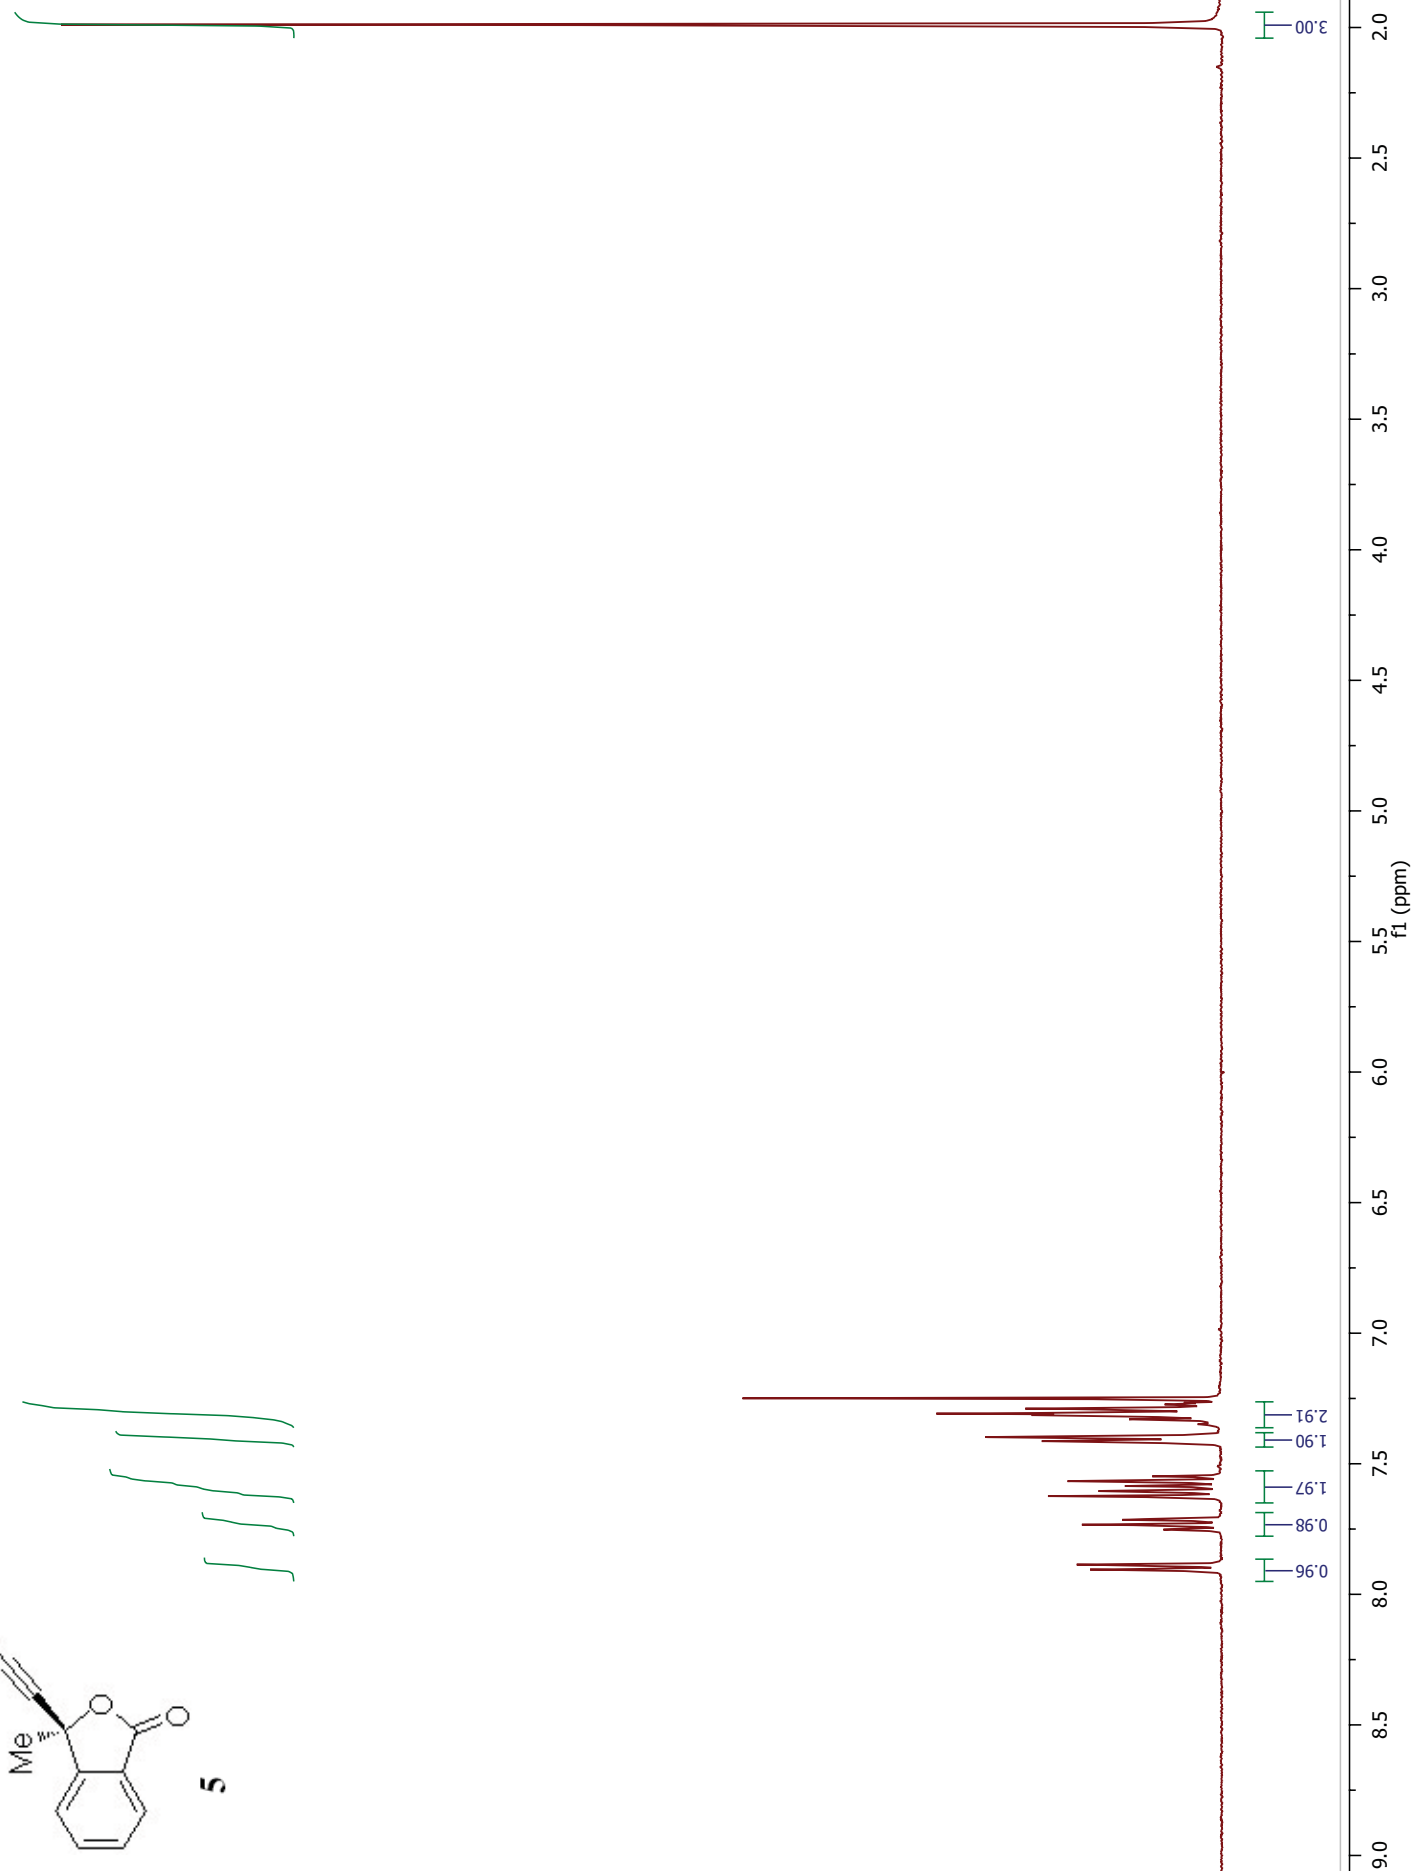

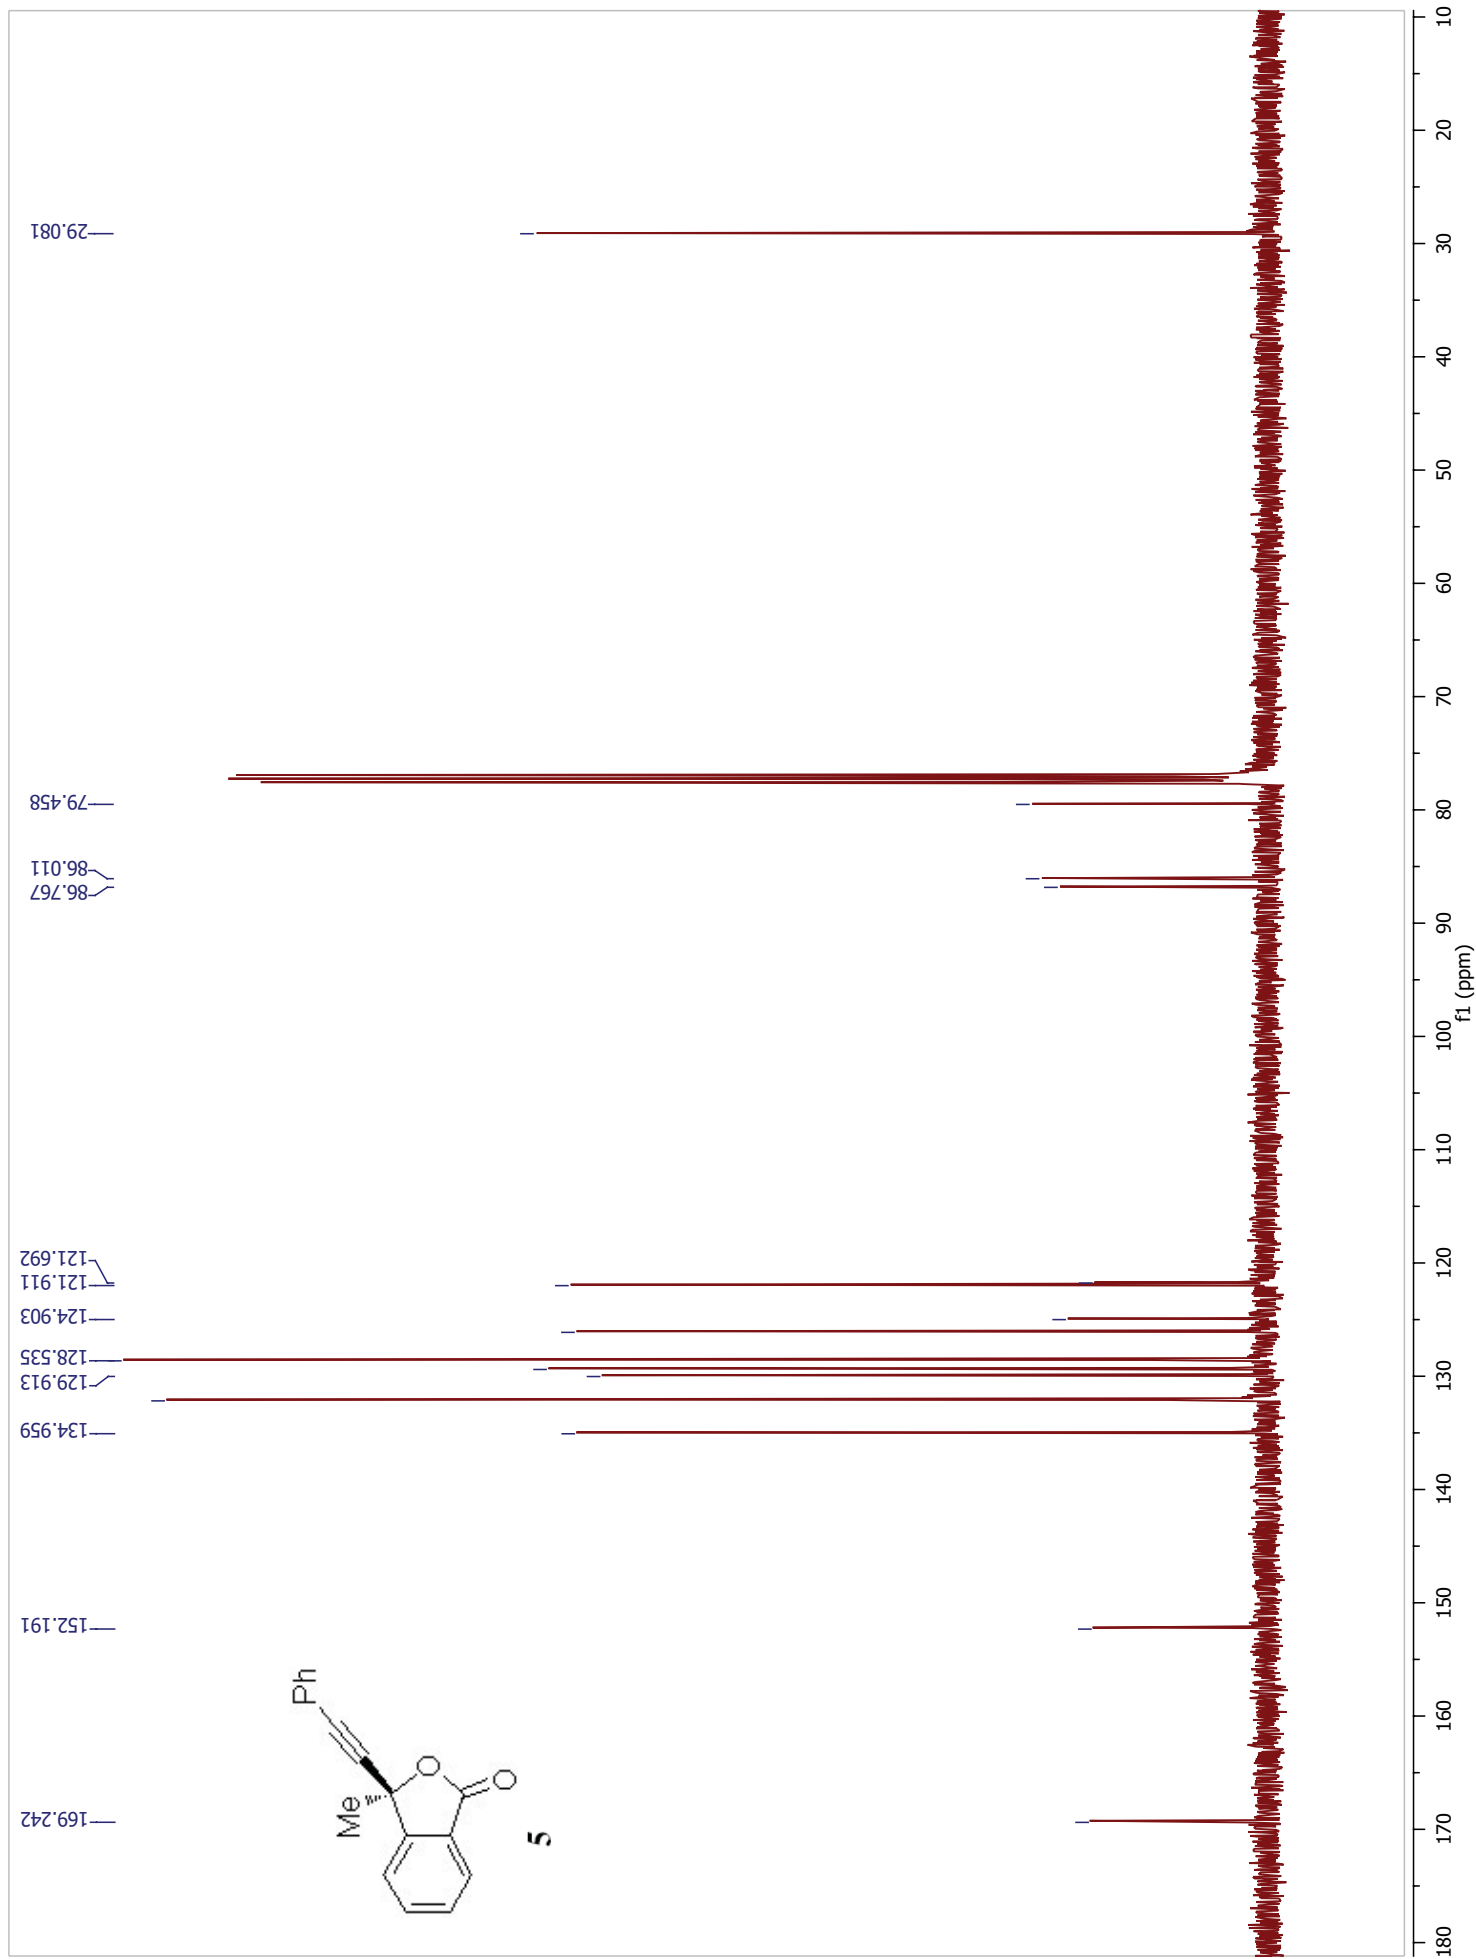

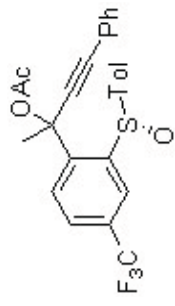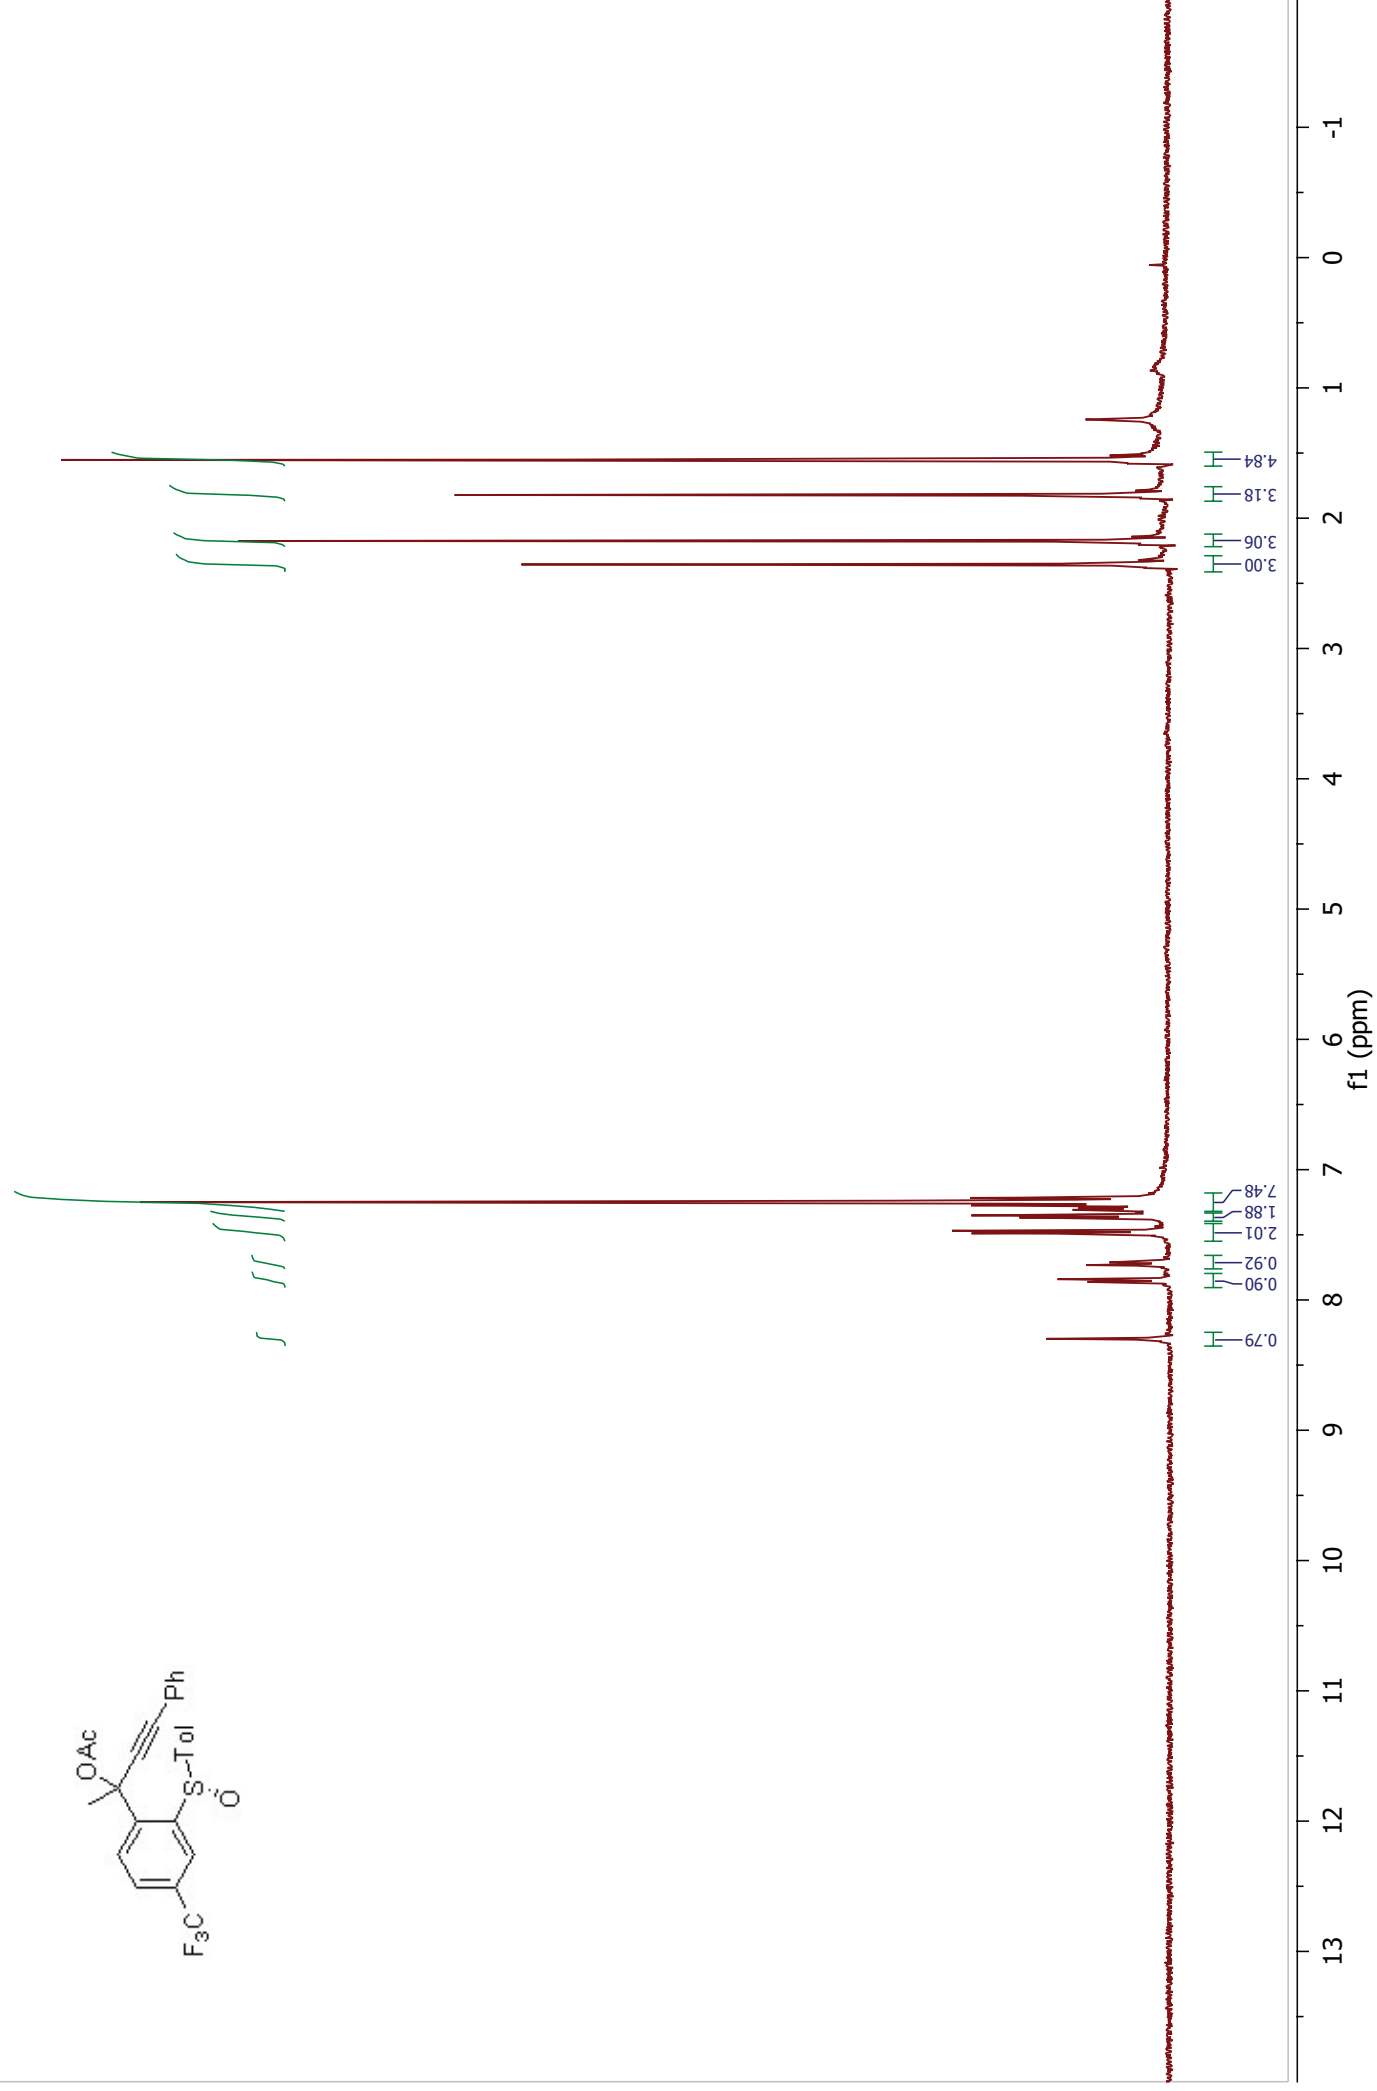



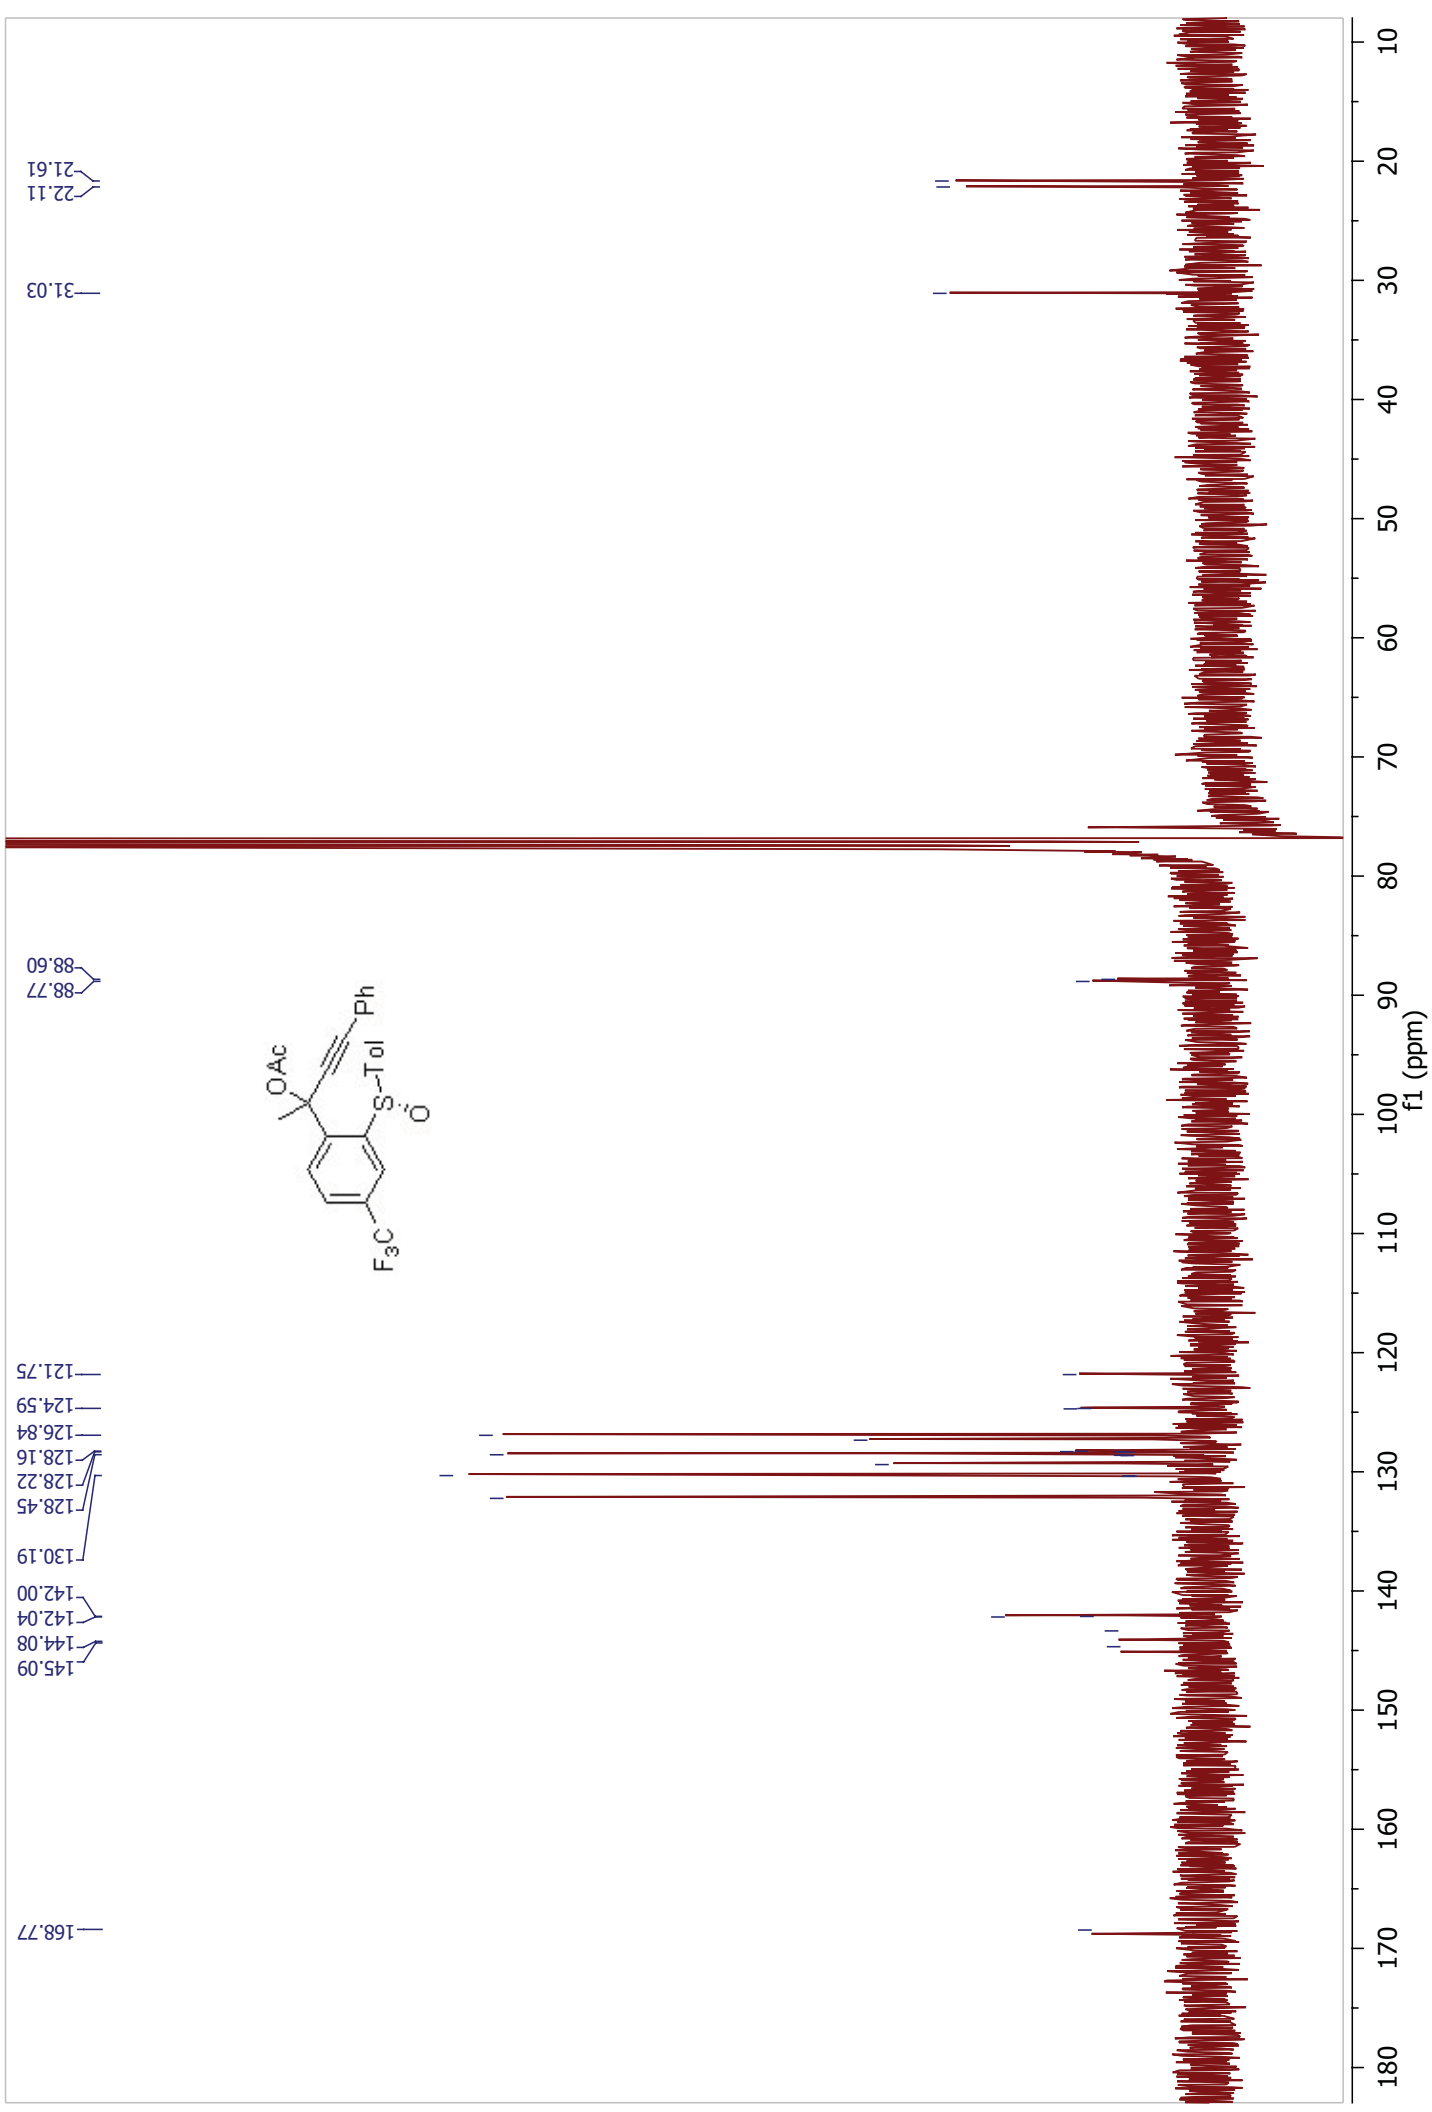

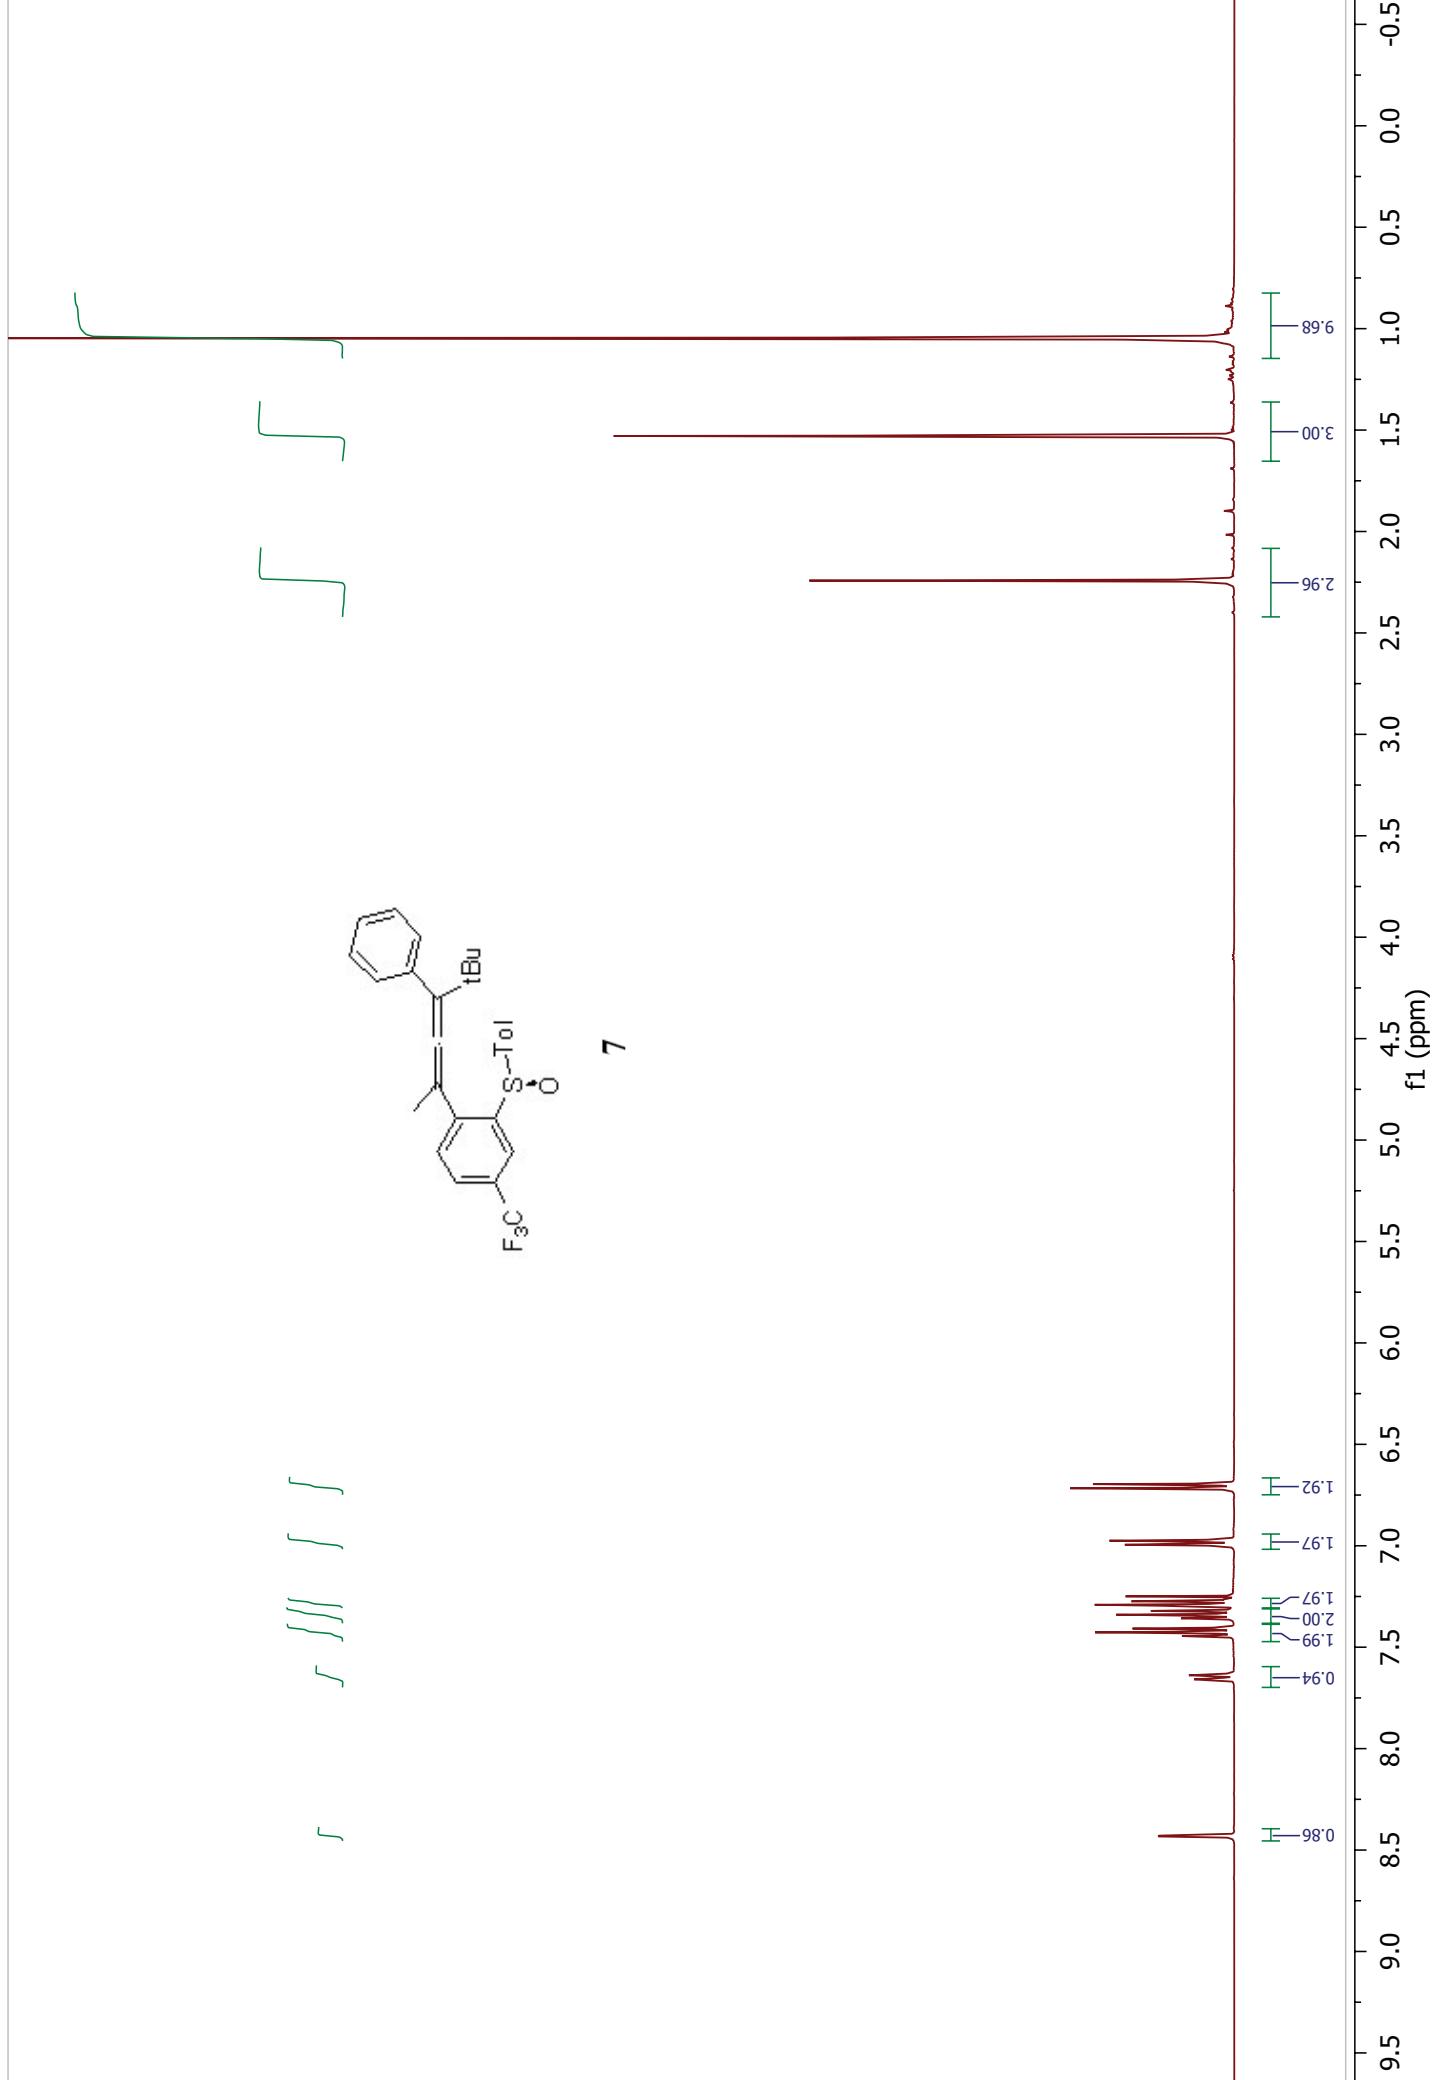

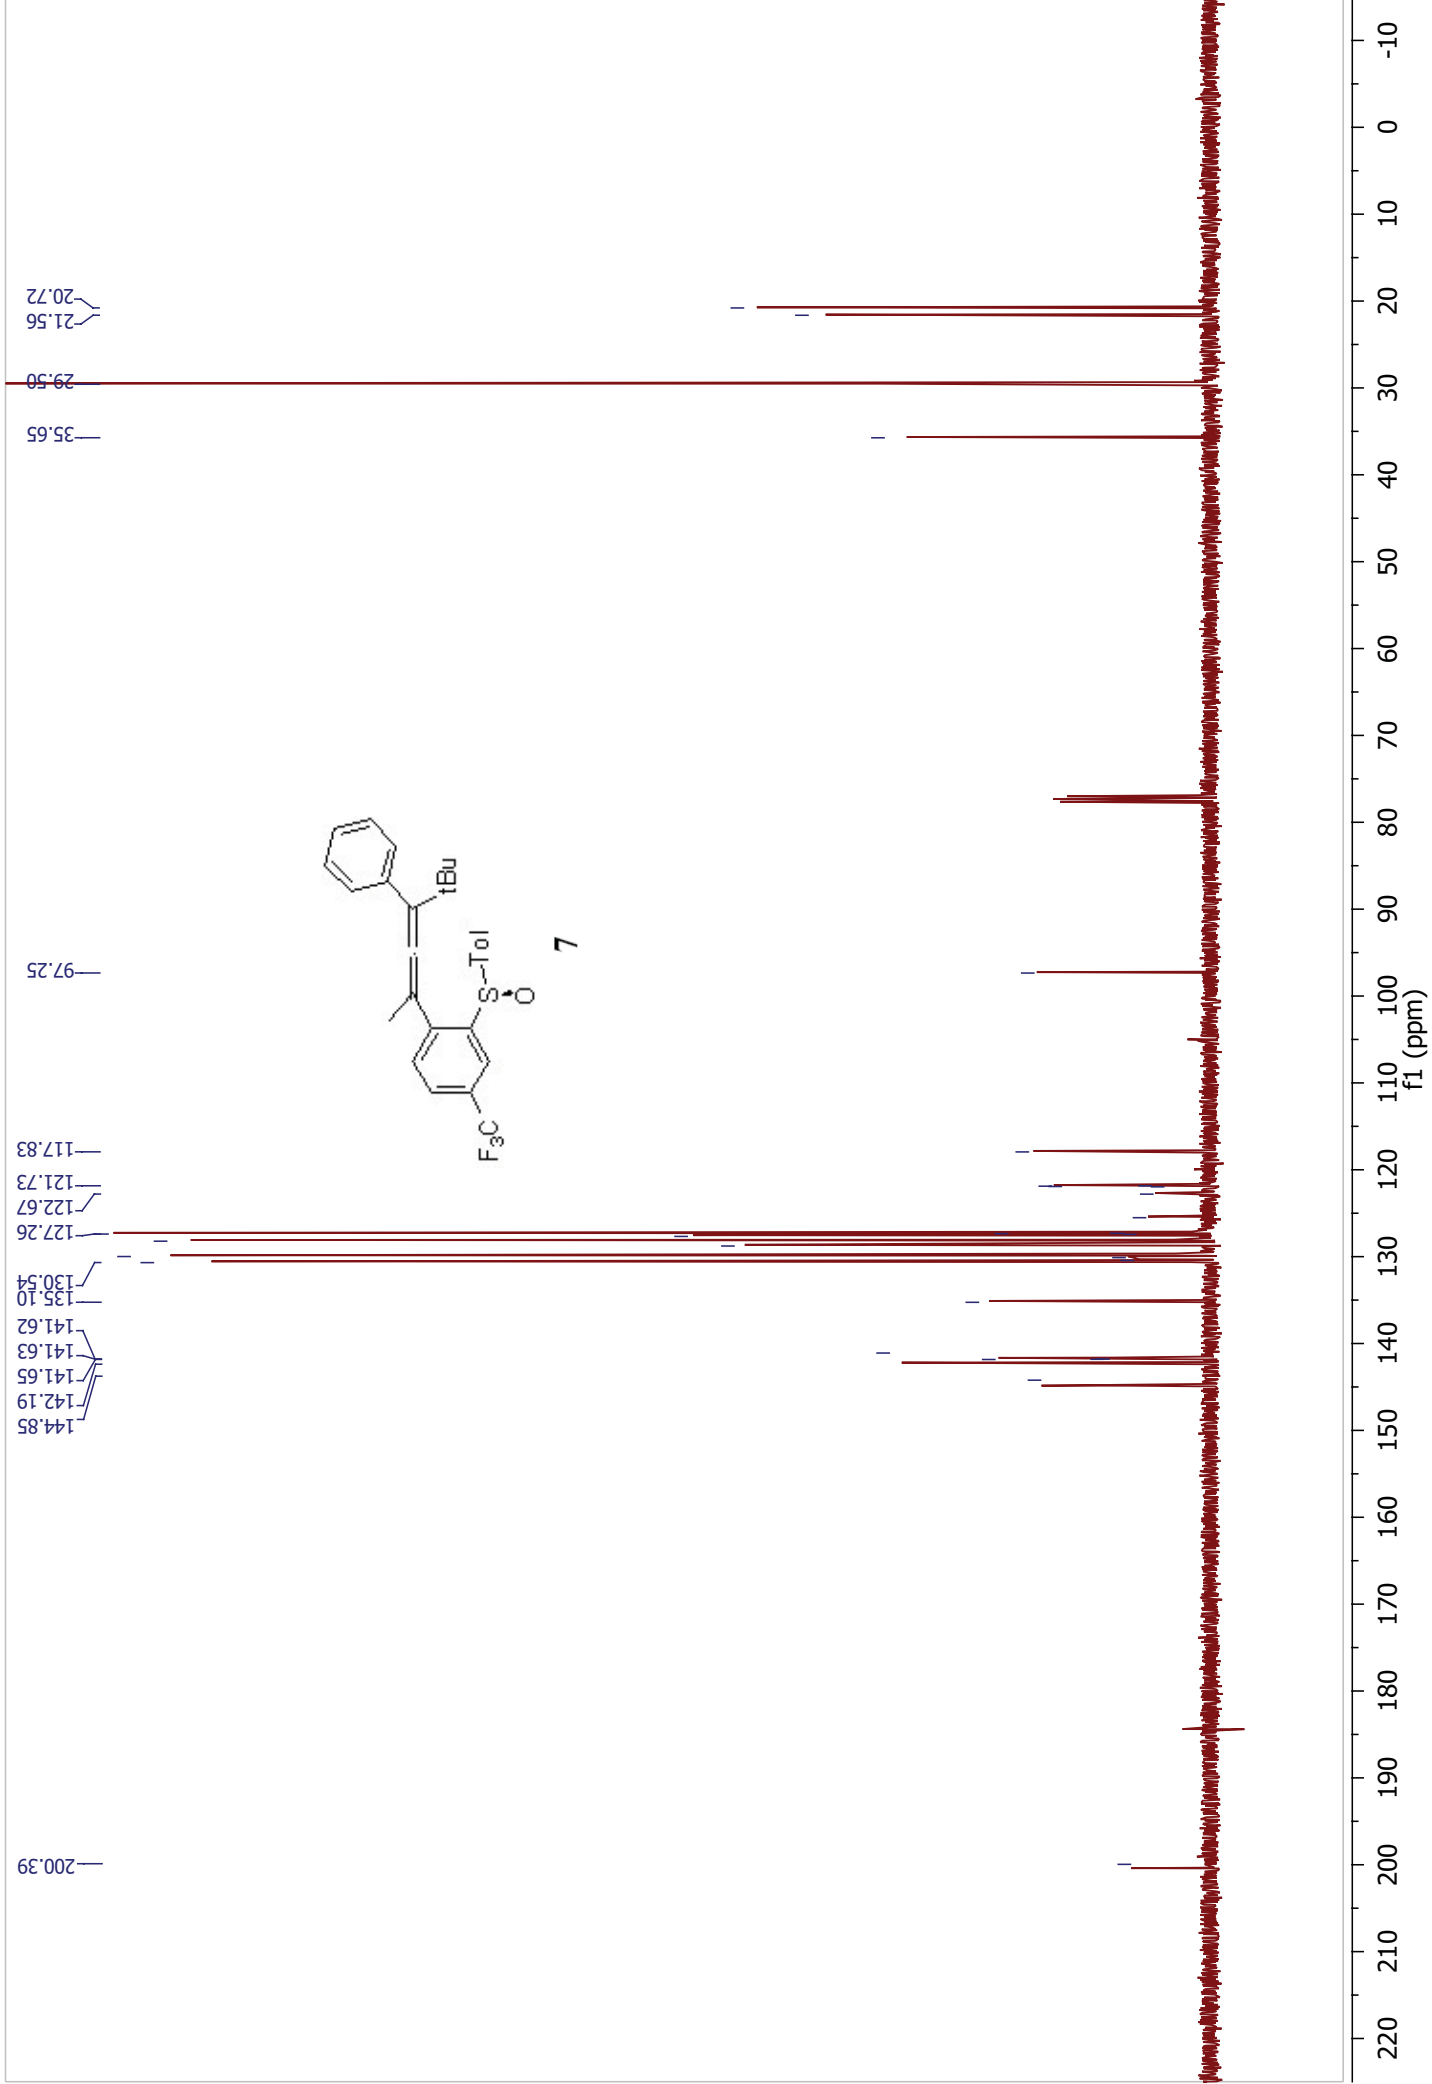

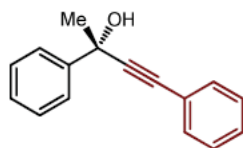

Table 3, Entry 1.

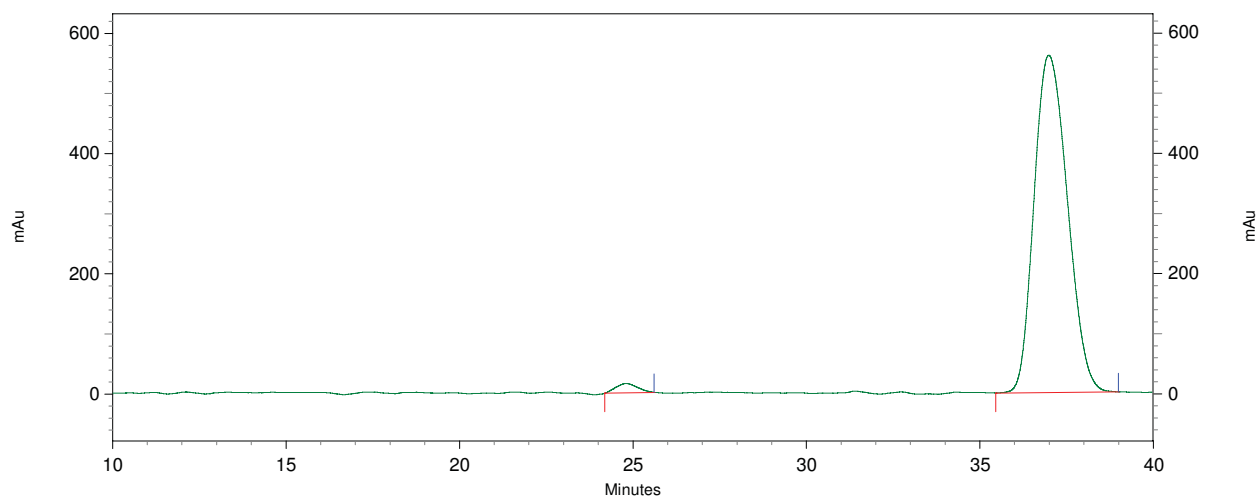

| Retention Time | Height | Height Percent | Area     | Area Percent |
|----------------|--------|----------------|----------|--------------|
| 24.795         | 15667  | 2.716          | 677784   | 1.772        |
| 36.965         | 561103 | 97.284         | 37562276 | 98.228       |

|        |        |         |          |         |
|--------|--------|---------|----------|---------|
| Totals | 576770 | 100.000 | 38240060 | 100.000 |
|--------|--------|---------|----------|---------|

Table 3, Entry 1.

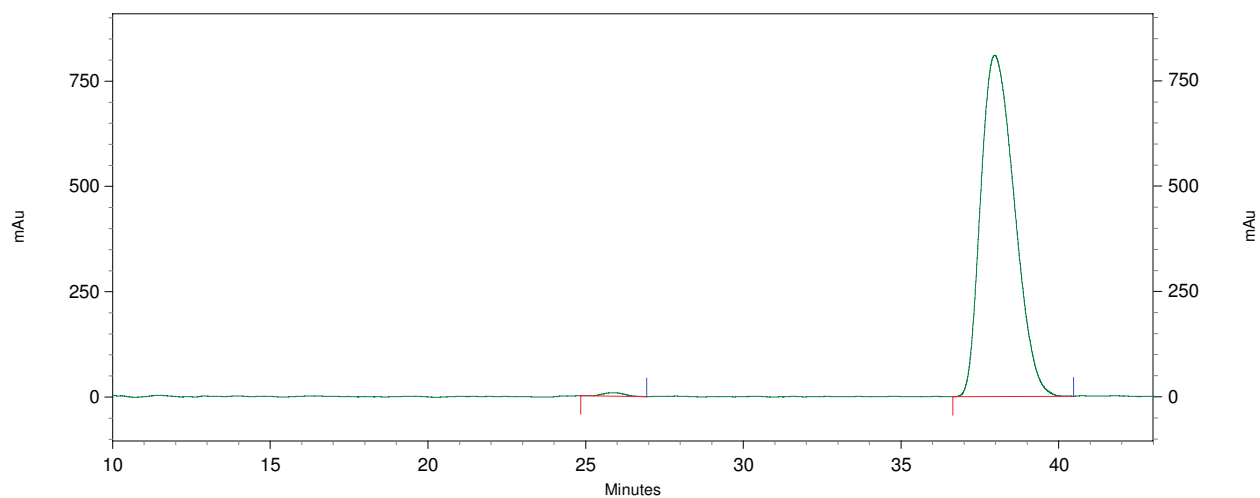

| Retention Time | Height | Height Percent | Area     | Area Percent |
|----------------|--------|----------------|----------|--------------|
| 25.840         | 8021   | 0.980          | 398625   | 0.659        |
| 37.947         | 810362 | 99.020         | 60104042 | 99.341       |

|        |        |         |          |         |
|--------|--------|---------|----------|---------|
| Totals | 818383 | 100.000 | 60502667 | 100.000 |
|--------|--------|---------|----------|---------|

Table 3, Entry 2. Racemic.

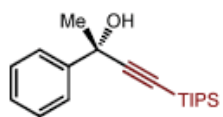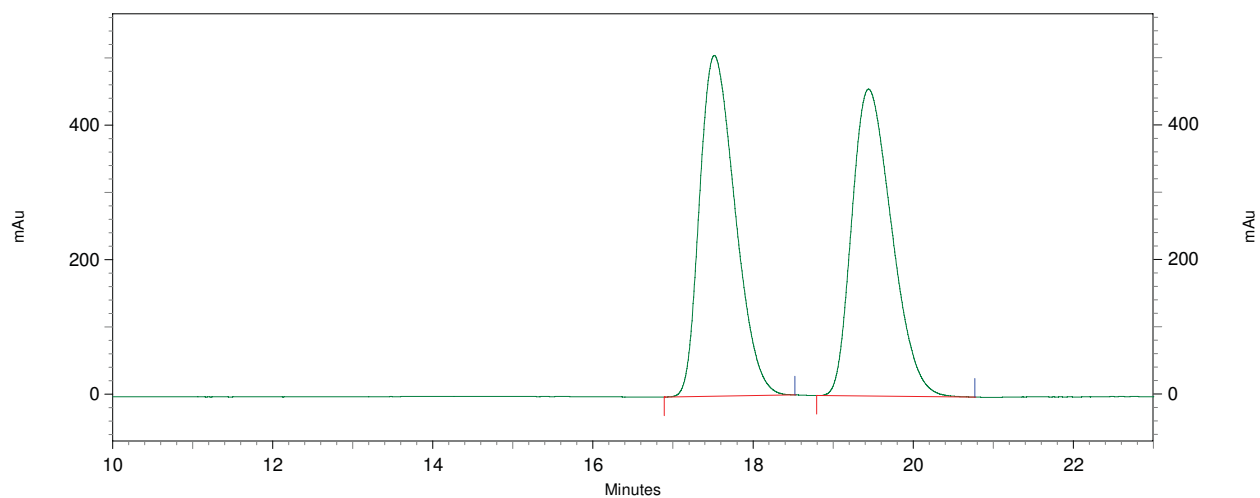

| Retention Time | Height | Height Percent | Area     | Area Percent |
|----------------|--------|----------------|----------|--------------|
| 17.509         | 506967 | 52.608         | 15597985 | 49.722       |
| 19.440         | 456695 | 47.392         | 15772101 | 50.278       |
| Totals         | 963662 | 100.000        | 31370086 | 100.000      |

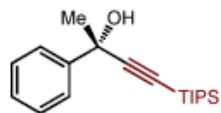

Table 3, Entry 2.

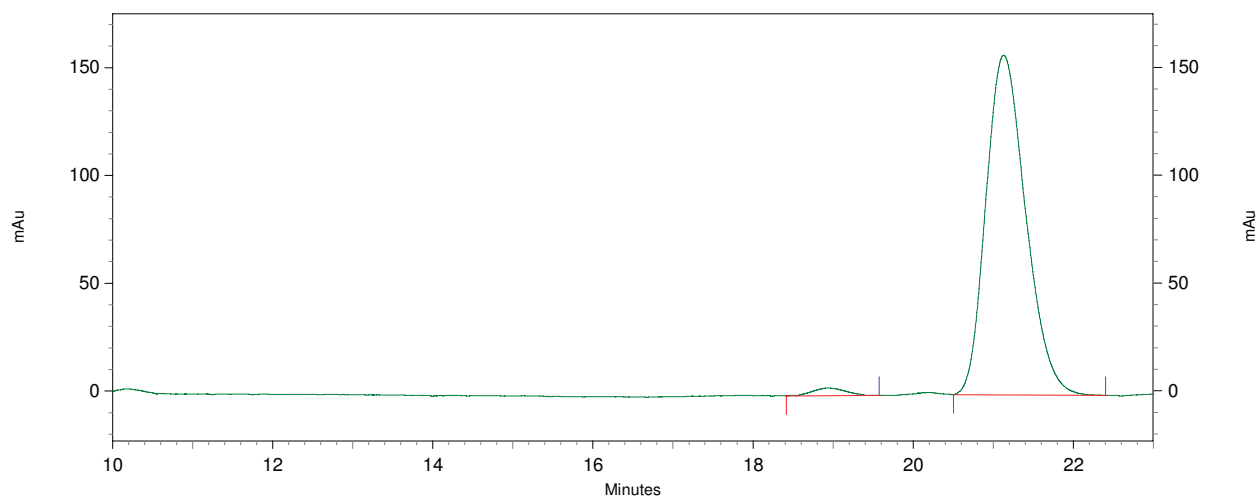

| Retention Time | Height | Height Percent | Area    | Area Percent |
|----------------|--------|----------------|---------|--------------|
| 18.928         | 3614   | 2.242          | 104957  | 1.892        |
| 21.125         | 157595 | 97.758         | 5443252 | 98.108       |
| Totals         | 161209 | 100.000        | 5548209 | 100.000      |

Table 3, Entry 3. Racemic.

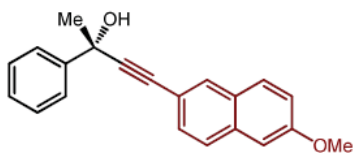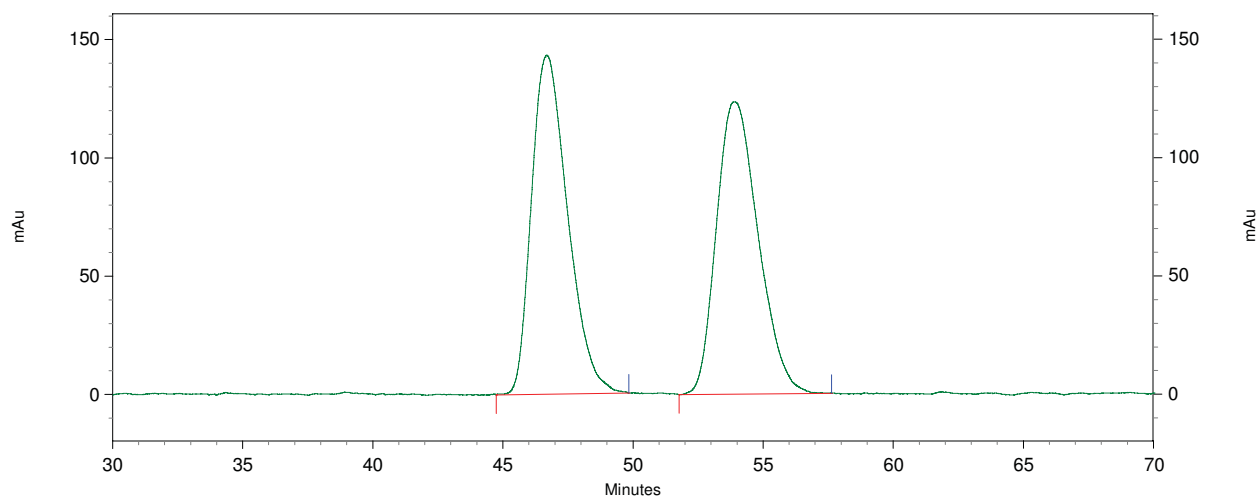

| Retention Time | Height | Height Percent | Area     | Area Percent |
|----------------|--------|----------------|----------|--------------|
| 46.667         | 143342 | 53.695         | 13857605 | 50.087       |
| 53.861         | 123612 | 46.305         | 13809663 | 49.913       |
| Totals         | 266954 | 100.000        | 27667268 | 100.000      |



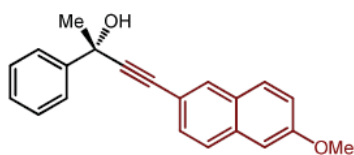

**Table 3. Entry 3.**

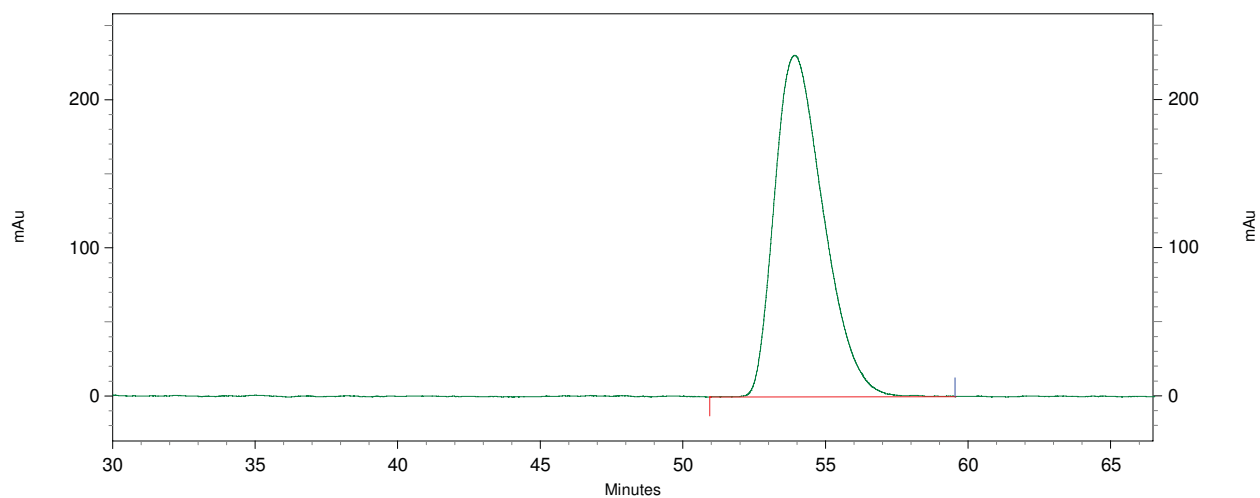

| Retention Time | Height | Height Percent | Area     | Area Percent |
|----------------|--------|----------------|----------|--------------|
| 53.909         | 230608 | 100.000        | 27630078 | 100.000      |
| Totals         | 230608 | 100.000        | 27630078 | 100.000      |

Table 3, Entry 4. Racemic.

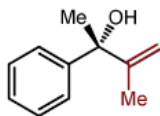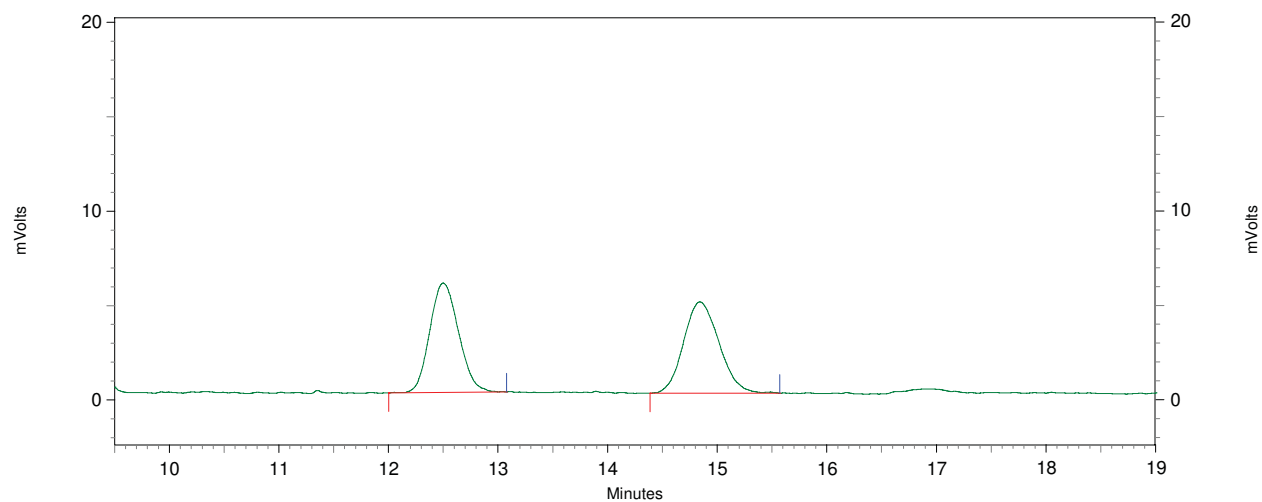

| Retention Time | Height | Height Percent | Area   | Area Percent |
|----------------|--------|----------------|--------|--------------|
| 12.500         | 5789   | 54.500         | 105897 | 49.291       |
| 14.833         | 4833   | 45.500         | 108944 | 50.709       |
| Totals         | 10622  | 100.000        | 214841 | 100.000      |

Table 3, Entry 4.

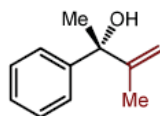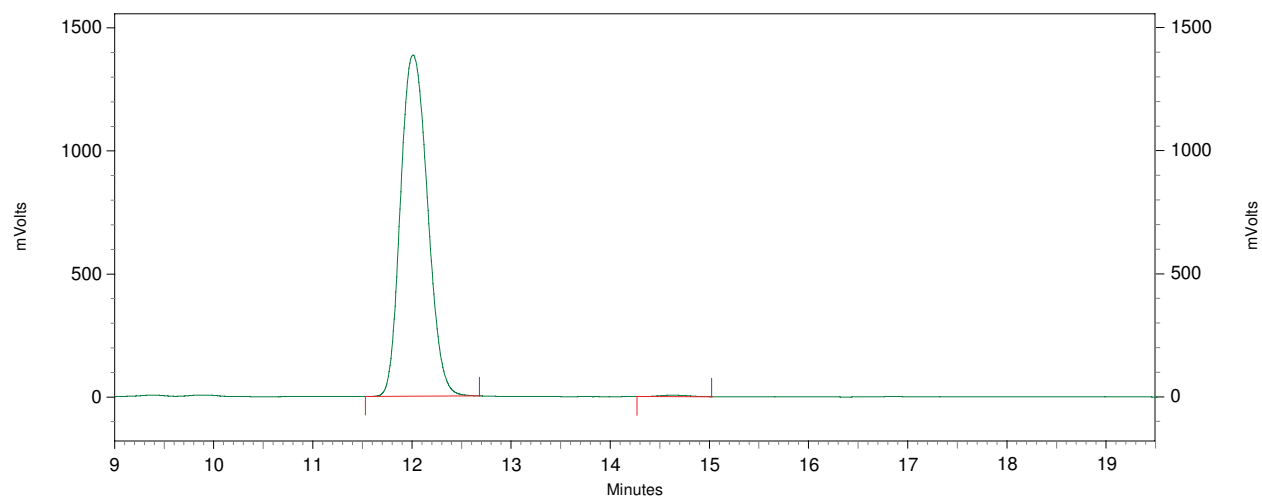

| Retention Time | Height  | Height Percent | Area     | Area Percent |
|----------------|---------|----------------|----------|--------------|
| 12.008         | 1386757 | 99.601         | 26258557 | 99.550       |
| 14.625         | 5551    | 0.399          | 118692   | 0.450        |
| Totals         | 1392308 | 100.000        | 26377249 | 100.000      |

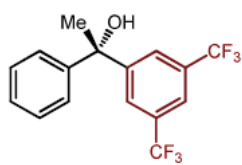

**Table 3, Entry 5. Racemic.**

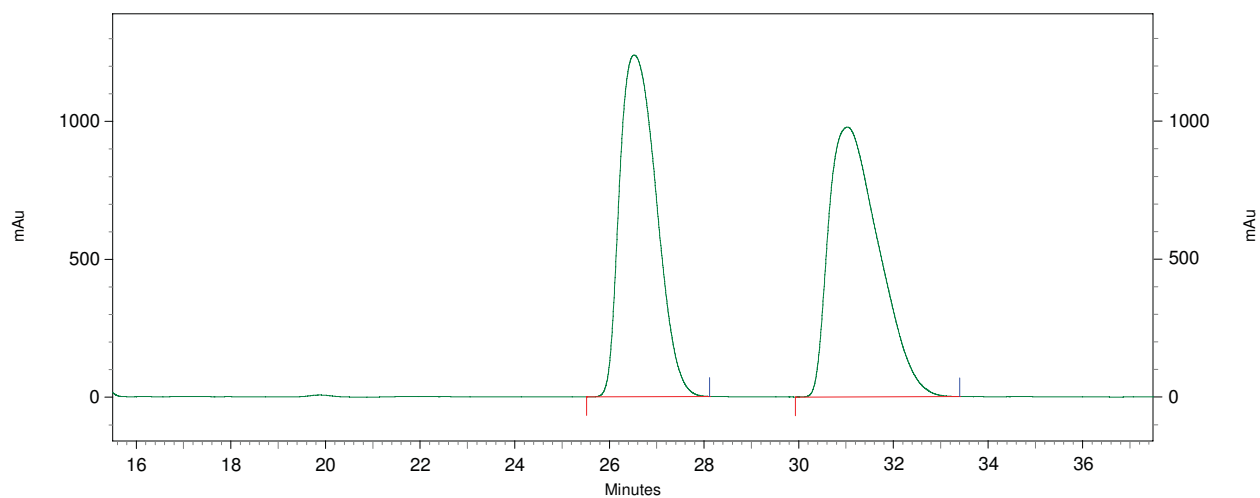

| Retention Time | Height  | Height Percent | Area     | Area Percent |
|----------------|---------|----------------|----------|--------------|
| 26.523         | 1238669 | 55.875         | 66886811 | 48.121       |
| 31.019         | 978181  | 44.125         | 72110229 | 51.879       |

|        |         |         |           |         |
|--------|---------|---------|-----------|---------|
| Totals | 2216850 | 100.000 | 138997040 | 100.000 |
|--------|---------|---------|-----------|---------|

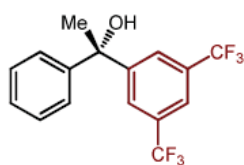

Table 3, Entry 5.

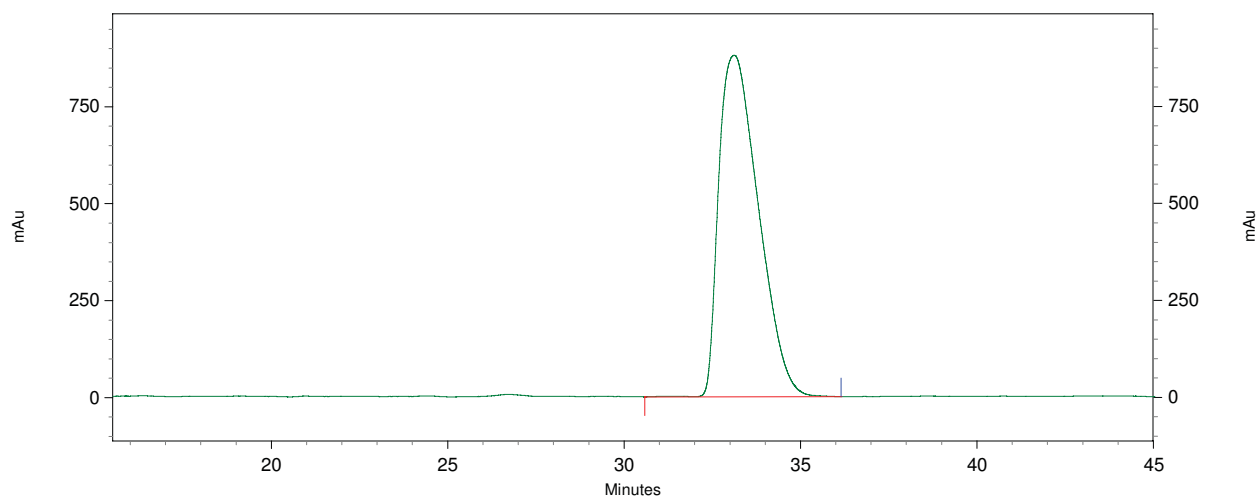

| Retention Time | Height | Height Percent | Area     | Area Percent |
|----------------|--------|----------------|----------|--------------|
| 33.115         | 881008 | 100.000        | 68907435 | 100.000      |
| Totals         | 881008 | 100.000        | 68907435 | 100.000      |

Table 3, Entry 6. Racemic.

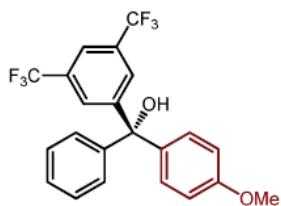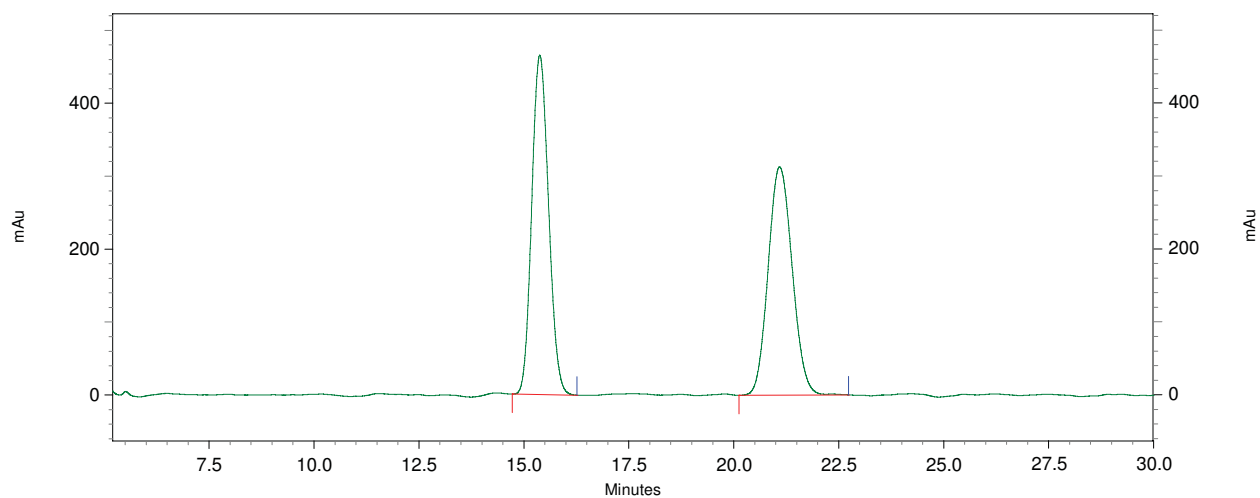

| Retention Time | Height | Height Percent | Area     | Area Percent |
|----------------|--------|----------------|----------|--------------|
| 15.371         | 465379 | 59.779         | 12982613 | 50.973       |
| 21.077         | 313123 | 40.221         | 12487019 | 49.027       |
| Totals         | 778502 | 100.000        | 25469632 | 100.000      |

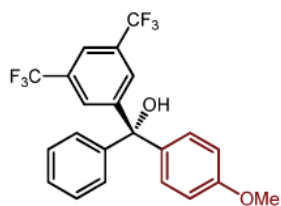

**Table 3, Entry 6.**

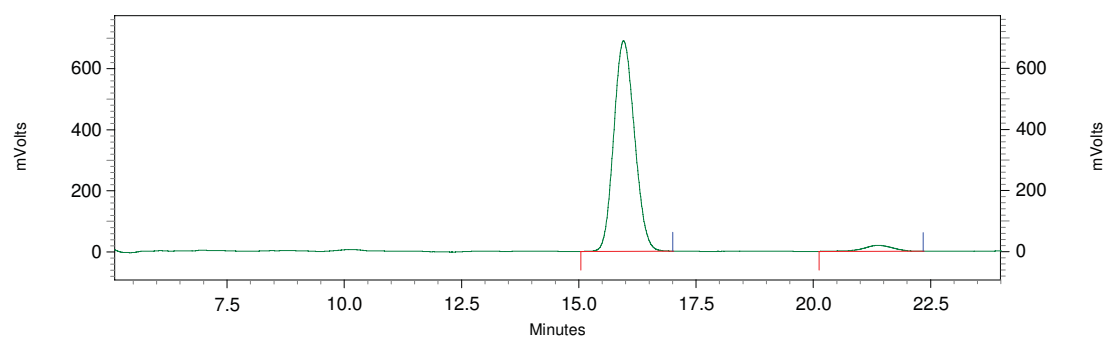

| Retention Time | Area     | Area % | Height | Height % |
|----------------|----------|--------|--------|----------|
| 15.942         | 21157585 | 96.04  | 689110 | 97.25    |
| 21.367         | 871816   | 3.96   | 19522  | 2.75     |
| Totals         | 22029401 | 100.00 | 708632 | 100.00   |

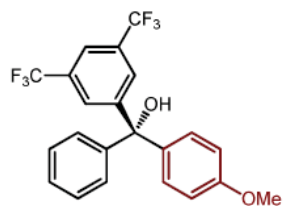

Table 3, Entry 6.

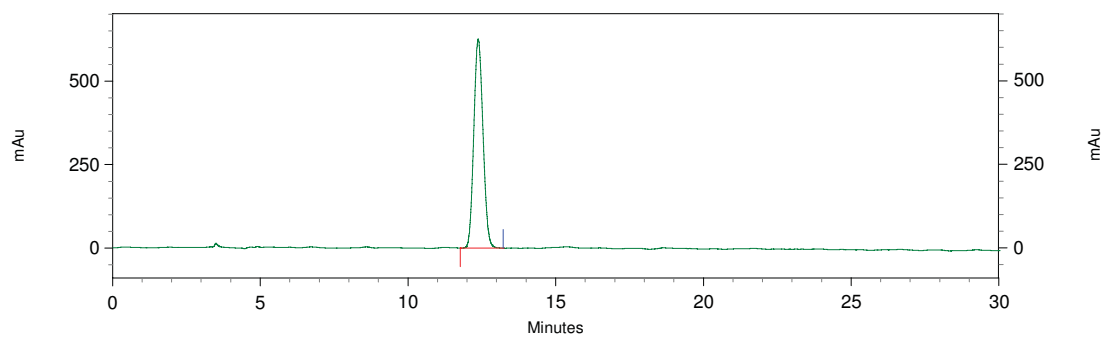

| Retention Time | Area   | Area % | Height | Height % |
|----------------|--------|--------|--------|----------|
| 12.368         | 888152 | 100.00 | 41113  | 100.00   |
| Totals         | 888152 | 100.00 | 41113  | 100.00   |



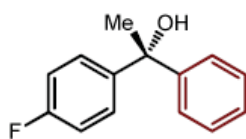

Table 3, Entry 7. Racemic.

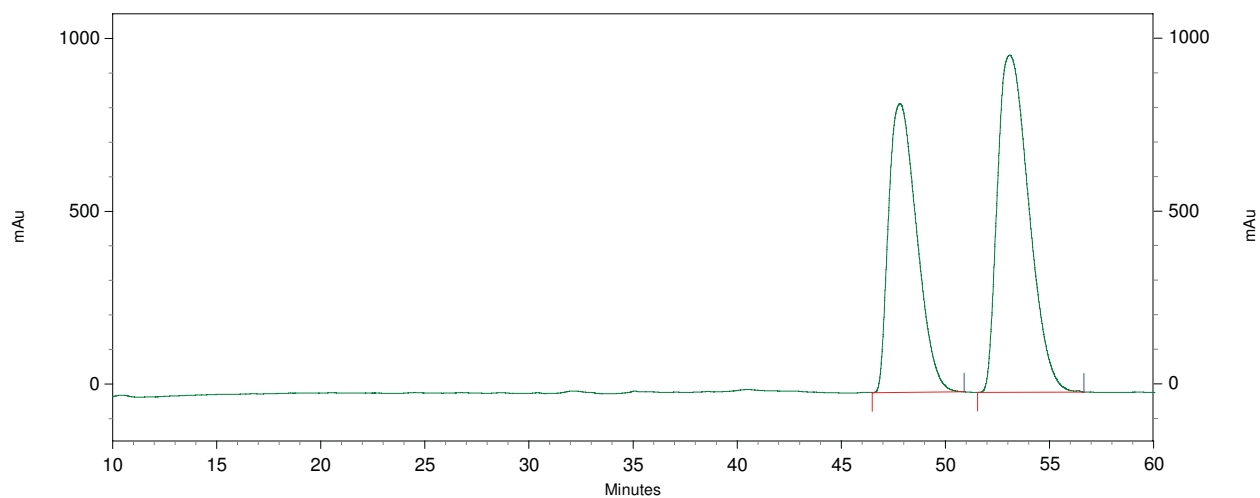

| Retention Time | Height  | Height Percent | Area      | Area Percent |
|----------------|---------|----------------|-----------|--------------|
| 47.797         | 835964  | 46.134         | 78423687  | 43.394       |
| 53.061         | 976081  | 53.866         | 102302670 | 56.606       |
| Totals         | 1812045 | 100.000        | 180726357 | 100.000      |



Table 3, Entry 7.

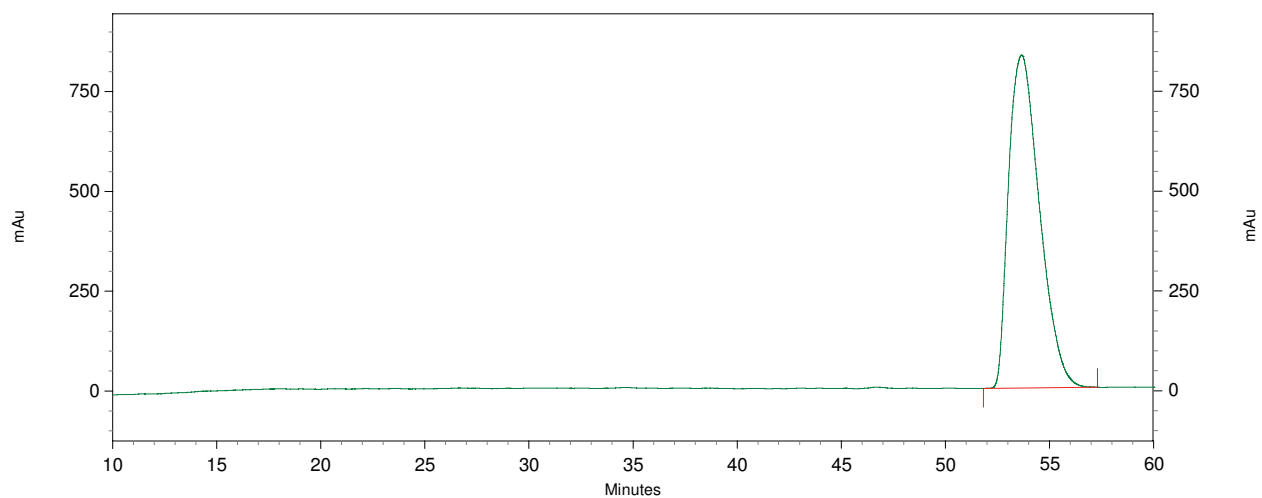

| Retention Time | Height | Height Percent | Area     | Area Percent |
|----------------|--------|----------------|----------|--------------|
| 53.637         | 834651 | 100.000        | 86116497 | 100.000      |
| Totals         | 834651 | 100.000        | 86116497 | 100.000      |

Scheme 1. Compound 5. Racemic.

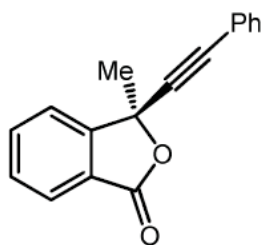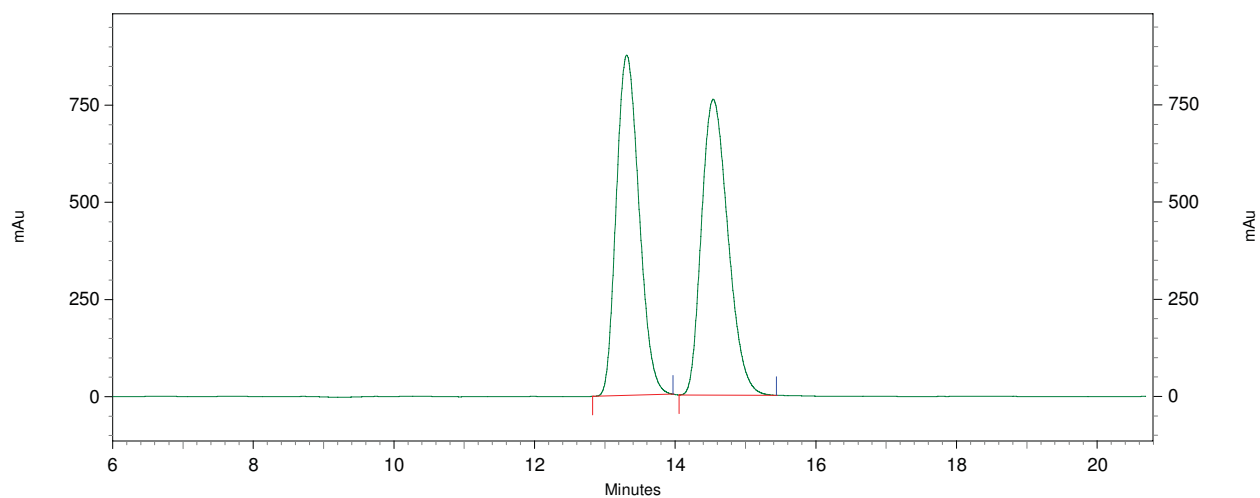

| Retention Time | Height | Height Percent | Area     | Area Percent |
|----------------|--------|----------------|----------|--------------|
| 13.307         | 875834 | 53.496         | 19711809 | 49.729       |
| 14.533         | 761355 | 46.504         | 19926333 | 50.271       |

|        |         |         |          |         |
|--------|---------|---------|----------|---------|
| Totals | 1637189 | 100.000 | 39638142 | 100.000 |
|--------|---------|---------|----------|---------|

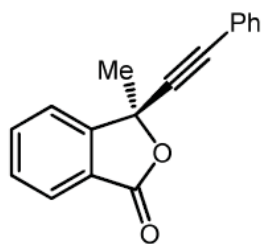

**Scheme 1. Compound 5.**

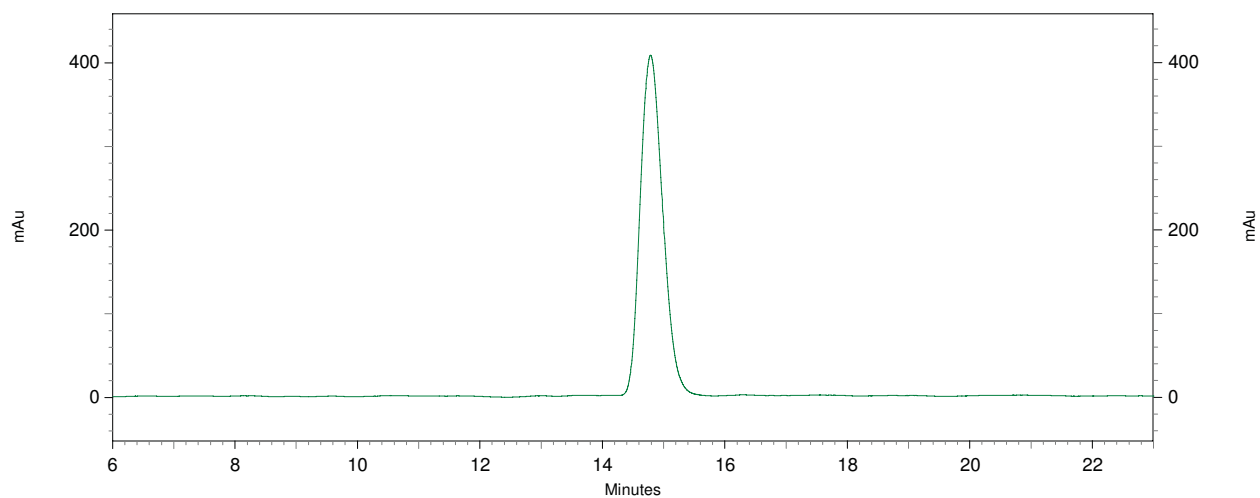

| Retention Time | Height | Height Percent | Area    | Area Percent |
|----------------|--------|----------------|---------|--------------|
| 14.779         | 286503 | 100.000        | 7257075 | 100.000      |
| Totals         | 286503 | 100.000        | 7257075 | 100.000      |
